# Supplementary material for: Improved definition of the mouse transcriptome via targeted RNA sequencing
Source: HighWire-hosted journal article supplement (doi:10.1101/gr.199760.115), 2016-05-01
Supplement: Supplementary_data_2.xlsx [file Supplementary_data_2.xlsx]

## Sheet: Supplementary_data_2
Accession_ID	Classification	Intergenic	Head-Head_Partner_Accession_ID	Head-Head_Distance	Tail-Tail_Partner_Accession_ID	Tail-Tail_Distance	Intronic_Host_Accession_ID_(Exclusive)	Intronic_Host_Accession_ID_(All)	Antisense_Partner_Accession_ID	uaRNA_Host_Accession_ID	Associated_Promoter_Accession_ID	Transcript_Size	CDS_Size	Intron_Size	Genomic_Size	Intron_Count	Exon_Density	CDS_Density	Splice_Junction_Density	PUF_Motif_Frequency_(whole transcript)	PUF_Motif_Frequency_(3'UTR only)	ARE_Motif_Frequency_(whole transcript)	ARE_Motif_Frequency_(3'UTR only)	Major_PolyA+_Signal_Frequency	Minor_PolyA_Signal_Frequency	UCSC_Known_Gene_ID	RefSeq_ID	UniGene_Symbol	UniGene_Name	PhastCons_Score_(Total)	PhastCons_Score_(Mean)	LincRNA	lncRNAdb_ID	CPC_Score	CPAT_Score	PhyloCSF_filtered	Cuffcmp_transcript	Cuffcmp_loci
AB010885	ncRNA								M10062			2758	0	12272	15038	2	0.184	0	0.725			2		1	1					195.885	0.071		Borg	0.238852	0.109113		TCONS_00010239	XLOC_007876
AB063319	ncRNA	TRUE										5244	0	819	6067	2	0.865	0	0.381	4		14								125.147	0.024		Rian	-0.966141	0.0956696		TCONS_00005903	XLOC_004663
AB064489	ncRNA							AK084488				3521	0	701	4226	1	0.834	0	0.284			3								705.344	0.2			-1.02694	0.0194537		TCONS_00014308	XLOC_011065
AB076245	ncRNA	TRUE	Belgard_TCONS_01878632	-304								2064	0	0	2064	0	1	0	0	2		7								67.451	0.033		Rian		0.0268025		TCONS_00005908	XLOC_004663
AB163988	ncRNA						AF537056,M13788,M30041.2	AF537056				294	0	0	294	0	1	0	0			1								42.621	0.145			2.76416	0.0569797		TCONS_00006642	XLOC_005184
AB205019	ncRNA	TRUE							AK079198			2699	0	0	2699	0	1	0	0			4												-1.22059	0.0454567		TCONS_00016993	XLOC_013159
AB221667	ncRNA	TRUE										360	0	0	363	0	1	0	0			1								0	0			-1.39121	0.109952		TCONS_00015845	XLOC_012239
AB250374	ncRNA						NM_008069,BC130258,X55273,U14418,BC157920	BC157920				246	0	0	247	0	1	0	0											0.223	0.001			0.0412403	0.00443645		TCONS_00020867	XLOC_016224
AB281679	ncRNA							AB281675				484	0	0	484	0	1	0	0			4								38.887	0.08			-0.945238	0.0383962		TCONS_00027624	XLOC_021536
AB294520	ncRNA									BC056444		929	0	6172	7101	5	0.131	0	5.382							uc008yso.2		Miat	Mus musculus adult male hypothalamus cDNA, RIKEN full-length enriched library, clone:A230057G18 product:unclassifiable, full insert sequence.	235.442	0.253		Gomafu	-1.15421	0.13456		TCONS_00022025	XLOC_017175
AB294521	ncRNA									BC056444		826	0	6275	7101	4	0.116	0	4.843							uc008ysq.2		Miat	Mus musculus adult male hypothalamus cDNA, RIKEN full-length enriched library, clone:A230057G18 product:unclassifiable, full insert sequence.	235.442	0.285		Gomafu	-1.22798	0.151693		TCONS_00022026	XLOC_017175
AB294522	ncRNA									BC056444		818	0	6283	7101	4	0.115	0	4.89							uc008ysp.2		Miat	Mus musculus adult male hypothalamus cDNA, RIKEN full-length enriched library, clone:A230057G18 product:unclassifiable, full insert sequence.	235.355	0.288		Gomafu	-1.11386	0.0912313		TCONS_00022027	XLOC_017175
AB294523	ncRNA									BC056444		806	0	6295	7101	3	0.114	0	3.722							uc008ysr.2		Miat	Mus musculus adult male hypothalamus cDNA, RIKEN full-length enriched library, clone:A230057G18 product:unclassifiable, full insert sequence.	235.325	0.292		Gomafu	-1.0882	0.158255		TCONS_00022028	XLOC_017175
AB294524	ncRNA									BC056444		770	0	6331	7101	3	0.108	0	3.896							uc008yss.2		Miat	Mus musculus adult male hypothalamus cDNA, RIKEN full-length enriched library, clone:A230057G18 product:unclassifiable, full insert sequence.	235.269	0.306		Gomafu	-1.0951	0.0525429		TCONS_00022029	XLOC_017175
AB514567	ncRNA						AF537056,S63186.2,M13788	AF537056				296	0	72398	72694	2	0.004	0	6.757			1								47.523	0.161			2.95033	0.0409157		TCONS_00006580	XLOC_005184
AF003867	ncRNA											1206	0	522350	523557	8	0.002	0	6.633			2								2.925	0.002			0.706586	0.0260907		TCONS_00019465	XLOC_015049
AF014451	ncRNA						AK141807,BC148328,NM_170757,AF349751	AK141807				367	0	0	367	0	1	0	0											0.992	0.003			0.161345	0.0110979		TCONS_00014809	XLOC_011442
AF014454	ncRNA									AK076820		1060	0	0	1067	0	1	0	0			4		1						177.987	0.168			-1.19239	0.101022		TCONS_00018881	XLOC_014569
AF019615	ncRNA						BC146581,BC141438,L12705,NM_010134,AK157766	AK157766				364	0	0	365	0	1	0	0											2.161	0.006			-1.11581	0.018565		TCONS_00020660	XLOC_016058
AF022079	ncRNA		U67841	0					EF535990	AK158121		1351	0	0	1354	0	1	0	0											281.993	0.209			-1.00849	0.217277	-1004.84	TCONS_00023309	XLOC_018164
AF032130	ncRNA						AF090402,BC056346,NM_001159517,AF090403,BC053426,AK132303,NM_001159516,AF090404,U44940,NM_021881,AF091047	AF090403				3274	0	0	3280	0	1	0	0			12								491.813	0.15			-1.01455	0.0226084	-66.1125	TCONS_00012338	XLOC_009596
AF032968	ncRNA									NM_009877		1181	0	35705	36886	3	0.032	0	2.54			2		1	1	uc008tog.1		AF032968	Mus musculus strain C3H/HeN mRNA preferentially expressed in LPS-normoresponsive macrophages.	218.739	0.185			-0.939164	0.0642007		TCONS_00020111	XLOC_015608
AF032969	ncRNA									NM_009877		1046	0	36632	37681	2	0.028	0	1.912			2								202.549	0.194				0.0585574		TCONS_00020112	XLOC_015608
AF037046	ncRNA	TRUE										1063	0	0	1070	0	1	0	0			1		1	1					121.131	0.114			3.50545	0.0996744		TCONS_00022851	XLOC_017807
AF037047	ncRNA	TRUE										1070	0	0	1070	0	1	0	0			1		1	1					121.259	0.113			3.0474	0.099663		TCONS_00022852	XLOC_017807
AF043513	ncRNA								NM_001177543.3			660	0	0	674	0	1	0	0			3								7.291	0.011			-0.332901	0.0028155		TCONS_00016035	XLOC_012385
AF059259	ncRNA	TRUE										334	0	0	334	0	1	0	0											162.285	0.486				0.0126606		TCONS_00020755	XLOC_016137
AF061179	ncRNA						BC058104,NM_201354	BC058104				988	0	0	988	0	1	0	0	1		1								51.756	0.052			-1.21921	0.0221164	24.468	TCONS_00013853	XLOC_010743
AF062522	ncRNA						BC020189,BC094658,NM_133741,NM_001164572,AK082185	AK082185				344	0	0	344	0	1	0	0			1								44.528	0.129			-1.42888	0.00225828		TCONS_00027980	XLOC_021835
AF072780	ncRNA	TRUE							BC087904			279	0	0	286	0	1	0	0											177.347	0.636			0.85877	0.00605678		TCONS_00023492	XLOC_018312
AF093701	ncRNA	TRUE										264	0	0	265	0	1	0	0			1								40.817	0.155			0.374946	0.0270407		TCONS_00028980	XLOC_022642
AF120319	ncRNA				AK014583	-18	BC145373,BC141095	BC141095				1462	0	0	1466	0	1	0	0			1								7.719	0.005			0.900161	0.10852		TCONS_00005130	XLOC_004132
AF120320	ncRNA								NM_001242349			268	0	0	268	0	1	0	0											1.435	0.005			-1.17956	0.0332849		TCONS_00024896	XLOC_019461
AF120322	ncRNA	TRUE							AK142514			572	0	0	578	0	1	0	0											16.692	0.029			-1.10242	0.0543409		TCONS_00021408	XLOC_016673
AF138745	ncRNA									NM_009440		4278	0	49153	53441	4	0.08	0	0.935			4		2	1					493.375	0.115		Tsix	-1.31818	0.0978899	6.6104	TCONS_00029085	XLOC_022740
AF173359	ncRNA								AK039035			1083	0	0	1083	0	1	0	0											771.941	0.713			-0.356551	0.146802		TCONS_00017199	XLOC_013292
AF177020	ncRNA								AK147943			421	0	0	421	0	1	0	0											201.36	0.478			-1.08241	0.00169057		TCONS_00022551	XLOC_017583
AF217545	ncRNA				AK084680	32			AK147943			2769	0	0	2769	0	1	0	0			4		2	2	uc009bfw.1		AF217545	Mus musculus Mit1/Lb9 mRNA, partial sequence.	164.401	0.059			-0.899913	0.156676		TCONS_00022544	XLOC_017582
AF223568	ncRNA	TRUE										1074	0	0	1078	0	1	0	0											126.95	0.118	TRUE		0.166613	0.245375	-95.3366	TCONS_00012060	XLOC_009356
AF223569	ncRNA	TRUE										893	0	0	903	0	1	0	0											115.409	0.129			2.37674	0.098781		TCONS_00025399	XLOC_019814
AF223674	ncRNA		AF222442	-790					AF222444			449	0	1802	2251	2	0.199	0	4.454							uc009kcd.1		Nkx-1.2	Mus musculus homeodomain protein Nkx-1.2T5.1 (Nkx-1.2) mRNA, partial cds.	346.744	0.772			-1.34065	0.0462132		TCONS_00024829	XLOC_019413
AF230110	ncRNA	TRUE										361	0	3864	4225	1	0.085	0	2.77			1		1	1					12.19	0.034				0.0397194		TCONS_00006046	XLOC_004769
AF240177	ncRNA		AF165118	261					BC049143		AB447554,AF031634,AF045023,AF045485,AF045486,AF113109,AF113110,AF165118,AF240168,M19900,M91699,U56408	274	0	0	274	0	1	0	0	1										22.955	0.084			-0.754971	0.00443422		TCONS_00005971	XLOC_004702
AF267728	ncRNA								AK077524			2181	0	0	2188	0	1	0	0	1		1								549.841	0.252			0.997093	0.0695016		TCONS_00020733	XLOC_016117
AF291468	ncRNA		AK006861	22					AF291465			706	0	0	706	0	1	0	0			1								59.413	0.084			-1.03864	0.0336334		TCONS_00020211	XLOC_015696
AF296437	ncRNA						AF537056,S63186.2,M13788,AF303853,AB049817,L41877,JF920828	AF537056				294	0	0	294	0	1	0	0			1								27.106	0.092			2.68911	0.0541759		TCONS_00006613	XLOC_005184
AF307450	ncRNA	TRUE										472	0	0	472	0	1	0	0	2										77.949	0.165			-1.24468	0.0325404	-577.215	TCONS_00023979	XLOC_018712
AF319945	ncRNA											2266	0	11934	14200	4	0.16	0	1.765			1		1	1	uc012ckw.1		Nespas	Mus musculus Nespas mRNA, partial sequence, alternatively spliced.	500.63	0.221		Nespas	-1.11894	0.0515815	-159.864	TCONS_00017197	XLOC_013292
AF323987	ncRNA						BC137615,AJ487854,NM_153135,FJ824810,BC145695,BC144784,BC144783	BC144783				3908	0	0	3914	0	1	0	0			11								217.579	0.056			-1.13031	0.00725085		TCONS_00026686	XLOC_020740
AF329434	ncRNA									AK213471		482	0	0	482	0	1	0	0											54.414	0.113			-0.881932	0.0787283		TCONS_00010195	XLOC_007839
AF346502	ncRNA						AK157981	AK157981				316	0	0	316	0	1	0	0			2								207.957	0.658			-0.856157	0.0572831	303.371	TCONS_00021403	XLOC_016668
AF357317	ncRNA						AK007676,AK169545,AK167362,AK159904,AK029463,NM_024225,AK152311,BC002242,AK031873,AK049129,AK078776,AK144710,AK169786,NM_001199188	NM_024225				221	0	0	221	0	1	0	0											160.368	0.726			-1.20978	0.0307768		TCONS_00016955	XLOC_013125
AF357345	ncRNA						AK163246,AB476646,AB087880,AK131120,AK005181,BC049122,AK170073,AK155358,NM_029846,AK030983,AB087881,AB087879,NM_001205392,NM_001205391,BC033362,BC052087	NM_001205391				248	0	0	248	0	1	0	0											14.537	0.059			-1.15078	0.00148803		TCONS_00000384	XLOC_000329
AF357425	ncRNA	TRUE										3476	0	0	3476	0	1	0	0			3			1	uc011yst.1		AF357425	Mus musculus 12 days embryo embryonic body between diaphragm region and neck cDNA, RIKEN full-length enriched library, clone:9430047F21 product:unclassifiable, full insert sequence.	204.132	0.059			-1.13715	0.0708661		TCONS_00005891	XLOC_004663
AF357456	ncRNA								AF022962			304	0	0	305	0	1	0	0											10.017	0.033			-0.285551	0.00290664		TCONS_00023407	XLOC_018246
AF357473	ncRNA						AK122227,AB038145,BC050823,NM_018824,AY004874,AK087175	AK122227				277	0	0	277	0	1	0	0											130.105	0.47			-1.39115	0.009516		TCONS_00016909	XLOC_013089
AF357499	ncRNA						AK129205,NM_001198587,BC060719,AK032126,NM_172544	AK129205				255	0	0	255	0	1	0	0											1.306	0.005			-0.790367	0.0604479		TCONS_00005656	XLOC_004566
AF359411	ncRNA								BC085192			444	0	0	444	0	1	0	0											3.543	0.008				0.0233359		TCONS_00002080	XLOC_001641
AF380425	ncRNA											1377	0	44601	45978	4	0.03	0	2.905			2		1	2	uc007uga.2		Dleu2	Mus musculus Dleu2 mRNA, partial sequence, alternatively spliced.	290.255	0.211			-1.06427	0.0159343		TCONS_00009152	XLOC_007013
AF390105	ncRNA	TRUE										491	0	0	491	0	1	0	0											0	0			3.98481	0.360025		TCONS_00015182	XLOC_011725
AF401983	ncRNA									AF111101		1158	0	9463	10621	4	0.109	0	3.454			2				uc009fbu.1		AF401983	Mus musculus imprinted zinc-finger 2 gene, partial sequence.	142.013	0.123			2.44684	0.174533	-8.6239	TCONS_00024917	XLOC_019476
AF425381	ncRNA		BC138932	266					NM_001177352		AF076523,AK087961,AK133952,AK145084,BC006728,BC138931,BC138932,NM_001177352,NM_001177353,NM_001177354,NM_010849,X01023	430	0	0	430	0	1	0	0											103.436	0.241			-1.03027	0.108993		TCONS_00010337	XLOC_007967
AF454394	ncRNA						BC156072,BC156884,NM_011039,AF254422	AF254422				327	0	0	327	0	1	0	0			2		2	1					25.954	0.079			0.437238	0.0447076		TCONS_00020386	XLOC_015842
AF457567	ncRNA						BC096026,AK084124,NM_145933,BC092222,NM_001252505	BC092222				203	0	0	203	0	1	0	0											9.75	0.048			-1.2539	0.029176		TCONS_00010812	XLOC_008334
AF469670	ncRNA											587	0	101905	102498	3	0.006	0	5.111						1					0.156	0			-0.178888	0.047307		TCONS_00004372	XLOC_003541
AF479022	ncRNA						BC006770,AK131826.1,X02929.1,BC106771.1,BC139214.1,BC139216,AK038154	BC006770				300	0	171	471	1	0.637	0	3.333							uc007tqh.1		TCRA	Mus musculus T-cell receptor alpha chain (TCRA) mRNA, partial cds.	52.763	0.176	TRUE		2.07861	0.165006		TCONS_00008529	XLOC_006502
AF486451	ncRNA											4510	0	210263	214829	9	0.021	0	1.996			2								0	0			2.1934	0.0579321		TCONS_00007830	XLOC_006031
AF494488	ncRNA	TRUE										700	0	0	700	0	1	0	0											241.743	0.345				0.256778	62.65	TCONS_00021846	XLOC_017047
AF498294	ncRNA	TRUE										2644	0	13221	15865	10	0.167	0	3.782	2		6		1	1	uc011ysu.1		Rian	Mus musculus strain Swiss Webster imprinted Irm mRNA, complete sequence.	124.246	0.047		Rian		0.100297		TCONS_00005902	XLOC_004663
AF498302	ncRNA	TRUE										1477	0	11072	12549	7	0.118	0	4.739			6				uc007pbb.2		Rian	Mus musculus strain Swiss Webster imprinted Irm mRNA, complete sequence.	40.752	0.028		Rian	-1.15707	0.0243384		TCONS_00005893	XLOC_004663
AF528066	ncRNA						AB007810,D43796,U11763,AK140095,NM_001077514,AK134609,U75372	NM_001077514				326	0	0	326	0	1	0	0											52.05	0.16			-0.955971	0.0249731		TCONS_00015499	XLOC_011986
AF541962	ncRNA				AB353000	9				NM_009440		2828	0	31857	34685	4	0.082	0	1.414			2								172.305	0.061		Tsix	-1.33444	0.245792		TCONS_00029087	XLOC_022740
AJ001379	ncRNA						Y09222	Y09222				3107	0	0	3107	0	1	0	0			4								67.297	0.022			1.23447	0.0631327		TCONS_00030018	XLOC_023292
AJ236880	ncRNA						BC117979,X56304,BC117980,D90343,NM_011607	NM_011607	AK038610			273	0	0	273	0	1	0	0			1								272.356	0.998				0.0156519		TCONS_00019992	XLOC_015501
AJ250694	ncRNA	TRUE			AK036470	405						358	0	0	358	0	1	0	0			2								9.466	0.026			-1.22013	0.00944667		TCONS_00002871	XLOC_002313
AJ308964	ncRNA								AK038743			1604	0	34264	35868	3	0.045	0	1.87	2				1		uc011yvp.1		AJ308964	Mus musculus mRNA for Bmh1 transcript.	133.08	0.083			-1.0569	0.0747886	-87.7785	TCONS_00006649	XLOC_005186
AJ315977	ncRNA						Y12229,NM_011682,X83506,AK020881	NM_011682				587	0	0	587	0	1	0	0											437.46	0.745			-0.683052	0.00761699		TCONS_00002731	XLOC_002200
AJ409472	ncRNA						AK049228,AK045540,AK167055,NM_175258,BC145503,BC141182,NM_001252496,NM_001252494	AK167055				218	0	0	218	0	1	0	0											47.479	0.218			-1.04831	0.00393564		TCONS_00003689	XLOC_002986
AJ409473	ncRNA	TRUE	DQ700497	64	DQ710579	28			EU523865			367	0	0	367	0	1	0	0			2								21.892	0.06			-1.02556	0.0044268		TCONS_00002045	XLOC_001611
AJ409474	ncRNA						BC148805,BC146384,AK088056,AK163916,AK144214,NM_010918,L04289,BC048414,AK035582	BC146384	AK018360			222	0	0	222	0	1	0	0															-1.14434	0.00110907		TCONS_00027977	XLOC_021832
AJ409475	ncRNA						AK015464,AK149168,BC048086,AK076640,NM_029115,BC060044	BC060044			AK015464,AK076640,AK149168,BC048086,BC060044,NM_029115	226	0	0	226	0	1	0	0											22.405	0.099			-0.962689	0.00134841		TCONS_00000801	XLOC_000576
AJ409476	ncRNA						AF036332,BC057667,AK078118,NM_008702,BC058652	BC058652				216	0	0	216	0	1	0	0											53.977	0.25				0.00443885		TCONS_00004787	XLOC_003848
AJ409481	ncRNA								NM_178675			208	0	0	208	0	1	0	0			1								4.372	0.021			-0.592112	0.00443949		TCONS_00002963	XLOC_002389
AJ409482	ncRNA	TRUE										214	0	0	214	0	1	0	0											4.731	0.022			-0.557047	0.00443901		TCONS_00003840	XLOC_003116
AJ409486	ncRNA								BC017596			202	0	0	202	0	1	0	0											1.177	0.006			-0.958299	0.0272428		TCONS_00020167	XLOC_015655
AJ409489	ncRNA		AK086284	-248					NM_028448	NM_001039536		274	0	0	274	0	1	0	0			1								7.905	0.029			-1.22101	0.0160043		TCONS_00003748	XLOC_003036
AJ409494	ncRNA	TRUE										246	0	0	246	0	1	0	0											8.406	0.034			-0.970744	0.00171974		TCONS_00017332	XLOC_013396
AJ409501	ncRNA	TRUE							AK015737			354	0	0	354	0	1	0	0			2												-0.648189	0.00368802		TCONS_00017559	XLOC_013585
AJ409502	ncRNA						NM_173783,AK046641	AK046641				205	0	0	205	0	1	0	0											6.894	0.034			-1.18028	0.00612237		TCONS_00029723	XLOC_023108
AJ409505	ncRNA						AK151148,AK151306,NM_198631,BC057627	AK151306				299	0	0	299	0	1	0	0			2								59.64	0.199			-0.921497	0.0155906		TCONS_00024191	XLOC_018895
AK002250	ncRNA	TRUE										535	0	2481	3016	1	0.177	0	1.869					1		uc007gwq.1		AK002250	Mus musculus adult male kidney cDNA, RIKEN full-length enriched library, clone:0610006I13 product:unclassifiable, full insert sequence.	2.134	0.004			-1.10128	0.0489174		TCONS_00003224	XLOC_002596
AK002255	ncRNA	TRUE										1589	0	28607	30196	2	0.053	0	1.259			2		1	1					216.365	0.136			0.817815	0.0609041	-161.151	TCONS_00025318	XLOC_019748
AK002391	ncRNA								AY940728			460	0	0	460	0	1	0	0											91.911	0.2			-1.06258	0.0161735	-407.678	TCONS_00011245	XLOC_008673
AK002417	ncRNA	TRUE										546	0	58340	58886	2	0.009	0	3.663					1	1	uc008sat.1		AK002417	Mus musculus adult male kidney cDNA, RIKEN full-length enriched library, clone:0610009K14 product:unclassifiable, full insert sequence.	4.134	0.008			-0.863711	0.0647994		TCONS_00019772	XLOC_015310
AK002586	ncRNA								AK153704	NM_029298		531	0	1693	2224	1	0.239	0	1.883											50.748	0.096			-1.09599	0.0296112	-251.776	TCONS_00012858	XLOC_009969
AK002663	ncRNA	TRUE										757	0	9637	10394	2	0.073	0	2.642			1		1		uc008ttz.1		AK002663	Mus musculus adult male kidney cDNA, RIKEN full-length enriched library, clone:0610025J13 product:hypothetical protein, full insert sequence.	193.077	0.255			0.985546	0.0744643	-309.845	TCONS_00019296	XLOC_014908
AK002733	ncRNA											826	0	28123	28949	2	0.029	0	2.421							uc008rnc.1		AK002733	Mus musculus adult male kidney cDNA, RIKEN full-length enriched library, clone:0610031O16 product:unclassifiable, full insert sequence.	30.689	0.037				0.0191059		TCONS_00018809	XLOC_014507
AK002748	ncRNA	TRUE										1102	0	152	1254	1	0.879	0	0.907			2		1	1	uc009bxj.1		AK002748	Mus musculus adult male kidney cDNA, RIKEN full-length enriched library, clone:0610033M10 product:unclassifiable, full insert sequence.	45.723	0.041			-1.12032	0.0462533		TCONS_00023535	XLOC_018349
AK002817	ncRNA		AK169276	388						AK029262		716	0	1921	2637	1	0.272	0	1.397			1								82.035	0.115			-1.40833	0.0128762		TCONS_00015888	XLOC_012277
AK002838	ncRNA				AK086857	976			BC111809			730	0	3446	4176	2	0.175	0	2.74					1	1	uc007kvp.1		AK002838	Mus musculus adult male kidney cDNA, RIKEN full-length enriched library, clone:0610039H22 product:unclassifiable, full insert sequence.	151.609	0.208			-0.999458	0.0640033	-31.7167	TCONS_00003967	XLOC_003218
AK002857	ncRNA		BC152921	483							BC152921,NM_001081060	1169	0	0	1171	0	1	0	0					1						248.603	0.213			-0.571141	0.132972		TCONS_00008014	XLOC_006091
AK002860	ncRNA				X06762	710				AK138519		584	0	15291	15875	2	0.037	0	3.425			3		2	4	uc007lbs.1		AK002860	Mus musculus adult male kidney cDNA, RIKEN full-length enriched library, clone:0610040B09 product:unclassifiable, full insert sequence.	258.856	0.443			-1.03913	0.119321	-126.388	TCONS_00004935	XLOC_003977
AK002901	ncRNA		AK002902	-245	NM_172762	695					AK002902,AK141367,AK160168,BC002087,BC099449,NM_024214	391	0	0	391	0	1	0	0			1								33.939	0.087			-1.23962	0.0228798		TCONS_00026527	XLOC_020610
AK002906	ncRNA								AK004775			2552	0	0	2552	0	1	0	0			3		1						296.382	0.116			-1.25225	0.0373315	-37.0685	TCONS_00016859	XLOC_013046
AK002931	ncRNA								NM_001146292			1345	0	4033	5378	1	0.25	0	0.743			1		1						96.603	0.072			-1.16599	0.017717		TCONS_00013028	XLOC_010115
AK002941	ncRNA	TRUE	AK087881	-12							AK029578,AK052664,AK087881,AK153973,BC057897,NM_027060,NM_172618	1130	0	0	1130	0	1	0	0			2								120.216	0.106			-1.36593	0.0842286	-172.69	TCONS_00012010	XLOC_009311
AK002968	ncRNA	TRUE										316	0	0	316	0	1	0	0											24.829	0.079			-0.902814	0.0828284		TCONS_00011730	XLOC_009097
AK003015	ncRNA						AK013879,AK170273,AK082765,AK034579,NM_001163532,NM_001163531,BC005542,NM_028223	NM_001163531				274	0	0	274	0	1	0	0					1						0.313	0.001			-1.3372	0.00359891		TCONS_00021079	XLOC_016405
AK003069	ncRNA	TRUE										243	0	0	243	0	1	0	0			1								7.748	0.032			-1.1092	0.011582		TCONS_00019144	XLOC_014784
AK003073	ncRNA				BC030048	451	AK161228	AK161228		AK134269		339	0	388	727	2	0.466	0	5.9					1	1	uc008cem.2		1110038B12Rik	Mus musculus adult male kidney cDNA, RIKEN full-length enriched library, clone:0610009C20 product:unclassifiable, full insert sequence.	13.58	0.04	TRUE		-0.925006	0.0510629	-30.2498	TCONS_00012498	XLOC_009716
AK003103	ncRNA		Guttman10_novel_lincs_TCONS_00002255	-124					Guttman10_novel_lincs_TCONS_00002104			589	0	299	888	1	0.663	0	1.698					1		uc008ypm.1		AK003103	Mus musculus adult male heart cDNA, RIKEN full-length enriched library, clone:1010001B22 product:unclassifiable, full insert sequence.	9.356	0.016	TRUE		-1.13473	0.0257519		TCONS_00021994	XLOC_017161
AK003173	ncRNA								M10062			672	0	18225	18897	1	0.036	0	1.488			3		1	1					83.526	0.124			-1.21875	0.0721369		TCONS_00010238	XLOC_007875
AK003212	ncRNA		NM_172704	-868							AK053156,AK089983,AK156793,AK171781,AK172542,BC075619,BC079852,BC085257,NM_172704	474	0	0	474	0	1	0	0			1		1	1					116.225	0.245			-0.928155	0.00828719	-61.0505	TCONS_00020458	XLOC_015901
AK003247	ncRNA						NM_010754,AK007817,BC021342,NM_001252481,BC089184,AY334552,U60530,AF005743	BC021342	BC030003			960	0	0	960	0	1	0	0											11.264	0.012			-0.381835	0.0602682		TCONS_00013403	XLOC_010401
AK003290	ncRNA	TRUE										1795	0	0	1795	0	1	0	0			3			1					608.134	0.339			-1.16162	0.0499305	-366.062	TCONS_00017902	XLOC_013862
AK003304	ncRNA	TRUE										388	0	1716	2104	1	0.184	0	2.577					2	3					3.131	0.008			-1.14111	0.0649628		TCONS_00003047	XLOC_002456
AK003327	ncRNA	TRUE										566	0	709	1275	1	0.444	0	1.767					1	1	uc007apm.1		AK003327	Mus musculus 18-day embryo whole body cDNA, RIKEN full-length enriched library, clone:1110002O04 product:unclassifiable, full insert sequence.	77.273	0.137			-1.08052	0.042914	-55.7057	TCONS_00000099	XLOC_000092
AK003348	ncRNA						AK076996,BC137644,BC125429,AK017032,NM_029408	AK076996				505	0	0	505	0	1	0	0			2								4.234	0.008				0.0220669		TCONS_00021187	XLOC_016492
AK003349	ncRNA									AF091047		1237	0	37	1278	1	0.971	0	0.808	2		4		1						75.93	0.061			-1.20921	0.0133074		TCONS_00012331	XLOC_009590
AK003351	ncRNA						AB057731,AK049548,BC002141,AK048744,AK031851,NM_024471,AK045167,AK077192	AK077192				767	0	0	767	0	1	0	0			2								80.72	0.105			-0.0239352	0.0142933		TCONS_00020835	XLOC_016194
AK003437	ncRNA						BC019181,AB105178,NM_138755,NM_001109691,AK037174,AK129424,AK137085,NM_001109690,AK152359	NM_138755				1052	0	0	1052	0	1	0	0			2								143.678	0.137				0.0499349		TCONS_00015443	XLOC_011936
AK003491	ncRNA		NR_037232.1	-401					EU434913		NR_037232.1	1292	0	0	1292	0	1	0	0			2								127.123	0.098			-1.00579	0.022967	-338.414	TCONS_00005789	XLOC_004661
AK003497	ncRNA		AK030713	-931					NM_001025559			420	0	152	572	1	0.734	0	2.381											152.738	0.364				0.0817226		TCONS_00024726	XLOC_019330
AK003532	ncRNA	TRUE										920	0	0	920	0	1	0	0			3								113.612	0.123	TRUE		-1.06723	0.0431837	-67.2431	TCONS_00019479	XLOC_015062
AK003662	ncRNA									Guttman10_novel_lincs_TCONS_00001200	AF085348,AK002595,AK050159,AK088916,AK132139,AK137246,AK145398,AK146970,AK151730,AK152511,BC014808,BC083347,NM_011873	668	0	0	669	0	1	0	0						1					27.263	0.041			-1.01432	0.199505	-7.1477	TCONS_00010629	XLOC_008191
AK003663	ncRNA	TRUE							AK034258			651	0	462	1113	1	0.585	0	1.536					1	2	uc009nnl.1		AK003663	Mus musculus 18-day embryo whole body cDNA, RIKEN full-length enriched library, clone:1110013I04 product:unclassifiable, full insert sequence.	11.534	0.018			-1.19234	0.0173283		TCONS_00026280	XLOC_020524
AK003692	ncRNA						AK135463,AK004751,BC012211,NM_016862,BC089321,AK148281,AK028646,AF035823,AF035209,BC019386	BC019386				553	0	0	553	0	1	0	0					1	1					26.724	0.048			-0.970095	0.072953		TCONS_00014297	XLOC_011056
AK003710	ncRNA									AF111101		1620	0	0	1620	0	1	0	0			2			1					286.352	0.177			-0.734155	0.108699	-48.8354	TCONS_00024918	XLOC_019477
AK003718	ncRNA									NM_001136065		1273	0	0	1273	0	1	0	0	1		3		1						914.845	0.719			-1.19345	0.0396531	-229.429	TCONS_00023455	XLOC_018283
AK003775	ncRNA											1133	0	0	1133	0	1	0	0	2		4		1						540.771	0.477			-1.2666	0.0058762		TCONS_00017901	XLOC_013861
AK003805	ncRNA	TRUE										1973	0	0	1973	0	1	0	0			2								171.189	0.087			-0.665837	0.598832		TCONS_00003223	XLOC_002596
AK003907	ncRNA		AK144432	-221						NM_029570		499	0	0	499	0	1	0	0			2		1	1					0	0			-1.09542	0.00512716		TCONS_00017402	XLOC_013453
AK003925	ncRNA		AK140331	-322							AK042627,AK140331,BC144976,BC150681,NM_177821	855	0	0	855	0	1	0	0	1				1	1					76.709	0.09			-1.12592	0.0295742	-94.7192	TCONS_00010502	XLOC_008092
AK003932	ncRNA		BC147227	-919	AK039340	438			AK043630	AK179515		1324	0	0	1324	0	1	0	0	2		4		1	1					336.527	0.254			-1.10464	0.0322629	-75.7645	TCONS_00025100	XLOC_019634
AK003943	ncRNA						NM_172448,AK153638,BC011216,AK028750	AK153638	M30250.2			834	0	3099	3933	1	0.212	0	1.199			1		1	1	uc007kuh.1		AK003943	Mus musculus 18-day embryo whole body cDNA, RIKEN full-length enriched library, clone:1110028F11 product:unclassifiable, full insert sequence.	92.92	0.111			-0.58866	0.0632271		TCONS_00003954	XLOC_003206
AK003962	ncRNA									NM_153178		676	0	0	676	0	1	0	0					3	3					426.141	0.63			-1.26361	0.0476083		TCONS_00010401	XLOC_008018
AK003987	ncRNA									AK082872		649	0	0	649	0	1	0	0											183.648	0.283			-0.695242	0.147727	-455.939	TCONS_00012111	XLOC_009397
AK004038	ncRNA	TRUE							AK050668			384	0	0	384	0	1	0	0					1						14.527	0.038			-1.42821	0.0238092		TCONS_00024773	XLOC_019369
AK004108	ncRNA						AK052632,AK172011,AK045123,AK134022,AF200687,AF453571,AY050663,AF369980,NM_133957,NM_018823,AF162853	AK045123				1361	0	0	1361	0	1	0	0			3								243.864	0.179			-0.170934	0.0596984	-19.992	TCONS_00026233	XLOC_020489
AK004128	ncRNA									NM_145099		617	0	0	617	0	1	0	0			4		1						167.816	0.272			-1.12088	0.0171895		TCONS_00003813	XLOC_003091
AK004221	ncRNA	TRUE										1092	0	519	1611	2	0.678	0	1.832					1	2	uc009nrm.1		AK004221	Mus musculus 18-day embryo whole body cDNA, RIKEN full-length enriched library, clone:1110050K14 product:unclassifiable, full insert sequence.	10.677	0.01			-1.02265	0.149619		TCONS_00027204	XLOC_021182
AK004223	ncRNA								AK080294	AK081715		1369	0	0	1369	0	1	0	0	1		2		1						241.48	0.176			-1.07823	0.0467931		TCONS_00028296	XLOC_022088
AK004240	ncRNA									NM_029508		511	0	0	511	0	1	0	0	1		2		1						462.85	0.906			-1.28934	0.00400752		TCONS_00014170	XLOC_010954
AK004262	ncRNA				X94478	5			BC026055	NM_001085440		934	0	0	934	0	1	0	0			1		1	2					33.387	0.036			0.0806725	0.00572723		TCONS_00003728	XLOC_003021
AK004273	ncRNA									AK129015		851	0	55	906	1	0.939	0	1.175			1		1						283.684	0.333			-0.952055	0.0609151	-148.529	TCONS_00020396	XLOC_015849
AK004294	ncRNA								BC058100			667	0	144	811	1	0.822	0	1.499			2		1	2					14.032	0.021			-0.702301	0.0476275		TCONS_00012639	XLOC_009832
AK004302	ncRNA				AK019871	-87	AK044883	AK044883	AK014823	AK194488		1145	0	0	1149	0	1	0	0			3		1	1					127.324	0.111			-1.10124	0.0563859		TCONS_00014378	XLOC_011124
AK004326	ncRNA									NM_001170746		499	0	0	499	0	1	0	0					1						97.158	0.195			-1.11035	0.0238502		TCONS_00020595	XLOC_016016
AK004333	ncRNA	TRUE										580	0	0	580	0	1	0	0	1				1						52.712	0.091		Snhg4	-1.25927	0.00416963		TCONS_00013103	XLOC_010167
AK004365	ncRNA										AB035322,AK028955,AK045539,BC024599,NM_145144	535	0	0	535	0	1	0	0	1				1	2					96.212	0.18			-1.35222	0.028936		TCONS_00015064	XLOC_011633
AK004374	ncRNA	TRUE										982	0	0	983	0	1	0	0			1		1						31.16	0.032			-1.10077	0.0562498	-22.6827	TCONS_00029193	XLOC_022809
AK004391	ncRNA						AK003139,BC030079,NM_001145433	NM_001145433				874	0	0	874	0	1	0	0			1								18.185	0.021				0.0337047	-50.6942	TCONS_00020791	XLOC_016163
AK004418	ncRNA						BC158045,NM_080451,AK079194	NM_080451				1181	0	0	1181	0	1	0	0			2		1						403.572	0.342			-0.962675	0.0337136	-384.869	TCONS_00018714	XLOC_014436
AK004434	ncRNA		NM_026451	-106			NM_175173,AK077050	AK077050				1881	0	3354	5235	1	0.359	0	0.532			6			1	uc008ane.1		AK004434	Mus musculus adult male kidney cDNA, RIKEN full-length enriched library, clone:0610012K18 product:unclassifiable, full insert sequence.	283.34	0.151			-1.08218	0.0330721	16.6358	TCONS_00012355	XLOC_009610
AK004445	ncRNA									AF513708		900	0	0	901	0	1	0	0			3		2	2					167.084	0.186			-1.23325	0.0154355		TCONS_00022792	XLOC_017759
AK004455	ncRNA								BC055109	NM_011070		848	0	0	849	0	1	0	0			2		1	1					183.319	0.216			-1.07702	0.0124248		TCONS_00000839	XLOC_000605
AK004537	ncRNA		DQ646377	-288					AK193147			996	0	2423	3419	1	0.291	0	1.004			1		1						80.777	0.081			-0.589825	0.0111285		TCONS_00015964	XLOC_012340
AK004571	ncRNA	TRUE										3293	0	0	3293	0	1	0	0			3		1	1									1.85693	0.0968053		TCONS_00009050	XLOC_006929
AK004581	ncRNA								NM_001164488	NM_001012310		3942	0	0	3942	0	1	0	0			2		1						553.319	0.14			-1.00889	0.113967		TCONS_00005759	XLOC_004652
AK004585	ncRNA		NR_035459	54								1366	0	1115	2481	1	0.551	0	0.732					2	2	uc007nkz.1		AK004585	Mus musculus adult male lung cDNA, RIKEN full-length enriched library, clone:1200003N10 product:hypothetical protein, full insert sequence.	468.04	0.343			4.08424	0.345183	-106.48	TCONS_00005366	XLOC_004320
AK004627	ncRNA	TRUE										2453	0	3499	5954	1	0.412	0	0.408					1	3					254.133	0.104			-0.907411	0.088398	30.1309	TCONS_00017137	XLOC_013255
AK004796	ncRNA	TRUE							AK077035			3220	0	0	3229	0	1	0	0			3		1											0.0260838		TCONS_00013932	XLOC_010811
AK004850	ncRNA	TRUE										3535	0	8242	11777	4	0.3	0	1.132	1		5		1	1	uc007yro.1		AK004850	Mus musculus adult male liver cDNA, RIKEN full-length enriched library, clone:1300002E11 product:unclassifiable, full insert sequence.	443.26	0.125	TRUE		0.520106	0.021644		TCONS_00010800	XLOC_008324
AK005005	ncRNA	TRUE							BC027227			3203	0	0	3204	0	1	0	0			7			1					241.357	0.075			-1.17774	0.0262571	-55.7284	TCONS_00005569	XLOC_004488
AK005115	ncRNA		Guttman10_novel_lincs_TCONS_00002512	172								1059	0	40820	41879	2	0.025	0	1.889			1			1	uc009kct.1		AK005115	Mus musculus adult male cerebellum cDNA, RIKEN full-length enriched library, clone:1500002F19 product:weakly similar to 60S RIBOSOMAL PROTEIN L37 (G1.16) [Homo sapiens], full insert sequence.	250.258	0.236			0.257358	0.110724	-58.7093	TCONS_00025631	XLOC_020008
AK005117	ncRNA									BC080270		1065	0	0	1065	0	1	0	0			1								19.103	0.018	TRUE			0.0377013		TCONS_00014084	XLOC_010886
AK005119	ncRNA		Guttman10_novel_lincs_TCONS_00002904	-133							AK017458,AK081462,AK083512,BC151050,BC157941,BC172104,BC172139	752	0	0	753	0	1	0	0			1		1	2					8.72	0.012			-1.35225	0.0343153		TCONS_00026113	XLOC_020397
AK005156	ncRNA						NM_027808,AK018401	NM_027808				2394	0	0	2394	0	1	0	0			4		1	2					118.697	0.05			-1.21109	0.0506173	-78.6389	TCONS_00018743	XLOC_014459
AK005173	ncRNA						BC116392,AK011850,NM_025998,EF058048,AK011164,BC116391	AK011164				758	0	0	758	0	1	0	0					1	1					66.215	0.087			-1.03407	0.0252011		TCONS_00019541	XLOC_015109
AK005238	ncRNA						AK031929	AK031929				658	0	0	659	0	1	0	0	1		2		1	1					396.298	0.602			-1.22794	0.00715832		TCONS_00013926	XLOC_010806
AK005260	ncRNA						BC049852,AK155375,AK168757,AK168541,AK146894,NM_026605,AK155093,AK165591,AK019497	AK155093			AK007257	636	0	0	636	0	1	0	0					1						81.944	0.129			-0.78538	0.0612684	-22.9648	TCONS_00024208	XLOC_018908
AK005275	ncRNA									BC054739		973	0	90617	91590	4	0.011	0	4.111			1		1	2	uc008hhq.1		1500017E21Rik	Mus musculus adult male cerebellum cDNA, RIKEN full-length enriched library, clone:1500017E21 product:unclassifiable, full insert sequence.	187.573	0.193			-0.145279	0.0723906		TCONS_00014657	XLOC_011319
AK005363	ncRNA								AK134078			859	0	11462	12321	1	0.07	0	1.164			3		1	1	uc008wsp.1		AK005363	Mus musculus adult male cerebellum cDNA, RIKEN full-length enriched library, clone:1500035N22 product:hypothetical protein, full insert sequence.	54.962	0.064			4.25702	0.128673		TCONS_00020633	XLOC_016039
AK005366	ncRNA						BC156585,BC152824,NM_001081292,BC078445,BC028668,AK053830	BC078445	BC042662			851	0	0	851	0	1	0	0			1								136.493	0.16			-1.09641	0.0381356		TCONS_00024988	XLOC_019539
AK005410	ncRNA		BC055035	-105							AF411213,AK002633,BC055035,NM_026496	1342	0	0	1342	0	1	0	0			3			1	uc011zsf.1		AK005410	Mus musculus adult female placenta cDNA, RIKEN full-length enriched library, clone:1600010A02 product:unclassifiable, full insert sequence.	535.129	0.399				0.0295908	-325.936	TCONS_00010225	XLOC_007863
AK005418	ncRNA											1239	0	151587	152826	3	0.008	0	2.421			3				uc009jes.1		AK005418	Mus musculus adult female placenta cDNA, RIKEN full-length enriched library, clone:1600010M07 product:unclassifiable, full insert sequence.	100.388	0.081			-1.08952	0.0272315		TCONS_00025469	XLOC_019876
AK005466	ncRNA	TRUE										348	0	0	348	0	1	0	0			1		1						85.913	0.247			-1.07393	0.0440045		TCONS_00004135	XLOC_003354
AK005480	ncRNA									BC150832		335	0	275608	275959	3	0.001	0	8.955						1					5.207	0.016			-1.02363	0.128643		TCONS_00014052	XLOC_010865
AK005483	ncRNA								NM_017374	AK011496		1878	0	0	1878	0	1	0	0			2		1	1					383.322	0.204			-0.576578	0.140526		TCONS_00026705	XLOC_020758
AK005516	ncRNA									AJ012072		1562	0	35888	37450	3	0.042	0	1.921			2		2	1					9.784	0.006			-0.109431	0.130256		TCONS_00012196	XLOC_009470
AK005538	ncRNA		NM_001098230	-114								535	0	27181	27716	1	0.019	0	1.869					1		uc008sad.1		AK005538	Mus musculus adult female placenta cDNA, RIKEN full-length enriched library, clone:1600025K15 product:unclassifiable, full insert sequence.	71.59	0.134			-1.10305	0.141888		TCONS_00018945	XLOC_014616
AK005548	ncRNA	TRUE										489	0	3168	3657	2	0.134	0	4.09					1	1					85.902	0.176			1.36492	0.0714222	-65.1827	TCONS_00027114	XLOC_021105
AK005575	ncRNA		AK051976	-86					BC054785			242	0	0	242	0	1	0	0					1	1					68.212	0.282			-1.13524	0.0159924		TCONS_00012029	XLOC_009326
AK005578	ncRNA	TRUE	AK006348	-66								594	0	1854	2448	2	0.243	0	3.367					1	1	uc009jnt.1		AK005578	Mus musculus adult male testis cDNA, RIKEN full-length enriched library, clone:1700001C18 product:unclassifiable, full insert sequence.	99.901	0.168	TRUE		-1.10333	0.0827784		TCONS_00025540	XLOC_019930
AK005589	ncRNA	TRUE										611	0	25826	26437	4	0.023	0	6.547			1			1	uc008edy.1		AK005589	Mus musculus adult male testis cDNA, RIKEN full-length enriched library, clone:1700001G01 product:unclassifiable, full insert sequence.	13.235	0.022			2.60069	0.120751		TCONS_00012984	XLOC_010079
AK005595	ncRNA								NM_001033385			374	0	22173	22547	1	0.017	0	2.674			1								11.342	0.03			-0.802035	0.0790771		TCONS_00002222	XLOC_001769
AK005598	ncRNA	TRUE										743	0	596	1339	2	0.555	0	2.692			1			1					115.593	0.156			-0.982574	0.115337	-225.762	TCONS_00005101	XLOC_004110
AK005600	ncRNA	TRUE										956	0	32289	33245	4	0.029	0	4.184			2		1		uc008wti.2		4930584F24Rik	Mus musculus adult male testis cDNA, RIKEN full-length enriched library, clone:1700001J09 product:unclassifiable, full insert sequence.	70.095	0.073			2.44611	0.0706894		TCONS_00021544	XLOC_016791
AK005614	ncRNA	TRUE										482	0	1650	2132	1	0.226	0	2.075			1		1	1					248.536	0.516			2.01353	0.0787485	-392.357	TCONS_00017951	XLOC_013899
AK005623	ncRNA		AK187579	210	AK194063	-769			NM_178690	BC066035		502	0	0	502	0	1	0	0					1						164.744	0.328			-0.809537	0.0759284	-56.06	TCONS_00001565	XLOC_001214
AK005629	ncRNA	TRUE										743	0	8684	9427	5	0.079	0	6.729			1			1	uc007rct.1		AK005629	Mus musculus adult male testis cDNA, RIKEN full-length enriched library, clone:1700003E18 product:unclassifiable, full insert sequence.	11.303	0.015			-0.885405	0.066225	-16.4392	TCONS_00007998	XLOC_006080
AK005642	ncRNA	TRUE										1057	0	15033	16091	1	0.066	0	0.946						1					86.474	0.082			-1.2675	0.0170058		TCONS_00024138	XLOC_018848
AK005643	ncRNA	TRUE										424	0	802	1226	1	0.346	0	2.358					1	3	uc007baq.1		AK005643	Mus musculus adult male testis cDNA, RIKEN full-length enriched library, clone:1700003I22 product:unclassifiable, full insert sequence.	134.997	0.318			-0.735059	0.125794	-116.458	TCONS_00000206	XLOC_000175
AK005648	ncRNA	TRUE										420	0	0	420	0	1	0	0											1.495	0.004			-1.17622	0.00613917		TCONS_00008659	XLOC_006611
AK005652	ncRNA	TRUE							NR_033512			674	0	0	674	0	1	0	0			1								468.824	0.696			-0.793875	0.367936		TCONS_00017278	XLOC_013353
AK005657	ncRNA	TRUE										1083	0	31468	32551	3	0.033	0	2.77			2		1		uc007ryt.1		AK005657	Mus musculus adult male testis cDNA, RIKEN full-length enriched library, clone:1700003P14 product:unclassifiable, full insert sequence.	73.013	0.067			-1.23981	0.0319937		TCONS_00007476	XLOC_005748
AK005667	ncRNA								AK142416			324	0	46440	46764	2	0.007	0	6.173					2	4	uc009ijo.1		AK005667	Mus musculus adult male testis cDNA, RIKEN full-length enriched library, clone:1700006D18 product:unclassifiable, full insert sequence.	46.398	0.143			-0.934944	0.0825735		TCONS_00025404	XLOC_019819
AK005676	ncRNA	TRUE										603	0	1695	2298	1	0.262	0	1.658											17.15	0.028			-1.01347	0.0130128		TCONS_00018806	XLOC_014504
AK005677	ncRNA	TRUE										623	0	4150	4773	2	0.131	0	3.21			1				uc007run.1		AK005677	Mus musculus adult male testis cDNA, RIKEN full-length enriched library, clone:1700006H21 product:unclassifiable, full insert sequence.	45.945	0.074			-0.978919	0.0686042		TCONS_00007373	XLOC_005669
AK005683	ncRNA								AK003506	AK082983		486	0	853	1339	1	0.363	0	2.058					1						125.693	0.259			-0.399889	0.0714264	-155.072	TCONS_00013733	XLOC_010660
AK005685	ncRNA	TRUE										409	0	0	409	0	1	0	0			2								47.882	0.117			-1.2575	0.0326538		TCONS_00001624	XLOC_001265
AK005686	ncRNA								AK005531			893	0	26069	26962	5	0.033	0	5.599	1		2			2	uc009jhr.1		AK005686	Mus musculus adult male testis cDNA, RIKEN full-length enriched library, clone:1700006P19 product:unclassifiable, full insert sequence.	206.096	0.231			-0.987932	0.0424732		TCONS_00025503	XLOC_019902
AK005701	ncRNA	TRUE										1513	0	0	1513	0	1	0	0	1		6		1	1					0	0				0.223023		TCONS_00011436	XLOC_008844
AK005712	ncRNA		AK006024.5	-22					BC055874.2			696	0	150326	151022	2	0.005	0	2.874					1		uc007sdq.1		AK005712	Mus musculus adult male testis cDNA, RIKEN full-length enriched library, clone:1700007H14 product:unclassifiable, full insert sequence.	6.089	0.009			0.546582	0.104957		TCONS_00008310	XLOC_006313
AK005715	ncRNA	TRUE										537	0	10836	11373	1	0.047	0	1.862					1						21.789	0.041			-1.00584	0.0795758		TCONS_00011701	XLOC_009073
AK005721	ncRNA								AB059554			881	0	1036	1918	1	0.46	0	1.135			1								132.255	0.15				0.0611061	-84.7122	TCONS_00014925	XLOC_011529
AK005727	ncRNA						AK132263,BC043296,BC096618,AK052045,AK042154,BC090644,NM_177345,AK027932,BC031579,BC027377	AK132263				928	0	0	929	0	1	0	0			1		1						120.4	0.13			-0.946376	0.137118		TCONS_00015087	XLOC_011651
AK005733	ncRNA								AK153704			738	0	1551	2289	1	0.322	0	1.355			1			1					145.508	0.197			-1.07641	0.129642	-172.03	TCONS_00012857	XLOC_009968
AK005735	ncRNA	TRUE										435	0	4548	4983	1	0.087	0	2.299											42.094	0.097			-1.23757	0.00734466		TCONS_00016005	XLOC_012367
AK005737	ncRNA	TRUE			BC059216	484			AK086675			682	0	0	682	0	1	0	0			1		1	1					25.842	0.038			-1.27386	0.0465846		TCONS_00010861	XLOC_008371
AK005738	ncRNA											776	0	12611	13387	6	0.058	0	7.732							uc007mwk.1		1700012B15Rik	Mus musculus adult male testis cDNA, RIKEN full-length enriched library, clone:1700007N07 product:hypothetical protein, full insert sequence.	169.694	0.219			1.45224	0.199086		TCONS_00005190	XLOC_004172
AK005742	ncRNA								BC065118	BC125341		1247	0	0	1247	0	1	0	0											581.286	0.466			-1.10923	0.0438517		TCONS_00026012	XLOC_020315
AK005750	ncRNA									AK165685		704	0	0	704	0	1	0	0			3		1	2					46.773	0.066			-1.18612	0.035571	-50.7267	TCONS_00009468	XLOC_007260
AK005751	ncRNA								NM_177775	NM_023873		691	0	0	691	0	1	0	0					1	1					13.486	0.02				0.0725407	-211.204	TCONS_00027818	XLOC_021698
AK005752	ncRNA								AK156499	AF041472	AK171128	605	0	0	605	0	1	0	0					1						8.05	0.013			-0.949902	0.0433836		TCONS_00021205	XLOC_016506
AK005754	ncRNA								AK189423	AK162841		447	0	811	1258	1	0.355	0	2.237							uc007jjp.1		AK005754	Mus musculus adult male testis cDNA, RIKEN full-length enriched library, clone:1700008B19 product:unclassifiable, full insert sequence.	46.152	0.103			-1.02703	0.0490821		TCONS_00003753	XLOC_003038
AK005755	ncRNA	TRUE	AK131776	-282								799	0	56589	57388	4	0.014	0	5.006			1			1					21.649	0.027			0.0187673	0.107973		TCONS_00005410	XLOC_004358
AK005763	ncRNA		AK147629	-107							AF269151,AK075807,AK147380,AK147629,AK220279,NM_133352	919	0	0	919	0	1	0	0											59.507	0.065			-1.21771	0.052996	-41.0778	TCONS_00014197	XLOC_010978
AK005767	ncRNA	TRUE										1684	0	0	1684	0	1	0	0			2		1						48.228	0.029			2.60542	0.166696		TCONS_00021835	XLOC_017036
AK005782	ncRNA		NR_033590	16								626	0	133	759	1	0.825	0	1.597			1		1	1					16.153	0.026			-1.20344	0.0357066		TCONS_00025839	XLOC_020175
AK005783	ncRNA	TRUE										1251	0	0	1251	0	1	0	0			1		1	1					66.628	0.053			-1.27363	0.0307655		TCONS_00016797	XLOC_012994
AK005785	ncRNA								BC156654			330	0	0	330	0	1	0	0											19.081	0.058			-1.07036	0.01461		TCONS_00006475	XLOC_005122
AK005792	ncRNA	TRUE										788	0	9549	10337	5	0.076	0	6.345							uc012ens.1		AK005792	Mus musculus adult male testis cDNA, RIKEN full-length enriched library, clone:1700009C05 product:unclassifiable, full insert sequence.	100.593	0.128			2.98031	0.0293707	-99.462	TCONS_00023657	XLOC_018450
AK005793	ncRNA	TRUE	AK090343	-204								430	0	3202	3632	2	0.118	0	4.651						2	uc007vgq.1		AK005793	Mus musculus adult male testis cDNA, RIKEN full-length enriched library, clone:1700009D01 product:unclassifiable, full insert sequence.	59.966	0.139			-1.16977	0.00578967		TCONS_00009552	XLOC_007334
AK005798	ncRNA	TRUE										1012	0	0	1025	0	1	0	0			2								6.79	0.007			4.63867	0.365536		TCONS_00019759	XLOC_015299
AK005805	ncRNA		AK008585	205					AK202125	AK007076	AB041605,AF211859,AK007552,AK008585,AK029033,AK044204,AK048244,AK138938,AK156037,AK169857,AY337018,BC023747,BC132295,NM_207678	811	0	0	811	0	1	0	0					1						246.453	0.304			6.18346	0.343152		TCONS_00020494	XLOC_015925
AK005812	ncRNA		CT010403	349							AF276981,AK004451,AK004705,BC049580,BC050935,CT010403,NM_025427	888	0	0	888	0	1	0	0			1		1	1					192.111	0.216				0.230155	93.139	TCONS_00008708	XLOC_006653
AK005824	ncRNA								AF075462			683	0	897	1580	1	0.432	0	1.464											14.497	0.021			-1.03639	0.086498	-177.547	TCONS_00009820	XLOC_007532
AK005835	ncRNA		NM_001102670	-274								427	0	3188	3615	1	0.118	0	2.342			1								176.571	0.414			-0.807514	0.0574406	-243.376	TCONS_00023806	XLOC_018563
AK005839	ncRNA		NM_011967	60								224	0	7851	8075	1	0.028	0	4.464					1		uc008qyp.1		AK005839	Mus musculus adult male testis cDNA, RIKEN full-length enriched library, clone:1700010K24 product:unclassifiable, full insert sequence.	2.647	0.012			-1.33929	0.0211689		TCONS_00018641	XLOC_014385
AK005840	ncRNA	TRUE							AK076849			784	0	2810	3596	3	0.219	0	3.827			1		1						31.989	0.041			1.98677	0.0389863		TCONS_00024520	XLOC_019155
AK005844	ncRNA	TRUE							AK139076			524	0	12869	13393	1	0.039	0	1.908			2			1					44.683	0.085			-0.899239	0.0533655		TCONS_00002776	XLOC_002228
AK005849	ncRNA	TRUE										1482	0	62369	63851	6	0.023	0	4.049			2		1	1	uc009gkw.1		AK005849	Mus musculus adult male testis cDNA, RIKEN full-length enriched library, clone:1700010N08 product:unclassifiable, full insert sequence.	77.612	0.052			1.37061	0.0773684		TCONS_00024309	XLOC_018990
AK005857	ncRNA	TRUE										363	0	65780	66143	2	0.005	0	5.51			1		1						224.671	0.619			-1.06227	0.148591		TCONS_00024439	XLOC_019100
AK005859	ncRNA	TRUE	AK011666	-17							AK011666,BC031930,NM_029585	270	0	0	270	0	1	0	0					1						23.707	0.088			-1.25164	0.0587043		TCONS_00024474	XLOC_019129
AK005875	ncRNA	TRUE										603	0	1397	2006	1	0.304	0	1.658											19.386	0.032			-0.990802	0.0124866		TCONS_00026783	XLOC_020829
AK005891	ncRNA	TRUE										1386	0	1936	3322	3	0.417	0	2.165							uc007mwg.2		1700012B15Rik	Mus musculus adult male testis cDNA, RIKEN full-length enriched library, clone:1700007N07 product:hypothetical protein, full insert sequence.	0	0			2.5682	0.227698		TCONS_00005187	XLOC_004172
AK005895	ncRNA									NM_029742		498	0	1831	2329	1	0.214	0	2.008			2			1	uc009bfg.1		AK005895	Mus musculus adult male testis cDNA, RIKEN full-length enriched library, clone:1700012C14 product:unclassifiable, full insert sequence.	214.247	0.43			-0.844608	0.0369648	-136.035	TCONS_00022538	XLOC_017580
AK005899	ncRNA						BC132317,BC131987,AK034804,BC058387,Y11342,NM_011372	NM_011372				577	0	1569	2146	1	0.269	0	1.733						3					196.215	0.34			-1.03803	0.0470083	-287.279	TCONS_00018876	XLOC_014565
AK005901	ncRNA	TRUE										1379	0	1274	2653	1	0.52	0	0.725											122.189	0.089			-1.18767	0.0599426		TCONS_00000486	XLOC_000416
AK005905	ncRNA	TRUE										508	0	6759	7267	2	0.07	0	3.937					1	1	uc009akr.1		AK005905	Mus musculus adult male testis cDNA, RIKEN full-length enriched library, clone:1700012G11 product:unclassifiable, full insert sequence.	42.396	0.083			-1.19767	0.0225446	-28.1163	TCONS_00021342	XLOC_016618
AK005910	ncRNA		NM_011121	-35					AK141202	AK139291		973	0	19421	20394	3	0.048	0	3.083						1					110.202	0.113			-1.23461	0.0707914	-33.3672	TCONS_00025544	XLOC_019935
AK005912	ncRNA	TRUE	AK015526	-46								384	0	1759	2143	1	0.179	0	2.604					1		uc007mef.1		AK005912	Mus musculus adult male testis cDNA, RIKEN full-length enriched library, clone:1700012H19 product:unclassifiable, full insert sequence.	33.258	0.087				0.0278852		TCONS_00005085	XLOC_004099
AK005916	ncRNA	TRUE										471	0	10817	11288	1	0.042	0	2.123						1					18.557	0.039			-1.04848	0.0208602		TCONS_00022387	XLOC_017456
AK005917	ncRNA	TRUE										830	0	0	830	0	1	0	0			1			1					41.179	0.05			-1.28472	0.0155355		TCONS_00007341	XLOC_005641
AK005920	ncRNA		AK132576	-775			BC030038,AK162663,NM_008596,AB010140,AK083422,AK082471,AK052749	AK082471				395	0	0	395	0	1	0	0						1					162.939	0.413			2.96254	0.0765792		TCONS_00018640	XLOC_014384
AK005927	ncRNA		AK154289	-133							AK089951,AK154289,AK162101,AK173229,AY313775,BC079599,BC115430,BC115431,BC145863,BC145865,NM_026252	649	0	0	649	0	1	0	0			1		1						160.54	0.247			-1.2603	0.0456678		TCONS_00004426	XLOC_003585
AK005929	ncRNA									NM_011025		570	0	0	570	0	1	0	0					1	1					71.972	0.126			0.464685	0.308098	-39.3913	TCONS_00015737	XLOC_012156
AK005935	ncRNA										AF044222,AF044223,AK134598,AK145952,AK160233,BC024507,BC025595,BC043729,NM_011908	645	0	0	645	0	1	0	0			1		1						267.416	0.415			-1.14971	0.0396881		TCONS_00022316	XLOC_017402
AK005945	ncRNA		BC145840	131								1006	0	1680	2686	1	0.375	0	0.994			1		1						154.596	0.154			-0.812854	0.142844	-276.874	TCONS_00018884	XLOC_014572
AK005956	ncRNA		NM_026502	-117	NM_001164483	468					AK003413,AK018510,AK045905,BC019533,NM_026502	662	0	0	662	0	1	0	0			1		1	1	uc007zwv.1		AK005956	Mus musculus adult male testis cDNA, RIKEN full-length enriched library, clone:1700013I02 product:unclassifiable, full insert sequence.	99.313	0.15			0.806413	0.0370082	-2.3486	TCONS_00011228	XLOC_008661
AK005961	ncRNA									AK014843		468	0	0	468	0	1	0	0											28.718	0.061			-1.34164	0.0116256		TCONS_00028373	XLOC_022150
AK005964	ncRNA								AK031879		AK052395,AK080986,BC025502,NM_029270,NM_146161	787	0	0	787	0	1	0	0					1						7.194	0.009			-1.15739	0.00581394		TCONS_00021914	XLOC_017103
AK005966	ncRNA	TRUE										694	0	41280	41974	5	0.017	0	7.205											9.525	0.014			-1.31069	0.0789843		TCONS_00005745	XLOC_004641
AK005981	ncRNA	TRUE										481	0	14335	14816	1	0.032	0	2.079			1		1						29.683	0.062			-1.01666	0.0377152		TCONS_00026630	XLOC_020697
AK005985	ncRNA								AF079520			1165	0	4316	5481	3	0.213	0	2.575			1								287.667	0.247			-1.14069	0.0404343	24.861	TCONS_00016289	XLOC_012582
AK005986	ncRNA		AK078262	-6								374	0	4249	4623	2	0.081	0	5.348					2	1					40.674	0.109			-1.11073	0.0224071		TCONS_00007854	XLOC_006052
AK005987	ncRNA						BC132317,BC131987,AK034804,BC058387,Y11342,NM_011372	NM_011372				213	0	8134	8347	1	0.026	0	4.695					1	1	uc008rtx.1		AK005987	Mus musculus adult male testis cDNA, RIKEN full-length enriched library, clone:1700015C17 product:unclassifiable, full insert sequence.	23.49	0.11			-0.905069	0.0852154		TCONS_00018880	XLOC_014568
AK005995	ncRNA								AK032588			587	0	0	587	0	1	0	0			1		1						308.954	0.526			-0.859713	0.0262687	-212.786	TCONS_00009743	XLOC_007491
AK005997	ncRNA	TRUE										340	0	0	340	0	1	0	0			1		1						1.633	0.005			-1.08684	0.0625435		TCONS_00026729	XLOC_020779
AK006001	ncRNA		AK145239	-58								1619	0	748	2367	1	0.684	0	0.618			2				uc008nvv.1		AK006001	Mus musculus adult male testis cDNA, RIKEN full-length enriched library, clone:1700015L13 product:hypothetical protein, full insert sequence.	210.002	0.13			3.48984	0.0996994		TCONS_00017115	XLOC_013234
AK006003	ncRNA	TRUE			BC052417	15						678	0	818	1496	2	0.453	0	2.95					1	5					80.837	0.119			-0.646551	0.132181	-80.7804	TCONS_00023917	XLOC_018656
AK006004	ncRNA	TRUE										814	0	0	814	0	1	0	0			2								44.79	0.055				0.0805151		TCONS_00011677	XLOC_009053
AK006010	ncRNA	TRUE										270	0	8738	9008	1	0.03	0	3.704											44.597	0.165			-1.04062	0.0415656		TCONS_00021113	XLOC_016430
AK006012	ncRNA		BC054720	429					NM_027815		AK011615,AK018573,AK050302,AK135249,AK136140,BC054720,NM_027815	733	0	0	733	0	1	0	0			1		1						89.066	0.122			-1.09976	0.0816643	35.3586	TCONS_00025521	XLOC_019917
AK006015	ncRNA	TRUE										599	0	1429	2028	1	0.295	0	1.669							uc012ebn.1		AK006015	Mus musculus adult male testis cDNA, RIKEN full-length enriched library, clone:1700016C19 product:unclassifiable, full insert sequence.	94.594	0.158			-0.707921	0.0679813	-6.9168	TCONS_00021128	XLOC_016442
AK006017	ncRNA								AK157534.2	AK006291		651	0	13069	13720	1	0.047	0	1.536					1										4.04321	0.0732271		TCONS_00008474	XLOC_006457
AK006025	ncRNA									AK150922		655	0	2779	3434	1	0.191	0	1.527			2		1	2					88.777	0.136			-1.06495	0.0601659		TCONS_00020991	XLOC_016332
AK006032	ncRNA		NM_009771	-84							AF081887,AF099932,AF110396,AF112979,AK032221,AK052317,AK083257,AK145091,AK145624,AK180045,AK189588,AK220183,BC003989,BC052879,NM_001037758,NM_009771	434	0	0	434	0	1	0	0											113.647	0.262			-1.47921	0.00490902		TCONS_00014731	XLOC_011377
AK006037	ncRNA		AK011447	167								249	0	346	595	1	0.418	0	4.016					1	1	uc007eyj.1		AK006037	Mus musculus adult male testis cDNA, RIKEN full-length enriched library, clone:1700016J18 product:unclassifiable, full insert sequence.	0.512	0.002			1.12263	0.0125502		TCONS_00002163	XLOC_001712
AK006039	ncRNA								BC079621			384	0	5646	6030	1	0.064	0	2.604			2		1	1	uc008dkd.1		AK006039	Mus musculus adult male testis cDNA, RIKEN full-length enriched library, clone:1700016K05 product:unclassifiable, full insert sequence.	97.167	0.253			-1.4405	0.00679431		TCONS_00012168	XLOC_009447
AK006042	ncRNA		AK045721	-223					AK084011			563	0	1097	1660	1	0.339	0	1.776			1		1	1					288.142	0.512			-1.27589	0.0874469		TCONS_00018583	XLOC_014334
AK006046	ncRNA	TRUE										254	0	0	254	0	1	0	0											30.535	0.12			-1.06694	0.0583248		TCONS_00024822	XLOC_019408
AK006051	ncRNA				AK213165	8				NM_001002764		948	0	4211	5159	2	0.184	0	2.11			1		1		uc007kde.2		AK006051	Mus musculus adult male testis cDNA, RIKEN full-length enriched library, clone:1700016P03 product:unclassifiable, full insert sequence.	118.06	0.125			-1.06378	0.0381527		TCONS_00003823	XLOC_003100
AK006053	ncRNA								AK006406		BC048669,BC100504,NR_038002	395	0	0	395	0	1	0	0					1						2.863	0.007			-0.973941	0.0488208		TCONS_00001360	XLOC_001037
AK006066	ncRNA								EU887569			1353	0	0	1353	0	1	0	0			1								18.097	0.013			-1.12592	0.0314984	-15.6944	TCONS_00013416	XLOC_010413
AK006067	ncRNA	TRUE	NR_029570	-541								462	0	2724	3186	1	0.145	0	2.165					1	1					44.25	0.096				0.0223548		TCONS_00027765	XLOC_021655
AK006071	ncRNA	TRUE										558	0	2806	3364	1	0.166	0	1.792					1		uc008xwg.1		AK006071	Mus musculus adult male testis cDNA, RIKEN full-length enriched library, clone:1700017L05 product:unclassifiable, full insert sequence.	15.988	0.029			-0.929972	0.102796	-58.0591	TCONS_00020904	XLOC_016257
AK006073	ncRNA	TRUE										940	0	18730	19670	1	0.048	0	1.064					1	1					98.263	0.105			-0.38498	0.00701154		TCONS_00018155	XLOC_014077
AK006078	ncRNA								NM_025358			398	0	2403	2801	1	0.142	0	2.513											53.627	0.135			-0.963656	0.0615294	-34.2553	TCONS_00023153	XLOC_018045
AK006090	ncRNA	TRUE									AK003164,AK003352,BC096415,NM_183249	437	0	0	437	0	1	0	0											19.13	0.044			-0.776356	0.143454	-238.864	TCONS_00003921	XLOC_003177
AK006097	ncRNA	TRUE										1238	0	1251	2490	1	0.498	0	0.808					1	3					79.005	0.064				0.0843428		TCONS_00026297	XLOC_020541
AK006099	ncRNA	TRUE										908	0	17845	18753	1	0.048	0	1.101			1			1					36.615	0.04			-1.27558	0.0338906		TCONS_00007810	XLOC_006015
AK006100	ncRNA		NM_001045524	-218								503	0	829	1332	1	0.378	0	1.988			2		1	1					71.755	0.143			2.30787	0.0199358	-34.6592	TCONS_00027285	XLOC_021251
AK006109	ncRNA	TRUE										410	0	979	1389	1	0.295	0	2.439					1	1					75.165	0.183			-0.929889	0.0751364		TCONS_00007670	XLOC_005895
AK006117	ncRNA	TRUE										532	0	6993	7525	1	0.071	0	1.88			2		1						74.271	0.14				0.0395072		TCONS_00020882	XLOC_016235
AK006123	ncRNA				AK045352	633			BC094659			619	0	0	619	0	1	0	0											27.359	0.044			-1.12537	0.0569681		TCONS_00026084	XLOC_020370
AK006126	ncRNA	TRUE										972	0	18448	19421	3	0.05	0	3.086					1						285.969	0.294			1.34718	0.135084	-62.5078	TCONS_00027300	XLOC_021265
AK006130	ncRNA		AK029893	-122					BC050066	DQ011665	AK029893	1645	0	0	1646	0	1	0	0											499.522	0.304			-0.939394	0.165434	-119.706	TCONS_00027964	XLOC_021822
AK006131	ncRNA	TRUE										630	0	124303	124933	3	0.005	0	4.762					1		uc009lrx.1		AK006131	Mus musculus adult male testis cDNA, RIKEN full-length enriched library, clone:1700019L22 product:unclassifiable, full insert sequence.	58.251	0.092			-1.02943	0.0352487		TCONS_00026832	XLOC_020874
AK006139	ncRNA	TRUE										408	0	269	677	1	0.603	0	2.451					1	1	uc007cvx.1		AK006139	Mus musculus adult male testis cDNA, RIKEN full-length enriched library, clone:1700019P21 product:unclassifiable, full insert sequence.	242.054	0.593			0.733612	0.049079		TCONS_00001637	XLOC_001275
AK006142	ncRNA	TRUE										453	0	0	453	0	1	0	0											18.138	0.04			-0.82287	0.0699077		TCONS_00011522	XLOC_008918
AK006151	ncRNA	TRUE										426	0	29776	30202	1	0.014	0	2.347			1		1	1					2.641	0.006			-1.15169	0.0214621	-59.0591	TCONS_00006070	XLOC_004793
AK006156	ncRNA								AK147344			688	0	573	1261	1	0.546	0	1.453											5.395	0.008			-1.00736	0.0980397	-20.5224	TCONS_00004801	XLOC_003861
AK006158	ncRNA		NM_182991	-822							AK005155,BC056172,NM_182991	889	0	0	889	0	1	0	0			1								266.434	0.3			-1.0646	0.0673362		TCONS_00026019	XLOC_020320
AK006160	ncRNA	TRUE										720	0	83022	83742	3	0.009	0	4.167							uc007gzr.1		AK006160	Mus musculus adult male testis cDNA, RIKEN full-length enriched library, clone:1700020G17 product:unclassifiable, full insert sequence.	16.863	0.023			-1.31462	0.0288037		TCONS_00003310	XLOC_002668
AK006165	ncRNA	TRUE										1410	0	8115	9525	3	0.148	0	2.128					2	2					85.438	0.061			-1.11469	0.0596596		TCONS_00008683	XLOC_006632
AK006167	ncRNA											379	0	3780	4159	2	0.091	0	5.277							uc009qow.1		AK006167	Mus musculus adult male testis cDNA, RIKEN full-length enriched library, clone:1700020I22 product:unclassifiable, full insert sequence.	94.611	0.25			-0.747164	0.13212	-263.729	TCONS_00028433	XLOC_022206
AK006169	ncRNA						BC112409,NM_177612,DQ380429,AK030166,NM_001164376,AK142745,AF344871	AK030166				483	0	0	483	0	1	0	0			2		1						197.515	0.409				0.056215	-553.225	TCONS_00002274	XLOC_001812
AK006171	ncRNA								AK165375		BC137951,BC137952	277	0	0	277	0	1	0	0											62.828	0.227			-1.10494	0.0107145		TCONS_00015065	XLOC_011634
AK006176	ncRNA											485	0	516089	516585	6	0.001	0	12.371											0.241	0			1.71309	0.0231415		TCONS_00001402	XLOC_001076
AK006182	ncRNA									AK044658		547	0	604	1151	2	0.475	0	3.656			1								77.954	0.143			-0.559186	0.054654	1.2071	TCONS_00001448	XLOC_001115
AK006189	ncRNA									AF510322		485	0	5785	6270	1	0.077	0	2.062						1	uc007eor.1		AK006189	Mus musculus adult male testis cDNA, RIKEN full-length enriched library, clone:1700021A07 product:hypothetical protein, full insert sequence.	7.899	0.016				0.19868	-43.48	TCONS_00002061	XLOC_001624
AK006198	ncRNA	TRUE										346	0	1356	1702	1	0.203	0	2.89			1			1					84.282	0.244			-0.0173079	0.0262858	-35.9782	TCONS_00021030	XLOC_016363
AK006202	ncRNA									AK087181		469	0	2072	2541	1	0.185	0	2.132					1	1	uc008zgx.1		AK006202	Mus musculus adult male testis cDNA, RIKEN full-length enriched library, clone:1700021F13 product:unclassifiable, full insert sequence.	11.689	0.025			-0.896606	0.0696492	-142.358	TCONS_00022078	XLOC_017211
AK006204	ncRNA	TRUE										528	0	1574	2102	1	0.251	0	1.894					1						137.58	0.261			-0.965325	0.0106709		TCONS_00002625	XLOC_002113
AK006209	ncRNA		AK006883	-152	AK192145	8			AK163323			575	0	272	847	1	0.679	0	1.739											300.572	0.523				0.342844	29.203	TCONS_00020233	XLOC_015716
AK006220	ncRNA	TRUE										726	0	7899	8625	1	0.084	0	1.377					1						165.301	0.228			-0.99606	0.025941		TCONS_00020261	XLOC_015742
AK006223	ncRNA								AF276314			341	0	0	341	0	1	0	0			1		1						75.049	0.22			-0.846421	0.0431922	-206.189	TCONS_00014769	XLOC_011410
AK006231	ncRNA	TRUE										881	0	48460	49341	3	0.018	0	3.405					1	3	uc007vqn.1		AK006231	Mus musculus adult male testis cDNA, RIKEN full-length enriched library, clone:1700022A22 product:RIKEN cDNA 1700022A22 gene, full insert sequence.	18.856	0.021			0.280998	0.107746		TCONS_00009742	XLOC_007490
AK006235	ncRNA		AK145020	-127							AK041847,AK145020,BC141370,BC141371,NM_001033222	768	0	0	768	0	1	0	0			1								27.847	0.036			-1.17139	0.0114028		TCONS_00014348	XLOC_011099
AK006238	ncRNA						NM_001177964,AK003729	AK003729				754	0	0	754	0	1	0	0			1		1						37.112	0.049			3.09717	0.0383087		TCONS_00006079	XLOC_004799
AK006239	ncRNA		AK157843	-54	BC010468	621						387	0	5080	5467	1	0.071	0	2.584					2	3	uc007fgf.1		AK006239	Mus musculus adult male testis cDNA, RIKEN full-length enriched library, clone:1700022H01 product:unclassifiable, full insert sequence.	20.321	0.053				0.0324681		TCONS_00003010	XLOC_002430
AK006250	ncRNA		AK143711	-108	NM_001162869	566				AK052760		709	0	1946	2655	1	0.267	0	1.41					1	1	uc008bdb.1		AK006250	Mus musculus adult male testis cDNA, RIKEN full-length enriched library, clone:1700022N22 product:unclassifiable, full insert sequence.	34.199	0.048			1.09019	0.0922423	18.2201	TCONS_00011977	XLOC_009283
AK006259	ncRNA	TRUE	NM_172766	-145							AK041206,AK043432,BC033595,BC059861,BC060076,NM_172766	1032	0	0	1043	0	1	0	0			1		1	1					110.36	0.107				0.0487177		TCONS_00028160	XLOC_021987
AK006261	ncRNA								NM_001111099		AK007630,AK089093,AK139306,AK149910,AK170467,BC002043,NM_007669,U24173	1046	0	0	1046	0	1	0	0					1	2					59.735	0.057			-1.13033	0.133825	40.8753	TCONS_00012441	XLOC_009674
AK006266	ncRNA		AK148238	-422							AF067806,AK148238,AK149561,BC125578,BC132145,NM_008803	986	0	0	986	0	1	0	0											87.749	0.089			-1.28847	0.0441493		TCONS_00025355	XLOC_019776
AK006267	ncRNA		NM_016813	-82	BC021883	920				AK178817	AF093140,AK077644,AK079583,AK086527,AK088634,AK133883,AK143640,AK167518,AK199824,BC005594,NM_016813	458	0	0	458	0	1	0	0											12.098	0.026			-1.04391	0.0897284		TCONS_00014477	XLOC_011166
AK006276	ncRNA									AK145411		567	0	0	567	0	1	0	0											110.073	0.194			-0.939618	0.0389909	-264.019	TCONS_00025643	XLOC_020018
AK006277	ncRNA	TRUE										1460	0	1720	3180	1	0.459	0	0.685			5		2	4					141.043	0.097			0.737366	0.0868925	-16.2356	TCONS_00000928	XLOC_000678
AK006278	ncRNA		AK163364	-570					AK088288			1044	0	257	1301	1	0.802	0	0.958					1	1					456.223	0.437			-1.14308	0.0187559	-184.542	TCONS_00008039	XLOC_006108
AK006298	ncRNA										AJ344340,AK013115,BC094289,NM_133710	558	0	0	558	0	1	0	0					1						7.152	0.013			-1.06049	0.0372409	-177.871	TCONS_00028766	XLOC_022482
AK006302	ncRNA		NM_153173	-100					BC160303	BC156748		1080	0	2853	3933	1	0.275	0	0.926			1			1					175.604	0.163			-1.26342	0.0101445		TCONS_00007577	XLOC_005831
AK006304	ncRNA	TRUE										754	0	57784	58538	4	0.013	0	5.305					1	1	uc007qxz.1		AK006304	Mus musculus adult male testis cDNA, RIKEN full-length enriched library, clone:1700024I08 product:unclassifiable, full insert sequence.	100.15	0.133			-0.921801	0.069854		TCONS_00007851	XLOC_006049
AK006308	ncRNA											690	0	9173	9863	3	0.07	0	4.348	1		3		1	1	uc009bsg.1		AK006308	Mus musculus adult male testis cDNA, RIKEN full-length enriched library, clone:1700024N05 product:unclassifiable, full insert sequence.	4.007	0.006			-1.15225	0.0230191		TCONS_00023493	XLOC_018313
AK006312	ncRNA		AK211769	252					U59418			602	0	0	602	0	1	0	0			2		1						157.652	0.262			-1.15936	0.0162444		TCONS_00006514	XLOC_005147
AK006313	ncRNA		AK164215	115							AK164215	1053	0	0	1059	0	1	0	0					1	1					28.523	0.027			2.74447	0.345139		TCONS_00011796	XLOC_009147
AK006317	ncRNA		NM_001033415	-56						BC129872	AK077061,AK085772,AK143290,BC120534,BC120536,NM_001033415	609	0	0	609	0	1	0	0					1	2					54.389	0.089			-1.27348	0.0569544		TCONS_00021771	XLOC_016980
AK006331	ncRNA	TRUE										785	0	3085	3870	1	0.203	0	1.274							uc007mfh.1		AK006331	Mus musculus adult male testis cDNA, RIKEN full-length enriched library, clone:1700025D23 product:unclassifiable, full insert sequence.	108.755	0.139			1.59542	0.0418147		TCONS_00004151	XLOC_003369
AK006343	ncRNA	TRUE										2334	0	59641	61975	7	0.038	0	2.999			2		1	1	uc007qnl.1		AK006343	Mus musculus adult male testis cDNA, RIKEN full-length enriched library, clone:1700025I17 product:unclassifiable, full insert sequence.	536.294	0.23			-0.950835	0.107007		TCONS_00006936	XLOC_005410
AK006345	ncRNA		AK015854	349			AK028643,AK052818,BC080280,BC144782,BC137614,AK053651,NM_198164,NM_001168304,BC062100,BC048908,AK147340,AK122421	AK028643			AK052818,AK053651,BC080280,BC137614,BC144782	597	0	0	597	0	1	0	0											196.319	0.329			-0.933536	0.00422543		TCONS_00002153	XLOC_001704
AK006348	ncRNA	TRUE	AK005578	-66					Guttman10_novel_lincs_TCONS_00002565			630	0	1059	1689	1	0.373	0	1.587					1		uc009jnu.1		AK006348	Mus musculus adult male testis cDNA, RIKEN full-length enriched library, clone:1700025J12 product:unclassifiable, full insert sequence.	15.409	0.024	TRUE		-1.17853	0.0563998	-237.122	TCONS_00024757	XLOC_019353
AK006351	ncRNA	TRUE										1173	0	1914	3088	1	0.38	0	0.853			3								48.905	0.042			-0.95405	0.0380163	-92.5678	TCONS_00002626	XLOC_002114
AK006355	ncRNA	TRUE										893	0	2391	3284	1	0.272	0	1.12			3				uc009gyl.1		AK006355	Mus musculus adult male testis cDNA, RIKEN full-length enriched library, clone:1700025L06 product:unclassifiable, full insert sequence.	176.003	0.197			-0.480017	0.0491406	-51.4705	TCONS_00025070	XLOC_019609
AK006360	ncRNA								NM_021439			686	0	2203	2889	1	0.237	0	1.458					1	1					63.568	0.093			-1.14703	0.0199723		TCONS_00003135	XLOC_002531
AK006362	ncRNA	TRUE										454	0	9813	10267	1	0.044	0	2.203					1	1	uc008sdr.1		AK006362	Mus musculus adult male testis cDNA, RIKEN full-length enriched library, clone:1700025O08 product:hypothetical protein, full insert sequence.	115.151	0.254			3.56511	0.116751	-85.1129	TCONS_00019805	XLOC_015337
AK006385	ncRNA								AK133267			1673	0	2549	4223	1	0.396	0	0.598			4								234.645	0.14			-0.893386	0.0762613	-38.9658	TCONS_00002784	XLOC_002236
AK006390	ncRNA		NM_133764	-94			L35549	L35549		L35549		794	0	99	893	1	0.889	0	1.259					1	1					69.387	0.087			-1.14079	0.0867859		TCONS_00023516	XLOC_018333
AK006396	ncRNA		AK154013	-197						AK169851		643	0	2458	3101	1	0.207	0	1.555											81.947	0.127			-0.835998	0.110809	12.2111	TCONS_00006909	XLOC_005387
AK006397	ncRNA								NM_016721			635	0	6156	6791	2	0.094	0	3.15					1	1	uc009ibe.1		AK006397	Mus musculus adult male testis cDNA, RIKEN full-length enriched library, clone:1700026N08 product:IQ motif containing GTPase activating protein 1, full insert sequence.	149.076	0.235			-1.10394	0.195251		TCONS_00024501	XLOC_019144
AK006399	ncRNA		AK155948	-115						AF443192	BC018601,BC034558,BC059888,NM_134033	656	0	0	656	0	1	0	0						1					229.846	0.35			-0.980669	0.286108	141.43	TCONS_00003449	XLOC_002786
AK006405	ncRNA								BC117535			316	0	0	316	0	1	0	0						1					1.047	0.003			-0.996315	0.0320056		TCONS_00025748	XLOC_020098
AK006409	ncRNA		AK047451	-82								882	0	6107	6989	3	0.126	0	3.401			2		2	1	uc007sfi.1		AK006409	Mus musculus adult male testis cDNA, RIKEN full-length enriched library, clone:1700027C12 product:unclassifiable, full insert sequence.	70.718	0.08			-1.1629	0.0064386	-106.255	TCONS_00008322	XLOC_006325
AK006412	ncRNA	TRUE										243	0	976	1219	1	0.199	0	4.115							uc009dqq.1		AK006412	Mus musculus adult male testis cDNA, RIKEN full-length enriched library, clone:1700027F06 product:unclassifiable, full insert sequence.	8.801	0.036			-1.05674	0.0276005		TCONS_00023993	XLOC_018725
AK006436	ncRNA									NM_001101609		246	0	0	246	0	1	0	0					1	1					34.538	0.14			-1.10635	0.0235104		TCONS_00008808	XLOC_006726
AK006445	ncRNA									DQ070870		971	0	4193	5164	1	0.188	0	1.03			1		1	1					47.877	0.049			1.89411	0.155655		TCONS_00024261	XLOC_018952
AK006455	ncRNA	TRUE										416	0	21797	22213	2	0.019	0	4.808			2		1	2	uc007qwp.1		AK006455	Mus musculus adult male testis cDNA, RIKEN full-length enriched library, clone:1700028E11 product:unclassifiable, full insert sequence.	0.465	0.001			-1.10533	0.165895		TCONS_00007007	XLOC_005462
AK006457	ncRNA	TRUE										803	0	1481	2284	1	0.352	0	1.245					1		uc008xwt.1		AK006457	Mus musculus adult male testis cDNA, RIKEN full-length enriched library, clone:1700028F23 product:unclassifiable, full insert sequence.	241.602	0.301			-1.10362	0.0567006	39.42	TCONS_00021836	XLOC_017037
AK006465	ncRNA	TRUE										469	0	18284	18753	4	0.025	0	8.529					1						112.981	0.241			1.47441	0.0304951		TCONS_00018458	XLOC_014236
AK006483	ncRNA	TRUE										497	0	0	497	0	1	0	0											48.589	0.098			-1.22211	0.0623474		TCONS_00017295	XLOC_013364
AK006485	ncRNA	TRUE	AK019635	-40								757	0	1497	2254	1	0.336	0	1.321			2				uc008xlw.1		AK006485	Mus musculus adult male testis cDNA, RIKEN full-length enriched library, clone:1700029E06 product:unclassifiable, full insert sequence.	26.331	0.035			0.972274	0.0365832		TCONS_00020815	XLOC_016186
AK006486	ncRNA	TRUE							AK079198			1073	0	50680	51753	6	0.021	0	5.592					1		uc008nbr.1		AK006486	Mus musculus adult male testis cDNA, RIKEN full-length enriched library, clone:1700029E19 product:unclassifiable, full insert sequence.	46.092	0.043			0.868071	0.181619		TCONS_00016992	XLOC_013158
AK006502	ncRNA	TRUE										378	0	3552	3930	2	0.096	0	5.291					1	1					60.645	0.16			-0.908497	0.01222		TCONS_00006177	XLOC_004876
AK006506	ncRNA		NM_011072	-512					BC048402		AK002485,AK011066,AK028117,AK150780,AK152491,AK160191,BC002080,BC013460,CT010193,NM_001136062,NM_007933,NM_011072,X14425,X57747,X62667	477	0	0	477	0	1	0	0			1								95.346	0.2			-1.13775	0.0328765		TCONS_00003794	XLOC_003077
AK006507	ncRNA	TRUE										356	0	123	479	1	0.743	0	2.809			1		1		uc007dit.1		AK006507	Mus musculus adult male testis cDNA, RIKEN full-length enriched library, clone:1700029M03 product:unclassifiable, full insert sequence.	8.851	0.025			-1.15949	0.0378636		TCONS_00000811	XLOC_000583
AK006530	ncRNA		AK186357	36						NM_001190401		534	0	1350	1884	2	0.283	0	3.745											105.651	0.198			-0.960542	0.048226	-73.7944	TCONS_00003543	XLOC_002860
AK006531	ncRNA								BC141487			756	0	692	1448	1	0.522	0	1.323					1		uc008nfy.1		AK006531	Mus musculus adult male testis cDNA, RIKEN full-length enriched library, clone:1700030C14 product:unclassifiable, full insert sequence.	264.517	0.35			-1.0144	0.0945881	-240.299	TCONS_00017003	XLOC_013165
AK006532	ncRNA		BC003937	-18							AK027983,AK034676,AK037024,AK040354,AK044959,AK044996,AK047523,AK079301,AK136125,AK161141,AK167449,AK173198,BC003937,BC011476,NM_001113416,NM_145506	785	0	0	785	0	1	0	0			1								162.96	0.208			-0.980793	0.0650349		TCONS_00000484	XLOC_000414
AK006537	ncRNA	TRUE			AK033779	-849						688	0	8731	9420	2	0.073	0	2.907						1					231.717	0.337			-1.05676	0.0347037		TCONS_00003058	XLOC_002464
AK006545	ncRNA		AK084683	-73								786	0	150000	150786	5	0.005	0	6.361			1		1	1					54.885	0.07				0.143333		TCONS_00020606	XLOC_016020
AK006550	ncRNA		AK017080	-97			BC125030,BC125029,NM_015812,AK052527,AK053087,BC038616,AF061933,AK044067	AK052527				941	0	0	942	0	1	0	0						1					164.231	0.175			-1.12706	0.0725889	-257.253	TCONS_00005596	XLOC_004514
AK006560	ncRNA								BC167248			704	0	5791	6495	1	0.108	0	1.42	1				1		uc007nnq.1		AK006560	Mus musculus adult male testis cDNA, RIKEN full-length enriched library, clone:1700030L22 product:unclassifiable, full insert sequence.	29.806	0.042			-1.091	0.0574676		TCONS_00006172	XLOC_004871
AK006563	ncRNA	TRUE										465	0	44039	44504	3	0.01	0	6.452					1		uc008fvy.1		AK006563	Mus musculus adult male testis cDNA, RIKEN full-length enriched library, clone:1700030N03 product:unclassifiable, full insert sequence.	8.873	0.019			-1.21843	0.0245626		TCONS_00014361	XLOC_011110
AK006564	ncRNA	TRUE										962	0	0	966	0	1	0	0					1	1					378.269	0.393			-1.19299	0.0273092	-10.6329	TCONS_00022196	XLOC_017308
AK006568	ncRNA	TRUE										763	0	31620	32383	3	0.024	0	3.932			2		1		uc007rys.1		AK006568	Mus musculus adult male testis cDNA, RIKEN full-length enriched library, clone:1700003P14 product:unclassifiable, full insert sequence.	31.867	0.042			-1.19564	0.0321733		TCONS_00007475	XLOC_005748
AK006572	ncRNA		AK129122	202					AF041857			511	0	80	591	1	0.865	0	1.957			1				uc008afq.1		AK006572	Mus musculus adult male testis cDNA, RIKEN full-length enriched library, clone:1700030P01 product:unclassifiable, full insert sequence.	4.342	0.008			-0.927507	0.0895267	-191.662	TCONS_00012315	XLOC_009577
AK006573	ncRNA		NM_206534	173						BC066825	BC019472,BC076499,NM_206534	459	0	0	459	0	1	0	0					1						121.541	0.265			-1.1464	0.00441948		TCONS_00006285	XLOC_004961
AK006575	ncRNA											1546	0	6694	8240	2	0.188	0	1.294			2		1	1	uc011zjr.1		4933429O19Rik	Mus musculus adult male testis cDNA, RIKEN full-length enriched library, clone:1700031B11 product:unclassifiable, full insert sequence.	64.774	0.042				0.02325		TCONS_00008513	XLOC_006489
AK006581	ncRNA		AK048672.1	-667					AK051496	AK139008.2		425	0	31303	31728	3	0.013	0	7.059			1		1	2	uc008sme.1		AK006581	Mus musculus adult male testis cDNA, RIKEN full-length enriched library, clone:1700031K17 product:unclassifiable, full insert sequence.	47.775	0.112			0.406509	0.079242	-14.7518	TCONS_00019884	XLOC_015405
AK006585	ncRNA	TRUE										847	0	16977	17824	9	0.048	0	10.626					1	1					170.601	0.201				0.277764	50.2562	TCONS_00010022	XLOC_007698
AK006590	ncRNA	TRUE										720	0	550	1270	1	0.567	0	1.389											12.706	0.018			-1.39299	0.0388541		TCONS_00013395	XLOC_010393
AK006600	ncRNA								BC059874	D38023		867	0	11753	12627	4	0.069	0	4.614											312.101	0.36			-1.1719	0.0981181		TCONS_00002682	XLOC_002162
AK006607	ncRNA											2255	0	42020	44275	6	0.051	0	2.661			1		1		uc007agt.1		AK006607	Mus musculus adult male testis cDNA, RIKEN full-length enriched library, clone:1700034P13 product:unclassifiable, full insert sequence.	909.291	0.403			0.289344	0.0670646		TCONS_00000019	XLOC_000018
AK006610	ncRNA								AK082926	AK078840		440	0	167	607	1	0.725	0	2.273					1	3	uc008hnr.1		AK006610	Mus musculus adult male testis cDNA, RIKEN full-length enriched library, clone:1700036B12 product:unclassifiable, full insert sequence.	128.628	0.292			-0.930193	0.0564222	-429.835	TCONS_00014704	XLOC_011354
AK006615	ncRNA	TRUE										349	0	659	1008	1	0.346	0	2.865			1		1						10.14	0.029				0.0172025	-108.135	TCONS_00028981	XLOC_022643
AK006616	ncRNA		BC022761	-224						AK135721		1041	0	613	1663	1	0.631	0	0.961					1						90.223	0.087			-1.08479	0.071893	-266.556	TCONS_00027875	XLOC_021748
AK006618	ncRNA	TRUE										873	0	0	873	0	1	0	0					1						71.261	0.082			-0.938356	0.12512		TCONS_00020370	XLOC_015827
AK006621	ncRNA								BC066109	AK015739		973	0	1762	2735	1	0.356	0	1.028			1		1	1					87.499	0.09			-1.14294	0.0603561	-3.6147	TCONS_00001583	XLOC_001230
AK006623	ncRNA	TRUE										317	0	106	423	1	0.749	0	3.155			2		1	1	uc009ogl.1		AK006623	Mus musculus adult male testis cDNA, RIKEN full-length enriched library, clone:1700037J18 product:unclassifiable, full insert sequence.	203.413	0.642			-0.902185	0.0148586		TCONS_00027315	XLOC_021277
AK006624	ncRNA								AK032529			1129	0	0	1130	0	1	0	0					1						69.273	0.061			-1.14546	0.189975	-149.947	TCONS_00018418	XLOC_014198
AK006629	ncRNA	TRUE										508	0	0	508	0	1	0	0			1								4.403	0.009			-0.167392	0.00861528		TCONS_00002481	XLOC_001990
AK006633	ncRNA		AK015466	-119					BC079566			398	0	6323	6721	1	0.059	0	2.513					1	1	uc007ejk.1		AK006633	Mus musculus adult male testis cDNA, RIKEN full-length enriched library, clone:1700038H22 product:unclassifiable, full insert sequence.	58.021	0.146			-0.602188	0.162727	-35.2583	TCONS_00002013	XLOC_001589
AK006636	ncRNA								BC078639			1591	0	0	1594	0	1	0	0											866.05	0.544			0.0501455	0.106109	-57.032	TCONS_00016805	XLOC_013001
AK006642	ncRNA								Guttman11_TCONS_00000001			479	0	0	479	0	1	0	0					1	1					155.831	0.325	TRUE		0.528401	0.00441789		TCONS_00001300	XLOC_000982
AK006644	ncRNA		NM_026526	-44						NM_145837		532	0	223	755	1	0.705	0	1.88					1		uc007ude.1		AK006644	Mus musculus adult male testis cDNA, RIKEN full-length enriched library, clone:1700025B10 product:RIKEN cDNA 1700039M10 gene, full insert sequence.	36.058	0.068			-1.18036	0.0678723		TCONS_00008568	XLOC_006533
AK006645	ncRNA	TRUE										1119	0	1658	2778	1	0.403	0	0.894					1	1					111.421	0.1				0.148968	-48.3531	TCONS_00027876	XLOC_021749
AK006648	ncRNA								AK177407	BC117733		451	0	0	451	0	1	0	0			1								228.021	0.506			4.92574	0.150307		TCONS_00008543	XLOC_006514
AK006649	ncRNA		U19859	-38							AK140135,AY692443,BC003779,DQ189098,NM_018855,U19859	447	0	0	447	0	1	0	0											16.665	0.037			-1.12364	0.0270908		TCONS_00027234	XLOC_021208
AK006651	ncRNA		BC057030	-383						NM_016901		991	0	2527	3518	1	0.282	0	1.009	1		2			1	uc008qgc.1		AK006651	Mus musculus adult male testis cDNA, RIKEN full-length enriched library, clone:1700040D17 product:unclassifiable, full insert sequence.	178.551	0.18			-1.17175	0.0283157	-70.8048	TCONS_00018520	XLOC_014283
AK006652	ncRNA	TRUE										606	0	32525	33131	1	0.018	0	1.65			2		1	2					20.815	0.034			-1.25092	0.0650792		TCONS_00005632	XLOC_004549
AK006657	ncRNA		NM_001136476	-75					NM_001104946			1102	0	15208	16310	5	0.068	0	4.537			1		1						23.898	0.022			0.167774	0.0464482		TCONS_00028899	XLOC_022571
AK006660	ncRNA	TRUE										438	0	0	438	0	1	0	0			1		1						98.271	0.224			-0.856371	0.0315423		TCONS_00000733	XLOC_000531
AK006662	ncRNA		BC039759	125								541	0	382	923	1	0.586	0	1.848						1					156.751	0.29			-1.06015	0.0396923		TCONS_00023613	XLOC_018412
AK006664	ncRNA	TRUE										275	0	5305	5580	1	0.049	0	3.636					1	1	uc008zlk.1		AK006664	Mus musculus adult male testis cDNA, RIKEN full-length enriched library, clone:1700040P09 product:unclassifiable, full insert sequence.	134.214	0.488				0.0338403		TCONS_00021211	XLOC_016512
AK006665	ncRNA	TRUE										369	0	9294	9663	2	0.038	0	5.42					1						1.61	0.004			-0.804239	0.0385928		TCONS_00021843	XLOC_017044
AK006673	ncRNA		AK006739	-911								435	0	10081	10516	1	0.041	0	2.299	1		1								10.308	0.024			2.31451	0.0533601	-20.5346	TCONS_00021357	XLOC_016630
AK006675	ncRNA	TRUE	AK080590	-71							AK046527,AK047322,AK052446,AK080590,AK080858,AK148285,BC055060,NM_001145955,NM_001145956,NM_178698	519	0	0	519	0	1	0	0											129.109	0.249			-1.18561	0.0668248		TCONS_00019570	XLOC_015134
AK006677	ncRNA	TRUE										306	0	13150	13456	1	0.023	0	3.268					1		uc008urz.1		AK006677	Mus musculus adult male testis cDNA, RIKEN full-length enriched library, clone:1700041M05 product:unclassifiable, full insert sequence.	66.245	0.216			-0.871679	0.0769867		TCONS_00019484	XLOC_015067
AK006678	ncRNA	TRUE										682	0	3141	3823	1	0.178	0	1.466											89.872	0.132			-0.83771	0.0462815		TCONS_00011672	XLOC_009048
AK006681	ncRNA		AK168479	-147								389	0	3742	4131	1	0.094	0	2.571					1	1					20.981	0.054			-1.11638	0.0705067		TCONS_00028271	XLOC_022067
AK006682	ncRNA				AK082648	193			AK135058			1100	0	0	1100	0	1	0	0					2	1					172.289	0.157			-1.06861	0.0839232		TCONS_00007297	XLOC_005604
AK006687	ncRNA		BC120697	187							AK042879,AK156958,BC120695,BC120697,NM_172473	631	0	0	631	0	1	0	0					1	1					168.575	0.267			-1.33422	0.0448375		TCONS_00002941	XLOC_002368
AK006689	ncRNA											584	0	8259	8843	1	0.066	0	1.712					1	2					37.116	0.064			-1.04533	0.0530742		TCONS_00002204	XLOC_001751
AK006691	ncRNA	TRUE										879	0	0	879	0	1	0	0			1			1					191.545	0.218			-0.773739	0.1268	-151.927	TCONS_00017281	XLOC_013356
AK006697	ncRNA								NM_001253716			514	0	0	514	0	1	0	0											3.14	0.006			-0.87337	0.0978005		TCONS_00008611	XLOC_006571
AK006702	ncRNA								NM_207659			620	0	13292	13912	4	0.045	0	6.452			2				uc009lhk.1		AK006702	Mus musculus adult male testis cDNA, RIKEN full-length enriched library, clone:1700047A11 product:unclassifiable, full insert sequence.	120.173	0.194				0.0620945	-52.945	TCONS_00025828	XLOC_020166
AK006704	ncRNA	TRUE										568	0	21063	21631	2	0.026	0	3.521					2	3									-0.0499124	0.059156		TCONS_00009048	XLOC_006927
AK006706	ncRNA	TRUE										543	0	9381	9924	2	0.055	0	3.683			1				uc008tzz.1		AK006706	Mus musculus adult male testis cDNA, RIKEN full-length enriched library, clone:1700047F07 product:unclassifiable, full insert sequence.	105.412	0.194			-1.10021	0.0696238		TCONS_00019383	XLOC_014980
AK006709	ncRNA	TRUE										451	0	814	1265	1	0.357	0	2.217							uc009mzl.1		AK006709	Mus musculus adult male testis cDNA, RIKEN full-length enriched library, clone:1700047G07 product:hypothetical protein, full insert sequence.	1.292	0.003			1.28606	0.00563444		TCONS_00026187	XLOC_020454
AK006712	ncRNA				NM_172532	298				AK148668		1485	0	203	1688	1	0.88	0	0.673					1	1	uc011yxs.1		AK006712	Mus musculus adult male testis cDNA, RIKEN full-length enriched library, clone:1700047I16 product:aldehyde dehydrogenase family 5, subfamily A1, full insert sequence.	485.066	0.327				0.0581855	-1.7156	TCONS_00006785	XLOC_005290
AK006719	ncRNA								NM_026493			920	0	0	920	0	1	0	0			3		1						104.007	0.113			-1.35982	0.0109767		TCONS_00001036	XLOC_000751
AK006720	ncRNA	TRUE										741	0	0	743	0	1	0	0			1			1					11.264	0.015			-0.851344	0.032723		TCONS_00024181	XLOC_018885
AK006721	ncRNA	TRUE										810	0	15100	15911	3	0.051	0	3.704			1			1					62.199	0.077				0.164415		TCONS_00007756	XLOC_005970
AK006722	ncRNA								BC050948			302	0	0	302	0	1	0	0			1		1	1					27.853	0.092			-1.25968	0.0220589		TCONS_00024811	XLOC_019399
AK006725	ncRNA	TRUE										1055	0	22797	23852	1	0.044	0	0.948			2		2		uc008zru.1		AK006725	Mus musculus adult male testis cDNA, RIKEN full-length enriched library, clone:1700048F04 product:unclassifiable, full insert sequence.	51.146	0.048			-1.00497	0.0338038		TCONS_00021237	XLOC_016535
AK006729	ncRNA	TRUE										406	0	2056	2462	1	0.165	0	2.463					1						46.53	0.115			-0.733404	0.0194141		TCONS_00014611	XLOC_011278
AK006733	ncRNA	TRUE										521	0	7495	8016	2	0.065	0	3.839						1					33.705	0.065			1.23978	0.0493673		TCONS_00014564	XLOC_011239
AK006735	ncRNA	TRUE										287	0	0	287	0	1	0	0											7.717	0.027			-0.974919	0.122183		TCONS_00003071	XLOC_002475
AK006740	ncRNA								BC039125			484	0	10683	11167	3	0.043	0	6.198					1	1					130.23	0.269			-0.919791	0.0445037		TCONS_00027283	XLOC_021249
AK006745	ncRNA		NM_026170	-12								421	0	6825	7246	1	0.058	0	2.375						1					108.085	0.257			2.26105	0.0160165		TCONS_00012416	XLOC_009657
AK006751	ncRNA		U22107	71							AK002446,AK006711,AK030250,AK030925,AK054480,BC024378,BC053379,BC058116,NM_001113358,NM_001205181,NM_010015,U22107,U83628	296	0	0	296	0	1	0	0											92.892	0.314			-1.32445	0.152187		TCONS_00008541	XLOC_006512
AK006752	ncRNA		BC156117	145								1782	0	355	2137	1	0.834	0	0.561			3				uc007jyo.1		AK006752	Mus musculus adult male testis cDNA, RIKEN full-length enriched library, clone:1700051A21 product:unclassifiable, full insert sequence.	287.073	0.161			-1.10087	0.0789211	-17.5634	TCONS_00003801	XLOC_003084
AK006761	ncRNA								AK155150			696	0	0	696	0	1	0	0			1		1	1					9.904	0.014			-1.25826	0.0292258		TCONS_00024054	XLOC_018773
AK006764	ncRNA		AK007050	23							AK007050,AK013123,AK014959,AK017512,AK169408,BC027027,BC040087,BC050139,NM_025722	630	0	0	630	0	1	0	0					1	1					101.605	0.161			1.99955	0.0122257		TCONS_00026111	XLOC_020395
AK006766	ncRNA	TRUE										429	0	14556	14985	2	0.029	0	4.662			2		1	1	uc008pcg.1		AK006766	Mus musculus adult male testis cDNA, RIKEN full-length enriched library, clone:1700052H01 product:unclassifiable, full insert sequence.	60.383	0.141	TRUE		-1.00173	0.0204012		TCONS_00017429	XLOC_013477
AK006768	ncRNA								BC072561			464	0	15334	15798	2	0.029	0	4.31							uc007bdw.1		AK006768	Mus musculus adult male testis cDNA, RIKEN full-length enriched library, clone:1700052I12 product:unclassifiable, full insert sequence.	17.017	0.037			-0.987809	0.0467099		TCONS_00001275	XLOC_000961
AK006770	ncRNA	TRUE										443	0	7267	7710	1	0.057	0	2.257						1					36.832	0.083	TRUE		-1.06353	0.0912154		TCONS_00021522	XLOC_016771
AK006774	ncRNA	TRUE										874	0	0	875	0	1	0	0						1					29.038	0.033			-1.0186	0.0292722		TCONS_00008437	XLOC_006424
AK006784	ncRNA		AK090247	-67								792	0	11312	12104	3	0.065	0	3.788											91.968	0.116			-1.05379	0.106158		TCONS_00016288	XLOC_012581
AK006793	ncRNA		AB052157	-13								433	0	27886	28319	1	0.015	0	2.309						1					124.236	0.287			-1.05726	0.0172613		TCONS_00023188	XLOC_018075
AK006795	ncRNA		AK006269	-103							AK006269,AK014879,AK029752,AK029764,AK139789,AK145332,NM_001146001,NM_001163496,NM_001163497	2224	0	0	2225	0	1	0	0			4								156.929	0.071			-1.20237	0.035748	-305.591	TCONS_00018553	XLOC_014310
AK006813	ncRNA								AK076706		AF003747,AK134245,AK166106,BC117997,NM_011774	568	0	0	568	0	1	0	0			3								17.174	0.03			-1.04492	0.0155731		TCONS_00016833	XLOC_013024
AK006816	ncRNA									NM_001038663		1043	0	549	1592	1	0.655	0	0.959			2								69.479	0.067			-1.32232	0.0102636		TCONS_00010762	XLOC_008301
AK006821	ncRNA						AK036270,BC138175,NM_001081161,BC145171	AK036270				429	0	0	429	0	1	0	0					1						12.691	0.03				0.0824876	-307.603	TCONS_00014856	XLOC_011471
AK006822	ncRNA									AK014912		1480	0	0	1480	0	1	0	0			1		1	1					96.823	0.065			-1.14539	0.0723014		TCONS_00015897	XLOC_012284
AK006824	ncRNA	TRUE										506	0	16345	16851	2	0.03	0	3.953					2	1	uc008jqi.1		AK006824	Mus musculus adult male testis cDNA, RIKEN full-length enriched library, clone:1700057H21 product:unclassifiable, full insert sequence.	15.544	0.031			-0.970255	0.118811	23.8105	TCONS_00016415	XLOC_012686
AK006832	ncRNA		AK161431	-92						AK138039		950	0	0	950	0	1	0	0			1		1						23.336	0.025			-1.32396	0.0268495		TCONS_00016913	XLOC_013092
AK006833	ncRNA	TRUE										343	0	0	343	0	1	0	0						2					0.139	0			-0.954359	0.0464228		TCONS_00025806	XLOC_020146
AK006834	ncRNA	TRUE							AK006343			1219	0	9662	10881	1	0.112	0	0.82			1		1						248.404	0.204			-0.922917	0.0900541	-51.6023	TCONS_00007778	XLOC_005984
AK006836	ncRNA				AK217126	842			BC010223	NM_207525		413	0	835	1248	1	0.331	0	2.421	1		1		2	1					48.128	0.117			-0.926781	0.0211096		TCONS_00024210	XLOC_018910
AK006839	ncRNA				NM_177657	9			NM_001131021			594	0	3137	3731	2	0.159	0	3.367					1						123.439	0.208			3.68055	0.0820582	-24.0708	TCONS_00015905	XLOC_012291
AK006843	ncRNA				AY249866	-468			NM_133891			1060	0	655	1715	1	0.618	0	0.943											390.685	0.369			-0.845201	0.0928224	11.0121	TCONS_00019940	XLOC_015454
AK006847	ncRNA										AF425647,AK004647,AK013943,AK020471,AK050651,AK088633,AK088793,AK145858,AK167795,AK168514,AK205475,BC026560,BC046225,BC058726,BC094357,D00472,NM_007687,NM_027877	455	0	0	455	0	1	0	0					1	1					74.569	0.164			-0.950472	0.107528	-237.55	TCONS_00014391	XLOC_011133
AK006849	ncRNA	TRUE										406	0	0	406	0	1	0	0					1						292.787	0.721			-1.10059	0.122907		TCONS_00021939	XLOC_017127
AK006850	ncRNA		AK030193	-89			AF531172	AF531172				352	0	13293	13645	1	0.026	0	2.841						1					15.972	0.045			-1.16376	0.0104169		TCONS_00021617	XLOC_016847
AK006851	ncRNA								AK029025			587	0	425	1013	1	0.58	0	1.704			1		1						59.012	0.101				0.0302324		TCONS_00006877	XLOC_005358
AK006853	ncRNA		AK015414	-67					AK078964	BC018443		634	0	25656	26290	1	0.024	0	1.577	1		2		1						65.363	0.103			-1.19793	0.00200611		TCONS_00013778	XLOC_010696
AK006857	ncRNA	TRUE										537	0	13699	14236	2	0.038	0	3.724					1						47.754	0.089			-1.19929	0.0362001		TCONS_00003536	XLOC_002855
AK006859	ncRNA									AK185372		459	0	6035	6494	1	0.071	0	2.179					1	1	uc009lrk.1		AK006859	Mus musculus adult male testis cDNA, RIKEN full-length enriched library, clone:1700061N14 product:unclassifiable, full insert sequence.	30.127	0.066			-0.982868	0.0569733	-66.8229	TCONS_00026796	XLOC_020841
AK006860	ncRNA	TRUE										396	0	36078	36474	1	0.011	0	2.525			1		1	1									0.75777	0.11135		TCONS_00008885	XLOC_006791
AK006868	ncRNA								AK049619.4			711	0	0	711	0	1	0	0	2		3		1						41.338	0.058			-1.15382	0.0154244		TCONS_00008312	XLOC_006315
AK006870	ncRNA	TRUE										445	0	2748	3193	1	0.139	0	2.247			2		1	1	uc009qvr.1		AK006870	Mus musculus adult male testis cDNA, RIKEN full-length enriched library, clone:1700063H06 product:unclassifiable, full insert sequence.	26.381	0.059			-1.20293	0.0364778		TCONS_00027737	XLOC_021631
AK006872	ncRNA		AK171742	-83						AK035731	AK010404,AK030202,AK088807,AK168440,AK171742,BC048161,BC052712,NM_025888	522	0	0	522	0	1	0	0											35.043	0.067			-1.057	0.0418256		TCONS_00012438	XLOC_009672
AK006873	ncRNA	TRUE										952	0	21248	22200	5	0.043	0	5.252	1		1		2	1					435.434	0.457			-0.730596	0.134692		TCONS_00011670	XLOC_009047
AK006880	ncRNA									BC028821		458	0	317	775	1	0.591	0	2.183			1								25.615	0.056			-0.89595	0.106952	-36.0491	TCONS_00026262	XLOC_020509
AK006881	ncRNA				AK005725	-365						393	0	17916	18310	1	0.022	0	2.545					1	1					49.543	0.126				0.0973689	-209.657	TCONS_00018054	XLOC_013989
AK006896	ncRNA											635	0	33422	34057	4	0.019	0	6.299					1		uc009cjn.1		AK006896	Mus musculus adult male testis cDNA, RIKEN full-length enriched library, clone:1700065L07 product:unclassifiable, full insert sequence.	91.014	0.143			-0.980345	0.0704254	-60.8455	TCONS_00023632	XLOC_018427
AK006899	ncRNA	TRUE										263	0	4640	4903	2	0.054	0	7.605						1	uc007atq.1		AK006899	Mus musculus adult male testis cDNA, RIKEN full-length enriched library, clone:1700066B17 product:unclassifiable, full insert sequence.	17.409	0.066			-1.26652	0.0787977		TCONS_00001195	XLOC_000892
AK006903	ncRNA	TRUE										515	0	1511	2026	1	0.254	0	1.942			1		1	1					69.054	0.134			-1.11548	0.105576		TCONS_00006976	XLOC_005442
AK006909	ncRNA		AK005868	-51								334	0	27420	27754	2	0.012	0	5.988							uc008eze.1		AK006909	Mus musculus adult male testis cDNA, RIKEN full-length enriched library, clone:1700066O22 product:unclassifiable, full insert sequence.	32.841	0.098			-1.10174	0.0244342		TCONS_00013700	XLOC_010636
AK006910	ncRNA	TRUE										571	0	0	571	0	1	0	0					1	1					62.934	0.11			-1.09176	0.00664046		TCONS_00008404	XLOC_006395
AK006912	ncRNA		AK182599	148	BC127166	-264			AK053258			484	0	0	484	0	1	0	0						1					102.302	0.211			-1.26293	0.0263171		TCONS_00017174	XLOC_013284
AK006913	ncRNA	TRUE										383	0	944	1327	1	0.289	0	2.611											30.442	0.079	TRUE		-0.967709	0.0242284		TCONS_00003782	XLOC_003065
AK006915	ncRNA								AK152089			480	0	0	480	0	1	0	0						1					48.459	0.101			-0.778496	0.121139		TCONS_00004749	XLOC_003817
AK006921	ncRNA								BC145057			515	0	91	606	1	0.85	0	1.942			1		1		uc008rpz.1		AK006921	Mus musculus adult male testis cDNA, RIKEN full-length enriched library, clone:1700069H09 product:unclassifiable, full insert sequence.	113.998	0.221				0.220644	-29.7168	TCONS_00017959	XLOC_013907
AK006922	ncRNA		BC014798	148							AK004574,AK146076,AK171136,BC014798,NM_025816	610	0	0	610	0	1	0	0			1		1	1					91.355	0.15			-1.28696	0.0273935		TCONS_00023549	XLOC_018360
AK006930	ncRNA								NM_028194			363	0	504	867	1	0.419	0	2.755					1		uc008xsq.1		AK006930	Mus musculus adult male testis cDNA, RIKEN full-length enriched library, clone:1700071G01 product:unclassifiable, full insert sequence.	12.713	0.035			-1.46429	0.0222611		TCONS_00020876	XLOC_016231
AK006933	ncRNA								AK155678	NM_001161366		545	0	728	1273	1	0.428	0	1.835			1			1	uc008cph.1		AK006933	Mus musculus adult male testis cDNA, RIKEN full-length enriched library, clone:1700071M16 product:unclassifiable, full insert sequence.	32.179	0.059			-1.07774	0.0480064		TCONS_00012527	XLOC_009739
AK006936	ncRNA	TRUE										839	0	0	839	0	1	0	0											6.807	0.008			-0.982061	0.119682		TCONS_00006975	XLOC_005441
AK006937	ncRNA									AK028936		546	0	452	998	1	0.547	0	1.832					1	1	uc007axl.1		AK006937	Mus musculus adult male testis cDNA, RIKEN full-length enriched library, clone:1700072G22 product:unclassifiable, full insert sequence.	41.408	0.076			-1.11361	0.0495522		TCONS_00001226	XLOC_000919
AK006939	ncRNA											580	0	12087	12667	3	0.046	0	5.172			1								160.281	0.276			-1.06083	0.113066		TCONS_00020519	XLOC_015946
AK006943	ncRNA								AK035947			381	0	14202	14583	1	0.026	0	2.625			1				uc009erm.1		AK006943	Mus musculus adult male testis cDNA, RIKEN full-length enriched library, clone:1700073E17 product:unclassifiable, full insert sequence.	27.203	0.071			-1.19995	0.0513427		TCONS_00023256	XLOC_018125
AK006945	ncRNA	TRUE	AK031335	-100							AB182640,AK031335,AK088800,AK146080,BC040385,NM_153594	383	0	0	383	0	1	0	0											37.005	0.097			-1.2952	0.0116864		TCONS_00017257	XLOC_013334
AK006946	ncRNA	TRUE	NM_030266	-195							AK149414,NM_030266	346	0	0	346	0	1	0	0			1								6.723	0.019			-1.18061	0.00394493		TCONS_00001171	XLOC_000869
AK006948	ncRNA		BC098484	-7							AK019714,AK030012,BC098484,NM_001081253	556	0	0	556	0	1	0	0					1						15.977	0.029			1.9157	0.0232406		TCONS_00009676	XLOC_007441
AK006950	ncRNA						AK009783,AK010162,BC054841,AK038986,AF249667,BC094250,NM_020012,NM_001164622,AK011316,NM_001164621,BC049079	AK010162			AF249668	399	0	0	399	0	1	0	0			2								23.547	0.059				0.0234049		TCONS_00013146	XLOC_010199
AK006954	ncRNA								FM872409			917	0	6017	6935	1	0.132	0	1.091			1		1	3					84.676	0.092			-0.872948	0.0581141	-207.487	TCONS_00023104	XLOC_018011
AK006955	ncRNA	TRUE										436	0	828	1264	1	0.345	0	2.294					1	1					17.376	0.04			-1.04396	0.0656289		TCONS_00019513	XLOC_015088
AK006960	ncRNA											782	0	2053	2835	1	0.276	0	1.279	1				1	1					435.938	0.557				0.0415021		TCONS_00008713	XLOC_006657
AK006961	ncRNA	TRUE										310	0	4576	4886	1	0.063	0	3.226							uc008zrv.1		AK006961	Mus musculus adult male testis cDNA, RIKEN full-length enriched library, clone:1700081B01 product:unclassifiable, full insert sequence.	30.938	0.1			-1.29171	0.014204		TCONS_00021242	XLOC_016537
AK006966	ncRNA	TRUE										1128	0	5182	6310	3	0.179	0	2.66											133.023	0.118			-0.889416	0.0498825	-35.8745	TCONS_00021180	XLOC_016485
AK006973	ncRNA		AK013994	-103								507	0	167	674	1	0.752	0	1.972					1	1	uc007nny.1		AK006973	Mus musculus adult male testis cDNA, RIKEN full-length enriched library, clone:1700081N11 product:unclassifiable, full insert sequence.	103.965	0.205			-1.04665	0.0244479		TCONS_00005432	XLOC_004379
AK006976	ncRNA						BC138177,BC138178,AK032208,AK029683,NM_178886,BC145174,AK136473	BC145174			AK032208	705	0	0	705	0	1	0	0			1								170.644	0.242			-0.773643	0.0429767		TCONS_00016672	XLOC_012906
AK006980	ncRNA	TRUE										2022	0	3809	5831	2	0.347	0	0.989	1		2				uc009nbb.1		AK006980	Mus musculus adult male testis cDNA, RIKEN full-length enriched library, clone:1700082M22 product:unclassifiable, full insert sequence.	16.332	0.008				0.10821		TCONS_00026198	XLOC_020464
AK006981	ncRNA								NM_001159510		AK218030	437	0	0	437	0	1	0	0											6.626	0.015			-0.730282	0.093626	-144.985	TCONS_00009927	XLOC_007625
AK006982	ncRNA		BC024129	469					AK039570			892	0	2239	3131	2	0.285	0	2.242											328.727	0.369			-1.06501	0.0634843		TCONS_00014738	XLOC_011384
AK006986	ncRNA		BC108392	233			AK156871	AK156871		AK156871		750	0	35889	36639	1	0.02	0	1.333					2	4					214.801	0.286			2.9588	0.0602707		TCONS_00027322	XLOC_021283
AK006989	ncRNA	TRUE										442	0	7486	7928	2	0.056	0	4.525					1						18.078	0.041			0.75296	0.172809		TCONS_00007436	XLOC_005715
AK006995	ncRNA	TRUE	AK076939	129								880	0	0	884	0	1	0	0			1			1					93.717	0.106			1.58865	0.0116058		TCONS_00014235	XLOC_011004
AK006996	ncRNA								BC113153			843	0	1510	2353	3	0.358	0	3.559							uc007vyv.1		AK006996	Mus musculus adult male testis cDNA, RIKEN full-length enriched library, clone:1700084L08 product:unclassifiable, full insert sequence.	101.397	0.12			1.67737	0.0742122		TCONS_00009818	XLOC_007531
AK006998	ncRNA									AK011719		385	0	0	385	0	1	0	0			2		1	1					33.79	0.088			-1.04084	0.0196184	-263.33	TCONS_00011732	XLOC_009099
AK007000	ncRNA		AK192449	-5								618	0	6098	6716	1	0.092	0	1.618											320.446	0.519				0.230954	26.3158	TCONS_00024215	XLOC_018913
AK007003	ncRNA		BC042901	-414							AF297221,AK002834,AK014214,BC011488,BC042901,NM_022024,NM_175021	348	0	0	348	0	1	0	0					1						125.351	0.36			0.3393	0.0705965		TCONS_00024260	XLOC_018951
AK007005	ncRNA								AK145655.3			321	0	14257	14578	1	0.022	0	3.115					1	1					29.337	0.091			-1.1244	0.0282101		TCONS_00009837	XLOC_007548
AK007006	ncRNA	TRUE										1153	0	4555	5708	1	0.202	0	0.867			1		1	1	uc007uyf.1		AK007006	Mus musculus adult male testis cDNA, RIKEN full-length enriched library, clone:1700085D13 product:hypothetical protein, full insert sequence.	32.627	0.028			0.175825	0.0173041		TCONS_00009461	XLOC_007255
AK007008	ncRNA	TRUE										414	0	0	414	0	1	0	0					1						22.769	0.055			-0.82671	0.0287797		TCONS_00020404	XLOC_015855
AK007010	ncRNA		BC021152	422			M10062	M10062			AK049680,AK088112,AK088671,AK133914,BC019412,BC021152,BC046814,NM_001102458,NM_018745	1275	0	0	1279	0	1	0	0			1								348.834	0.274			-1.22058	0.226738	130.355	TCONS_00009687	XLOC_007451
AK007019	ncRNA								AK157408	AK002381		440	0	409	849	1	0.518	0	2.273						1					116.664	0.265			-0.957464	0.193408		TCONS_00004976	XLOC_004015
AK007023	ncRNA		NM_024179	-48				AK039796		AK090216		579	0	0	579	0	1	0	0			2		1						63.056	0.109	TRUE		-1.20369	0.0233821		TCONS_00013602	XLOC_010563
AK007025	ncRNA	TRUE										406	0	43510	43916	2	0.009	0	4.926							uc008fvz.1		AK007025	Mus musculus adult male testis cDNA, RIKEN full-length enriched library, clone:1700030N03 product:unclassifiable, full insert sequence.	8.873	0.022			-1.19915	0.0245881		TCONS_00014362	XLOC_011110
AK007026	ncRNA		AY325887	-140								789	0	13101	13890	2	0.057	0	2.535					1	1					327.07	0.415			-0.921742	0.237714	-53.9865	TCONS_00008736	XLOC_006678
AK007029	ncRNA		BC055457	493							AK007547,AK012951,AK051738,AK076002,AK089942,AK136049,AK140773,AK145731,AK166950,AK167559,AK168289,BC037590,BC055457,BC090664,BC090980,BC100595,BC119136,BC119138,NM_178616	1444	0	0	1444	0	1	0	0			1		1						351.399	0.243			-1.34428	0.247565	85.1866	TCONS_00004807	XLOC_003867
AK007030	ncRNA								AK147503			387	0	2421	2808	1	0.138	0	2.584							uc007bza.2		4933400F21Rik	Mus musculus adult male testis cDNA, RIKEN full-length enriched library, clone:1700091C04 product:unclassifiable, full insert sequence.	32.257	0.083			-1.29359	0.0304527		TCONS_00001441	XLOC_001108
AK007031	ncRNA											381	0	76119	76500	2	0.005	0	5.249			2		1						39.803	0.104				0.0639102		TCONS_00013740	XLOC_010666
AK007034	ncRNA	TRUE										244	0	0	244	0	1	0	0											17.077	0.07			-1.23511	0.0502088		TCONS_00020349	XLOC_015807
AK007040	ncRNA									AK015500		753	0	0	753	0	1	0	0					1						53.242	0.071			-0.861977	0.0804578	-139.509	TCONS_00002396	XLOC_001919
AK007041	ncRNA	TRUE										588	0	6015	6603	2	0.089	0	3.401			1		1		uc007pwz.1		AK007041	Mus musculus adult male testis cDNA, RIKEN full-length enriched library, clone:1700092E19 product:unclassifiable, full insert sequence.	47.313	0.08				0.0754537		TCONS_00007600	XLOC_005847
AK007045	ncRNA								AK014409.1	NM_001033178		505	0	1397	1902	1	0.266	0	1.98					1	1					71.156	0.141			-1.27729	0.0248199		TCONS_00011827	XLOC_009175
AK007047	ncRNA		NM_001200023	270					AK043654		AK162670,Guttman10_novel_lincs_TCONS_00002666,NM_001200023	934	0	0	934	0	1	0	0			1		1	1					197.15	0.211			-1.17232	0.123699		TCONS_00026009	XLOC_020312
AK007049	ncRNA								AK155442			765	0	0	765	0	1	0	0			1		1	1					158.517	0.207			-0.995945	0.0213075		TCONS_00017219	XLOC_013309
AK007057	ncRNA								AK145298			506	0	14958	15464	1	0.033	0	1.976			3		1						110.852	0.219			-1.29796	0.0123367		TCONS_00020884	XLOC_016237
AK007062	ncRNA								DQ192036			503	0	13113	13616	1	0.037	0	1.988											201.684	0.401				0.064843		TCONS_00008660	XLOC_006612
AK007066	ncRNA								AK079648			553	0	0	553	0	1	0	0			3		1	1					31.015	0.056			-0.957934	0.0687407	-102.654	TCONS_00029922	XLOC_023220
AK007071	ncRNA									NM_011372		675	0	19413	20088	3	0.034	0	4.444			1								37.008	0.055				0.101908		TCONS_00018875	XLOC_014564
AK007073	ncRNA	TRUE										681	0	622	1303	1	0.523	0	1.468							uc008fuj.1		AK007073	Mus musculus adult male testis cDNA, RIKEN full-length enriched library, clone:1700095A13 product:unclassifiable, full insert sequence.	15.902	0.023			-0.806565	0.0222223		TCONS_00013902	XLOC_010785
AK007077	ncRNA									NM_010580		865	0	205	1071	1	0.809	0	1.156					1	2					133.611	0.154			-0.974153	0.0131313		TCONS_00010897	XLOC_008404
AK007083	ncRNA		NM_009459	-65								587	0	2575	3162	1	0.186	0	1.704			3			1	uc009bfb.1		AK007083	Mus musculus adult male testis cDNA, RIKEN full-length enriched library, clone:1700095J07 product:unclassifiable, full insert sequence.	118.313	0.202			-0.794676	0.110223	-265.601	TCONS_00022535	XLOC_017578
AK007084	ncRNA								NM_001256195			737	0	187	924	1	0.798	0	1.357					1		uc008vke.1		AK007084	Mus musculus adult male testis cDNA, RIKEN full-length enriched library, clone:1700095J12 product:unclassifiable, full insert sequence.	78.345	0.106			-1.01629	0.0131214	20.2326	TCONS_00020379	XLOC_015836
AK007093	ncRNA		AK076783	-144								737	0	17894	18631	4	0.04	0	5.427			1								32.003	0.043			-0.627398	0.0186727		TCONS_00028541	XLOC_022298
AK007095	ncRNA									BC059234		409	0	5676	6085	1	0.067	0	2.445					1		uc009mqu.1		AK007095	Mus musculus adult male testis cDNA, RIKEN full-length enriched library, clone:1700096P03 product:unclassifiable, full insert sequence.	2.007	0.005			-1.122	0.0429283	-51.4201	TCONS_00027029	XLOC_021049
AK007098	ncRNA	TRUE										1224	0	0	1225	0	1	0	0			3		1	1					250.608	0.205			-0.92406	0.0158866		TCONS_00023655	XLOC_018449
AK007100	ncRNA								NM_175171			668	0	965	1633	1	0.409	0	1.497							uc007rsc.1		AK007100	Mus musculus adult male testis cDNA, RIKEN full-length enriched library, clone:1700099I09 product:unclassifiable, full insert sequence.	359.24	0.538			-1.15298	0.0257004		TCONS_00007351	XLOC_005651
AK007101	ncRNA	TRUE										836	0	4886	5722	1	0.146	0	1.196			1		1	1					31.625	0.038				0.0174018		TCONS_00009462	XLOC_007255
AK007103	ncRNA		AK040612	-311			BC078639	BC078639		BC078639		743	0	0	743	0	1	0	0					1	1					171.692	0.231			-1.18923	0.0179195	-65.6598	TCONS_00015625	XLOC_012071
AK007104	ncRNA		BC062099	-492							AF211854,AK133006,AK137387,BC062099,NM_133649	652	0	0	652	0	1	0	0					1						139.078	0.213			-1.19275	0.0217397	-144.595	TCONS_00016753	XLOC_012954
AK007108	ncRNA	TRUE	NM_213727	-81							BC070435,NM_213727	410	0	0	410	0	1	0	0					1	2					4.273	0.01			2.37988	0.0420852		TCONS_00001158	XLOC_000857
AK007111	ncRNA	TRUE										670	0	0	670	0	1	0	0			1		1						54.661	0.082				0.134197	-12.9097	TCONS_00023224	XLOC_018099
AK007112	ncRNA	TRUE										757	0	4857	5614	2	0.135	0	2.642							uc009jzq.1		AK007112	Mus musculus adult male testis cDNA, RIKEN full-length enriched library, clone:1700102J08 product:unclassifiable, full insert sequence.	100.436	0.133			-1.0102	0.0553993	-10.502	TCONS_00025611	XLOC_019988
AK007113	ncRNA		AK207813	90							AF038994,AK011890,AK150821,BC013450,BC013620,BC029747,BC031472,BC049977,BC061634,BC106143,M60419,M62867,NM_011732,U33196,U33197,X57621	1010	0	0	1011	0	1	0	0			2								529.135	0.524			-0.944921	0.397932	148.568	TCONS_00019457	XLOC_015042
AK007116	ncRNA											598	0	2594	3192	1	0.187	0	1.672					1	1	uc009pqw.1		AK007116	Mus musculus adult male testis cDNA, RIKEN full-length enriched library, clone:1700104A03 product:unclassifiable, full insert sequence.	110.871	0.185			-0.951764	0.0590782		TCONS_00027523	XLOC_021447
AK007117	ncRNA		BC128371	344							AF057157,AK145528,BC055362,BC128370,BC128371,NM_007525	915	0	0	915	0	1	0	0					1						126.885	0.139			-1.09708	0.0465371		TCONS_00000303	XLOC_000258
AK007118	ncRNA						BC066875	BC066875	AK011687			1094	0	26766	27860	2	0.039	0	1.828			3			1	uc008vsg.1		AK007118	Mus musculus adult male testis cDNA, RIKEN full-length enriched library, clone:1700095A21 product:unclassifiable, full insert sequence.	30.827	0.028			-1.25578	0.0201586		TCONS_00019646	XLOC_015197
AK007119	ncRNA									NM_009942		393	0	0	393	0	1	0	0			1		1						13.013	0.033			-0.605413	0.114471	-55.837	TCONS_00000112	XLOC_000102
AK007120	ncRNA	TRUE										598	0	8108	8706	2	0.069	0	3.344			2								231.538	0.387			0.839808	0.0224555		TCONS_00005431	XLOC_004378
AK007124	ncRNA	TRUE										297	0	0	297	0	1	0	0											2.414	0.008	TRUE		-1.17065	0.020272		TCONS_00009302	XLOC_007128
AK007126	ncRNA	TRUE	AK019736	-150								411	0	1159	1570	1	0.262	0	2.433					1	1					112.966	0.275			-0.777938	0.0271058		TCONS_00005680	XLOC_004587
AK007128	ncRNA									AK142601		807	0	0	807	0	1	0	0			1								25.221	0.031			-0.814486	0.0947437	-52.8056	TCONS_00014311	XLOC_011068
AK007131	ncRNA	TRUE										437	0	1541	1978	1	0.221	0	2.288											15.243	0.035				0.025291		TCONS_00012232	XLOC_009504
AK007136	ncRNA	TRUE							Guttman11_TCONS_00000984		AK155946	356	0	0	356	0	1	0	0					1	1									-1.16772	0.00984699		TCONS_00020319	XLOC_015780
AK007144	ncRNA		AB101296	-93							AB101294,AB101295,AB101296,AK007360,AK167697,AY090537,AY090538,BC031771,BC057210,BC094445,NM_026924,NM_152947	849	0	0	850	0	1	0	0			1		1						420.932	0.496			-1.03466	0.133634	-87.3953	TCONS_00015815	XLOC_012215
AK007154	ncRNA								DQ017389	BC113126		1090	0	10827	11917	2	0.091	0	1.835			2		1		uc007wnj.1		AK007154	Mus musculus adult male testis cDNA, RIKEN full-length enriched library, clone:1700109K24 product:unclassifiable, full insert sequence.	277.046	0.254			-1.10201	0.0197218	-22.8914	TCONS_00009865	XLOC_007571
AK007158	ncRNA	TRUE							AK006406		AK006495,BC048494,BC061170,NM_009407	734	0	0	734	0	1	0	0					1						38.04	0.052			-1.1842	0.022703		TCONS_00001359	XLOC_001036
AK007160	ncRNA								BC119562			726	0	28501	29227	3	0.025	0	4.132					1						10.216	0.014			-0.389645	0.11115		TCONS_00025039	XLOC_019584
AK007172	ncRNA											1133	0	213197	214330	8	0.005	0	7.061			1		1						149.264	0.132			-1.16547	0.0145977		TCONS_00029657	XLOC_023054
AK007174	ncRNA		NM_177586	-610								477	0	41444	41921	2	0.011	0	4.193					2	1	uc008ouc.1		AK007174	Mus musculus adult male testis cDNA, RIKEN full-length enriched library, clone:1700112D23 product:unclassifiable, full insert sequence.	7.96	0.017			-1.29482	0.0212067		TCONS_00018115	XLOC_014042
AK007179	ncRNA		AK015716	-287						U30823		811	0	2063	2874	1	0.282	0	1.233			1			1					0.163	0			-1.20112	0.110176		TCONS_00025258	XLOC_019709
AK007180	ncRNA	TRUE										701	0	835	1536	1	0.456	0	1.427					1	1					158.239	0.226			-0.936526	0.0601215	-34.2492	TCONS_00020301	XLOC_015763
AK007181	ncRNA		AK208619	43							AK004829,BC037638,BC141081,M23568,NM_011626	885	0	0	885	0	1	0	0						1					208.275	0.235			-0.701324	0.696087	-35.9903	TCONS_00021822	XLOC_017024
AK007183	ncRNA						BC060957,NM_172914,AK077130	AK077130	AK135829			504	0	0	504	0	1	0	0											11.835	0.023			-1.12528	0.0244963		TCONS_00026178	XLOC_020449
AK007185	ncRNA	TRUE										348	0	124756	125104	1	0.003	0	2.874					1		uc007rdc.1		AK007185	Mus musculus adult male testis cDNA, RIKEN full-length enriched library, clone:1700112M02 product:unclassifiable, full insert sequence.	24.211	0.07			-1.08542	0.0326691		TCONS_00007176	XLOC_005509
AK007191	ncRNA	TRUE			AK032042	-493						1088	0	5135	6223	2	0.175	0	1.838			1		1	2	uc008pue.1		AK007191	Mus musculus adult male testis cDNA, RIKEN full-length enriched library, clone:1700113A16 product:unclassifiable, full insert sequence.	455.206	0.418			-1.14537	0.0311811	-14.7494	TCONS_00018483	XLOC_014260
AK007192	ncRNA	TRUE										414	0	0	414	0	1	0	0					1	1					51.979	0.126			-1.21331	0.0256951		TCONS_00000705	XLOC_000506
AK007196	ncRNA	TRUE										467	0	0	467	0	1	0	0															-0.995473	0.0362189		TCONS_00000060	XLOC_000054
AK007199	ncRNA	TRUE										430	0	1467	1897	1	0.227	0	2.326						1					5.836	0.014			-1.14291	0.0159166		TCONS_00012306	XLOC_009569
AK007203	ncRNA		BC119273	443	NM_172470	586					AK005950,AK078146,AK144458,BC119273,NM_029321	1022	0	0	1022	0	1	0	0			1								145.648	0.143			-1.19939	0.495026		TCONS_00006030	XLOC_004753
AK007204	ncRNA	TRUE							BC128340			352	0	8915	9267	1	0.038	0	2.841			1		1		uc008dvj.1		AK007204	Mus musculus adult male testis cDNA, RIKEN full-length enriched library, clone:1700116H05 product:unclassifiable, full insert sequence.	41.293	0.117			-0.961312	0.026343		TCONS_00012870	XLOC_009978
AK007205	ncRNA									AF111101		1137	0	5486	6623	2	0.172	0	1.759			2				uc009fbt.1		AK007205	Mus musculus imprinted zinc-finger 2 gene, partial sequence.	133.219	0.117			0.0458912	0.174588	-8.6239	TCONS_00024916	XLOC_019476
AK007210	ncRNA		AF015309	124						BC145145		389	0	9866	10255	2	0.038	0	5.141					3	3	uc007xpe.1		AK007210	Mus musculus adult male testis cDNA, RIKEN full-length enriched library, clone:1700120C14 product:unclassifiable, full insert sequence.	142.298	0.366			-1.14598	0.0256177		TCONS_00010037	XLOC_007711
AK007211	ncRNA	TRUE							Belgard_TCONS_00808444			985	0	198	1183	1	0.833	0	1.015					1	1					97.454	0.099	TRUE		-1.11895	0.042093	-352.4	TCONS_00027028	XLOC_021048
AK007213	ncRNA		AB048860	-47			AK083120	AK083120	AK145264		AB048860,AK015980,BC116291,BC116292,NM_029212	712	0	0	712	0	1	0	0											69.684	0.098			-1.24489	0.132077		TCONS_00027550	XLOC_021474
AK007217	ncRNA	TRUE										491	0	17464	17955	1	0.027	0	2.037											13.163	0.027			-0.730684	0.00507701		TCONS_00019775	XLOC_015313
AK007219	ncRNA								AK053013			977	0	10058	11035	1	0.089	0	1.024			1		1	1					43.458	0.044			-0.910681	0.132775	-57.6577	TCONS_00009214	XLOC_007054
AK007223	ncRNA		AK016093	-81					BC075620			756	0	503	1259	1	0.6	0	1.323					1		uc008vwe.1		AK007223	Mus musculus adult male testis cDNA, RIKEN full-length enriched library, clone:1700121F15 product:unclassifiable, full insert sequence.	93.932	0.124			-1.14101	0.0653073		TCONS_00019664	XLOC_015215
AK007225	ncRNA				BC011344	6					AF458961,AK004641,AK005200,AK005998,AK006755,AK007723,AK008645,AK011223,AK015662,AK145381,AK151056,AK151827,AK153504,AK186250,AK213555,AK219809,BC011344,BC054774,BC116931,BC119038,NM_144948,NR_037589.1	379	0	0	379	0	1	0	0					1						37.035	0.098			-1.23863	0.0871019		TCONS_00028265	XLOC_022061
AK007229	ncRNA	TRUE							AK147745			704	0	6470	7174	1	0.098	0	1.42			2		1						178.199	0.253			-1.11997	0.0941278	-6.9175	TCONS_00001547	XLOC_001197
AK007236	ncRNA								BC072561			421	0	1998	2419	1	0.174	0	2.375					1	1					90.741	0.216			-1.02325	0.0256376		TCONS_00001276	XLOC_000962
AK007237	ncRNA		NM_007591	-316						NM_183358		419	0	749	1168	1	0.359	0	2.387					1	1	uc009mnq.1		AK007237	Mus musculus adult male testis cDNA, RIKEN full-length enriched library, clone:1700122E12 product:unclassifiable, full insert sequence.	22.269	0.053			-1.03601	0.035473		TCONS_00026107	XLOC_020391
AK007238	ncRNA	TRUE	NR_030465	-602								420	0	5358	5778	1	0.073	0	2.381			1		1		uc008ahx.1		AK007238	Mus musculus adult male testis cDNA, RIKEN full-length enriched library, clone:1700122H20 product:unclassifiable, full insert sequence.	30.349	0.072				0.0843659		TCONS_00011832	XLOC_009180
AK007243	ncRNA								BC158043	AK040202		570	0	3057	3627	2	0.157	0	3.509					1	1					34.676	0.061			-1.03082	0.0816932		TCONS_00026340	XLOC_020580
AK007248	ncRNA	TRUE										704	0	0	704	0	1	0	0					2	3					26.3	0.037			-1.17995	0.0845596		TCONS_00026725	XLOC_020775
AK007252	ncRNA	TRUE										381	0	11727	12108	3	0.031	0	7.874					1						22.672	0.06			-0.970432	0.0124127		TCONS_00025572	XLOC_019956
AK007259	ncRNA		BC009005	215							AB029142,AB029143,AB029144,AB029145,AB029146,AF013099,AF175574,AK010969,AK145524,BC009005,BC016433,NM_008951	603	0	0	603	0	1	0	0			1		1	1					158.62	0.263			-1.14367	0.0648143	60.7862	TCONS_00017672	XLOC_013670
AK007271	ncRNA		NM_029245	-152						AK157834	AK016222,AK133099,NM_029245	735	0	0	735	0	1	0	0			2		1						166.909	0.227			0.632516	0.0999497		TCONS_00023684	XLOC_018467
AK007272	ncRNA	TRUE										305	0	344	649	1	0.47	0	3.279			1								22.643	0.074			-0.94936	0.114152		TCONS_00002777	XLOC_002229
AK007274	ncRNA	TRUE										683	0	7169	7852	4	0.087	0	5.857			1		1	1	uc009rsq.1		AK007274	Mus musculus adult male testis cDNA, RIKEN full-length enriched library, clone:1700124P09 product:unclassifiable, full insert sequence.	24.645	0.036			3.56273	0.0482308		TCONS_00028676	XLOC_022409
AK007275	ncRNA		NM_008903	-62							AK077275,AY158694,AY158695,AY247795,AY247796,BC061161,D84376,L43371,NM_008247,NM_008903	351	0	0	351	0	1	0	0											22.043	0.063			-1.08206	0.0366004		TCONS_00008266	XLOC_006277
AK007284	ncRNA	TRUE										568	0	0	568	0	1	0	0			2		1	1					59.071	0.104			-1.02562	0.0235322	-65.0446	TCONS_00029738	XLOC_023120
AK007286	ncRNA		AK153959	-117						AY364436		517	0	4462	4979	1	0.104	0	1.934					1	1					123.345	0.239			-1.0397	0.136542		TCONS_00027500	XLOC_021427
AK007287	ncRNA	TRUE										2062	0	0	2062	0	1	0	0			1		1						83.194	0.04				0.0832033		TCONS_00000211	XLOC_000179
AK007288	ncRNA								AK031560			725	0	19327	20052	4	0.036	0	5.517			2		1						222.786	0.307			-1.06328	0.0593148		TCONS_00024087	XLOC_018805
AK007289	ncRNA	TRUE										484	0	0	484	0	1	0	0						1					34.769	0.072			-0.956546	0.0445366	-29.1721	TCONS_00009147	XLOC_007008
AK007300	ncRNA	TRUE							AK028463			500	0	0	500	0	1	0	0			1												-1.48606	0.021901		TCONS_00013774	XLOC_010692
AK007305	ncRNA	TRUE										856	0	68474	69330	3	0.012	0	3.505					1	1	uc007uyb.1		AK007305	Mus musculus adult male testis cDNA, RIKEN full-length enriched library, clone:1700128A07 product:unclassifiable, full insert sequence.	21.592	0.025			-1.05078	0.0260052		TCONS_00009447	XLOC_007244
AK007306	ncRNA		BC092540	-66	BC006585	4			BC005659	NM_172395		316	0	0	316	0	1	0	0			1		1	1					19.633	0.062			-0.659891	0.0104437		TCONS_00017674	XLOC_013672
AK007311	ncRNA	TRUE										701	0	0	701	0	1	0	0						1					191.253	0.273			-1.01023	0.0457395		TCONS_00009078	XLOC_006953
AK007312	ncRNA	TRUE										554	0	563	1117	2	0.496	0	3.61					1		uc009fcd.1		Zim3	Mus musculus Kruppel-type zinc-finger protein ZIM3-like mRNA, complete sequence.	183.589	0.331			-1.29726	0.129295	59.4377	TCONS_00024921	XLOC_019478
AK007316	ncRNA						AK039790	AK039790				1321	0	63452	64773	3	0.02	0	2.271	1		1				uc007xjp.2		LOC100043315	Mus musculus adult male testis cDNA, RIKEN full-length enriched library, clone:1700129L04 product:hypothetical protein, full insert sequence.	24.642	0.019			3.03165	0.167616		TCONS_00010574	XLOC_008155
AK007411	ncRNA								NM_001161768			561	0	2246	2807	1	0.2	0	1.783						1					8.396	0.015			-1.19847	0.0630398		TCONS_00010057	XLOC_007727
AK007475	ncRNA		NM_145953	-205								576	0	1302	1879	2	0.307	0	3.472					1	1					37.583	0.065			2.89932	0.0511307		TCONS_00018014	XLOC_013953
AK007501	ncRNA									AK151194	AK003900,AK049389,AK085526,BC022730,NM_001163741,NM_026782	369	0	0	369	0	1	0	0											189.541	0.514				0.0292267		TCONS_00012002	XLOC_009304
AK007504	ncRNA						AK009885,Guttman10_novel_lincs_TCONS_00002341,NR_033518,AK158918,AF374476,Guttman10_novel_lincs_TCONS_00002286,BC061003	AK158918				1521	0	0	1528	0	1	0	0			4								91.173	0.06	TRUE		-1.2604	0.00973042		TCONS_00022394	XLOC_017463
AK007507	ncRNA						AK020613.2	AK020613.2				746	0	0	747	0	1	0	0	1		2		1	1									-1.23453	0.00439672		TCONS_00027259	XLOC_021231
AK007529	ncRNA									NM_028211		558	0	0	558	0	1	0	0			2		2										-1.16206	0.00113526		TCONS_00021143	XLOC_016453
AK007545	ncRNA		BC096581	-95						BC120901		1174	0	477	1651	1	0.711	0	0.852			1		1		uc009nfh.1		AK007545	Mus musculus 10 day old male pancreas cDNA, RIKEN full-length enriched library, clone:1810019D21 product:unclassifiable, full insert sequence.	38.988	0.033	TRUE		-1.17794	0.0368798		TCONS_00026220	XLOC_020478
AK007554	ncRNA									BC013272		1472	0	11703	13177	1	0.112	0	0.679			1								109.821	0.075			2.16602	0.107781	-22.0957	TCONS_00024930	XLOC_019487
AK007576	ncRNA								BC023300			1080	0	0	1080	0	1	0	0					1	3					259.143	0.24			-0.965771	0.196395	-264.235	TCONS_00015947	XLOC_012329
AK007586	ncRNA		AK050539	-301								759	0	51481	52240	2	0.015	0	2.635			3		1	1	uc009ucq.1		2810403D21Rik	Mus musculus 10 day old male pancreas cDNA, RIKEN full-length enriched library, clone:1810022M18 product:unclassifiable, full insert sequence.	150.902	0.199	TRUE		-1.00415	0.00845491	-106.305	TCONS_00029123	XLOC_022759
AK007736	ncRNA									AK133293		1330	0	0	1330	0	1	0	0	1		3		1						1189.09	0.894			-1.21502	0.121248	-150.026	TCONS_00003347	XLOC_002702
AK007778	ncRNA	TRUE										536	0	255	791	1	0.678	0	1.866			1		1						164.08	0.306			-0.767018	0.0705193		TCONS_00011252	XLOC_008680
AK007799	ncRNA	TRUE										637	0	53083	53722	4	0.012	0	6.279			1		1	3					282.975	0.444	TRUE		-1.30111	0.0167637		TCONS_00009159	XLOC_007013
AK007818	ncRNA									NM_026925		277	0	137	414	1	0.669	0	3.61					1	1	uc008iar.1		AK007818	Mus musculus 10 day old male pancreas cDNA, RIKEN full-length enriched library, clone:1810018F18 product:unclassifiable, full insert sequence.	44.373	0.16			-1.24374	0.116537	-289.194	TCONS_00014344	XLOC_011096
AK007819	ncRNA		AK037010	-37								473	0	444	917	1	0.516	0	2.114			1		1		uc008jwi.1		AK007819	Mus musculus 10 day old male pancreas cDNA, RIKEN full-length enriched library, clone:1810047P18 product:hypothetical protein, full insert sequence.	55.559	0.117			0.392331	0.0667226		TCONS_00015259	XLOC_011791
AK007836	ncRNA		AK151411	-145								494	0	7056	7550	1	0.065	0	2.024			2		1		uc008mmm.1		AK007836	Mus musculus 10 day old male pancreas cDNA, RIKEN full-length enriched library, clone:1810049A24 product:unclassifiable, full insert sequence.	37.289	0.075			-0.877063	0.0424712		TCONS_00015753	XLOC_012169
AK007845	ncRNA	TRUE										453	0	160	613	1	0.739	0	2.208					1		uc009hgn.1		AK007845	Mus musculus 10 day old male pancreas cDNA, RIKEN full-length enriched library, clone:1810049I09 product:unclassifiable, full insert sequence.					-0.938839	0.205965		TCONS_00025244	XLOC_019699
AK007854	ncRNA	TRUE										1317	0	8157	9474	3	0.139	0	2.278					3	3	uc007zzm.1		AK007854	Mus musculus 10 day old male pancreas cDNA, RIKEN full-length enriched library, clone:1810053B23 product:unclassifiable, full insert sequence.	87.578	0.066			-1.13434	0.0744916		TCONS_00011752	XLOC_009115
AK007899	ncRNA		AK019076	-915					NM_029563			471	0	9157	9628	1	0.049	0	2.123					1	1	uc008vjp.1		AK007899	Mus musculus 10 day old male pancreas cDNA, RIKEN full-length enriched library, clone:1810058N05 product:unclassifiable, full insert sequence.	46.108	0.098			-0.96222	0.115641	-205.977	TCONS_00020376	XLOC_015833
AK007900	ncRNA		BC021411	-405							AF134804,AF134805,AK003801,AK028577,AK132478,AK132505,AK132506,AK144952,BC021411,NM_019935	628	0	0	628	0	1	0	0					1						64.155	0.102				0.0132653		TCONS_00013960	XLOC_010829
AK007903	ncRNA				AK036046	959						487	0	1934	2421	2	0.201	0	4.107					1	1					256.379	0.526			-1.15004	0.0256828		TCONS_00016180	XLOC_012505
AK007907	ncRNA	TRUE										690	0	417	1107	1	0.623	0	1.449			1		1	1	uc009aoy.1		AK007907	Mus musculus 10 day old male pancreas cDNA, RIKEN full-length enriched library, clone:1810059H22 product:unclassifiable, full insert sequence.	37.996	0.055	TRUE		-1.06789	0.0607832		TCONS_00022320	XLOC_017404
AK007908	ncRNA						NM_001081557,BC150740,AK144150,AK158710,AK034038,NM_001195565	BC150740				1261	0	0	1261	0	1	0	0			1								428.989	0.34			-1.23175	0.0334319	-128.499	TCONS_00020456	XLOC_015899
AK007947	ncRNA	TRUE										274	0	117	391	1	0.701	0	3.65					2	1	uc007jfe.1		AK007947	Mus musculus 10 day old male pancreas cDNA, RIKEN full-length enriched library, clone:1810063I02 product:unclassifiable, full insert sequence.					-1.09429	0.042246		TCONS_00003721	XLOC_003016
AK007969	ncRNA						BC090985,AK028105,NM_018874,AF061274,BC068266	AF061274				1718	0	0	1719	0	1	0	0			2								28.895	0.017				0.0567621	-61.7086	TCONS_00014346	XLOC_011097
AK007978	ncRNA	TRUE										1853	0	1817	3670	1	0.505	0	0.54			1		1						139.889	0.075			-1.19081	0.0861453		TCONS_00012252	XLOC_009523
AK007998	ncRNA		NM_001081168	-219						AK146084		714	0	5205	5919	3	0.121	0	4.202	1				1	1	uc007jad.1		AK007998	Mus musculus adult male small intestine cDNA, RIKEN full-length enriched library, clone:2010001A14 product:unclassifiable, full insert sequence.	72.473	0.102	TRUE		1.03467	0.0793297	-27.1342	TCONS_00004612	XLOC_003711
AK008014	ncRNA				BC038052	-48						596	0	439	1035	2	0.576	0	3.356					1		uc008zxj.2		2010001M06Rik	Mus musculus adult male small intestine cDNA, RIKEN full-length enriched library, clone:2010001M06 product:unclassifiable, full insert sequence.	255.989	0.43			1.03197	0.073176		TCONS_00022209	XLOC_017319
AK008015	ncRNA								NM_001040426			364	0	463	827	1	0.44	0	2.747			1		1	1					31.89	0.088			-0.760358	0.0896033	-29.3612	TCONS_00027579	XLOC_021496
AK008031	ncRNA		AK204973	107							AK098166,AK136556,AK147953,AK149886,AK149926,AK152921,AK155075,AK167767,AK178520,BC089015,BC089341,J02622,NM_010325,U82470	689	0	0	689	0	1	0	0											201.548	0.293			-1.1182	0.0363022		TCONS_00026185	XLOC_020453
AK008051	ncRNA		AK030083	-476							AF213258,AK030083,BC156417,NM_001159354,NM_133853	1199	0	0	1199	0	1	0	0			2		1	1					126.427	0.105			-0.984818	0.0181937	-212.007	TCONS_00017741	XLOC_013728
AK008061	ncRNA						AK003950,BC021501,BC030404,NM_026821	NM_026821				462	0	0	462	0	1	0	0			2								16.817	0.036			-0.961109	0.092127	-112.653	TCONS_00019217	XLOC_014841
AK008071	ncRNA						BC148440,AF142673,AB004786,NM_019835	NM_019835				1533	0	0	1533	0	1	0	0			2								160.372	0.105			-1.08386	0.0994102		TCONS_00017134	XLOC_013252
AK008102	ncRNA	TRUE							Belgard_TCONS_00311312			611	0	0	611	0	1	0	0					1						34.839	0.057	TRUE		-1.18114	0.0282136	-12.3514	TCONS_00024189	XLOC_018893
AK008103	ncRNA								AK142592			522	0	25681	26203	3	0.02	0	5.747			1		1	1					19.039	0.036			-0.854513	0.0542657		TCONS_00028022	XLOC_021869
AK008146	ncRNA	TRUE										1232	0	5476	6708	1	0.184	0	0.812			1		2	1					92.173	0.075			0.588488	0.161068	-50.9552	TCONS_00025846	XLOC_020182
AK008147	ncRNA	TRUE									Guttman10_novel_lincs_TCONS_00002965,Guttman10_novel_lincs_TCONS_00002966,NM_001195681	626	0	0	626	0	1	0	0					1	1					12.67	0.02			3.90175	0.00927122		TCONS_00027508	XLOC_021434
AK008218	ncRNA								AK044387	BC119069		816	0	5997	6813	2	0.12	0	2.451			2								133.911	0.164			-0.99213	0.132523	-31.1623	TCONS_00003788	XLOC_003071
AK008222	ncRNA	TRUE										747	0	5053	5800	1	0.129	0	1.339			1		1		uc009erj.1		AK008222	Mus musculus adult male small intestine cDNA, RIKEN full-length enriched library, clone:2010013B24 product:unclassifiable, full insert sequence.	70.989	0.095			-1.32915	0.0652341	-11.9955	TCONS_00023254	XLOC_018123
AK008245	ncRNA						BC050108,AK004553,BC033459	BC033459				753	0	0	753	0	1	0	0											13.383	0.018			-1.01014	0.011885		TCONS_00006356	XLOC_005020
AK008259	ncRNA		NM_173374	-109							AK018176,AK053674,AK078715,AK150535,AK169203,AK169623,BC046773,BC058627,NM_001078167,NM_173374,X66091	750	0	0	750	0	1	0	0			3		1	1					139.371	0.186			-1.08054	0.0927616		TCONS_00004888	XLOC_003935
AK008262	ncRNA		Belgard_TCONS_01579582	-490			AK145681,BC141035,NM_175389,BC090650,BC098478,AK089967,AK146481	AK089967	AK048857		AK089967,AK136278,AK145681,AK146481,BC090650,BC098478,BC141035,NM_001163457,NM_175389	294	0	0	294	0	1	0	0											8.528	0.029			-1.03378	0.0652034	-159.979	TCONS_00017905	XLOC_013864
AK008298	ncRNA	TRUE	AK155007	-451							AB076079,AK041621,AK077424,AK155007,BC099938	931	0	0	932	0	1	0	0			3		1	1					32.323	0.035			-1.02953	0.0297824	-255.047	TCONS_00014697	XLOC_011348
AK008306	ncRNA								AK043590	NM_001163754		388	0	1229	1617	1	0.24	0	2.577					1	1	uc011wya.1		AK008306	Mus musculus adult male small intestine cDNA, RIKEN full-length enriched library, clone:2010103J01 product:unclassifiable, full insert sequence.	68.722	0.177			-1.07248	0.0666155		TCONS_00000919	XLOC_000671
AK008316	ncRNA	TRUE										221	0	0	221	0	1	0	0											5.896	0.027			-1.10732	0.00126249		TCONS_00014085	XLOC_010887
AK008322	ncRNA		AK147168	-40					AJ242721		AK076180,AK147168,AK172991,BC021778,CT010295,NM_021419	302	0	0	302	0	1	0	0					1	1					23.67	0.078			-1.07615	0.0355596		TCONS_00012447	XLOC_009680
AK008330	ncRNA						NM_029494,BC017550,AK142206,AF399756,AB232626,AK017185	AK142206			AB232626,AF399756,AK017185	211	0	0	211	0	1	0	0											17.351	0.082			-1.26257	0.0140311		TCONS_00024592	XLOC_019219
AK008334	ncRNA											657	0	8013	8670	1	0.076	0	1.522	1		1		1	1	uc008fqc.1		AK008334	Mus musculus adult male small intestine cDNA, RIKEN full-length enriched library, clone:2010010A06 product:weakly similar to RECEPTOR TYROSINE KINASE EPHA1 [Mus musculus], full insert sequence.	14.115	0.021			0.562671	0.0879372		TCONS_00013824	XLOC_010739
AK008366	ncRNA						NM_172856,AK028849,BC057629,AK152417,AK151848,AK135798	AK135798				872	0	0	872	0	1	0	0			3								111.335	0.128			-1.38611	0.0167898		TCONS_00015282	XLOC_011812
AK008372	ncRNA	TRUE										392	0	0	392	0	1	0	0											56.848	0.145			-0.995586	0.0341285		TCONS_00023859	XLOC_018613
AK008378	ncRNA		NM_030563	-429							AK134934,AK147522,AK170714,AK172981,NM_030563	877	0	0	879	0	1	0	0			1								70.783	0.081			-0.184367	0.0107819		TCONS_00026123	XLOC_020406
AK008379	ncRNA	TRUE										514	0	3137	3651	1	0.141	0	1.946					1	1					263.395	0.512			-0.941	0.0573369	-222.66	TCONS_00018765	XLOC_014475
AK008384	ncRNA		AF347115	-260	BC094408	259						781	0	6096	6877	1	0.114	0	1.28			2				uc008elh.1		AK008384	Mus musculus adult male small intestine cDNA, RIKEN full-length enriched library, clone:2010110K18 product:unclassifiable, full insert sequence.	148.879	0.191			-0.792313	0.0223404	-47.5829	TCONS_00013082	XLOC_010155
AK008432	ncRNA	TRUE							AK205090.1			508	0	598	1106	1	0.459	0	1.969							uc007qsu.1		AK008432	Mus musculus adult male small intestine cDNA, RIKEN full-length enriched library, clone:2010203P06 product:unclassifiable, full insert sequence.	37.263	0.073			-1.2373	0.0101382		TCONS_00006973	XLOC_005439
AK008456	ncRNA									NM_199446		908	0	0	910	0	1	0	0			1		1						104.299	0.115			-1.26776	0.0275576		TCONS_00026120	XLOC_020403
AK008481	ncRNA								NM_007522	BC053692		533	0	690	1223	1	0.436	0	1.876						1					173.826	0.326			-1.18061	0.0964634	-74.9195	TCONS_00014449	XLOC_011147
AK008482	ncRNA											394	0	9484	9878	1	0.04	0	2.538							uc008qga.1		AK008482	Mus musculus adult male small intestine cDNA, RIKEN full-length enriched library, clone:2010013F14 product:RAR-related orphan receptor gamma, full insert sequence.	207.509	0.527			-0.926002	0.096104		TCONS_00018519	XLOC_014282
AK008488	ncRNA	TRUE										273	0	432	705	1	0.387	0	3.663							uc009njr.1		AK008488	Mus musculus adult male small intestine cDNA, RIKEN full-length enriched library, clone:2010001E04 product:unclassifiable, full insert sequence.	45.191	0.166			-1.14638	0.0044343		TCONS_00026261	XLOC_020508
AK008491	ncRNA								NM_001033186	AK037747		1004	0	375	1379	1	0.728	0	0.996	1						uc011ydj.1		AK008491	Mus musculus adult male small intestine cDNA, RIKEN full-length enriched library, clone:2010300F17 product:unclassifiable, full insert sequence.	384.427	0.383			-0.105363	0.0343466	-51.2936	TCONS_00004938	XLOC_003979
AK008570	ncRNA	TRUE										751	0	11114	11865	1	0.063	0	1.332					1						65.64	0.087			-1.08385	0.0448833	-31.9744	TCONS_00003694	XLOC_002990
AK008591	ncRNA							BC028286				648	0	1654	2302	3	0.281	0	4.63			1		2	2					17.976	0.028			-1.01311	0.10996	-5.3684	TCONS_00021637	XLOC_016866
AK008598	ncRNA	TRUE	NM_029357	-9								525	0	18849	19374	1	0.027	0	1.905			1		1	1					105.711	0.201			-1.2519	0.064651		TCONS_00013143	XLOC_010196
AK008665	ncRNA								BC042662			387	0	0	387	0	1	0	0							uc009fwe.1		AK008665	Mus musculus adult male stomach cDNA, RIKEN full-length enriched library, clone:2210008A02 product:phosphoglycerate mutase 1, full insert sequence.	56.667	0.146			-1.03539	0.0520661	-346.582	TCONS_00024983	XLOC_019534
AK008669	ncRNA		NM_172945	-175					AJ278769			1082	0	474	1556	1	0.695	0	0.924			2		1						436.425	0.403			-0.498611	0.0195838	-170.911	TCONS_00003850	XLOC_003124
AK008691	ncRNA									AF494380		465	0	0	465	0	1	0	0					1	1									-1.11403	0.0139938		TCONS_00011784	XLOC_009137
AK008705	ncRNA									AK040457		627	0	586	1213	2	0.517	0	3.19					1	2	uc009mlp.1		AK008705	Mus musculus adult male stomach cDNA, RIKEN full-length enriched library, clone:2210011C24 product:hypothetical protein, full insert sequence.	173.624	0.277	TRUE		1.57376	0.00664428		TCONS_00026997	XLOC_021021
AK008706	ncRNA						BC030411	BC030411				726	0	0	728	0	1	0	0			1		1	3					28.292	0.039				0.0237935		TCONS_00015380	XLOC_011889
AK008708	ncRNA	TRUE										1741	0	3044	4785	1	0.364	0	0.574			6		1						585.343	0.336			-1.00122	0.084968	9.2492	TCONS_00001528	XLOC_001181
AK008732	ncRNA							AK038594				1783	0	0	1787	0	1	0	0			2								106.938	0.06			2.46227	0.143055		TCONS_00025723	XLOC_020075
AK008733	ncRNA						AK030650	AK030650				1374	0	0	1374	0	1	0	0			4		1						157.411	0.115			-0.949183	0.116373	-97.01	TCONS_00017297	XLOC_013366
AK008743	ncRNA						AK135170,AK138313,AK158559,NM_181595,BC053748,AB091828,AK029737,AY308065	AK138313				1193	0	0	1203	0	1	0	0			3								61.686	0.052			-1.1524	0.045828		TCONS_00022371	XLOC_017442
AK008754	ncRNA	TRUE										1310	0	0	1310	0	1	0	0			1			1					358.845	0.274			-0.921135	0.195666	-56.4042	TCONS_00003736	XLOC_003028
AK008758	ncRNA								AK044585	AK147155		509	0	1043	1552	1	0.328	0	1.965			2								61.074	0.12			-0.990673	0.0285835		TCONS_00011444	XLOC_008851
AK008767	ncRNA	TRUE										518	0	1240	1758	1	0.295	0	1.931			1		1		uc007qct.1		AK008767	Mus musculus adult male stomach cDNA, RIKEN full-length enriched library, clone:2210022D18 product:unclassifiable, full insert sequence.	8.452	0.016			-1.12306	0.0801104	-72.9239	TCONS_00007681	XLOC_005905
AK008779	ncRNA						AK134782,BC094026,AK132340,NM_001033432	AK134782				897	0	0	899	0	1	0	0			2		1	1					87.326	0.097			-1.07427	0.0149489		TCONS_00002761	XLOC_002225
AK008781	ncRNA								NM_001113188	BC024335		1093	0	0	1095	0	1	0	0			3		2	1					75.573	0.069			-1.18226	0.0463113		TCONS_00018146	XLOC_014069
AK008796	ncRNA						U17698,AF420251,AK165924,AK151363,AK151026,AY033645,AK167328,AK167568,AK167744,AK153130,AK152184,AK152061,BC079642,AK034476,AK164040,BC004657,NM_145994,NM_007380,NM_001077193,NM_001077192,NM_001077190	NM_001077190				1958	0	0	1958	0	1	0	0			3								287.641	0.147				0.0172211		TCONS_00016219	XLOC_012535
AK008799	ncRNA										AK050463	493	0	0	494	0	1	0	0					1	1					1.523	0.003			-1.00539	0.0136373		TCONS_00004861	XLOC_003910
AK008823	ncRNA	TRUE										751	0	588	1339	1	0.561	0	1.332						1					26.935	0.036			-1.28657	0.0197391		TCONS_00017982	XLOC_013926
AK008826	ncRNA									NM_027913		502	0	181	683	1	0.735	0	1.992							uc008gqq.1		AK008826	Mus musculus adult male stomach cDNA, RIKEN full-length enriched library, clone:2210404E10 product:unclassifiable, full insert sequence.	71.641	0.143			0.189741	0.053796	-11.788	TCONS_00014040	XLOC_010855
AK008836	ncRNA								AJ278576	AK040569		1094	0	0	1094	0	1	0	0					1						30.526	0.028				0.0367622		TCONS_00025534	XLOC_019928
AK008838	ncRNA		AK139561	-184						NM_001113364		941	0	8103	9045	1	0.104	0	1.063					1						42.21	0.045			3.57431	0.0436863		TCONS_00021609	XLOC_016842
AK008862	ncRNA	TRUE							AK018251			1852	0	1959	3811	1	0.486	0	0.54	1		1		1										1.36356	0.190734		TCONS_00002130	XLOC_001685
AK008866	ncRNA						AY249865,BC113169,BC113167,NM_133891,BC025941,BC010258	NM_133891				2061	0	0	2061	0	1	0	0			3		1	1	uc008sxb.1		AK008866	Mus musculus adult male stomach cDNA, RIKEN full-length enriched library, clone:2210409B22 product:unclassifiable, full insert sequence.	1759.25	0.854				0.0639031		TCONS_00019134	XLOC_014776
AK008877	ncRNA									U13174		1044	0	0	1050	0	1	0	0			3		2	1					35.646	0.034			-1.10112	0.0152633		TCONS_00013247	XLOC_010281
AK008884	ncRNA									NM_052993		1407	0	0	1411	0	1	0	0			3		1	2					430.206	0.306			-1.29488	0.0138306		TCONS_00022389	XLOC_017458
AK008898	ncRNA									U13174		2190	0	0	2190	0	1	0	0	1		3		1	1					171.616	0.078			-1.18805	0.028564		TCONS_00013246	XLOC_010280
AK008903	ncRNA								M31441			640	0	5443	6083	2	0.105	0	3.125					1	3					153.344	0.24			-1.03024	0.100502	-29.1607	TCONS_00001896	XLOC_001492
AK008905	ncRNA						NM_013837,AF038008,BC012666,NM_001130476,AK150753,CT010202	AF038008				498	0	0	498	0	1	0	0					1	3					41.041	0.082				0.0296582	20.3338	TCONS_00021271	XLOC_016558
AK008908	ncRNA		AK211480	136	NM_001164518	893				BC112410		956	0	0	956	0	1	0	0	1		1		1						59.178	0.062			-1.08417	0.0570908	-16.5305	TCONS_00024325	XLOC_019003
AK008923	ncRNA	TRUE										394	0	125	519	1	0.759	0	2.538											5.897	0.015			-0.935321	0.112988	-21.4103	TCONS_00027658	XLOC_021565
AK008951	ncRNA		AK138779	124							AK077026,AK138779,AK166114,BC103685,BC104737,BC105676,NM_001033289	879	0	0	879	0	1	0	0					1	1					118.502	0.135			-1.16691	0.0865905	-45.5034	TCONS_00001201	XLOC_000897
AK008954	ncRNA						AF536978,NM_011056,BC132109,BC132107,AK081013,AF038896,EU489880	NM_011056				2238	0	0	2238	0	1	0	0	1		8								81.634	0.036			-1.16488	0.0681439	-38.8466	TCONS_00007401	XLOC_005690
AK008969	ncRNA		AK167468	-78					NM_010438			522	0	9074	9596	1	0.054	0	1.916					1	1	uc007fhb.1		AK008969	Mus musculus adult male stomach cDNA, RIKEN full-length enriched library, clone:2210417K05 product:unclassifiable, full insert sequence.	142.443	0.273			-0.966156	0.129281		TCONS_00002261	XLOC_001802
AK008975	ncRNA						BC115486,BC115485,AK038184,BC094395,AK008225,AK050740,NM_175152,NM_001145929,BC059091	BC059091				451	0	0	451	0	1	0	0											10.746	0.024			-0.999108	0.0215118		TCONS_00020460	XLOC_015903
AK009029	ncRNA						AK035719,AK042893,AK028964,BC053387,AF000582,U39060,NM_008678,NM_001077695	BC053387				1330	0	0	1330	0	1	0	0			1								69.135	0.052			-1.30142	0.0160848		TCONS_00001045	XLOC_000760
AK009054	ncRNA						AK049848,X79083,NM_001122889,AK033903,AK030480,X79082,NM_010141,BC026153,X79084,X81466	AK033903				2070	0	0	2070	0	1	0	0	2		4			1					64.31	0.031			-1.36722	0.0500348	-78.1834	TCONS_00019001	XLOC_014662
AK009067	ncRNA								BC072564			532	0	7067	7599	1	0.07	0	1.88			2				uc009hev.1		AK009067	Mus musculus 18-day embryo whole body cDNA, RIKEN full-length enriched library, clone:1110014K08 product:unclassifiable, full insert sequence.	18.752	0.035			-0.603438	0.153145		TCONS_00024396	XLOC_019062
AK009069	ncRNA						NM_001199224,FN429927,AK052433,DQ867033	FN429927				951	0	0	951	0	1	0	0			3		1						108.724	0.114			-1.20916	0.0835528	-72.7853	TCONS_00024468	XLOC_019123
AK009091	ncRNA	TRUE										993	0	7917	8910	2	0.111	0	2.014					1	1					73.745	0.074			-1.10327	0.0540917		TCONS_00025050	XLOC_019593
AK009126	ncRNA	TRUE										458	0	202	660	1	0.694	0	2.183			1		1	1					24.544	0.054			-1.02622	0.00679613		TCONS_00028278	XLOC_022074
AK009163	ncRNA									NM_008712		1359	0	0	1360	0	1	0	0					1	1					234.859	0.173			-0.904367	0.11011	7.9763	TCONS_00021173	XLOC_016478
AK009168	ncRNA	TRUE							AK135687			1187	0	9770	10957	2	0.108	0	1.685	1				1	1					176.63	0.149			-0.631274	0.111377	-206.935	TCONS_00008155	XLOC_006184
AK009175	ncRNA				NM_027925	740				AK132927		933	0	1412	2345	3	0.398	0	3.215			1		1		uc008vaz.1		Snhg12	Mus musculus adult male tongue cDNA, RIKEN full-length enriched library, clone:2310005L22 product:unclassifiable, full insert sequence.	107.469	0.115	TRUE		2.04837	0.0876905		TCONS_00019553	XLOC_015121
AK009208	ncRNA									AK049990		1537	0	0	1541	0	1	0	0	1		1			1					52.774	0.034			-1.18961	0.0402232		TCONS_00015936	XLOC_012319
AK009214	ncRNA											509	0	29561	30070	3	0.017	0	5.894					1	1	uc007ago.2		2610203C22Rik	Mus musculus adult male tongue cDNA, RIKEN full-length enriched library, clone:2310007M24 product:unclassifiable, full insert sequence.	144.422	0.284			-1.12473	0.065503		TCONS_00001022	XLOC_000748
AK009219	ncRNA						AK011953,AK011152,AK077323,AK139488,AF253516,AK169413,AK010376,BC057570,BC050884,NR_024487.1,NM_018888	NM_018888				1474	0	0	1474	0	1	0	0	2		1								91.304	0.062			-0.0360352	0.0368022		TCONS_00017027	XLOC_013184
AK009242	ncRNA	TRUE										566	0	9263	9829	2	0.058	0	3.534											57.104	0.101				0.0435175		TCONS_00026680	XLOC_020735
AK009271	ncRNA									AK086009		1035	0	1395	2430	1	0.426	0	0.966						1					61.415	0.059	TRUE		-1.39398	0.00743082		TCONS_00029388	XLOC_022972
AK009289	ncRNA	TRUE										316	0	0	316	0	1	0	0					1						47.748	0.151			-1.13161	0.0492814		TCONS_00002468	XLOC_001981
AK009290	ncRNA		BC138708	-593	Belgard_TCONS_01771198	368						781	0	2919	3702	1	0.212	0	1.28					1	1					175.299	0.224			-0.793138	0.0868399		TCONS_00012500	XLOC_009718
AK009335	ncRNA		L13853	489								1563	0	12959	14522	3	0.108	0	1.919			5		1		uc009jgw.1		AK009335	Mus musculus adult male tongue cDNA, RIKEN full-length enriched library, clone:2310014F06 product:unclassifiable, full insert sequence.	76.619	0.049			-1.09007	0.0529752		TCONS_00025497	XLOC_019898
AK009348	ncRNA	TRUE										574	0	11472	12046	3	0.048	0	5.226			1		1	1	uc007oam.1		2310015A10Rik	Mus musculus adult male tongue cDNA, RIKEN full-length enriched library, clone:2310015A10 product:unclassifiable, full insert sequence.	128.983	0.225	TRUE		-1.00265	0.0417722	-31.9529	TCONS_00006309	XLOC_004981
AK009349	ncRNA	TRUE										773	0	378	1151	1	0.672	0	1.294											35.008	0.045			-1.04258	0.0416513		TCONS_00012467	XLOC_009697
AK009366	ncRNA	TRUE										1460	0	2288	3749	1	0.39	0	0.685			1		1						104.959	0.072			1.76894	0.0686033		TCONS_00000339	XLOC_000288
AK009383	ncRNA									NM_007642		383	0	24560	24943	3	0.015	0	7.833					1	1	uc007bey.1		AK009383	Mus musculus adult male tongue cDNA, RIKEN full-length enriched library, clone:2310016D23 product:unclassifiable, full insert sequence.	29.612	0.077				0.0294402		TCONS_00000244	XLOC_000205
AK009407	ncRNA									AK137940		918	0	1245	2163	2	0.424	0	2.179			1								248.051	0.27			-0.901353	0.147406	23.2996	TCONS_00010016	XLOC_007695
AK009443	ncRNA				AK136327	-537			AK019725	AK178767		1986	0	0	1986	0	1	0	0			3								197.125	0.099				0.0185657	-126.196	TCONS_00026669	XLOC_020727
AK009452	ncRNA	TRUE										668	0	0	668	0	1	0	0			2								11.286	0.017			-1.1489	0.0355437	-241.994	TCONS_00016978	XLOC_013145
AK009453	ncRNA							NM_009100	Guttman11_TCONS_00000961		BC169290,BC169291	1199	0	0	1199	0	1	0	0			6								60.129	0.05				0.0299795	-331.962	TCONS_00017662	XLOC_013661
AK009488	ncRNA		DQ066415	-53	AK041122	-196						940	0	25368	26308	3	0.036	0	3.191			1		1						324.037	0.345			-0.740596	0.0346758		TCONS_00004696	XLOC_003773
AK009503	ncRNA		AK206626	123							AK144495,AK153333,BC003487,BC049778,BC052845,BC057209,NM_001199023,NM_001199024,NM_001199025,NM_016915	1088	0	0	1088	0	1	0	0					1	1					157.441	0.145			-1.0958	0.0824939	-118.052	TCONS_00009885	XLOC_007587
AK009506	ncRNA		BC070420	74								1302	0	22097	23408	2	0.056	0	1.536			1		2	3					105.102	0.081			-1.11768	0.116441		TCONS_00013554	XLOC_010530
AK009512	ncRNA									NM_172703		400	0	76	476	1	0.84	0	2.5					1	1					43.127	0.108			-1.05377	0.058773	-47.2703	TCONS_00019601	XLOC_015161
AK009532	ncRNA						AJ240086,NM_026275,AK075714,BC011112,AK075703,AK003550,AK007517	AK007517				2180	0	0	2180	0	1	0	0			2								191.049	0.088			-1.13552	0.132193		TCONS_00019060	XLOC_014712
AK009549	ncRNA				AK185444	-254						1006	0	5897	6904	1	0.146	0	0.994			2		1	1					601.176	0.598			-1.136	0.149274		TCONS_00004499	XLOC_003649
AK009626	ncRNA		NM_030705	-569							AK036338,AK084510,AK089082,AK162446,AY007813,BC018326,NM_030705	283	0	0	283	0	1	0	0					1	1					7.612	0.027			-1.32989	0.0119534		TCONS_00024523	XLOC_019158
AK009641	ncRNA	TRUE									BC051628,NM_199312	330	0	0	330	0	1	0	0					1	1					24.357	0.074			-0.566883	0.0273799		TCONS_00016059	XLOC_012405
AK009643	ncRNA						NM_011050,AK134366,BC038304,D86344,AK172654,NM_001168491,BC055739,NM_001168492	AK134366				970	0	0	970	0	1	0	0			5								34.617	0.036			-1.24331	0.0123041		TCONS_00014287	XLOC_011048
AK009658	ncRNA								AK089459	NM_001164734		482	0	0	482	0	1	0	0											58.422	0.121			-1.15765	0.0180095		TCONS_00022737	XLOC_017722
AK009685	ncRNA						AK129026,AF184981,NM_018881,BC031415	AK129026				302	0	0	306	0	1	0	0											15.003	0.05			-1.45068	0.071247		TCONS_00001752	XLOC_001373
AK009692	ncRNA						AF338472,BC167211,AF496547,NM_080448,AK122276	NM_080448				395	0	0	395	0	1	0	0											49.545	0.125			-1.15651	0.0134599		TCONS_00023903	XLOC_018647
AK009713	ncRNA		AK008742	-159	BC023948	205				AK155810	AF129086,AK002752,AK004464,AK008742,AK045776,AK158595,AK166630,AK183561,AK209265,BC020110,BC027427,BC038939,NM_019719	1145	0	0	1147	0	1	0	0					1						33.808	0.03			-0.840788	0.0905761	-103.568	TCONS_00011969	XLOC_009279
AK009740	ncRNA		NM_026636	-79							AK034939,AK043798,AK077402,AK084049,AK147083,AK195877,BC005692,BC026453,NM_026636,NM_181418	615	0	0	615	0	1	0	0					1	1					91.619	0.149			-1.19081	0.150012		TCONS_00026940	XLOC_020971
AK009774	ncRNA								NM_009376			2016	0	2076	4092	1	0.493	0	0.496	1		4		1						129.558	0.064				0.203935		TCONS_00009127	XLOC_006993
AK009785	ncRNA								NM_027293			1553	0	1186	2739	1	0.567	0	0.644			1		1	1	uc007zzy.1		AK009785	Mus musculus adult male tongue cDNA, RIKEN full-length enriched library, clone:2310043M15 product:unclassifiable, full insert sequence.	206.678	0.133			-0.845915	0.100841	11.1373	TCONS_00011761	XLOC_009119
AK009804	ncRNA								AK220455	AK052238		618	0	771	1389	1	0.445	0	1.618											122.655	0.198			-1.0051	0.0770646	-112.677	TCONS_00024522	XLOC_019157
AK009831	ncRNA						NM_001166030	NM_001166030				1121	0	0	1122	0	1	0	0	1		6								75.227	0.067			-1.1709	0.0125378		TCONS_00007650	XLOC_005884
AK009869	ncRNA								AK155259	AK168702		524	0	106	630	1	0.832	0	1.908					1		uc009apo.1		AK009869	Mus musculus adult male tongue cDNA, RIKEN full-length enriched library, clone:2310047D07 product:unclassifiable, full insert sequence.	28.839	0.055			2.83799	0.303781	-340.218	TCONS_00021393	XLOC_016660
AK009897	ncRNA				AK009352	755				BC137680		1268	0	2481	3749	1	0.338	0	0.789			2		1		uc007ggl.1		2310050B05Rik	Mus musculus adult male tongue cDNA, RIKEN full-length enriched library, clone:2310050B05 product:unclassifiable, full insert sequence.	132.479	0.104			-1.12251	0.0455947		TCONS_00002376	XLOC_001902
AK009920	ncRNA						NM_010678,BC052061,AK046648,U34361	NM_010678				2092	0	0	2093	0	1	0	0			7								261.815	0.125			-1.13027	0.052711		TCONS_00001186	XLOC_000883
AK009949	ncRNA		AK009557	-118			BC160303,BC160302	BC160303			AB021860,AK009557,AK029222,BC082609,NM_013924	1264	0	0	1267	0	1	0	0					2	1					49.763	0.039			-0.179062	0.0214054	72.8989	TCONS_00006777	XLOC_005282
AK009974	ncRNA		DQ066415	-345	BC150739	-300						883	0	12203	13086	1	0.067	0	1.133					1	1					293.868	0.333				0.343638	-198.493	TCONS_00004697	XLOC_003773
AK009978	ncRNA						AK153986,AK088648,BC100759,AY312280,NM_172493,AK083254	NM_172493				1069	0	0	1069	0	1	0	0			5		1						17.857	0.017			-1.24823	0.0246275		TCONS_00029167	XLOC_022786
AK009987	ncRNA						AK044360	AK044360		BC059230		1566	0	0	1566	0	1	0	0	2		4		1						138.687	0.089			-0.934692	0.0135756		TCONS_00005977	XLOC_004707
AK009989	ncRNA				AK035152	-813	NM_173379,AJ430350	AJ430350				1686	0	0	1692	0	1	0	0			7								30.187	0.018			-1.19274	0.0101448		TCONS_00011391	XLOC_008806
AK009996	ncRNA								AK032913			380	0	0	380	0	1	0	0					1	1					19.329	0.051			-1.16367	0.0205642		TCONS_00006302	XLOC_004975
AK009999	ncRNA						AK137718,AK141765	AK141765				1419	0	0	1419	0	1	0	0			1								289.798	0.204			-0.606654	0.0859254	-11.3823	TCONS_00015943	XLOC_012325
AK010009	ncRNA		NM_001013771	372							BC072561,NM_001013771	839	0	0	840	0	1	0	0					1	1					396.247	0.472			-0.870262	0.0591565	-205.199	TCONS_00001274	XLOC_000960
AK010059	ncRNA									NM_027163		487	0	0	487	0	1	0	0			1		1	1					48.241	0.099			-0.873446	0.0788835		TCONS_00015000	XLOC_011583
AK010066	ncRNA						AK135463,AK004751,BC012211,NM_016862,BC089321,AK148281,AK028646,AF035823,AF035209,BC019386	BC019386				1302	0	0	1302	0	1	0	0			2								488.029	0.375				0.00462257		TCONS_00014303	XLOC_011060
AK010080	ncRNA	TRUE										745	0	0	745	0	1	0	0					1	2					52.144	0.07			-1.04763	0.0230116	-27.9037	TCONS_00011118	XLOC_008597
AK010100	ncRNA	TRUE										1032	0	127859	128891	3	0.008	0	2.907			3			1					193.727	0.188			-1.22317	0.149996		TCONS_00007231	XLOC_005550
AK010104	ncRNA						AF067395,AK013467,BC085237,BC049081,AK007920,AK139950,AK018668,AK155040,AK169391,AK168482,NM_009761,AY057069,AK004667	AK004667				1233	0	0	1235	0	1	0	0			1		1	2					117.872	0.096			-1.28156	0.0192559		TCONS_00009213	XLOC_007053
AK010109	ncRNA				AK046721	201	BC080862,AK165197,AF453257,BC052435,NM_080440,NM_001167920,AK139260,AK044636	AK139260				1572	0	38	1612	1	0.976	0	0.636	1		2								285.044	0.181			-0.905863	0.0357507		TCONS_00006323	XLOC_004993
AK010122	ncRNA	TRUE										1855	0	2133	3988	3	0.465	0	1.617	2		4		1		uc009clm.1		AK010122	Mus musculus adult male tongue cDNA, RIKEN full-length enriched library, clone:2310069B03 product:inferred: RIKEN cDNA 2310069B03 gene, full insert sequence.	179.395	0.097			-1.23871	0.0339884		TCONS_00023661	XLOC_018454
AK010155	ncRNA		NM_022418	-66					AK134078		AB030183,AK008109,AY603379,BC019547,NM_022418	572	0	0	572	0	1	0	0			1		1	1					35.302	0.062			-0.915283	0.187328	-114.663	TCONS_00020629	XLOC_016035
AK010164	ncRNA								NM_001177616			427	0	338	765	1	0.558	0	2.342			1								8.728	0.02			0.403513	0.0340224		TCONS_00027917	XLOC_021786
AK010182	ncRNA		AK163787	-124							AB007631,AK053816,AK076257,AK133875,AK141851,AK161528,AK163787,AK170570,BC012869,BC050830,NM_011156	667	0	0	667	0	1	0	0			1			1					70.642	0.106			-1.14588	0.00849816		TCONS_00002938	XLOC_002366
AK010184	ncRNA						BC023907,BC032159,BC016096,NM_028903,AK133176,DQ122126,BC026758	AK133176				1166	0	0	1166	0	1	0	0			2								56.732	0.049			-1.14183	0.101261	-42.3798	TCONS_00008627	XLOC_006585
AK010197	ncRNA									BC119129		597	0	0	597	0	1	0	0			2		1	1					438.838	0.735			-1.15338	0.00508121		TCONS_00028512	XLOC_022273
AK010233	ncRNA									BC147458		1695	0	0	1695	0	1	0	0			6			1					449.699	0.265			-0.879298	0.0330381		TCONS_00000134	XLOC_000120
AK010245	ncRNA	TRUE										759	0	3146	3905	1	0.194	0	1.318			3			2	uc008sxm.1		AK010245	Mus musculus adult male tongue cDNA, RIKEN full-length enriched library, clone:2310081O03 product:unclassifiable, full insert sequence.	20.093	0.026			-0.530162	0.145683		TCONS_00019948	XLOC_015462
AK010580	ncRNA	TRUE										1982	0	1087	3069	1	0.646	0	0.505			4		1						125.521	0.063			-0.578852	0.0945916		TCONS_00023805	XLOC_018562
AK010638	ncRNA											1181	0	20189	21370	3	0.055	0	2.54			1				uc009sno.1		AK010638	Mus musculus ES cells cDNA, RIKEN full-length enriched library, clone:2410038P04 product:suppressor of variegation 3-9 homolog 1 (Drosophila), full insert sequence.	603.754	0.511			-0.747468	0.0485986		TCONS_00028843	XLOC_022536
AK010645	ncRNA						AK141250	AK141250				928	0	432	1360	1	0.682	0	1.078			2		1						8.509	0.009			0.791416	0.0203898		TCONS_00024178	XLOC_018882
AK010740	ncRNA	TRUE										628	0	5464	6092	1	0.103	0	1.592					1						7.691	0.012			1.6533	0.0241181		TCONS_00001829	XLOC_001434
AK010742	ncRNA								NM_001252585			1152	0	0	1164	0	1	0	0			1								65.257	0.057			-1.35759	0.0383177		TCONS_00015945	XLOC_012327
AK010767	ncRNA	TRUE										1012	0	742	1754	2	0.577	0	1.976					1		uc008sgr.1		AK010767	Mus musculus ES cells cDNA, RIKEN full-length enriched library, clone:2410114N07 product:unclassifiable, full insert sequence.	61.512	0.061			-0.438904	0.0845741		TCONS_00019841	XLOC_015369
AK010793	ncRNA				AK037537	410				BC033438		875	0	421	1296	1	0.675	0	1.143					1	3	uc009pub.1		AK010793	Mus musculus ES cells cDNA, RIKEN full-length enriched library, clone:2410133F24 product:unclassifiable, full insert sequence.	333.387	0.381				0.0631707	-31.081	TCONS_00028324	XLOC_022112
AK010802	ncRNA								BC042424		AK042792,AK048092,AK053104,AK081769,AK144103,AK144890,AK173023,BC020180,NM_144787	1707	0	0	1715	0	1	0	0			1								328.547	0.192			-1.19368	0.234759	145.11	TCONS_00020021	XLOC_015526
AK010814	ncRNA	TRUE										871	0	56007	56878	1	0.015	0	1.148			1								51.334	0.059			-0.992864	0.0265975	8.9133	TCONS_00014448	XLOC_011146
AK010824	ncRNA				AK013593	-356						608	0	4880	5488	1	0.111	0	1.645			1		1	1	uc008kcf.1		AK010824	Mus musculus ES cells cDNA, RIKEN full-length enriched library, clone:2410164B09 product:unclassifiable, full insert sequence.	30.575	0.05			-0.868931	0.133064		TCONS_00016551	XLOC_012800
AK010838	ncRNA		AK014304	-82						BC158015	AK014304,BC085113,NM_001008498	417	0	0	417	0	1	0	0			1		1	3					38.913	0.093			0.12648	0.131229	-143.152	TCONS_00015056	XLOC_011626
AK010894	ncRNA		NM_001122959	-159						NM_153521		538	0	14454	14992	2	0.036	0	3.717					3	5	uc008ugf.1		AK010894	Mus musculus 13 days embryo liver cDNA, RIKEN full-length enriched library, clone:2510003B16 product:unclassifiable, full insert sequence.	167.502	0.311			-0.617328	0.190927	32.6618	TCONS_00019433	XLOC_015020
AK010955	ncRNA		AK046651	-58			M81483,BC066000,BC037668,NM_008914,AB221678,AK135203	AB221678			AK007938	858	0	0	858	0	1	0	0			3		1						256.593	0.299			-1.37997	0.082972		TCONS_00008906	XLOC_006810
AK010973	ncRNA						AK129303,AK137626,AF217002,AK148129,NM_145853,BC058951,AK077411	AK129303				984	0	0	985	0	1	0	0											19.608	0.02			-0.895474	0.0662928		TCONS_00022083	XLOC_017215
AK010974	ncRNA	TRUE	AK140426	-92							AK140426,AK163589	1658	0	0	1658	0	1	0	0			3		1						193.612	0.117			-1.33314	0.0869983	-28.94	TCONS_00025632	XLOC_020008
AK010976	ncRNA								NM_172991	AK007150		1259	0	0	1259	0	1	0	0			1		1						167.561	0.133			-1.07747	0.0375601		TCONS_00020512	XLOC_015941
AK010982	ncRNA						AK156743,AK003127,AJ271476,AK013793,AK019381,NM_021534,AK050647,BC025796,AK143785	AK156743				1336	0	0	1347	0	1	0	0			10		1	1					64.853	0.049			-0.342517	0.0232137		TCONS_00017017	XLOC_013175
AK010986	ncRNA						AK156743,AK003127,AJ271476,AK013793,AK019381,NM_021534,AK050647,BC025796,AK143785	AK156743				1331	0	0	1346	0	1	0	0			10		1	1					64.849	0.049			-0.139243	0.0334892		TCONS_00017016	XLOC_013175
AK011091	ncRNA						DQ533875,NM_175549,DQ533876,AK085461,AK035110,AK031495	DQ533875				768	0	0	768	0	1	0	0			3			1					144.451	0.188			-0.977572	0.0163863		TCONS_00011636	XLOC_009017
AK011095	ncRNA						NM_001033259,AK144727	NM_001033259	AK189445			879	0	0	879	0	1	0	0											86.968	0.099			-1.1954	0.0344405		TCONS_00002989	XLOC_002413
AK011139	ncRNA				BC005458	334				NM_016918		1705	0	0	1705	0	1	0	0			2		1	1					115.742	0.068			-0.383513	0.0502751		TCONS_00014881	XLOC_011493
AK011142	ncRNA						BC137853,BC132449,AB030244,NM_080855	NM_080855	BC030491			1346	0	0	1346	0	1	0	0	1										74.99	0.056				0.0854203		TCONS_00027212	XLOC_021189
AK011214	ncRNA	TRUE							AK018581			772	0	0	772	0	1	0	0					1						15.697	0.02			-0.959228	0.0327442		TCONS_00012961	XLOC_010059
AK011222	ncRNA		NM_001159497	499					Belgard_TCONS_01782050			426	0	1844	2270	1	0.188	0	2.347			1								49.854	0.117				0.0116151		TCONS_00012789	XLOC_009952
AK011250	ncRNA						AK146680,AB221660,AK140748,AK134321,AK168684,U33630,U33629,NM_010789,NM_001193271,BC023689,AK132298,AK049720	NM_001193271				867	0	0	867	0	1	0	0			1								390.769	0.451			-1.24076	0.00834992		TCONS_00004331	XLOC_003507
AK011267	ncRNA						U56920,U64828,NM_010881,AK089302	NM_010881			BC068177,U64606	813	0	0	814	0	1	0	0			2								83.778	0.103			-1.24141	0.0315327		TCONS_00006008	XLOC_004734
AK011292	ncRNA				NM_025727	100				AK149660		1048	0	0	1048	0	1	0	0			5		1						303.454	0.29			-1.28339	0.0261472		TCONS_00004959	XLOC_003999
AK011318	ncRNA		AK160719	-274							AK160719,BC086669,NM_001013761	679	0	0	679	0	1	0	0											508.607	0.749			-1.15255	0.0288833	-380.224	TCONS_00010848	XLOC_008360
AK011331	ncRNA						BC166029,NM_008032,AJ001549	AJ001549				1965	0	0	1965	0	1	0	0			4								84.107	0.043			-1.17647	0.0475071	-81.3792	TCONS_00028983	XLOC_022645
AK011339	ncRNA						AK167864,AK166778,AK161624,NM_019642,AK004968,BC046806,AK018761,AK153952,BC010509,D31717	AK018761				654	0	0	654	0	1	0	0			1								26.605	0.041			-0.901194	0.0585284		TCONS_00015900	XLOC_012287
AK011347	ncRNA		NM_172688	-294							AK046565,AK053911,AK137046,AK145302,AK159277,BC006665,D76446,NM_009316,NM_172688	1243	0	0	1244	0	1	0	0			5								65.05	0.052			-1.24705	0.0445441	-15.5245	TCONS_00019825	XLOC_015356
AK011370	ncRNA		AK089938	-92						AK132537	AK089938,AK144836,AK157832,BC004088,BC015287,NM_030566	550	0	0	550	0	1	0	0											71.201	0.129			-1.26929	0.0170646		TCONS_00025573	XLOC_019957
AK011375	ncRNA						BC096021,NM_177047,AK147478,BC151031,AK052418,BC151047	AK147478				2233	0	0	2235	0	1	0	0	1										383.386	0.172			-1.03423	0.0162245		TCONS_00022179	XLOC_017292
AK011377	ncRNA						BC120893,NM_001081037,BC120892,NM_001242411,AK138257	NM_001242411				1488	0	0	1488	0	1	0	0			2								155.487	0.104			-1.18724	0.155449	-18.5456	TCONS_00003386	XLOC_002735
AK011385	ncRNA						NM_173437,AK122458,BC059840,AK053255,AK082667,AF307453,AK140435	NM_173437				1023	0	0	1023	0	1	0	0			1								48.685	0.048			-1.00711	0.0391497		TCONS_00001610	XLOC_001252
AK011411	ncRNA						NM_133501,NM_133500,AF475080,AF475079,AB052338,AB052337,AB052336,BC145600,BC141258	BC141258				1543	0	0	1543	0	1	0	0	1		2		1	1					231.602	0.15			-0.242262	0.106094		TCONS_00016268	XLOC_012569
AK011482	ncRNA						AK171632,AK139388,NM_172752,BC172140,BC151038,NM_001205219	NM_001205219				1287	0	19831	21118	2	0.061	0	1.554			2		1	1	uc009lpe.1		AK011482	Mus musculus adult male small intestine cDNA, RIKEN full-length enriched library, clone:2010203O03 product:unclassifiable, full insert sequence.	116.397	0.09			-1.05217	0.10343		TCONS_00025912	XLOC_020237
AK011483	ncRNA								DQ480427	AK160292		588	0	268	856	1	0.687	0	1.701			2		2	2					56.421	0.096				0.0128295		TCONS_00011372	XLOC_008788
AK011494	ncRNA						BC064792,AK168503,AK169805,AK003098,AK168276,AK151726,AK153564,AK169232,AK159470,AK168758,AK151087,AK169122,AK168820,AK051543,AK166281,AK154870,AK167609,AK144216,AK168089,AK168013,AK167195,U37720,AK075567,AK167400,AK168076,NM_009861,AK145659,NM_001243769,AK150563	AK145659				1734	0	0	1734	0	1	0	0	1		4								554.433	0.32			-0.221809	0.0697257		TCONS_00020374	XLOC_015831
AK011527	ncRNA						AK020915,BC026695,AK167525,NM_023324,AK151660,AK152900,AK045673,AK152997,AK153372,AK029586	AK020915				1747	0	0	1748	0	1	0	0	1		8								323.379	0.185			-0.22828	0.0696544		TCONS_00003511	XLOC_002836
AK011537	ncRNA						AF472514,AK038671,AK029694,BC080732,NM_145711,AK161578,AK133397,AK051947,AK161718	AK133397				406	0	0	406	0	1	0	0											7.551	0.019			-1.30639	0.0126032		TCONS_00019745	XLOC_015290
AK011538	ncRNA	TRUE	AK148007	-139							AK031018,AK047223,AK088417,AK132774,AK143457,AK148007,AK165068,AK168833,AK171256,BC027307,BC029016,NM_153516	678	0	0	678	0	1	0	0			1			2					43.537	0.064			-0.354906	0.0486628		TCONS_00023980	XLOC_018713
AK011565	ncRNA									NM_010133		1133	0	67531	68664	6	0.017	0	5.296					1						117.789	0.104			-0.709407	0.201127		TCONS_00000487	XLOC_000417
AK011567	ncRNA		AK042183	-509			NM_001081336	NM_001081336				462	0	0	462	0	1	0	0			1								23.314	0.05			-1.10688	0.0308386		TCONS_00009315	XLOC_007141
AK011568	ncRNA		NM_009324	-391								879	0	35556	36435	3	0.024	0	3.413			1		1		uc007kry.1		AK011568	Mus musculus 10 days embryo whole body cDNA, RIKEN full-length enriched library, clone:2610027K06 product:unclassifiable, full insert sequence.	235.926	0.268			-0.95501	0.263491	79.9572	TCONS_00004850	XLOC_003900
AK011582	ncRNA						AK220365,BC076567,NM_001081373,AK032890.1	NM_001081373				1713	0	0	1713	0	1	0	0			2								273.047	0.159			-1.31691	0.0706333		TCONS_00028247	XLOC_022051
AK011585	ncRNA	TRUE										867	0	25890	26757	4	0.032	0	4.614					1						47.021	0.054			-1.02768	0.100157		TCONS_00020280	XLOC_015751
AK011587	ncRNA		BC052844	32							AK049891,AK052457,AK087485,BC052844,BC152876,BC156617,NM_172815	1096	0	0	1096	0	1	0	0											266.27	0.243			-1.0859	0.125196	-46.1817	TCONS_00009733	XLOC_007483
AK011598	ncRNA	TRUE										2151	0	0	2151	0	1	0	0			3								0	0	TRUE		-1.10786	0.0805227		TCONS_00005258	XLOC_004229
AK011616	ncRNA		BC052330	-479							AK002301,BC013462,BC052330,BC115512,BC115513,BC128489,NM_019441,NM_030890	929	0	0	929	0	1	0	0					1	1					173.143	0.186			-1.01584	0.120908	-55.5653	TCONS_00012034	XLOC_009331
AK011638	ncRNA						BC023016,DQ448594,BC027786,NM_146122,AK220407,AK137530	AK137530				1475	0	0	1475	0	1	0	0	1		4								222.405	0.151			-0.423598	0.0195069		TCONS_00016344	XLOC_012627
AK011653	ncRNA		BC013532	-19							AK011243,AK038378,BC013532,NM_028083	1462	0	0	1467	0	1	0	0			2			1					139.336	0.095			-1.289	0.34118	27.218	TCONS_00011762	XLOC_009120
AK011677	ncRNA						AY080897,NM_139226,BC058700	BC058700				853	0	0	855	0	1	0	0											22.437	0.026			-1.27615	0.0667027		TCONS_00002369	XLOC_001895
AK011682	ncRNA	TRUE										1390	0	127747	129137	2	0.011	0	1.439							uc007meh.2		2610035D17Rik	Mus musculus 10 days embryo whole body cDNA, RIKEN full-length enriched library, clone:2610035D17 product:unclassifiable, full insert sequence.	70.274	0.051	TRUE		1.11352	0.136841		TCONS_00005087	XLOC_004101
AK011718	ncRNA									BC026640		865	0	0	865	0	1	0	0	1				1	1					105.494	0.122			-1.19487	0.0424336	-73.548	TCONS_00012478	XLOC_009705
AK011788	ncRNA	TRUE										981	0	0	981	0	1	0	0					2	4					91.964	0.094	TRUE		-0.886882	0.0228641		TCONS_00001205	XLOC_000901
AK011823	ncRNA	TRUE										1150	0	0	1153	0	1	0	0						1					143.573	0.125			-1.08671	0.0595898	-90.3654	TCONS_00028176	XLOC_022002
AK011859	ncRNA						BC139007,NM_027375,BC145495,AB093232,AK148283,BC023811,BC034077,BC065697	AB093232				749	0	0	749	0	1	0	0			1								33.266	0.044			-1.31355	0.0115371		TCONS_00002231	XLOC_001776
AK011866	ncRNA											662	0	66971	67633	3	0.01	0	4.532			1								172.073	0.26			0.0546341	0.191583	-123.897	TCONS_00001020	XLOC_000748
AK011873	ncRNA									AK152665		1641	0	0	1650	0	1	0	0			5								168.809	0.103			-1.36232	0.0329667	-105.357	TCONS_00003532	XLOC_002853
AK011877	ncRNA								AK077779			979	0	9072	10051	1	0.097	0	1.021			2				uc007rtk.1		AK011877	Mus musculus 10 days embryo whole body cDNA, RIKEN full-length enriched library, clone:2610204G07 product:unclassifiable, full insert sequence.	248.155	0.253			-0.979822	0.0728966	-337.368	TCONS_00007358	XLOC_005658
AK011933	ncRNA								AK141003			793	0	0	793	0	1	0	0											447.961	0.565			-0.59434	0.208864	144.775	TCONS_00004708	XLOC_003783
AK011940	ncRNA	TRUE										503	0	0	503	0	1	0	0					1	1					57.468	0.114			-1.09496	0.00202965		TCONS_00000125	XLOC_000112
AK011946	ncRNA	TRUE										1774	0	11964	13751	1	0.13	0	0.564			5		1	2					157.608	0.089			-1.03674	0.0513153	-320.42	TCONS_00023593	XLOC_018395
AK011948	ncRNA		NM_019774	-229					BC003242			1135	0	0	1137	0	1	0	0											327.666	0.289			-1.14206	0.147946	43.9719	TCONS_00012024	XLOC_009321
AK011983	ncRNA	TRUE										439	0	0	439	0	1	0	0											59.319	0.135			-1.26	0.0234983		TCONS_00007620	XLOC_005859
AK012000	ncRNA						AF130471,AK016510,AK036675,AK007414,BC145765,AK171734,AB041583,NM_013863	NM_013863			AJ250687,AK214932	612	0	0	612	0	1	0	0											25.671	0.042			-1.1797	0.036509		TCONS_00024806	XLOC_019394
AK012018	ncRNA						NM_054053,AF435926,JQ013292,AF405694,AF405693,AF405692	AF435926				1127	0	0	1127	0	1	0	0			1			1					11.39	0.01			-1.03714	0.0166801		TCONS_00008044	XLOC_006112
AK012020	ncRNA		AK003415	-241							AB025407,AK003415,AK144059,AK167571,AK168206,AK169309,AK170172,AK180958,BC072575,NM_019772	1203	0	0	1203	0	1	0	0					3	3					36.142	0.03			-0.974196	0.0768515		TCONS_00025515	XLOC_019912
AK012034	ncRNA		AK190094	390						BC172169	BC042430,BC051985,NM_010722,X54098	818	0	0	818	0	1	0	0			1		2	3					281.801	0.344			-1.3516	0.667575		TCONS_00002373	XLOC_001899
AK012038	ncRNA		NM_145831	-157							AF539811,AK044891,AK140337,AK140347,NM_145831	689	0	0	689	0	1	0	0			1								38.859	0.056			-1.343	0.0703015		TCONS_00014563	XLOC_011238
AK012039	ncRNA						NM_175506,AY135183,BC150736	BC150736				1105	0	0	1115	0	1	0	0			4			5					32.558	0.029			-1.2126	0.0115396		TCONS_00013252	XLOC_010287
AK012053	ncRNA						AK086012,AK082875,AK081754,AK088371,NR_030780.1,NR_030779,NM_133971,AK084456,BC002198,AK039879,AK014768,NR_030781,AK050983,AK038156,AK042500,AK033623,AK031808,NM_001167967	BC002198				885	0	0	889	0	1	0	0			2								49.816	0.056			-1.22409	0.0255088		TCONS_00026585	XLOC_020660
AK012089	ncRNA						AK129398,NM_001168321	NM_001168321			AK053309,NM_029510,NM_175044,NM_175045,NM_175046	566	0	0	566	0	1	0	0			1								374.9	0.662			-1.1056	0.0476715	-441.233	TCONS_00029351	XLOC_022938
AK012139	ncRNA						AF061569,BC051679,AK013940,AK044850,NM_009951	NM_009951				733	0	0	733	0	1	0	0					1	3					46.123	0.063			-1.14673	0.0378451		TCONS_00004932	XLOC_003974
AK012160	ncRNA									AK042968		1267	0	0	1267	0	1	0	0			5		1	1					247.612	0.195	TRUE		-1.15352	0.0275654		TCONS_00019588	XLOC_015149
AK012193	ncRNA						AK172374,AK010312,BC020104,AK154622,AK169983,NR_045520,NM_029624,AK041659,AK177501,AK183502	AK041659				950	0	0	950	0	1	0	0											195.084	0.205			-1.13338	0.0433544	-19.6529	TCONS_00011967	XLOC_009277
AK012207	ncRNA						NM_001172095,BC042424,BC020180,AK144103,NM_144787,AK173023	BC042424				313	0	0	313	0	1	0	0															-1.18915	0.00394236		TCONS_00019208	XLOC_014835
AK012210	ncRNA	TRUE										406	0	0	406	0	1	0	0											9.493	0.023			-1.27669	0.0044316		TCONS_00008804	XLOC_006722
AK012214	ncRNA		AK007578	-172						NM_025750		982	0	25489	26471	4	0.037	0	4.073					1		uc007qbw.1		AK012214	Mus musculus 11 days embryo whole body cDNA, RIKEN full-length enriched library, clone:2700007L21 product:peroxisomal delta3, delta2-enoyl-Coenzyme A isomerase, full insert sequence.	110.279	0.112			-1.12803	0.016452		TCONS_00006836	XLOC_005322
AK012219	ncRNA	TRUE										1197	0	0	1199	0	1	0	0			1		1						203.775	0.17			-0.428084	0.01223		TCONS_00008663	XLOC_006615
AK012223	ncRNA						U49949,BC079549.2,AB041925,AB035697,NM_176893,NM_016713,NM_001045964,NM_001045959,BC052474	U49949	BC048402			622	0	0	622	0	1	0	0			1								126.547	0.203			-0.941748	0.0313765	-1.3947	TCONS_00003792	XLOC_003075
AK012238	ncRNA		NM_011378	-362					NM_001110351			684	0	114	798	1	0.857	0	1.462					1	2	uc009ptw.1		AK012238	Mus musculus 11 days embryo whole body cDNA, RIKEN full-length enriched library, clone:2700012I20 product:unclassifiable, full insert sequence.	186.585	0.273			0.142627	0.0465512		TCONS_00028321	XLOC_022110
AK012244	ncRNA						AK017346,AK046748,BC099971,NM_183186	NM_183186	AK014365			2158	0	0	2158	0	1	0	0			1								101.959	0.047			-1.26282	0.0350925		TCONS_00006418	XLOC_005072
AK012249	ncRNA		NM_001160319	-276	BC056952	946			AK044277		AK086097,NM_001160319	706	0	0	706	0	1	0	0			1		1						94.841	0.134			-1.35729	0.0279473		TCONS_00020384	XLOC_015840
AK012274	ncRNA		AB041598	-133							AB041598,AK018784,AK135958,AK145432,AK145518,AK158773,AK159495,BC079558,BC145164,BC145700,NM_023773	1015	0	0	1015	0	1	0	0			2								147.64	0.145			-1.14137	0.0270818		TCONS_00009116	XLOC_006985
AK012291	ncRNA								AK088395		AF286161,AK032325,AK042324,AK078212,AK088395,AK153117,BC010215,NM_031257	991	0	0	993	0	1	0	0					1						272.712	0.275			-1.2289	0.0149997	-25.5212	TCONS_00025821	XLOC_020160
AK012303	ncRNA						AK045967,NM_009990,NM_001039162,BC053048,BC039162,AK172928,BC121191	BC121191				1460	0	0	1462	0	1	0	0			3								264.391	0.181			-1.20656	0.0369325		TCONS_00022201	XLOC_017313
AK012318	ncRNA	TRUE										775	0	2993	3768	3	0.206	0	3.871											113.291	0.146			-1.18894	0.041283		TCONS_00000485	XLOC_000415
AK012323	ncRNA						AK037303,BC156350,NM_001080931,AK129168	NM_001080931	AK014588			962	0	0	976	0	1	0	0			1								59.614	0.062			-0.252246	0.00531114		TCONS_00004854	XLOC_003904
AK012397	ncRNA		AK179622	47					NM_001136066	AK028439		1360	0	0	1360	0	1	0	0			2		1	1					112.517	0.083			-1.2075	0.0472575	-99.9679	TCONS_00011293	XLOC_008716
AK012412	ncRNA						AK032173,AF458899,AF361349,NM_133189,BC141277	AK032173				335	0	0	335	0	1	0	0											57.993	0.173			-0.98182	0.0262766		TCONS_00024143	XLOC_018852
AK012417	ncRNA	TRUE			Guttman10_novel_lincs_TCONS_00001073	-592			Guttman10_novel_lincs_TCONS_00001074			863	0	0	864	0	1	0	0	1		2								53.508	0.062	TRUE		-1.22797	0.0605232		TCONS_00009428	XLOC_007230
AK012419	ncRNA		AK016557	-210								4315	0	214200	218515	4	0.02	0	0.927	1		2		1		uc008amj.1		Tcte2	Mus musculus adult male testis cDNA, RIKEN full-length enriched library, clone:1700011N08 product:t-complex-associated testis expressed 2, full insert sequence.	486.744	0.113			-1.00662	0.173782		TCONS_00012350	XLOC_009606
AK012449	ncRNA									AK173278		1098	0	0	1098	0	1	0	0	1		2								117.698	0.107			0.16494	0.0309311		TCONS_00024180	XLOC_018884
AK012462	ncRNA	TRUE			AK089897	519						1582	0	0	1585	0	1	0	0			2		2	5					79.062	0.05			-0.0485331	0.0166002		TCONS_00011852	XLOC_009196
AK012473	ncRNA									NM_010636		678	0	0	678	0	1	0	0	1		4		1	1					618.38	0.912			-1.31996	0.0306172	-113.887	TCONS_00009408	XLOC_007215
AK012482	ncRNA						AK133666,BC113156,NM_172868,AK045344	AK133666	AY618199.1			338	0	0	338	0	1	0	0											149.374	0.442			-1.0064	0.0107724		TCONS_00019152	XLOC_014792
AK012503	ncRNA	TRUE										1867	0	1357	3229	1	0.58	0	0.536			4								151.832	0.081			-1.15	0.065693		TCONS_00020178	XLOC_015666
AK012507	ncRNA		NM_010320	-718						AK183974	AK144609,NM_010320	1662	0	0	1662	0	1	0	0			5		2	5					272.093	0.164			-1.17046	0.0932547		TCONS_00024946	XLOC_019501
AK012511	ncRNA				AK199741	625	AK168978,NM_027276,BC026606,AK147938,AK167965,AK013213,AK214776,AK184459,AK205790,AK181696,AK188605,AK184248,AK198756,BC005658	AK167965				1403	0	0	1405	0	1	0	0											151.348	0.108			-1.06519	0.080428		TCONS_00025772	XLOC_020118
AK012529	ncRNA						BC062927,U72523,U72522,U72521,U72520,NM_010135,NM_008680,NM_001083121,NM_001083120	BC062927				1445	0	0	1445	0	1	0	0	1		5		1						240.487	0.166			-0.290354	0.0165303		TCONS_00001910	XLOC_001503
AK012587	ncRNA								AK002860			554	0	0	554	0	1	0	0			1								209.022	0.377			-1.15072	0.0109665		TCONS_00004029	XLOC_003264
AK012611	ncRNA											201	0	430753	430954	3	0	0	14.925					1	1					2.221	0.011			0.143525	0.0554896		TCONS_00027719	XLOC_021619
AK012625	ncRNA		AK155770	-50							AK039627,AK146872,AK154226,AK154602,AK155459,AK155770,BC066009,NM_145476	590	0	0	590	0	1	0	0					1						4.056	0.007			-0.464116	0.0471312	-48.8673	TCONS_00010529	XLOC_008116
AK012671	ncRNA						AK144620,BC067068,NM_207522,AK148535	AK148535			AK009028,AK036330,AK047009,BC013721	1351	0	0	1352	0	1	0	0	2		3		1						94.681	0.07			-1.15841	0.0173108		TCONS_00003256	XLOC_002625
AK012708	ncRNA						AK163368,AK172048,AK159232,BC039275,NM_178041,NM_173363,AK076403,AK167331,BC042622,AK160828,BC025557,AK166775	AK076403				748	0	0	748	0	1	0	0			2								31.138	0.042			-0.130836	0.0164646		TCONS_00005961	XLOC_004693
AK012713	ncRNA	TRUE	AK030540	-127								2932	0	43785	46717	1	0.063	0	0.341			12		1	1	uc007oyh.1		AK012713	Mus musculus 10, 11 days embryo whole body cDNA, RIKEN full-length enriched library, clone:2810011L19 product:RIKEN cDNA 2810011L19 gene, full insert sequence.	751.857	0.256		Megamind	1.39127	0.121537	172.538	TCONS_00005736	XLOC_004633
AK012749	ncRNA	TRUE										2342	0	689	3041	1	0.773	0	0.427			3								391.933	0.167	TRUE		-0.0144117	0.24144		TCONS_00023937	XLOC_018674
AK012752	ncRNA						AK162742,AK052145,BC048174,AF321909,AK147185,BC050747,AK122205,AK163977,AK161135,AK141921,NM_030722,NM_001159606,NM_001159605,NM_001159604,NM_001159603,AK154059	AK162742				817	0	0	817	0	1	0	0			2		1	1					92.417	0.113				0.0272823		TCONS_00019544	XLOC_015112
AK012754	ncRNA	TRUE										1354	0	0	1355	0	1	0	0			2		1	2					218.733	0.162		Snhg4	-1.13318	0.0394842		TCONS_00013100	XLOC_010167
AK012862	ncRNA		NM_024193	-142						AK046059	AK009799,AK011481,AK011744,AK013528,AK030730,AK077795,AK139924,AK146243,AK150258,AK154024,AK193733,BC002231,BC021355,NM_024193	496	0	0	496	0	1	0	0			1								15.725	0.032			-0.987472	0.0527014	-65.6338	TCONS_00016887	XLOC_013069
AK012876	ncRNA									NM_001164705		2210	0	0	2210	0	1	0	0	1		7		1						531.174	0.24			-0.94394	0.0268103	-153.202	TCONS_00008582	XLOC_006545
AK012879	ncRNA	TRUE										420	0	0	420	0	1	0	0			1												-0.806932	0.0723368		TCONS_00008479	XLOC_006462
AK012892	ncRNA						BC036997,NM_013889,AK017652	AK017652				1353	0	0	1353	0	1	0	0			6								95.446	0.071			-0.0463123	0.0799304		TCONS_00019839	XLOC_015368
AK012901	ncRNA						NM_001253862,X64840,NM_011544,NM_001253865,BC037097,M97635,AK134037,AK169800,AK143246	NM_001253862				1835	0	0	1845	0	1	0	0			4								116.215	0.063			-0.193711	0.0218154		TCONS_00028444	XLOC_022217
AK012911	ncRNA	TRUE										2237	0	3090	5327	3	0.42	0	1.341			5								64.741	0.029			0.567289	0.0907794		TCONS_00024176	XLOC_018880
AK012918	ncRNA						U65418,AF128865,BC141294,NM_008744	NM_008744				1641	0	0	1667	0	1	0	0			7								304.762	0.186			-1.08161	0.0372331		TCONS_00004702	XLOC_003777
AK012922	ncRNA									AK088235		1129	0	0	1129	0	1	0	0			6								132.862	0.118			-1.19708	0.0582117		TCONS_00025768	XLOC_020114
AK012924	ncRNA	TRUE										845	0	0	845	0	1	0	0			6		1	1					120.577	0.143			-0.914096	0.00977979		TCONS_00023936	XLOC_018673
AK012934	ncRNA						BC054767,AF163665,AF282322,AK146964,AK155238,AK004716,NM_011818,AF186095	AF186095				2750	0	0	2750	0	1	0	0	1		4			1					376.34	0.137			-0.226288	0.0275719		TCONS_00023718	XLOC_018496
AK012940	ncRNA							AK131141			AK088333,AK089979,AK131141,AK141537,BC031743,NM_177333	577	0	0	577	0	1	0	0	1										9.067	0.016			-1.28535	0.0660398	-35.0138	TCONS_00008015	XLOC_006092
AK012942	ncRNA											1113	372	73071	74184	1	0.015	0.334	0.898			2		1	1					221.532	0.199		Airn	0.579349	0.245749	-30.257	TCONS_00011871	XLOC_009208
AK012955	ncRNA											1011	0	361061	362072	8	0.003	0	7.913			3		1	1	uc007zsj.2		2810055G20Rik	Mus musculus 10, 11 days embryo whole body cDNA, RIKEN full-length enriched library, clone:2810055G20 product:unclassifiable, full insert sequence.	457.465	0.452			-0.11875	0.0144255		TCONS_00011131	XLOC_008604
AK012964	ncRNA								AK141175			943	0	0	943	0	1	0	0			1		1	1					281.722	0.299			-1.09856	0.102786		TCONS_00004487	XLOC_003639
AK012965	ncRNA	TRUE										788	0	0	788	0	1	0	0			1			1					48.653	0.062	TRUE		-0.943817	0.0519304	-122.234	TCONS_00008366	XLOC_006363
AK012972	ncRNA		AK050539	-301								874	0	39240	40114	3	0.022	0	3.432			2		1		uc009ucp.1		AK012972	Mus musculus 10 day old male pancreas cDNA, RIKEN full-length enriched library, clone:1810022M18 product:unclassifiable, full insert sequence.	111.049	0.127	TRUE		-1.02613	0.0690962	-45.6702	TCONS_00029122	XLOC_022759
AK012974	ncRNA	TRUE										1602	0	806	2425	1	0.668	0	0.624			1		1	2					61.474	0.038	TRUE		-0.419118	0.0948146		TCONS_00008261	XLOC_006272
AK012982	ncRNA	TRUE										1702	0	585	2289	1	0.744	0	0.588			2		1	1					67.862	0.04			-0.916528	0.0155854	-42.7365	TCONS_00011772	XLOC_009130
AK012984	ncRNA						BC038935,AK147893,NM_177464,AK082926	AK082926	BC125035			1927	0	0	1927	0	1	0	0			6								99.883	0.052			-0.467225	0.00438232		TCONS_00014220	XLOC_010994
AK012993	ncRNA									NM_001126318		1114	0	0	1114	0	1	0	0			1		1	1					52.233	0.047	TRUE		-1.12579	0.104221	-18.489	TCONS_00020375	XLOC_015832
AK013001	ncRNA	TRUE										931	0	0	931	0	1	0	0			2		1	1					122.682	0.132				0.208362		TCONS_00009536	XLOC_007319
AK013021	ncRNA		AK041784	450					AK041784		AK041784	326	0	0	326	0	1	0	0											4.623	0.014				0.0436514		TCONS_00011708	XLOC_009078
AK013066	ncRNA		NM_025901	-131							AK005152,AK010875,AK021353,AK031110,AK088206,BC025898,NM_025901	880	0	0	880	0	1	0	0			1								59.675	0.068			-1.09927	0.178606		TCONS_00017258	XLOC_013335
AK013067	ncRNA	TRUE	AK156835	-224							AJ002198,AK090112,AK156835,BC089018,NM_008672	571	0	0	571	0	1	0	0					1	1					162.818	0.285			-0.915782	0.0472334	-59.0984	TCONS_00024888	XLOC_019456
AK013077	ncRNA									BC005693		2028	0	0	2028	0	1	0	0			3								254.274	0.125			0.0230938	0.0524695		TCONS_00028520	XLOC_022281
AK013087	ncRNA								BC019664			639	0	0	639	0	1	0	0											42.49	0.066			-1.0864	0.0311661		TCONS_00007435	XLOC_005714
AK013093	ncRNA	TRUE										1039	0	0	1049	0	1	0	0					1						117.498	0.113			-1.17918	0.011855		TCONS_00001675	XLOC_001305
AK013094	ncRNA						AB221575,Y14295,BC067408,NM_010636	NM_010636				1151	0	0	1152	0	1	0	0											94.39	0.082			-1.18051	0.0192311	-208.44	TCONS_00009411	XLOC_007217
AK013112	ncRNA						BC028647,NM_146092,BC020299,AK077149,NM_001177798,AK144881	BC020299				520	0	0	520	0	1	0	0			1		1	1					61.738	0.119			-1.04348	0.0159194		TCONS_00014478	XLOC_011167
AK013121	ncRNA	TRUE										1163	0	0	1164	0	1	0	0			3								78.193	0.067			-1.2966	0.0417667		TCONS_00011599	XLOC_008983
AK013159	ncRNA		NM_133998	-125							AF391115,AK076516,AK088306,AK160157,BC034216,NM_133998	992	0	0	992	0	1	0	0					1						112.367	0.113			-0.956808	0.119681		TCONS_00002351	XLOC_001879
AK013168	ncRNA						BC030903,AK053183,NM_175934,AJ504718,NM_001163818,BC052059	NM_175934	AF115851.2		AK145485	592	0	0	592	0	1	0	0			1								45.45	0.077			-1.28943	0.0114532	-392.372	TCONS_00012046	XLOC_009343
AK013171	ncRNA						BC019181,AB105178,NM_138755,NM_001109691,AK037174,AK129424,AK137085,NM_001109690,AK152359	NM_138755				933	0	0	933	0	1	0	0	1		1		1						262.378	0.281			-1.07085	0.11205		TCONS_00015445	XLOC_011938
AK013182	ncRNA											1758	0	0	1758	0	1	0	0			5		1	1					291.189	0.166			-0.932398	0.0976592		TCONS_00018787	XLOC_014495
AK013187	ncRNA		AK040528	-169								1037	0	8464	9501	2	0.109	0	1.929						1	uc009nwu.1		AK013187	Mus musculus 10, 11 days embryo whole body cDNA, RIKEN full-length enriched library, clone:2810428N17 product:unclassifiable, full insert sequence.	189.761	0.183			-0.946337	0.262404	-25.6058	TCONS_00026503	XLOC_020593
AK013191	ncRNA	TRUE										835	0	19460	20295	4	0.041	0	4.79			3				uc007pis.2		2810429I04Rik	Mus musculus adult male testis cDNA, RIKEN full-length enriched library, clone:1700024F13 product:Warning: possibly chimeric clone, full insert sequence.	1.437	0.002	TRUE		-0.911863	0.00407252		TCONS_00006682	XLOC_005196
AK013208	ncRNA						AK138313,NM_181595,BC053748,AB091828,AK029737,AY308065,AK122472	AK138313				1525	0	0	1528	0	1	0	0			1								71.096	0.047			-1.17189	0.0561797		TCONS_00022376	XLOC_017447
AK013224	ncRNA								AK147478			700	0	0	700	0	1	0	0					1						127.089	0.182			-1.17709	0.0886077		TCONS_00021277	XLOC_016564
AK013242	ncRNA											780	0	117970	118750	2	0.007	0	2.564	1		1		1						88.733	0.114		Airn	-1.00507	0.0681535		TCONS_00011870	XLOC_009208
AK013290	ncRNA		AK041978	-256						NM_019549		941	0	15019	15960	3	0.059	0	3.188			2		1		uc007ibs.1		AK013290	Mus musculus 10, 11 days embryo whole body cDNA, RIKEN full-length enriched library, clone:2810442I21 product:unclassifiable, full insert sequence.	27.012	0.029	TRUE		-1.20479	0.0772822		TCONS_00004314	XLOC_003495
AK013308	ncRNA	TRUE										1273	0	1828	3101	1	0.411	0	0.786	1		4		1		uc007rim.1		C130071C03Rik	Mus musculus 10, 11 days embryo whole body cDNA, RIKEN full-length enriched library, clone:2810449C10 product:unclassifiable, full insert sequence.	581.641	0.457	TRUE		-1.0688	0.0456045	-190.364	TCONS_00007241	XLOC_005558
AK013311	ncRNA		DQ788834	220							AK014866,AK018322,AK170321,BC052355,DQ788834,NM_001146342,NM_001167818	985	0	0	985	0	1	0	0					1	2					135.731	0.138			-1.15912	0.00855187		TCONS_00014154	XLOC_010941
AK013313	ncRNA		NM_026234	-167	BC037038	886					AK018560,AK040397,AK043216,AK044641,AK080242,AK082746,AK088117,AK148197,BC005650,BC083115,NM_026234	1392	0	0	1392	0	1	0	0			2		1	1					70.717	0.051			-0.0973469	0.00403158		TCONS_00001833	XLOC_001438
AK013318	ncRNA						AK196961,NM_146222,BC066002	AK196961				804	0	0	806	0	1	0	0			1		1	2					72.113	0.09			-1.01647	0.0312394		TCONS_00027418	XLOC_021365
AK013351	ncRNA						AK029343,NM_030138,AK147319,AB490692,AK129041,AK020591	AK129041				1212	0	0	1212	0	1	0	0			3								89.259	0.074			-1.14973	0.0128093	-82.1166	TCONS_00011429	XLOC_008837
AK013353	ncRNA									AK085249		1627	0	0	1629	0	1	0	0	2		4		1	1					221.33	0.136			-1.28792	0.00623409		TCONS_00014117	XLOC_010910
AK013357	ncRNA									BC024705		1690	0	542	2233	1	0.757	0	0.592			2								99.037	0.059			-0.227287	0.084356		TCONS_00027237	XLOC_021211
AK013359	ncRNA		AK034323	463					NM_001037221			1258	0	106	1367	1	0.922	0	0.795			1		1	1					968.92	0.77			0.176663	0.153092		TCONS_00009068	XLOC_006943
AK013363	ncRNA								NM_009205	BC129880		977	0	0	977	0	1	0	0			2		1						225.26	0.231			-1.32989	0.080361	-299.398	TCONS_00012791	XLOC_009953
AK013369	ncRNA	TRUE	DQ860415	-970					Belgard_TCONS_02337915			283	0	0	283	0	1	0	0					2	2					128.778	0.455			-1.00594	0.0781198		TCONS_00016056	XLOC_012402
AK013372	ncRNA	TRUE										918	0	0	918	0	1	0	0			1				uc007zwh.1		AK013372	Mus musculus 10, 11 days embryo whole body cDNA, RIKEN full-length enriched library, clone:2810462E17 product:unclassifiable, full insert sequence.					2.44805	0.32068		TCONS_00011726	XLOC_009095
AK013383	ncRNA						AY442689,BC029157,AK155145,NM_146014,NM_001190343	NM_001190343			AK155145,AY442689,BC029157,NM_001190343,NM_146014	507	0	0	507	0	1	0	0			2		1	1					90.758	0.179			-1.14122	0.0377513		TCONS_00003467	XLOC_002796
AK013401	ncRNA						AK080722,AK046249,NM_001122768,AK137459,AK050400,BC037717,NM_178701	AK137459			AK167985	797	0	0	797	0	1	0	0			4			1					34.254	0.043			-0.996989	0.0588087		TCONS_00021049	XLOC_016379
AK013430	ncRNA						AK079084,BC059216,AK048655,NM_172614,BC080307,AK045675,AK031524,AK082652	AK045675				783	0	0	785	0	1	0	0			2								10.099	0.013			-1.1152	0.101659		TCONS_00011425	XLOC_008834
AK013450	ncRNA								BC141036			879	0	101	980	1	0.897	0	1.138			3		1						122.777	0.14			-0.935139	0.0173687		TCONS_00000294	XLOC_000249
AK013453	ncRNA	TRUE										787	0	29748	30535	3	0.026	0	3.812			1				uc008xvd.1		AK013453	Mus musculus 10, 11 days embryo whole body cDNA, RIKEN full-length enriched library, clone:2810489J07 product:hypothetical protein, full insert sequence.	100.594	0.128			-0.875378	0.230578		TCONS_00020898	XLOC_016251
AK013458	ncRNA	TRUE							AK016032			411	0	0	411	0	1	0	0			1								16.335	0.04			-1.43319	0.00888939		TCONS_00025663	XLOC_020034
AK013461	ncRNA								AK138161	AJ001692		1837	0	0	1837	0	1	0	0			1		2	3					267.474	0.146			-0.918123	0.0585418	-8.8679	TCONS_00012014	XLOC_009313
AK013470	ncRNA	TRUE										1544	0	0	1544	0	1	0	0			3								89.844	0.058			-1.04699	0.0787107		TCONS_00014081	XLOC_010883
AK013479	ncRNA						AK083260	AK083260		AK083260		531	0	0	531	0	1	0	0											11.679	0.022			-0.952527	0.0342911		TCONS_00005286	XLOC_004247
AK013480	ncRNA		AK015942	161						BC056653		2070	0	25970	28040	1	0.074	0	0.483			3		1		uc009rzh.1		AK013480	Mus musculus adult male hippocampus cDNA, RIKEN full-length enriched library, clone:2900003F04 product:5-azacytidine induced gene 2, full insert sequence.	380.732	0.184			1.9724	0.0306053		TCONS_00028751	XLOC_022475
AK013482	ncRNA						NM_001160403,AK081272,BC119580	NM_001160403				1113	0	0	1113	0	1	0	0	1		4								28.996	0.026			-1.17505	0.026932	-163.319	TCONS_00029716	XLOC_023101
AK013487	ncRNA						AF212924,L40632,BC021657,NM_170730,NM_170729,NM_170728,NM_170690,NM_170689,NM_170688,NM_146005,AK141720,U89275,U89274	NM_146005				797	0	0	797	0	1	0	0			1								59.979	0.075			-1.01843	0.0251642		TCONS_00002312	XLOC_001846
AK013488	ncRNA						AK079308,AK079068,BC058705,AK054062,NM_172563,BC057693	AK079068				1268	0	0	1269	0	1	0	0											214.45	0.169			-0.889822	0.0699993	-160.349	TCONS_00004908	XLOC_003952
AK013492	ncRNA						AK164171	AK164171				473	0	0	473	0	1	0	0	1		2								45.383	0.096			-1.04247	0.00958467		TCONS_00010958	XLOC_008460
AK013499	ncRNA				AK037549	-933				AK134943		1617	0	0	1623	0	1	0	0			2		1	1					273.694	0.169			-0.44647	0.0520124		TCONS_00010505	XLOC_008095
AK013501	ncRNA									AK158121		530	0	0	530	0	1	0	0			1								28.476	0.054			-1.18465	0.043534	-225.405	TCONS_00023308	XLOC_018163
AK013525	ncRNA		AK031649	-486							AK031649,AK052348,BC047151,NM_001077202	1667	0	0	1667	0	1	0	0			3								62.671	0.038			-1.1431	0.0345848	-135.162	TCONS_00028949	XLOC_022617
AK013526	ncRNA									AK007806		1221	0	0	1227	0	1	0	0			2		1						155.134	0.127				0.090983		TCONS_00009308	XLOC_007134
AK013530	ncRNA						NM_001170787,NM_001033359,AK162856,AK138164	AK138164				1432	0	0	1432	0	1	0	0			6								28.858	0.02			-1.25889	0.00902403		TCONS_00028051	XLOC_021893
AK013539	ncRNA									BC024427		526	0	0	526	0	1	0	0					1	1					166.038	0.316			-0.754411	0.14422	17.4679	TCONS_00005159	XLOC_004156
AK013544	ncRNA						NM_001035243,NM_001035242,NM_001035241,NM_001035240,NM_001035239,AJ544536,AJ544535,AJ544534,AJ544533,AJ544532,AK173218,AK044454,JF706722,JX644986,JX644985,JX644984,JX644983,JX644982,JX644981,JX644980,JX644979,JX644978,JX644977,JX644976,JX644975,JX644974,JX644973,JX644972,JX644971,JX644970,HM064411,HM064410,HM064409,HM064408,HM064407,BC141412,BC141400,NM_177341,AK053673,AK046908,NM_001035244,AK142…	AK173218				1504	0	0	1504	0	1	0	0			5		1	1					31.76	0.021			-1.24045	0.0352587	-151.344	TCONS_00014106	XLOC_010903
AK013545	ncRNA						AK004277,AK136135,BC058365,AK169605,AK152352,AK002371,AK152287,NM_025645,AK215871	NM_025645				876	0	0	876	0	1	0	0	1					1					132.034	0.151			-0.403499	0.0345811		TCONS_00019540	XLOC_015108
AK013547	ncRNA								BC058741			652	0	0	652	0	1	0	0	1		10		1	1										0.00960662		TCONS_00022628	XLOC_017633
AK013549	ncRNA						NM_001128086,NM_001177397,BC098373,AK019361,AK034154,AK049899,AK132228,AK163750,NM_181398,NM_001177398,NM_001177396,AK032211	NM_001128086				1529	0	0	1529	0	1	0	0			3								145.84	0.095			-1.29063	0.0726292		TCONS_00002431	XLOC_001947
AK013551	ncRNA						BC156990,BC148654,AY487425,AK163530,AK032593,NM_172858,AK079080,BC099417	AK079080				465	0	0	465	0	1	0	0			2								26.384	0.057			-1.17025	0.00674541		TCONS_00016929	XLOC_013102
AK013552	ncRNA						AK146680,AB221660,AK140748,AK134321,AK168684,U33630,U33629,NM_010789,NM_001193271,BC023689,AK132298	NM_001193271				1580	0	0	1580	0	1	0	0	1		6								310.651	0.197			-1.14693	0.0542244		TCONS_00004326	XLOC_003502
AK013553	ncRNA						AK165834,AY348864,NM_001170556,NM_001170555,AK032238,BC015283,AK154296,NM_145401,AK010703	NM_001170555	AK016926			791	0	0	793	0	1	0	0			2								48.252	0.061			-1.18984	0.0482941		TCONS_00021534	XLOC_016782
AK013555	ncRNA									NM_025736		1706	0	0	1711	0	1	0	0			8			1					84.48	0.05			-1.12451	0.0215813		TCONS_00009734	XLOC_007484
AK013565	ncRNA						AK215458,AB305046,AB297383,BC025020,BC025429,AK012931,AK031824,AK076045,NM_026037,NM_001083341,AK034873,AK033106	AK215458				893	0	0	893	0	1	0	0											60.456	0.068			-1.32211	0.027816		TCONS_00005279	XLOC_004242
AK013567	ncRNA	TRUE										1250	0	0	1250	0	1	0	0			1		1	2					104.844	0.084				0.0248558		TCONS_00016921	XLOC_013097
AK013574	ncRNA								NM_001081330			1477	0	0	1478	0	1	0	0	1		1								127.858	0.087			-0.95569	0.383429	-60.8332	TCONS_00003784	XLOC_003067
AK013576	ncRNA						AY168406,BC079670,BC099951,NM_175642,AK129162	BC079670				1016	0	0	1017	0	1	0	0	1		3		1	3					44.492	0.044			0.0949905	0.0598879		TCONS_00001133	XLOC_000834
AK013577	ncRNA						AK165307,D13802,D26532,AK051758,NM_009821,NM_001111023,BC069929,AK137493,AK145098,NM_001111022,NM_001111021	NM_001111023				707	0	0	708	0	1	0	0			1								22.105	0.031				0.0171655		TCONS_00011745	XLOC_009111
AK013579	ncRNA									AK139013		796	0	0	797	0	1	0	0	2		1								79.902	0.1			-1.23975	0.00120938		TCONS_00021511	XLOC_016761
AK013581	ncRNA	TRUE										569	0	0	569	0	1	0	0			1								26.26	0.046			-1.15881	0.00945116		TCONS_00007486	XLOC_005758
AK013589	ncRNA	TRUE										1650	0	0	1650	0	1	0	0			2								217.496	0.132			-1.00671	0.0551648		TCONS_00008587	XLOC_006550
AK013590	ncRNA									AF022770		1060	0	0	1065	0	1	0	0			1								125.138	0.118	TRUE		-0.983183	0.0726944		TCONS_00000888	XLOC_000645
AK013601	ncRNA								AK009229	AK160294		427	0	0	427	0	1	0	0			2		1						4.957	0.012			-1.02521	0.0253902	-252.154	TCONS_00016962	XLOC_013131
AK013604	ncRNA						AK032202,NM_173446,BC117535	BC117535				1945	0	0	1945	0	1	0	0			7								124.89	0.064			-1.19363	0.191695	-39.6372	TCONS_00026576	XLOC_020652
AK013612	ncRNA						BC051993	BC051993				1241	0	0	1241	0	1	0	0											162.794	0.131			-1.03441	0.0295827	-298.836	TCONS_00019354	XLOC_014958
AK013617	ncRNA						BC068155,D86949,NM_008882,AK122289	NM_008882				530	0	0	532	0	1	0	0			2			1					338.66	0.639				0.0596577		TCONS_00000973	XLOC_000717
AK013618	ncRNA						BC115712,AK038547,NM_175500	NM_175500				416	0	0	416	0	1	0	0			2			1					20.256	0.049			-1.05094	0.00846752		TCONS_00008781	XLOC_006702
AK013627	ncRNA	TRUE										452	0	412	864	1	0.523	0	2.212					1		uc007urg.1		AK013627	Mus musculus adult male hippocampus cDNA, RIKEN full-length enriched library, clone:2900040C04 product:unclassifiable, full insert sequence.	38.254	0.085				0.208033	-18.257	TCONS_00008675	XLOC_006627
AK013628	ncRNA						BC058104,AK172949,NM_201354	AK172949				1308	0	0	1308	0	1	0	0											82.084	0.063			-0.809244	0.164376	-82.172	TCONS_00013852	XLOC_010742
AK013635	ncRNA						BC113162,AF084547,NM_011160,NM_001013833,AK083991	NM_011160				873	0	0	874	0	1	0	0			3								237.893	0.273			-1.37321	0.015865		TCONS_00014617	XLOC_011284
AK013639	ncRNA						AK048160,AF004666,BC079673,U70033,NM_011406,NM_001112798	AK048160				1351	0	0	1351	0	1	0	0											160.921	0.119			-1.24853	0.0258491		TCONS_00012751	XLOC_009922
AK013640	ncRNA						AK137387,AK133006,AF211854,NM_133649,BC062099,NM_133648,AF211855	AK133006				996	0	0	997	0	1	0	0	1		2								103.545	0.104			-1.11923	0.133569		TCONS_00015558	XLOC_012028
AK013641	ncRNA						AY736359,NM_001159850,NM_010607,U73488,AK138427,AK140716,NR_027627.1,BC062094,AK164197	NM_001159850				651	0	0	653	0	1	0	0											71.462	0.11			-1.27643	0.0172684		TCONS_00001940	XLOC_001530
AK013653	ncRNA						AK138656,BC029629,NM_183171,DQ141674	AK138656				656	0	0	670	0	1	0	0			2		1	1					10.812	0.016			-0.756777	0.0196513		TCONS_00027412	XLOC_021359
AK013655	ncRNA						AK137292,AK164914,AK159996,NM_001160292,NM_001110230,NM_001110229,AF090696,NM_001110232,AK160861,NM_001110231	NM_001110229				1066	0	0	1066	0	1	0	0			4								272.464	0.256			-1.19983	0.0210457		TCONS_00016119	XLOC_012454
AK013656	ncRNA						AK172034,AK003779,AK168652,AK168029,AK159739,AK151013,AB046738,NM_023149,BC005532	BC005532			AK131124,AK149751,AK152442,AK152729,AK153040,AK159129,AK191043	568	0	0	568	0	1	0	0											72.727	0.128			-0.827249	0.0322113		TCONS_00013919	XLOC_010801
AK013658	ncRNA						BC048945,AK029072,AK220268,AK163432,AK030482,AK030720,NM_178765,BC065045,AB232449,NM_176998,NM_001032727,AB232448,AB232447	AK029072				1804	0	0	1804	0	1	0	0			2								277.749	0.154				0.0331108	-127.656	TCONS_00010261	XLOC_007898
AK013659	ncRNA	TRUE	AK145993	-210							AK009402,AK079299,AK082783,AK144184,AK145993,AK167233,AK208595,AK213606,BC021451,BC051067,NM_028840	1075	0	0	1075	0	1	0	0			2		1	1					16.333	0.015			-1.02082	0.0113203		TCONS_00017327	XLOC_013391
AK013671	ncRNA						AY940478,DQ065607,NM_001013411,EF058049,EF058050,EF058051,BC141063,NM_001025286,DQ065606	AY940478				813	0	0	813	0	1	0	0			3								61.118	0.075			-1.16896	0.0431263		TCONS_00002858	XLOC_002300
AK013680	ncRNA		AK019965	-94								550	0	5059	5609	2	0.098	0	3.636					1	1	uc007ici.1		AK013680	Mus musculus adult male hippocampus cDNA, RIKEN full-length enriched library, clone:2900053O20 product:unclassifiable, full insert sequence.	0.186	0			-1.01046	0.0477446		TCONS_00003495	XLOC_002822
AK013682	ncRNA						BC152933,NM_001024624,AK139220,BC038161	AK139220				1359	0	0	1359	0	1	0	0	2		2								1077.79	0.793			-1.16635	0.0171573		TCONS_00029958	XLOC_023249
AK013683	ncRNA						AK017578,BC047146,AB093249,BC079893,NM_177284,NM_020252	NM_020252				876	0	0	876	0	1	0	0			1								40.63	0.046			-0.239073	0.0186616		TCONS_00012878	XLOC_009985
AK013702	ncRNA								AK220465			678	0	0	678	0	1	0	0											124.119	0.183			-0.900253	0.155609	-1.9401	TCONS_00004656	XLOC_003738
AK013703	ncRNA								AK080986			702	0	0	702	0	1	0	0			1								148.271	0.211			-0.984286	0.148051	-387.3	TCONS_00021915	XLOC_017104
AK013704	ncRNA	TRUE										917	0	0	917	0	1	0	0			1		1	1					30.216	0.033			-0.832834	0.0553692	-39.4763	TCONS_00009813	XLOC_007526
AK013706	ncRNA									AK032906		502	0	0	502	0	1	0	0											17.214	0.034			-1.13526	0.0492125		TCONS_00029944	XLOC_023236
AK013735	ncRNA						NM_001013802,AK134694	AK134694				1328	0	0	1328	0	1	0	0			3								203.358	0.153			-1.26861	0.0475029		TCONS_00015805	XLOC_012205
AK013736	ncRNA								NM_182808			800	0	0	801	0	1	0	0					2	1					84.749	0.106			3.88411	0.338324	-186.525	TCONS_00023816	XLOC_018572
AK013743	ncRNA						BC046625,NM_001081567,AK036275,BC038249.2,L35236,NM_009158,AK163206,AK082242,BC026697	AK036275				795	0	0	795	0	1	0	0			5								70.785	0.089			-0.955544	0.0256661	-405.273	TCONS_00021922	XLOC_017111
AK013746	ncRNA						AK036189,NM_001166465,NM_001166464,AK039058,BC158020,AK051191,X92864,BC075625,NM_009262,NM_001166466,NM_001166463,AK049019	AK039058				1229	0	0	1231	0	1	0	0	1		3								51.608	0.042			-0.987097	0.12074		TCONS_00007803	XLOC_006009
AK013747	ncRNA						D38377,AK151229,AK036975,AK039228,NM_009744,BC052315	BC052315				1132	0	0	1132	0	1	0	0			2								512.846	0.453			-1.08195	0.0237884	-35.415	TCONS_00011381	XLOC_008797
AK013749	ncRNA	TRUE										1007	0	0	1008	0	1	0	0	2		4		1	2					128.365	0.127			-1.30133	0.029169	-85.028	TCONS_00020936	XLOC_016286
AK013751	ncRNA	TRUE										1545	0	0	1553	0	1	0	0	1		2			2					145.862	0.094			-1.2819	0.0376338		TCONS_00021690	XLOC_016913
AK013752	ncRNA						BC068249,NM_001172104,NM_028356,AK137486	NM_001172104			AK035036,AK049397,AY611626,NM_178744	1295	0	0	1295	0	1	0	0			2								420.098	0.324			-1.26149	0.129891		TCONS_00006280	XLOC_004958
AK013757	ncRNA						BC115641,BC115640,AK033911,NM_028408,NM_001160212,NM_001160211,AK013789	AK013789				1311	0	0	1311	0	1	0	0	1		3								79.168	0.06			-1.34851	0.0317183		TCONS_00000893	XLOC_000650
AK013762	ncRNA						AK008970,AK008404,NM_025618,AK008783,BC065790,AK168900,AK168572,AK146911,AK168792,AK146071,NM_001080974,AK134747	AK008783				1206	0	0	1206	0	1	0	0			3								95.928	0.08			-1.24223	0.0385599		TCONS_00020522	XLOC_015949
AK013764	ncRNA								AK162358	BC030877		991	0	0	991	0	1	0	0			2								103.031	0.104			-1.17034	0.0380403		TCONS_00019280	XLOC_014896
AK013766	ncRNA						FM872408,BC109157,BC109156,NM_023116,AK034054,AK082315	AK034054				1564	0	0	1565	0	1	0	0			2								116.45	0.074			-1.33992	0.012725	-52.2435	TCONS_00014929	XLOC_011533
AK013767	ncRNA									AK134728		696	0	0	697	0	1	0	0	1		1								125.936	0.181	TRUE		-1.26543	0.0115311	-93.4812	TCONS_00009985	XLOC_007665
AK013768	ncRNA									AK029488		1985	0	0	1994	0	1	0	0	1		2			1					482.796	0.243			-1.03652	0.10106		TCONS_00022958	XLOC_017887
AK013769	ncRNA								AK039128			806	0	3575	4381	1	0.184	0	1.241					1	1					304.323	0.378			-1.30939	0.093115	-60.3051	TCONS_00016641	XLOC_012878
AK013770	ncRNA									AY043305		618	0	0	618	0	1	0	0			1								280.553	0.454				0.100878		TCONS_00019888	XLOC_015408
AK013771	ncRNA	TRUE										1145	0	0	1146	0	1	0	0			1								184.966	0.162			1.72513	0.0375301	-115.781	TCONS_00026820	XLOC_020862
AK013778	ncRNA	TRUE										963	0	0	965	0	1	0	0			2		1	1					75.245	0.078			-1.36968	0.0170073		TCONS_00016170	XLOC_012495
AK013781	ncRNA						D37792,AK164153,NM_009306,BC042519,AK078790,AK133578,BC048187,NM_001252342,NM_001252341,AK018163,AK013798	NM_001252341				549	0	0	549	0	1	0	0											21.589	0.039			-1.1162	0.0580709	-58.4818	TCONS_00003278	XLOC_002641
AK013782	ncRNA						BC043689,AK028537,AK157173,NM_133221,NM_001177595,NM_001177594,AF261233	AF261233				511	0	0	513	0	1	0	0					1	2					8.144	0.016			-0.304496	0.0266826		TCONS_00021186	XLOC_016491
AK013790	ncRNA						NM_008715,BC059263	BC059263	AK053602	AK186108		933	0	0	934	0	1	0	0			1								64.324	0.069				0.0505199		TCONS_00009170	XLOC_007018
AK013795	ncRNA						NM_001177646,AK159617,AF072544,AF072543,AF332079,AB018194,AF332080,BC062197,Y10349,D85785,D87968,D87967,NM_007547,NM_001177647,U89694	AK159617				891	0	0	893	0	1	0	0			1								331.841	0.372			-1.0406	0.0452411		TCONS_00015725	XLOC_012146
AK013797	ncRNA									NM_009206		629	0	0	631	0	1	0	0			1		1	1					23.242	0.037			-1.16547	0.0229125		TCONS_00020692	XLOC_016082
AK013802	ncRNA	TRUE										999	0	0	999	0	1	0	0					1	1					291.715	0.292			-1.14685	0.0158402		TCONS_00002901	XLOC_002335
AK013807	ncRNA	TRUE										777	0	0	777	0	1	0	0			7			1					116.315	0.15			-1.18591	0.0175608		TCONS_00017340	XLOC_013403
AK013808	ncRNA									AK146824		579	0	0	579	0	1	0	0											103.668	0.179			-1.06254	0.0366481		TCONS_00019668	XLOC_015218
AK013809	ncRNA						AK030016,NM_175930,AK029995	AK029995			AK162220	465	0	0	465	0	1	0	0			1								51.445	0.111			-1.31972	0.00235087		TCONS_00005983	XLOC_004714
AK013816	ncRNA	TRUE									AK143444,AK147244,AK147348,AK147419,NM_010437	202	0	0	202	0	1	0	0											149.755	0.741			-1.16195	0.00443997		TCONS_00002023	XLOC_001596
AK013819	ncRNA						AK132586,NM_001164035,BC065785,NM_008742,NM_001164034	BC065785				529	0	0	530	0	1	0	0			1								44.615	0.084			-1.29963	0.0403897		TCONS_00024005	XLOC_018736
AK013822	ncRNA						AB093249,BC079893,NM_177284,NM_020252,AK133271,AK163484,AK037724	NM_020252				1254	0	0	1256	0	1	0	0			3								100.32	0.08			-1.18379	0.030403	-63.8452	TCONS_00012892	XLOC_009997
AK013824	ncRNA						AK042683,AB030836,NM_012028,BC055737,AK038434,AB028840,AK034387	AK034387	AK168666			984	0	0	985	0	1	0	0											40.931	0.042			-0.953198	0.041312	-34.3885	TCONS_00018873	XLOC_014562
AK013826	ncRNA									NM_009088		275	0	0	275	0	1	0	0					1	1					22.457	0.082			-1.17783	0.00685245		TCONS_00022901	XLOC_017840
AK013844	ncRNA	TRUE										753	0	0	753	0	1	0	0			1		2	4					198.073	0.263			-0.978926	0.0164495		TCONS_00000913	XLOC_000665
AK013849	ncRNA		AK006969	-285					AK139692		AK006969,AK009708,AK014323,AK088622,AK153499,BC005579,NM_025699	558	0	0	558	0	1	0	0			1		1						8.609	0.015			-0.743818	0.0669279	-152.245	TCONS_00015924	XLOC_012309
AK013860	ncRNA								BC067048	AK217882		1307	0	0	1307	0	1	0	0			1		1						135.195	0.103				0.0864867	-32.886	TCONS_00012304	XLOC_009568
AK013878	ncRNA	TRUE										567	0	0	567	0	1	0	0											14.1	0.025			-1.11446	0.0521578		TCONS_00010033	XLOC_007708
AK013894	ncRNA		AK159032	-281				AK030267	AK016037		AK078509,AK159032,AK159260,AK168821,AK169089,BC022686,NM_029211	1859	0	0	1872	0	1	0	0			4								223.669	0.12			-1.28668	0.0309905		TCONS_00024667	XLOC_019278
AK013908	ncRNA		BC069965	-328					AK182090	BC144716	AK088529,AK139507,BC069965,NM_001048250	1996	0	0	1997	0	1	0	0			3		1						473.279	0.237			-1.15716	0.0630702	-19.7588	TCONS_00008239	XLOC_006254
AK013917	ncRNA						BC019994,AK173287,BC038938,NM_029640,BC034590,AY630620,AK156739,NM_180662,BC070463	BC038938				1371	0	0	1371	0	1	0	0			3								316.927	0.231			-1.25658	0.044618		TCONS_00010393	XLOC_008014
AK013926	ncRNA	TRUE										664	0	82602	83267	3	0.008	0	4.518	1				1	1					95.648	0.144			-1.11518	0.0208143		TCONS_00025554	XLOC_019944
AK013927	ncRNA						AK050541,AF187014,AK078528,BC014716,NM_019573,EF410109	NM_019573				1469	0	0	1470	0	1	0	0			3								233.8	0.159			-1.01666	0.078361		TCONS_00026288	XLOC_020532
AK013928	ncRNA						AK032826,BC022107,AK146981,NM_007664,M31131,AB008811	AB008811				1990	0	0	1991	0	1	0	0			5								182.502	0.092			-0.847803	0.17118	-49.4788	TCONS_00013500	XLOC_010482
AK013958	ncRNA	TRUE										592	0	0	592	0	1	0	0					1						85.324	0.144			-0.381249	0.0914488	-41.2908	TCONS_00002164	XLOC_001713
AK013968	ncRNA						BC066072,AK164158,BC096021,NM_177047,AK147478	AK147478				713	0	0	713	0	1	0	0			5								499.984	0.701			-1.11165	0.00452532		TCONS_00022158	XLOC_017276
AK013987	ncRNA	TRUE	BC016462	-327							AK155200,AK156323,BC008154,BC016462	1275	0	0	1275	0	1	0	0					1	1					301.243	0.236			-0.900867	0.0638234	-9.2129	TCONS_00013153	XLOC_010206
AK013988	ncRNA				AK198650	566			BC038029	BC043129		1674	0	0	1680	0	1	0	0	2		5								161.81	0.097			-1.09686	0.0252617		TCONS_00022806	XLOC_017767
AK014000	ncRNA						U90665,U90664,BC040218,NM_207654,NM_010109	NM_010109				1574	0	0	1574	0	1	0	0			6								386.309	0.245			-1.33194	0.0301057	-9.2895	TCONS_00012619	XLOC_009817
AK014001	ncRNA		AK032124	-748	AY549883	823					AK032124,AK043771,AK166090,AY044265,BC026680,BC031495,BC069862,NM_145614	1399	0	0	1401	0	1	0	0	1		6								202.648	0.145			-1.10535	0.181463		TCONS_00027503	XLOC_021429
AK014002	ncRNA									AK014369		680	0	0	680	0	1	0	0			2								228.532	0.336			-1.04883	0.0233422		TCONS_00016985	XLOC_013151
AK014028	ncRNA								AK200124			1625	0	4799	6424	2	0.253	0	1.231	1		4				uc007pbg.1		AK014028	Mus musculus 13 days embryo head cDNA, RIKEN full-length enriched library, clone:3110009F21 product:unclassifiable, full insert sequence.	32.452	0.02			0.697933	0.0323498	-58.5892	TCONS_00006504	XLOC_005143
AK014032	ncRNA		AK077914	-203	AK028767	506						1114	0	1873	2987	2	0.373	0	1.795			4		2	1	uc007dlr.1		AK014032	Mus musculus 13 days embryo head cDNA, RIKEN full-length enriched library, clone:3110009H23 product:unclassifiable, full insert sequence.	107.129	0.096			-1.08373	0.0641883		TCONS_00000833	XLOC_000600
AK014034	ncRNA									AK036338		949	0	0	950	0	1	0	0			1		1	1					2.401	0.003			2.2951	0.0140557		TCONS_00025375	XLOC_019794
AK014037	ncRNA						AK013209,AK012930,AK031478,BC072623,NM_001025565,AB221560,AJ243851,NM_010714	NM_001025565				1392	0	0	1392	0	1	0	0			7		1						1238.16	0.889			-1.34383	0.00907182		TCONS_00001636	XLOC_001274
AK014048	ncRNA	TRUE										335	0	0	335	0	1	0	0			1		1						69.327	0.207			-1.06531	0.0175362		TCONS_00012267	XLOC_009538
AK014059	ncRNA	TRUE										734	0	0	734	0	1	0	0	1										20.905	0.028			-1.22596	0.0208687		TCONS_00025175	XLOC_019669
AK014075	ncRNA						AK167246,NM_020575,AK034109,AF155739,AK168555,AK166666,AK143177,BC025029	AK143177				438	0	0	439	0	1	0	0			1								15.872	0.036			-1.07539	0.0515248	-29.4851	TCONS_00015235	XLOC_011773
AK014088	ncRNA						AK032970,AF033116,AK141157,AK122312,BC060699,NM_015753	AK141157				1279	0	0	1279	0	1	0	0	1		9		1	4					486.764	0.381			-1.18965	0.0107157		TCONS_00016388	XLOC_012664
AK014107	ncRNA		AK160956	-41						AK220275	AK032597,AK047411,AK053420,AK084627,AK140534,AK160956,AK165012,BC057962,NM_172711	326	0	0	326	0	1	0	0											3.885	0.012			-1.39863	0.0235174		TCONS_00021790	XLOC_016998
AK014121	ncRNA											1625	0	14946	16576	2	0.098	0	1.231			1			1					110.401	0.068			-1.0238	0.0966205	-3.6496	TCONS_00009843	XLOC_007553
AK014124	ncRNA						AF105268,BC023448,AK132531,AK149312,NM_011821,NM_001079844,AK164668	AK164668				455	0	0	455	0	1	0	0			1								16.631	0.037			-1.06395	0.00709117		TCONS_00008798	XLOC_006716
AK014129	ncRNA						BC053001,AK034376,AK032543,NM_001177618,AF324451,NM_033264,BC128376,AK032417,NM_001177616,BC098368,NM_001177617,AK137974,NM_001177619,AK153892,AK029467,AK050613,NM_001177623	AK032543				377	0	0	377	0	1	0	0											7.894	0.021				0.0141759		TCONS_00028693	XLOC_022427
AK014131	ncRNA		BC062909	-337							AK154521,AY007702,BC062909,NM_001122759	2072	0	0	2076	0	1	0	0			4								190.991	0.092	TRUE		-1.22391	0.0792362		TCONS_00017329	XLOC_013393
AK014136	ncRNA						AK053576,AK053563,AK052416,NM_001122850,AK137690,AK053762,AY026057,NM_033620,BC145508,BC141187,BC090616,AX765738	BC090616				1527	0	0	1528	0	1	0	0			2								46.884	0.031			-1.11828	0.0540369		TCONS_00026530	XLOC_020613
AK014146	ncRNA						BC098461,NM_001163387,NM_138666,AK122433	AK122433				1205	0	0	1206	0	1	0	0			3								62.577	0.052			-1.27361	0.0640318		TCONS_00018079	XLOC_014007
AK014156	ncRNA						AK088850,BC044749,NM_026655,BC052432,AK019097,AK148008	AK148008			AK163875	1829	0	0	1829	0	1	0	0	3		6			1					63.143	0.035			-1.07705	0.00524739		TCONS_00025618	XLOC_019995
AK014159	ncRNA						AK083733,AK046067,NM_177658,BC145260,BC138377	AK083733				486	0	0	486	0	1	0	0			1								54.259	0.112			-1.04027	0.0535757		TCONS_00015906	XLOC_012292
AK014161	ncRNA		NM_172965	-175							AK034401,AK053675,AK084078,BC066030,NM_172965	942	0	0	942	0	1	0	0			2								91.098	0.097			-1.12926	0.0924976		TCONS_00013545	XLOC_010523
AK014172	ncRNA	TRUE										760	0	0	760	0	1	0	0			4		1						41.84	0.055			-0.9473	0.0180706	-189.738	TCONS_00002528	XLOC_002033
AK014176	ncRNA						NM_001253813,NM_175344,BC060732,AK159411,AK089300	AK089300				1332	0	0	1334	0	1	0	0											47.705	0.036			-0.641405	0.146617		TCONS_00010009	XLOC_007688
AK014187	ncRNA		AK005336	-196							AK002732,AK003168,AK005336,AK010651,AK088098,AK143887,AK168017,BC034363,BC092213,BC094054,NM_007808	1445	0	0	1445	0	1	0	0	2		3								50.571	0.035				0.0791963		TCONS_00022741	XLOC_017724
AK014197	ncRNA	TRUE										1239	0	0	1240	0	1	0	0	1		3								111.472	0.09			-1.17618	0.016863		TCONS_00011093	XLOC_008572
AK014217	ncRNA								AK041305		AK003231,AK008291,AK009186,BC059710,NM_025363	1091	0	0	1091	0	1	0	0			3								65.146	0.06			0.124395	0.0113385		TCONS_00023450	XLOC_018280
AK014219	ncRNA								AK147943			248	0	0	248	0	1	0	0			1			1					166.201	0.67			-1.13916	0.0149605		TCONS_00022552	XLOC_017583
AK014225	ncRNA	TRUE										705	0	0	708	0	1	0	0			1			2					167.523	0.238			-1.19542	0.0620914		TCONS_00029176	XLOC_022795
AK014233	ncRNA						AK038878,AK016937,BC067247,BC038377,AK172953,NM_001099637,BC085106	AK038878				1416	0	0	1419	0	1	0	0			6								87.777	0.062			-1.21949	0.0195471		TCONS_00001856	XLOC_001456
AK014238	ncRNA	TRUE										953	0	0	953	0	1	0	0	1		2		1						0.285	0			-0.0434412	0.00219237		TCONS_00029233	XLOC_022844
AK014239	ncRNA						AB060081,NM_001081277,AK053807	AK053807				844	0	0	844	0	1	0	0			1								234.617	0.278			-1.22238	0.00588418		TCONS_00018871	XLOC_014560
AK014258	ncRNA									NM_198298		451	0	0	451	0	1	0	0											31.323	0.069				0.00062762		TCONS_00004131	XLOC_003350
AK014267	ncRNA						BC085318,AK173269,NM_001004176,AB553633	AB553633				995	0	0	995	0	1	0	0			1								41.296	0.042			-1.30834	0.0709377		TCONS_00018326	XLOC_014124
AK014273	ncRNA		AK014778	-54								856	0	3517	4373	1	0.196	0	1.168					1		uc007udw.1		AK014273	Mus musculus 13 days embryo head cDNA, RIKEN full-length enriched library, clone:3110083C13 product:unclassifiable, full insert sequence.	32.155	0.038			-0.901611	0.0968628	-10.0663	TCONS_00008574	XLOC_006539
AK014284	ncRNA				AK139684	906	BC060237,NM_177879,AK147578,AK030635	AK147578				1196	0	0	1197	0	1	0	0											37.418	0.031			-1.3805	0.0697122		TCONS_00021324	XLOC_016604
AK014321	ncRNA						U90665,U90664,BC040218,NM_207654,NM_010109	NM_010109				3337	0	0	3337	0	1	0	0			5								558.367	0.167			-1.11133	0.0960981	-46.0963	TCONS_00012612	XLOC_009810
AK014334	ncRNA						BC014727,AK011504,BC004640,AK009983,AJ299430,AK142720,NM_133784,AK142299,NM_001168281	NM_133784				1987	0	0	1989	0	1	0	0			5								197.094	0.099			-0.0718288	0.098884		TCONS_00018367	XLOC_014159
AK014377	ncRNA										AF072248,BC038264,NM_013595	1031	0	0	1031	0	1	0	0			1		1	1					122.617	0.119			-1.0834	0.0122929		TCONS_00002367	XLOC_001893
AK014378	ncRNA											1044	0	787	1831	1	0.57	0	0.958					1	1	uc009eux.1		AK014378	Mus musculus 17 days embryo head cDNA, RIKEN full-length enriched library, clone:3300002P13 product:hypothetical protein, full insert sequence.	125.71	0.12			-0.786996	0.0406565	-56.9158	TCONS_00024901	XLOC_019465
AK014392	ncRNA						AK142799	AK142799			AK005078,AK075729,AK075735,AK076025,AK078129,AK135444,AK149086,BC015268,BC147249,BC147250,M80840	2710	0	0	2710	0	1	0	0	1		4								684.467	0.253			-0.653634	0.684019		TCONS_00025234	XLOC_019690
AK014404	ncRNA	TRUE										3540	0	0	3540	0	1	0	0			6								1164.98	0.329			-0.947183	0.119404		TCONS_00005235	XLOC_004211
AK014424	ncRNA						AK052632,AK172011,AK045123,AK134022,AF200687,AF453571,AY050663,AF369980,NM_133957,NM_018823,AF162853	AK045123				1017	0	0	1017	0	1	0	0	1		9								263.52	0.259			-1.32001	0.0121261		TCONS_00026232	XLOC_020488
AK014435	ncRNA						NM_018819,AK004013,AF181116,AK014421,BC024365,AK135943,AK002266,AK005348,AK013391,AK002241,BC103767,AK170514	AK170514				364	0	3915	4279	1	0.085	0	2.747							uc008ajj.1		AK014435	Mus musculus 18 days pregnant adult female placenta and extra embryonic tissue cDNA, RIKEN full-length enriched library, clone:3830411I18 product:brain protein 44-like, full insert sequence.	112.875	0.31			-0.0129355	0.0776777		TCONS_00011837	XLOC_009184
AK014451	ncRNA	TRUE										1178	0	0	1179	0	1	0	0			1		1	1									-1.07805	0.0752942		TCONS_00018172	XLOC_014092
AK014465	ncRNA									NM_026640		2525	0	0	2525	0	1	0	0			4		1	1					424.367	0.168			0.287524	0.213954		TCONS_00014047	XLOC_010861
AK014468	ncRNA							NM_009231				2245	0	0	2245	0	1	0	0			15								93.006	0.041				0.0152908		TCONS_00012743	XLOC_009916
AK014495	ncRNA						AK178507,BC055075,AF083339,NM_012017	NM_012017				2544	0	0	2544	0	1	0	0	1		1		1						322.457	0.127			-0.0427227	0.0563976		TCONS_00006952	XLOC_005422
AK014506	ncRNA						X80937,AK159404,NM_001198949,BC075732,BC076636,BC054329,AK145387,NM_009067,AK019116,AK138197,BC028516,AK136116,AK133613	BC054329				1021	0	0	1021	0	1	0	0			1								68.308	0.067			-1.25614	0.0285178		TCONS_00012650	XLOC_009843
AK014513	ncRNA	TRUE										1739	0	825	2564	1	0.678	0	0.575			2		1	1	uc007eem.1		AK014513	Mus musculus 0 day neonate skin cDNA, RIKEN full-length enriched library, clone:4631405K08 product:unclassifiable, full insert sequence.	269.946	0.155			-0.956011	0.0968561	-163.609	TCONS_00001962	XLOC_001549
AK014529	ncRNA	TRUE										1763	0	0	1763	0	1	0	0	2		2		1	1					82.569	0.047			-0.468587	0.00918066		TCONS_00008275	XLOC_006284
AK014550	ncRNA						U91483,BC140959,BC092229,NM_009814,BC137668,AF068244	AF068244				2882	0	0	2882	0	1	0	0			3								320.116	0.111			-0.964168	0.134715	1.485	TCONS_00017716	XLOC_013711
AK014560	ncRNA	TRUE										2756	0	0	2765	0	1	0	0			5								619.004	0.225			-1.11597	0.0564127	-18.9662	TCONS_00021055	XLOC_016384
AK014583	ncRNA											4908	0	0	4908	0	1	0	0	2		1								868.019	0.177			-0.809421	0.141734		TCONS_00004172	XLOC_003388
AK014596	ncRNA	TRUE										2302	0	0	2303	0	1	0	0			3		1						158.438	0.069			-1.07621	0.130946		TCONS_00010859	XLOC_008369
AK014604	ncRNA									AK005765		2439	0	0	2439	0	1	0	0	2				1										0.504413	0.0251639		TCONS_00018036	XLOC_013973
AK014609	ncRNA						AK153298,NM_008991,AK144060,AK004660,BC009119,BC054446,AK198431	BC054446				1071	0	0	1073	0	1	0	0			3								180.065	0.168			-1.28124	0.0516241		TCONS_00018700	XLOC_014426
AK014615	ncRNA		BC065810	298						AK017608		1603	0	0	1604	0	1	0	0			2		1	1					200.976	0.125			-1.12118	0.0183041		TCONS_00004049	XLOC_003279
AK014620	ncRNA								AK144569			1141	0	2035	3176	1	0.359	0	0.876	1		1												-1.31549	0.0423433		TCONS_00006297	XLOC_004970
AK014624	ncRNA									AK220300		2146	0	0	2148	0	1	0	0			3		1	1					141.968	0.066			-1.1221	0.0310004	-127.265	TCONS_00009748	XLOC_007495
AK014628	ncRNA						AK156989,BC019437,AK075769,AK077648,NM_020587,BC040812,BC026944	NM_020587				1510	0	0	1515	0	1	0	0			3								31.792	0.021				0.0554512	-91.0111	TCONS_00019550	XLOC_015118
AK014629	ncRNA		NM_172596	-109							AK011880,AK036519,AK122199,BC040370,NM_001168273,NM_172596	1569	0	0	1571	0	1	0	0			4		1						203.73	0.13			-0.41552	0.043416	-43.0004	TCONS_00008907	XLOC_006811
AK014643	ncRNA		AK219472	152	AK189508	670			AK028273	AK013380		957	0	0	957	0	1	0	0						1					215.821	0.226			-0.487224	0.11204	65.1834	TCONS_00023997	XLOC_018729
AK014650	ncRNA						AK008707,AK147009,NM_029931,AK019458,AF333960,NM_027326,BC021420	AK019458				1599	0	0	1599	0	1	0	0			6								248.213	0.155			-1.16698	0.00883294		TCONS_00020099	XLOC_015599
AK014654	ncRNA								NM_001162950		AF060194,BC120587,NM_016868	905	0	0	905	0	1	0	0					2	2					81.16	0.09			-1.41609	0.00801816		TCONS_00024198	XLOC_018902
AK014656	ncRNA	TRUE										2145	0	106	2251	1	0.953	0	0.466	1										260.769	0.122			0.741724	0.0848422		TCONS_00006083	XLOC_004802
AK014657	ncRNA						AK032132,NM_001111026,AK142006,NM_001111027,X79989,BC139200,BC139201,NM_009822,D32007,AB221624	AK142006				969	0	0	969	0	1	0	0	1		5			1					18.306	0.019			-1.16969	0.0128582		TCONS_00018957	XLOC_014625
AK014658	ncRNA						AF536978,NM_011056,BC132109,BC132107,AK081013,AF038896,EU489880	NM_011056				1807	0	0	1807	0	1	0	0			3								42.347	0.023			-1.15555	0.0433917		TCONS_00007402	XLOC_005691
AK014660	ncRNA		M70642	217								1635	0	4873	6508	3	0.251	0	1.835			1		1		uc007eqv.1		AK014660	Mus musculus 0 day neonate head cDNA, RIKEN full-length enriched library, clone:4833407D20 product:connective tissue growth factor, full insert sequence.	480.282	0.294			-0.995916	0.104786	-130.521	TCONS_00002817	XLOC_002264
AK014661	ncRNA	TRUE							NR_028427			1486	0	608	2099	1	0.71	0	0.673			1								107.137	0.072	TRUE		-1.18937	0.0283928		TCONS_00014283	XLOC_011044
AK014666	ncRNA	TRUE										2120	0	0	2121	0	1	0	0			5		1						35.268	0.017			-1.27112	0.0386147		TCONS_00017324	XLOC_013388
AK014684	ncRNA						AK044929,AY659952,AY659951,DQ017388,AF387322,AF229055,BC002124,NM_001110830,NM_001110829,NM_001110828,DQ017389,BC027263,AK077594,NM_175387,NM_053104,NM_001110827,AY904025,AK139555,AY659953	DQ017389				2071	0	0	2071	0	1	0	0			2								112.819	0.054			-1.13189	0.0219287	-72.6594	TCONS_00010447	XLOC_008049
AK014685	ncRNA						BC171955,BC145282,BC138445,AY309076,AY455867,NM_198703,NM_001199084,NM_001199083,NM_001185021,NM_001185020,AK172935,AK133738,BC055788,AK160909	NM_001185020	BC038700			1805	0	0	1810	0	1	0	0			6								262.676	0.146			-1.16308	0.0125778		TCONS_00023974	XLOC_018707
AK014687	ncRNA						AK012154,AK167945,AF123263,AK010271,AK076607,AK168923,BC016428,BC002313,NM_011811,AK169621,AK165645,AK045432,AK134799,AK217307	AK012154				1479	0	0	1479	0	1	0	0	1		2								70.532	0.048			-1.32326	0.0100929		TCONS_00001382	XLOC_001057
AK014689	ncRNA								BC090845	BC019449		1944	0	0	1944	0	1	0	0	1		9		1	1					585.394	0.301			0.162989	0.0431729		TCONS_00021424	XLOC_016686
AK014692	ncRNA	TRUE										840	0	0	840	0	1	0	0			2		1						81.687	0.097			-1.15122	0.0112258		TCONS_00000542	XLOC_000462
AK014704	ncRNA									NM_028964		971	0	800	1771	1	0.548	0	1.03			1		1		uc007yfl.1		AK014704	Mus musculus 0 day neonate head cDNA, RIKEN full-length enriched library, clone:4833415N18 product:unclassifiable, full insert sequence.	156.645	0.161			-1.06982	0.046743	-66.7523	TCONS_00010735	XLOC_008277
AK014707	ncRNA									AK036952		899	0	0	899	0	1	0	0					1	3					83.544	0.093			-1.08961	0.00904225		TCONS_00002818	XLOC_002265
AK014715	ncRNA						BC061026,BC051548,NM_028063,AK005541,AY349617,AK044059,AK043532	AK043532				1127	0	0	1128	0	1	0	0			4								131.834	0.117			-0.171699	0.0889302		TCONS_00009954	XLOC_007642
AK014719	ncRNA		NM_028639	-106								1370	0	1152	2522	1	0.543	0	0.73			1		1	1					201.674	0.147	TRUE		-1.20015	0.0690402	-7.6842	TCONS_00012856	XLOC_009967
AK014721	ncRNA						AK170659,BC087899,AK170072,AK075745,AK089507,AB088358,AY145896,AK170405,NM_175406,AY517482,AK137586,AK170578	AK170578				1003	0	0	1003	0	1	0	0					1						52.215	0.052			-1.22605	0.0144118		TCONS_00019786	XLOC_015323
AK014724	ncRNA									AK049249		1449	0	0	1449	0	1	0	0			2		1	2					98.474	0.068			0.107839	0.0658916		TCONS_00004570	XLOC_003681
AK014727	ncRNA								AK045522			1575	0	0	1577	0	1	0	0			1		1						415.448	0.264			2.77817	0.0579942	-18.0264	TCONS_00013857	XLOC_010747
AK014730	ncRNA	TRUE										1064	0	2030	3094	1	0.344	0	0.94					1	1					78.911	0.074				0.0313099		TCONS_00011365	XLOC_008781
AK014733	ncRNA						BC131662,AK139338,AY974091,AY149907,AY147848,NM_144860,AY245539	AK139338				1105	0	0	1105	0	1	0	0			1		1	1					92.434	0.084			-1.0682	0.0130184	-109.153	TCONS_00012956	XLOC_010056
AK014738	ncRNA						AK155220,NM_001081014,NM_184088	AK155220				1314	0	0	1314	0	1	0	0			9												-1.33255	0.0325605		TCONS_00019251	XLOC_014872
AK014745	ncRNA						NM_177646	NM_177646				844	0	0	844	0	1	0	0			1			1					81.25	0.096			-1.0467	0.115067	-76.9068	TCONS_00000386	XLOC_000330
AK014748	ncRNA						NM_001163013,BC171951,BC138263,BC072654,BC037178,BC040772	BC138263				1357	0	0	1357	0	1	0	0	1		6								42.363	0.031			-0.365693	0.020694		TCONS_00013174	XLOC_010223
AK014752	ncRNA	TRUE										2478	0	3249	5727	2	0.433	0	0.807			2		1		uc007xkb.1		AK014752	Mus musculus 0 day neonate head cDNA, RIKEN full-length enriched library, clone:4833422M21 product:unclassifiable, full insert sequence.	169.962	0.069			-1.13415	0.110041		TCONS_00010595	XLOC_008168
AK014756	ncRNA						BC096026,AK084124,NM_145933,BC092222,NM_001252505,D16106,NM_001252506	BC092222				1087	0	0	1088	0	1	0	0			2								17.878	0.016			-1.025	0.0271762	-83.7476	TCONS_00010815	XLOC_008337
AK014762	ncRNA							AK014581				1943	0	0	1943	0	1	0	0			1								138.473	0.071			-1.087	0.128502	9.0071	TCONS_00014768	XLOC_011409
AK014787	ncRNA						BC052005,AF102547,AF090437,AF090436,AF129510,BC145440,BC141130,AJ005669,AK047409,BC078644,AK053594,BC059934,NM_007826,NM_001038610,AK139060	BC052005				2021	0	0	2021	0	1	0	0			5								446.892	0.221			-0.201284	0.0347121		TCONS_00009399	XLOC_007206
AK014796	ncRNA						AK090059,AK089490	AK090059		AK089490		1641	0	0	1646	0	1	0	0	1										132.272	0.081			-0.770035	0.0273699	16.8809	TCONS_00025717	XLOC_020071
AK014806	ncRNA		NM_001170746	-877								754	0	22120	22874	2	0.033	0	2.653			2		1	1					236.688	0.314			-0.337691	0.0296747		TCONS_00021490	XLOC_016742
AK014814	ncRNA	TRUE										1273	0	0	1273	0	1	0	0			2								161.857	0.127			-1.221	0.0234066		TCONS_00009246	XLOC_007083
AK014816	ncRNA		NM_133889	-154						AK005983	AK037201,AK084857,AK144053,BC021480,BC049111,NM_133889	1351	0	0	1351	0	1	0	0			2		1						39.776	0.029			-0.112639	0.0285992		TCONS_00020312	XLOC_015774
AK014826	ncRNA		NM_001163064	275							AK137251,NM_001163064	1609	0	0	1612	0	1	0	0			2								371.366	0.231	TRUE		-1.11949	0.237316		TCONS_00003127	XLOC_002523
AK014830	ncRNA		BC005495	-18	AK078060	910				AK018339		2947	0	0	2947	0	1	0	0			2		3	4					859.694	0.292			-0.676871	0.252706		TCONS_00016633	XLOC_012870
AK014833	ncRNA	TRUE										1727	0	0	1732	0	1	0	0			2								131.347	0.076			-1.19381	0.0256432	-50.8981	TCONS_00024318	XLOC_018997
AK014847	ncRNA								AY083458			1023	0	0	1026	0	1	0	0			1		1						79.738	0.078			-1.23744	0.055298	-3.7279	TCONS_00028500	XLOC_022262
AK014857	ncRNA	TRUE										923	0	14626	15549	6	0.059	0	6.501							uc009vhn.1		AK014857	Mus musculus adult male testis cDNA, RIKEN full-length enriched library, clone:4921509O09 product:unclassifiable, full insert sequence.	19.94	0.022			1.10916	0.00438273		TCONS_00030096	XLOC_023305
AK014867	ncRNA	TRUE										827	0	0	827	0	1	0	0			4								142.264	0.172			-1.27858	0.0132356		TCONS_00000051	XLOC_000047
AK014868	ncRNA									BC003349		1979	0	0	1979	0	1	0	0			12		3	2					525.143	0.265			-0.354365	0.0410407		TCONS_00029950	XLOC_023242
AK014883	ncRNA								NM_008746			1096	0	260	1356	1	0.808	0	0.912			5		1						26.72	0.024			-1.01253	0.0639989		TCONS_00024471	XLOC_019126
AK014898	ncRNA	TRUE										1105	0	9748	10853	2	0.102	0	1.81			3		1	1					6.109	0.006			0.239788	0.0138886		TCONS_00010151	XLOC_007802
AK014899	ncRNA											1423	0	3269	4695	2	0.304	0	1.405			2		1	1					228.169	0.16			-1.41829	0.0662812		TCONS_00010215	XLOC_007856
AK014901	ncRNA		AK132809	-65					AK137160			1536	0	76	1613	1	0.953	0	0.651			3		1	1					64.885	0.042				0.0345583	-45.4433	TCONS_00002417	XLOC_001934
AK014902	ncRNA		NM_020287	271					BC169240	AB032400	NM_020287	1969	0	0	1969	0	1	0	0	1		1		1	1					324.869	0.165			-0.988195	0.0348182	-82.4016	TCONS_00006182	XLOC_004881
AK014907	ncRNA								AK019979			2040	0	1442	3482	1	0.586	0	0.49			5		1						232.383	0.114			0.515974	0.12144		TCONS_00011065	XLOC_008547
AK014914	ncRNA	TRUE	AK014977	-93							AK014977,AK029534,NM_027616	1733	0	0	1736	0	1	0	0			4								158.698	0.092			-1.17371	0.0601064	-52.077	TCONS_00012996	XLOC_010087
AK014916	ncRNA											1702	0	0	1704	0	1	0	0	1				1						75.413	0.044			-1.28407	0.0457874	-27.2586	TCONS_00028272	XLOC_022068
AK014921	ncRNA								BC072572	AK036994		1703	0	5901	7613	7	0.225	0	4.11											411.93	0.242				0.193429	53.8788	TCONS_00010041	XLOC_007713
AK014924	ncRNA	TRUE										1797	0	0	1816	0	1	0	0					2	1					151.742	0.084			-1.02602	0.135514		TCONS_00002921	XLOC_002351
AK014928	ncRNA		L10427	-777					BC152918		AB221612,BC146323,BC148751,L10427,NM_007959	1784	0	0	1784	0	1	0	0	1		6								298.496	0.167			-1.05376	0.0336554		TCONS_00024274	XLOC_018963
AK014930	ncRNA		NM_013863	-434							AB041583,AF130471,AK007414,AK016510,AK036675,AK171734,BC145765,NM_013863	586	0	0	586	0	1	0	0					2						27.018	0.046			-1.19344	0.0262776		TCONS_00025603	XLOC_019982
AK014935	ncRNA		NM_173015	-18							AK030288,AK157390,AK173047,BC062639,BC087539,BC156430,BC172660,NM_001048143,NM_173015	1845	0	0	1847	0	1	0	0			3		1						141.693	0.077			-1.19217	0.0972804	5.7695	TCONS_00027179	XLOC_021160
AK014936	ncRNA	TRUE										1924	0	2470	4395	1	0.438	0	0.52	3		3		1	1					174.544	0.091			-1.03023	0.0432556	-20.7785	TCONS_00017786	XLOC_013765
AK014941	ncRNA	TRUE										735	0	5474	6210	1	0.119	0	1.361			3		1	1					28.622	0.039				0.0228581		TCONS_00008883	XLOC_006789
AK014943	ncRNA									AK158158		1130	0	3472	4602	1	0.246	0	0.885			8								57.118	0.051			-0.991238	0.0227541		TCONS_00024899	XLOC_019463
AK014951	ncRNA		AK006216	-110								1060	0	2787	3847	1	0.276	0	0.943							uc009rnw.1		AK014951	Mus musculus adult male testis cDNA, RIKEN full-length enriched library, clone:4921523L03 product:unclassifiable, full insert sequence.	117.158	0.111				0.185289		TCONS_00028666	XLOC_022399
AK014953	ncRNA	TRUE										1134	0	0	1134	0	1	0	0			3		2	2					120.548	0.106			-0.997841	0.0753127		TCONS_00021924	XLOC_017113
AK014957	ncRNA	TRUE										1631	0	58653	60284	8	0.027	0	4.905			5				uc007vqo.1		AK014957	Mus musculus adult male testis cDNA, RIKEN full-length enriched library, clone:4921524H24 product:unclassifiable, full insert sequence.	78.973	0.048			-1.08358	0.0273579		TCONS_00010265	XLOC_007902
AK014962	ncRNA		NM_026330	-12					AK050668			1374	0	130	1504	1	0.914	0	0.728			3		1	2					207.209	0.151			-1.11693	0.0200626		TCONS_00024778	XLOC_019371
AK014964	ncRNA								AK036190			3101	0	3359	6460	2	0.48	0	0.645			3		1	1	uc007uwu.1		AK014964	Mus musculus adult male testis cDNA, RIKEN full-length enriched library, clone:4921525B02 product:unclassifiable, full insert sequence.	269.052	0.087			-1.16295	0.0229198		TCONS_00009427	XLOC_007229
AK014965	ncRNA	TRUE										3027	0	0	3028	0	1	0	0	1		10								44.112	0.015			-1.10319	0.0568306		TCONS_00001496	XLOC_001156
AK014973	ncRNA									AK132965		1663	0	0	1673	0	1	0	0			1		2	2									0.197585	0.00331631		TCONS_00018725	XLOC_014443
AK014992	ncRNA	TRUE										1354	0	12337	13691	4	0.099	0	2.954							uc008fuk.1		AK014992	Mus musculus adult male testis cDNA, RIKEN full-length enriched library, clone:1700108N05 product:inferred: RIKEN cDNA 4921531P14 gene, full insert sequence.	24.651	0.018			-1.21156	0.0543723	-29.216	TCONS_00013904	XLOC_010787
AK014993	ncRNA		AF421879	120							AF321817,AF421879,AK012057,BC065781,BC115636,BC115637,NM_028228	1813	0	0	1813	0	1	0	0			2		1	1					82.747	0.046			-1.134	0.0946882	-89.2544	TCONS_00009181	XLOC_007026
AK014999	ncRNA								BC063058			1392	0	958	2350	1	0.592	0	0.718			1		1	1	uc009rdf.1		AK014999	Mus musculus adult male testis cDNA, RIKEN full-length enriched library, clone:4921534H16 product:unclassifiable, full insert sequence.	49.038	0.035			-1.05153	0.00483979		TCONS_00027810	XLOC_021692
AK015026	ncRNA	TRUE										746	0	15736	16482	3	0.045	0	4.021			1		2	4					159.595	0.214			-0.92917	0.120192		TCONS_00002442	XLOC_001958
AK015028	ncRNA		BC107273	32							AB210841,AK012307,BC026820,BC107273,BC107274,NM_019501	1206	0	0	1211	0	1	0	0			1		1	1					140.593	0.117			1.89369	0.0069801		TCONS_00016217	XLOC_012533
AK015030	ncRNA	TRUE										1089	0	0	1089	0	1	0	0					1	1					31.754	0.029			-0.975763	0.116932		TCONS_00015360	XLOC_011872
AK015031	ncRNA	TRUE										458	0	0	458	0	1	0	0			2			1					10.314	0.023				0.156272	62.3413	TCONS_00005073	XLOC_004095
AK015033	ncRNA		AK191128	135							AK002634,AK004946,AK030299,AK133501,AK137109,AK145965,AK159791,AK161587,AK165958,AK167856,AK191128,AK191196,AK204261,BC052727,BC057343,D11089,D17556,L06896,NM_010481	1880	0	0	1883	0	1	0	0			1		1	2					378.109	0.201			2.2964	0.0771224		TCONS_00013090	XLOC_010161
AK015035	ncRNA	TRUE										637	0	787	1424	1	0.447	0	1.57			2								120.528	0.189			-1.03442	0.0126698		TCONS_00022046	XLOC_017187
AK015042	ncRNA	TRUE										661	0	1594	2255	1	0.293	0	1.513					1	1					101.888	0.154			-0.881183	0.0524264	-31.8775	TCONS_00018406	XLOC_014188
AK015044	ncRNA									NM_178404		1424	0	0	1435	0	1	0	0			2								197.206	0.138			-1.08117	0.329453	108.403	TCONS_00015709	XLOC_012138
AK015045	ncRNA	TRUE										533	0	2214	2747	2	0.194	0	3.752							uc007vyc.1		AK015045	Mus musculus adult male testis cDNA, RIKEN full-length enriched library, clone:4930402D18 product:unclassifiable, full insert sequence.	19.744	0.037			-0.929407	0.148258	-60.0708	TCONS_00009773	XLOC_007519
AK015054	ncRNA								BC062889			806	0	0	806	0	1	0	0			1		1						38.647	0.048			-1.18244	0.0448737		TCONS_00015653	XLOC_012091
AK015055	ncRNA						BC120893,NM_001081037,BC120892,NM_001242411,AK138257	NM_001242411				819	0	0	819	0	1	0	0					1	1					66.405	0.081			-1.22063	0.0279432		TCONS_00003384	XLOC_002733
AK015066	ncRNA	TRUE										1664	0	0	1664	0	1	0	0					3	2					107.22	0.064			-1.04059	0.0401196	-80.1398	TCONS_00003053	XLOC_002461
AK015069	ncRNA						AK049910,BC130267,AF190639,AJ251859,AK035385,NM_013875,AK020137	AK049910				1137	0	1700	2838	1	0.401	0	0.88			1		1	2					349.855	0.308			-0.170163	0.0200062		TCONS_00002790	XLOC_002242
AK015070	ncRNA	TRUE										1250	0	0	1252	0	1	0	0	1		5			1					194.478	0.156			-1.22371	0.00850806		TCONS_00011190	XLOC_008630
AK015071	ncRNA									AK150170		714	0	0	714	0	1	0	0											61.864	0.087				0.0355275		TCONS_00000103	XLOC_000096
AK015076	ncRNA									AF069744		1411	0	0	1418	0	1	0	0			1								115.56	0.082			-1.19962	0.197982		TCONS_00021131	XLOC_016444
AK015082	ncRNA						AK088963.4	AK088963.4		AK088963.4		494	0	1555	2049	1	0.241	0	2.024											31.965	0.065			-1.01973	0.0379679	-31.6175	TCONS_00024077	XLOC_018795
AK015084	ncRNA	TRUE							AK090117.1			1517	0	15088	16605	1	0.091	0	0.659			8								138.534	0.091			-1.17259	0.0337225		TCONS_00006023	XLOC_004746
AK015085	ncRNA						BC117529,BC118035,AB024567,NM_015820	NM_015820				743	0	17854	18597	1	0.04	0	1.346			3		1	2					280.981	0.378			-1.25171	0.0955993		TCONS_00008824	XLOC_006739
AK015089	ncRNA	TRUE										857	0	11621	12478	1	0.069	0	1.167			1		1	1					15.715	0.018			-1.14131	0.0402727		TCONS_00009518	XLOC_007302
AK015090	ncRNA								AK132516	AK032120	AK161781	604	0	0	604	0	1	0	0						1					177.545	0.294			-1.26968	0.0725015		TCONS_00005000	XLOC_004029
AK015091	ncRNA		AB349811.25	345					AK007175			938	0	10837	11775	2	0.08	0	2.132	1		2		1	1					512.48	0.546				0.0357872	-315.004	TCONS_00008921	XLOC_006820
AK015093	ncRNA	TRUE										1015	0	141737	142752	5	0.007	0	4.926			4		1						83.361	0.082			-0.952424	0.0458277		TCONS_00011055	XLOC_008537
AK015094	ncRNA	TRUE										628	0	11205	11833	1	0.053	0	1.592							uc007kxe.1		AK015094	Mus musculus adult male testis cDNA, RIKEN full-length enriched library, clone:4930405D11 product:unclassifiable, full insert sequence.	68.3	0.109			-1.0759	0.0164514		TCONS_00003975	XLOC_003225
AK015095	ncRNA		NM_026083	-121								1682	0	42	1724	1	0.976	0	0.595			2								174.83	0.104			-0.764741	0.0841249		TCONS_00009285	XLOC_007115
AK015096	ncRNA		U86137	179								2650	0	5990	8640	3	0.307	0	1.132			5				uc007tlv.1		AK015096	Mus musculus adult male testis cDNA, RIKEN full-length enriched library, clone:4930405F09 product:telomerase associated protein 1, full insert sequence.	45.194	0.017			0.828391	0.144825		TCONS_00008521	XLOC_006496
AK015097	ncRNA								BC039209			1060	0	0	1060	0	1	0	0			2			1					116.996	0.11			-0.969191	0.0239678		TCONS_00025280	XLOC_019722
AK015098	ncRNA								AK048739			791	0	436	1227	1	0.645	0	1.264			4		1	1					24.422	0.031			-1.03528	0.0555011		TCONS_00021005	XLOC_016343
AK015101	ncRNA	TRUE										1252	0	0	1253	0	1	0	0			1		1	1					63.939	0.051	TRUE			0.215175		TCONS_00022036	XLOC_017179
AK015104	ncRNA						AB098741,AK021387,NM_001005341,BC121190	BC121190	AK086320			1332	0	0	1336	0	1	0	0			1								206.424	0.155			-1.19522	0.0230917		TCONS_00004868	XLOC_003918
AK015106	ncRNA		AK202459	26						AK142477	AK080881,AK154626,AK155195,AK159771,AK170437,AK171534,BC026802,BC054422,NM_145929	742	0	0	743	0	1	0	0					1						252.851	0.341			-1.2298	0.0167385		TCONS_00010466	XLOC_008066
AK015108	ncRNA						AK133969,BC029761,AK166418,NM_146081,NM_001114131,AK167713	AK167713			AK133969,AK166418,AK167713,BC029761,NM_001114131,NM_146081	496	0	0	497	0	1	0	0					1						10.778	0.022			-1.22419	0.14905		TCONS_00012161	XLOC_009441
AK015112	ncRNA		AK015371	-54								1436	0	389	1825	1	0.787	0	0.696			3		1	2					106.866	0.074			-1.05002	0.072976		TCONS_00018648	XLOC_014392
AK015118	ncRNA	TRUE										707	0	59571	60278	2	0.012	0	2.829			2				uc008osz.1		AK015118	Mus musculus adult male testis cDNA, RIKEN full-length enriched library, clone:4930412E21 product:unclassifiable, full insert sequence.	36.193	0.051			1.51647	0.0346492	-77.2449	TCONS_00017339	XLOC_013402
AK015119	ncRNA		AJ251067	-132								1017	0	45555	46572	2	0.022	0	1.967						1					54.724	0.054			-1.15462	0.0352663	5.3886	TCONS_00022554	XLOC_017585
AK015121	ncRNA		BC167233	312			AK086049	AK086049		AK086049		857	0	0	857	0	1	0	0					1						314.859	0.367				0.00928212		TCONS_00024415	XLOC_019079
AK015122	ncRNA	TRUE										1234	0	11255	12496	7	0.099	0	5.673					2	1					91.17	0.074			-0.933977	0.135816		TCONS_00019934	XLOC_015450
AK015123	ncRNA										AK006318,AK032966,AK160132,AK168085,BC034701,BC093523,NM_025600	856	0	0	856	0	1	0	0			3			1									-0.156588	0.0215763		TCONS_00026941	XLOC_020972
AK015128	ncRNA	TRUE										500	0	0	501	0	1	0	0			1								51.852	0.104			-1.06412	0.0782148	-66.7612	TCONS_00025814	XLOC_020154
AK015130	ncRNA		NM_011247	-535							AK045635,AK081261,BC025874,NM_011247,NM_175023	947	0	0	971	0	1	0	0			3		2	5					249.509	0.263			-0.375446	0.0730066	-0.0134	TCONS_00025548	XLOC_019939
AK015131	ncRNA	TRUE										767	0	13590	14357	7	0.053	0	9.126			1		1	1					148.608	0.194				0.359557	54.3051	TCONS_00010020	XLOC_007698
AK015134	ncRNA										BC087947,NM_001013382	1994	0	0	1995	0	1	0	0			3		1	1					820.736	0.412			-0.990393	0.217757	6.9382	TCONS_00000831	XLOC_000599
AK015137	ncRNA						AK132263,AK148428,BC043296,BC096618,AK052045,AK042154,BC090644,NM_177345	AK132263				811	0	0	815	0	1	0	0			2			1					72.687	0.09			-1.06075	0.0174574		TCONS_00015085	XLOC_011649
AK015140	ncRNA				AJ300831	-39						867	0	3607	4478	1	0.195	0	1.153					1	1					44.18	0.051			-1.01783	0.0853233		TCONS_00011769	XLOC_009127
AK015143	ncRNA								AK160789			537	0	28661	29198	1	0.018	0	1.862											3.95	0.007			-1.2018	0.0246205		TCONS_00007813	XLOC_006017
AK015147	ncRNA											1611	0	32372	33983	2	0.047	0	1.241			1		1						177.601	0.11			1.03103	0.12264		TCONS_00008563	XLOC_006528
AK015148	ncRNA	TRUE										912	0	0	912	0	1	0	0			4		2	2					15.895	0.017			-0.526256	0.287247	-34.103	TCONS_00004958	XLOC_003998
AK015151	ncRNA						BC148376,NM_144783,M55512,DQ537939	M55512				776	0	0	776	0	1	0	0			1								62.831	0.081			-0.924056	0.0206363	-46.2864	TCONS_00015531	XLOC_012007
AK015154	ncRNA						NM_001081393,BC158097	NM_001081393				1434	0	0	1434	0	1	0	0			1		1	1					99.744	0.07			-0.877311	0.0353315		TCONS_00013460	XLOC_010450
AK015156	ncRNA	TRUE										534	0	0	534	0	1	0	0					1	1					14.602	0.027			-1.13797	0.0807898	-290.077	TCONS_00013654	XLOC_010599
AK015163	ncRNA								AK146100			1028	0	13647	14675	3	0.07	0	2.918					1						15.05	0.015			-0.79292	0.0226265	-205.385	TCONS_00014121	XLOC_010914
AK015169	ncRNA								BC094545			676	0	0	676	0	1	0	0			1								12.056	0.018	TRUE		-1.19311	0.0438512		TCONS_00000141	XLOC_000124
AK015171	ncRNA		AK145389	324								1091	0	0	1092	0	1	0	0	1				1	1					475.36	0.436			4.79328	0.0638153		TCONS_00006518	XLOC_005151
AK015172	ncRNA		DQ103262	394								668	0	849	1517	1	0.44	0	1.497			1		1						74.076	0.111			-1.34069	0.0269995		TCONS_00016042	XLOC_012391
AK015173	ncRNA	TRUE										916	0	0	916	0	1	0	0											160.36	0.175				0.0352915		TCONS_00020739	XLOC_016122
AK015174	ncRNA	TRUE	NM_172765	-808								636	0	220	856	1	0.743	0	1.572					1		uc009orc.1		AK015174	Mus musculus adult male testis cDNA, RIKEN full-length enriched library, clone:4930421P22 product:unclassifiable, full insert sequence.	44.986	0.071			-1.19143	0.0163602		TCONS_00028154	XLOC_021982
AK015175	ncRNA	TRUE										2362	0	3557	5919	1	0.399	0	0.423			5		1						297.378	0.126			-1.27829	0.0112209	-18.9181	TCONS_00027190	XLOC_021170
AK015178	ncRNA	TRUE										869	0	0	869	0	1	0	0					1	1									-1.26051	0.0370609		TCONS_00027262	XLOC_021234
AK015180	ncRNA											1510	0	65597	67107	4	0.023	0	2.649			2		1	1					79.07	0.052			-0.680692	0.181615		TCONS_00003325	XLOC_002681
AK015183	ncRNA									NM_177775		946	0	4721	5667	1	0.167	0	1.057					1	1	uc009rea.1		AK015183	Mus musculus adult male testis cDNA, RIKEN full-length enriched library, clone:4930422M22 product:unclassifiable, full insert sequence.	96.138	0.102				0.0666507		TCONS_00028614	XLOC_022354
AK015184	ncRNA						BC075674,NM_001033472,AK145159	AK145159				1984	0	0	1984	0	1	0	0			5		1						232.045	0.117			-1.04316	0.0153647	-109.255	TCONS_00029281	XLOC_022881
AK015185	ncRNA									AK051859		989	0	0	992	0	1	0	0			1			1					57.705	0.058			-0.953027	0.0166728		TCONS_00003074	XLOC_002478
AK015186	ncRNA								AK139323			1311	0	0	1311	0	1	0	0			4		1						84.77	0.065			-1.3103	0.0262961		TCONS_00006339	XLOC_005005
AK015187	ncRNA		NM_177395	-187							AK053843,AK155677,NM_001174107,NM_177395	1674	0	0	1674	0	1	0	0			2								114.829	0.069			-1.19351	0.0907899		TCONS_00005582	XLOC_004501
AK015188	ncRNA	TRUE										537	0	2124	2661	2	0.202	0	3.724					1		uc007hcv.1		AK015188	Mus musculus adult male testis cDNA, RIKEN full-length enriched library, clone:4930423D24 product:unclassifiable, full insert sequence.	51.612	0.096			-1.14143	0.0648847		TCONS_00002573	XLOC_002068
AK015189	ncRNA				AK034372	-132						1059	0	0	1059	0	1	0	0	1		2								948.632	0.896			-1.19963	0.081012		TCONS_00006175	XLOC_004874
AK015194	ncRNA	TRUE										1183	0	0	1184	0	1	0	0			2		1	1					96.105	0.081			-1.11641	0.0621053	-41.7729	TCONS_00008831	XLOC_006743
AK015201	ncRNA	TRUE										593	0	388	981	1	0.604	0	1.686			1								13.65	0.023			-1.05626	0.045637	-77.6846	TCONS_00008502	XLOC_006479
AK015204	ncRNA	TRUE										802	0	0	802	0	1	0	0			1								142.988	0.178			-0.704219	0.173603	-102.805	TCONS_00008991	XLOC_006877
AK015206	ncRNA		NM_001002012	-521								635	0	261	898	1	0.709	0	1.575					1						9.604	0.015			-1.33802	0.0291014		TCONS_00006282	XLOC_004959
AK015209	ncRNA		NR_038153	-74						BC019405		1988	0	0	1990	0	1	0	0			4		1						324.508	0.163			-1.14262	0.0618182	-46.1948	TCONS_00023754	XLOC_018526
AK015215	ncRNA									NM_001081007		834	0	0	834	0	1	0	0					1	1					66.764	0.08			-1.08593	0.0292378		TCONS_00024272	XLOC_018961
AK015216	ncRNA		AK016600	-115					Y00850		AK016566,AK016600	650	0	0	650	0	1	0	0			2		1	1					60.347	0.093			-1.14253	0.0249582	-63.8707	TCONS_00003666	XLOC_002964
AK015219	ncRNA								BC070461			920	0	60794	61714	8	0.015	0	8.696			2				uc007nko.1		AK015219	Mus musculus adult male testis cDNA, RIKEN full-length enriched library, clone:4930428E07 product:unclassifiable, full insert sequence.	57.831	0.063			-1.18906	0.0486259		TCONS_00006115	XLOC_004828
AK015221	ncRNA	TRUE										1594	0	0	1594	0	1	0	0	1		1		1						433.084	0.272			-0.991628	0.129881	-86.3385	TCONS_00009441	XLOC_007240
AK015224	ncRNA	TRUE										2008	0	127978	129986	3	0.015	0	1.494						1					196.547	0.098			-1.18039	0.022998	-87.1545	TCONS_00022384	XLOC_017454
AK015226	ncRNA						AF303450.2	AF303450.2	BC145221			1290	0	0	1290	0	1	0	0					1	3					210.274	0.163			-1.19276	0.0306174		TCONS_00011487	XLOC_008887
AK015227	ncRNA									AK016429		777	0	6286	7063	1	0.11	0	1.287			1			1	uc007srh.1		AK015227	Mus musculus adult male testis cDNA, RIKEN full-length enriched library, clone:4930428N03 product:unclassifiable, full insert sequence.	55.851	0.072			-1.01652	0.0248512		TCONS_00008408	XLOC_006398
AK015228	ncRNA									BC130219		1693	0	2693	4386	1	0.386	0	0.591			4		1	1					539.4	0.319			-0.879962	0.031529		TCONS_00021955	XLOC_017141
AK015230	ncRNA		AK006349	-154					AK042687		AK006349,AK016063	998	0	0	998	0	1	0	0											46.003	0.046			-1.16708	0.0235295	-75.1923	TCONS_00006913	XLOC_005390
AK015232	ncRNA	TRUE										503	0	97	600	1	0.838	0	1.988			1		1	1					6.832	0.014			-1.07934	0.040257	-305.417	TCONS_00008655	XLOC_006607
AK015234	ncRNA	TRUE										650	0	0	650	0	1	0	0					1	1					47.151	0.073			2.35858	0.160474		TCONS_00019573	XLOC_015137
AK015238	ncRNA	TRUE										483	0	941	1424	1	0.339	0	2.07						1					6.99	0.014				0.400577	26.3418	TCONS_00024444	XLOC_019103
AK015242	ncRNA								BC150740			1164	0	0	1165	0	1	0	0					1	4					30.858	0.027			-1.12234	0.033814	-47.127	TCONS_00019693	XLOC_015239
AK015244	ncRNA	TRUE										1909	0	0	1912	0	1	0	0	1		3		1	1					78.596	0.041			-1.14314	0.0290246		TCONS_00011497	XLOC_008897
AK015246	ncRNA	TRUE			AK090170	2						558	0	140	698	1	0.799	0	1.792			1			1					59.104	0.106			-0.934248	0.0613488	-28.7457	TCONS_00028657	XLOC_022393
AK015249	ncRNA	TRUE										902	0	4524	5426	3	0.166	0	3.326			2								12.189	0.014			-1.24273	0.0253794		TCONS_00019734	XLOC_015278
AK015257	ncRNA	TRUE										943	0	1091	2034	2	0.464	0	2.121			1		1		uc009cda.1		AK015257	Mus musculus adult male testis cDNA, RIKEN full-length enriched library, clone:4930430M16 product:unclassifiable, full insert sequence.	87.012	0.092			0.373164	0.115023		TCONS_00022810	XLOC_017771
AK015266	ncRNA	TRUE							AK139514			1157	0	6975	8132	1	0.142	0	0.864											146.671	0.127			0.787459	0.218315		TCONS_00002937	XLOC_002365
AK015268	ncRNA									AK036517		579	0	0	579	0	1	0	0			2			1					39.36	0.068			-1.28209	0.00571313		TCONS_00018053	XLOC_013988
AK015269	ncRNA	TRUE										541	0	5595	6136	1	0.088	0	1.848											201.222	0.372				0.0216111		TCONS_00006486	XLOC_005128
AK015276	ncRNA	TRUE										615	0	30148	30764	2	0.02	0	3.252											135.3	0.22			-1.21743	0.0258927		TCONS_00018145	XLOC_014068
AK015281	ncRNA	TRUE										713	0	1372	2085	1	0.342	0	1.403					1						42.853	0.06			-1.2853	0.0113298		TCONS_00008687	XLOC_006633
AK015283	ncRNA	TRUE	NM_027968	-330								1613	0	34597	36210	1	0.045	0	0.62			4		1						182.128	0.113			-1.23689	0.0335451		TCONS_00002727	XLOC_002197
AK015284	ncRNA	TRUE										1085	0	114326	115411	4	0.009	0	3.687			2		1		uc009awr.1		AK015284	Mus musculus adult male testis cDNA, RIKEN full-length enriched library, clone:4930428J05 product:unclassifiable, full insert sequence.	307.312	0.283			-1.01396	0.0687578	-123.286	TCONS_00022383	XLOC_017454
AK015285	ncRNA		NM_001033165	-117					AK008359		AK136359,NM_001033165	737	0	0	738	0	1	0	0			3		1						45.485	0.062			-1.09801	0.055697	-83.9979	TCONS_00019975	XLOC_015484
AK015287	ncRNA				AK076789	311						1284	0	1005	2289	1	0.561	0	0.779	1		4								102.635	0.08			-1.18921	0.0371246	11.7618	TCONS_00021940	XLOC_017128
AK015289	ncRNA	TRUE										3085	0	17572	20657	2	0.149	0	0.648	1		5				uc007uwz.1		AK015289	Mus musculus adult male testis cDNA, RIKEN full-length enriched library, clone:4930432J09 product:unclassifiable, full insert sequence.	291.228	0.094				0.054471		TCONS_00009430	XLOC_007232
AK015294	ncRNA		AK132738	-81						AK142576		1608	0	9040	10648	5	0.151	0	3.109			5								137.447	0.085			-0.935336	0.114652	-31.7746	TCONS_00020894	XLOC_016247
AK015295	ncRNA	TRUE										1787	0	0	1788	0	1	0	0			1								129.084	0.072			-1.12337	0.132336	-3.5789	TCONS_00011904	XLOC_009227
AK015296	ncRNA	TRUE										1986	0	1523	3509	1	0.566	0	0.504			3		2	2					229.827	0.116			-1.1082	0.229471		TCONS_00003379	XLOC_002728
AK015300	ncRNA											1626	0	24359	25985	3	0.063	0	1.845			2		1	1					169.851	0.104			-0.143557	0.0626244		TCONS_00006769	XLOC_005274
AK015302	ncRNA	TRUE	AK006348	-66								2311	0	25185	27496	2	0.084	0	0.865			4								212.755	0.092			-0.954101	0.0672183	-39.3315	TCONS_00025537	XLOC_019930
AK015304	ncRNA	TRUE										1386	0	3832	5218	1	0.266	0	0.722			6								69.148	0.05			-1.2779	0.0573667	-74.8873	TCONS_00000916	XLOC_000668
AK015305	ncRNA						AK087732	AK087732				1209	0	0	1209	0	1	0	0	1				2	1					61.562	0.051			-1.09355	0.0258063		TCONS_00014834	XLOC_011451
AK015307	ncRNA		AK016353	-226								1009	0	4815	5835	1	0.175	0	0.991			2		1	1					45.076	0.045			-0.981038	0.0714321	-66.519	TCONS_00000403	XLOC_000345
AK015310	ncRNA											961	0	51359	52321	2	0.018	0	2.081			1		1	1					93.644	0.097			-0.696734	0.0733468	-53.4865	TCONS_00027381	XLOC_021329
AK015322	ncRNA	TRUE										1272	0	13505	14777	5	0.086	0	3.931			2				uc007nfk.1		AK015322	Mus musculus adult male testis cDNA, RIKEN full-length enriched library, clone:4930435E18 product:unclassifiable, full insert sequence.	69.42	0.055			-0.955685	0.0326758		TCONS_00006072	XLOC_004794
AK015323	ncRNA									AK149889		1786	0	34298	36084	3	0.049	0	1.68			1		1	1					49.493	0.028			2.00343	0.0818377		TCONS_00008291	XLOC_006295
AK015324	ncRNA	TRUE										1032	0	64033	65065	5	0.016	0	4.845			2				uc008xiw.1		AK015324	Mus musculus adult male testis cDNA, RIKEN full-length enriched library, clone:4930435H24 product:hypothetical protein, full insert sequence.	70.283	0.068			4.26188	0.170801		TCONS_00021655	XLOC_016880
AK015326	ncRNA								BC082330			1564	0	324	1891	1	0.829	0	0.639			3		2	1					142.768	0.091			-0.757482	0.167462		TCONS_00008803	XLOC_006721
AK015328	ncRNA								BC117535			2127	0	0	2127	0	1	0	0			4		1						32.928	0.015				0.0140627		TCONS_00025747	XLOC_020097
AK015330	ncRNA	TRUE	AY151400	-116								968	0	15150	16118	6	0.06	0	6.198			2		1	1					28.983	0.03			-1.10355	0.0129434		TCONS_00021467	XLOC_016722
AK015332	ncRNA		AK187258	-921					BC045196	NM_021408		1221	0	0	1221	0	1	0	0			1		1						175.568	0.144			-1.11367	0.0132629		TCONS_00000941	XLOC_000690
AK015341	ncRNA		BC049604	-89								1653	0	1123	2776	1	0.595	0	0.605			3				uc007pbz.1		AK015341	Mus musculus adult male testis cDNA, RIKEN full-length enriched library, clone:4921507G05 product:unclassifiable, full insert sequence.	89.648	0.054			-1.10456	0.0556144		TCONS_00005949	XLOC_004682
AK015344	ncRNA		NM_010798	-92							AK008939,AK010691,AK013328,AK152211,BC024895,BC086928,BC100605,L02913,L07607,L10613,NM_010798,Z23048	1356	0	0	1356	0	1	0	0			1		1	1					277.999	0.205			-0.994383	0.0365703	-18.1188	TCONS_00002338	XLOC_001869
AK015353	ncRNA				NM_001160353	970				NM_001101628		1389	0	1244	2637	1	0.528	0	0.72											34.037	0.025			-0.83989	0.0845006	28.3662	TCONS_00027873	XLOC_021747
AK015356	ncRNA								X17507			582	0	476986	477568	5	0.001	0	8.591					1	1					0	0			-1.09217	0.0516068		TCONS_00029385	XLOC_022969
AK015358	ncRNA								BC089015			1782	0	0	1782	0	1	0	0			1								443.224	0.249			-0.949968	0.0671458		TCONS_00026184	XLOC_020452
AK015361	ncRNA	TRUE										1015	0	5872	6887	1	0.147	0	0.985			2		1	1					407.644	0.402			-0.951332	0.0199353	-19.7563	TCONS_00005518	XLOC_004450
AK015363	ncRNA	TRUE										1710	0	12499	14209	5	0.12	0	2.924	1				1		uc008mzn.1		AK015363	Mus musculus adult male testis cDNA, RIKEN full-length enriched library, clone:4930442J19 product:unclassifiable, full insert sequence.	59.097	0.035			-1.16938	0.0695124		TCONS_00015855	XLOC_012248
AK015366	ncRNA	TRUE	AK016139	-300								1655	0	0	1655	0	1	0	0	1		2		1						99.51	0.06			-1.09447	0.0314832	17.6749	TCONS_00011985	XLOC_009290
AK015368	ncRNA								AK189423	AK162841		1226	0	756	1983	1	0.619	0	0.816					1	1					125.115	0.102			-1.0907	0.128847		TCONS_00003754	XLOC_003038
AK015370	ncRNA						AK088963.4	AK088963.4		AK088963.4		1282	0	0	1282	0	1	0	0			2		1						38.864	0.03			-0.700177	0.0457611	-43.8726	TCONS_00024078	XLOC_018796
AK015376	ncRNA				AK156183	349			NM_001081433			633	0	54455	55088	4	0.011	0	6.319			1		1		uc007azt.1		AK015376	Mus musculus adult male testis cDNA, RIKEN full-length enriched library, clone:4930444A19 product:unclassifiable, full insert sequence.	28.981	0.046			-0.802868	0.13853	15.6545	TCONS_00000183	XLOC_000159
AK015377	ncRNA	TRUE										1240	0	369	1609	1	0.771	0	0.806			2		1						48.365	0.039				0.0280837		TCONS_00015814	XLOC_012214
AK015382	ncRNA	TRUE										1767	0	0	1767	0	1	0	0			5		1						154.131	0.087			-0.93918	0.123899	-1.9016	TCONS_00002747	XLOC_002214
AK015386	ncRNA	TRUE										1214	0	0	1215	0	1	0	0											134.288	0.111			-1.06743	0.0552214		TCONS_00004099	XLOC_003322
AK015387	ncRNA								Belgard_TCONS_02246630			1122	0	95421	96544	4	0.012	0	3.565	1		2		1	1					51.135	0.046				0.0525815		TCONS_00016663	XLOC_012897
AK015390	ncRNA	TRUE										1452	0	0	1452	0	1	0	0			3								291.043	0.2			-1.25342	0.0462333	26.3587	TCONS_00023372	XLOC_018214
AK015395	ncRNA	TRUE										889	0	2380	3269	2	0.272	0	2.25			2				uc008fuc.1		AK015395	Mus musculus adult male testis cDNA, RIKEN full-length enriched library, clone:4930445N18 product:unclassifiable, full insert sequence.	65.495	0.074			-1.35544	0.0396958		TCONS_00013419	XLOC_010416
AK015398	ncRNA	TRUE										928	0	0	928	0	1	0	0					1						70.999	0.077			-1.17456	0.078392		TCONS_00024115	XLOC_018830
AK015404	ncRNA								NM_007567	AK154501		1232	0	372	1604	2	0.768	0	1.623							uc009row.1		AK015404	Mus musculus adult male testis cDNA, RIKEN full-length enriched library, clone:4930447F24 product:unclassifiable, full insert sequence.	262.621	0.213			-1.06875	0.0885611	-63.8749	TCONS_00027884	XLOC_021756
AK015405	ncRNA				AK184881	344	L35549	L35549	AK040525	L35549		546	0	0	546	0	1	0	0			2		1	1					11.011	0.02			-1.372	0.020923		TCONS_00023515	XLOC_018332
AK015406	ncRNA		AK039409	-90							AK032692,AK144601,AK150860,AK152747,AK170433,AK172332,BC002067,M31042,M59821,NM_010499	1756	0	0	1756	0	1	0	0			1		1						227.634	0.13			-1.1524	0.0908144		TCONS_00027002	XLOC_021026
AK015411	ncRNA	TRUE										1034	0	519	1553	1	0.666	0	0.967			2		1						47.474	0.046			-0.545661	0.463656		TCONS_00024788	XLOC_019380
AK015414	ncRNA		AK076657	-67						NM_201362		1247	0	1443	2690	1	0.464	0	0.802			2		1						91.508	0.073			-1.08875	0.0102775		TCONS_00013367	XLOC_010373
AK015415	ncRNA	TRUE										1166	0	0	1178	0	1	0	0						2					126.33	0.108			-1.01082	0.123733		TCONS_00026330	XLOC_020570
AK015416	ncRNA	TRUE							AK135600			1782	0	0	1782	0	1	0	0			2								299.591	0.168			1.6578	0.0668129		TCONS_00028257	XLOC_022055
AK015421	ncRNA								AK013352			1956	0	82170	84126	4	0.023	0	2.045			3		1		uc007bfg.1		AK015421	Mus musculus adult male testis cDNA, RIKEN full-length enriched library, clone:4930448K12 product:unclassifiable, full insert sequence.	315.89	0.161			-1.11756	0.0708031		TCONS_00001292	XLOC_000975
AK015422	ncRNA	TRUE										1433	0	0	1433	0	1	0	0	1		4		1	1					24.817	0.017			5.08083	0.394338		TCONS_00019757	XLOC_015299
AK015423	ncRNA		EU192141	-37								570	0	249193	249763	4	0.002	0	7.018					1	1	uc008yfy.1		AK015423	Mus musculus adult male testis cDNA, RIKEN full-length enriched library, clone:4930448L09 product:unclassifiable, full insert sequence.	42.702	0.075			-0.802702	0.214831	-77.7508	TCONS_00021000	XLOC_016338
AK015424	ncRNA								NM_012026			639	0	0	639	0	1	0	0											68.608	0.107			-1.32159	0.0238106		TCONS_00007328	XLOC_005632
AK015425	ncRNA		AK015988	-106					AK170247	AK182156	AK015988,AK052797,BC049142	1670	0	0	1670	0	1	0	0			1								483.822	0.29			-0.979074	0.0496221		TCONS_00014743	XLOC_011387
AK015428	ncRNA	TRUE										1125	0	430	1555	1	0.723	0	0.889					1		uc007vys.1		AK015428	Mus musculus adult male testis cDNA, RIKEN full-length enriched library, clone:4930449C09 product:unclassifiable, full insert sequence.	373.746	0.332			-0.93977	0.0400141		TCONS_00009817	XLOC_007530
AK015432	ncRNA								AK043845			1118	0	161115	162234	1	0.007	0	0.894			2			1					296.468	0.265			3.27161	0.0354812		TCONS_00020762	XLOC_016142
AK015433	ncRNA								BC047991			875	0	0	875	0	1	0	0					1	1					5.522	0.006			-1.0012	0.0639337	-121.091	TCONS_00017222	XLOC_013311
AK015436	ncRNA						AK040510	AK040510		AY255554		636	0	0	636	0	1	0	0			4		1	1					7.484	0.012			-1.18101	0.0273938		TCONS_00016794	XLOC_012991
AK015439	ncRNA						AK049209,AK220496,NM_175306,NM_001161797,BC075672,BC096033	BC096033				635	0	0	635	0	1	0	0			1								86.758	0.137			-0.986641	0.0200686		TCONS_00020343	XLOC_015801
AK015446	ncRNA				AK160434	-47			NM_001113384			1068	0	25	1094	1	0.977	0	0.936	1				2	2					680.327	0.637			-0.9951	0.275197	-420.64	TCONS_00027089	XLOC_021084
AK015448	ncRNA											1109	0	12567	13676	2	0.081	0	1.803											108.03	0.097			-1.0921	0.0238107	-37.0228	TCONS_00004669	XLOC_003749
AK015449	ncRNA	TRUE	Guttman10_novel_lincs_TCONS_00000211	-942					AK146861			783	0	465	1248	1	0.627	0	1.277	1		1		1						50.554	0.065			-1.09371	0.0655192		TCONS_00002982	XLOC_002406
AK015450	ncRNA								NM_001199304			765	0	100	865	1	0.884	0	1.307	1		1		2	3					12.977	0.017			-1.25769	0.0198033		TCONS_00006904	XLOC_005383
AK015453	ncRNA						AK085351,AF325507,AF028009,NM_011104,AK082438,BC165948	AK082438				2213	0	0	2213	0	1	0	0			6		1	1					197.315	0.089			-1.07788	0.0639841		TCONS_00012271	XLOC_009542
AK015455	ncRNA	TRUE										1439	0	2943	4382	2	0.328	0	1.39			3		1	1					36.595	0.025			-1.12481	0.0696656	-49.9699	TCONS_00025746	XLOC_020096
AK015456	ncRNA								AK133186			1228	0	4206	5436	4	0.226	0	3.257											374.756	0.305			0.825928	0.11182		TCONS_00001437	XLOC_001106
AK015472	ncRNA		AK084800	-373						AK153135	AK084800,AK155062,BC054483,NM_183020	1727	0	0	1727	0	1	0	0			3		1	1					260.561	0.151			-1.2715	0.0233013	-65.061	TCONS_00024785	XLOC_019377
AK015474	ncRNA	TRUE										1330	0	0	1330	0	1	0	0			1		3	3					59.073	0.044			-0.949216	0.017748		TCONS_00001197	XLOC_000893
AK015475	ncRNA		AB349811.25	345					AK007175			1001	0	34649	35650	3	0.028	0	2.997							uc007slx.1		AK015475	Mus musculus adult male testis cDNA, RIKEN full-length enriched library, clone:4930405A10 product:hypothetical protein, full insert sequence.	270.683	0.27			-1.14945	0.0555454		TCONS_00008920	XLOC_006820
AK015477	ncRNA		AK051007	-394			AK157931,AK015083,NM_029610,AK009135	AK015083			AK029043,AK155160,BC030335,NM_001163703,NM_173408	1676	0	0	1680	0	1	0	0			4								190.525	0.114				0.0457937	-46.2553	TCONS_00024749	XLOC_019345
AK015479	ncRNA	TRUE										1103	0	0	1104	0	1	0	0	1		3		1	3					62.495	0.057			-1.27919	0.0503355		TCONS_00002627	XLOC_002115
AK015482	ncRNA		AK076898	-142								628	0	731	1359	1	0.462	0	1.592							uc008tlv.1		AK015482	Mus musculus adult male testis cDNA, RIKEN full-length enriched library, clone:4930457A20 product:unclassifiable, full insert sequence.	29.898	0.048			-0.966326	0.0267574		TCONS_00019250	XLOC_014871
AK015485	ncRNA	TRUE										1264	0	5167	6431	1	0.197	0	0.791					2						55.343	0.044			-1.07448	0.0403849	-51.5661	TCONS_00005544	XLOC_004468
AK015487	ncRNA	TRUE										1207	0	21295	22502	2	0.054	0	1.657											50.167	0.042				0.0674992		TCONS_00002477	XLOC_001986
AK015492	ncRNA		AF442820	-168								1278	0	2097	3375	1	0.379	0	0.782			3		1	1	uc007znn.1		AK015492	Mus musculus adult male testis cDNA, RIKEN full-length enriched library, clone:4930461C15 product:unclassifiable, full insert sequence.	110.835	0.087			-1.09271	0.0145443		TCONS_00011575	XLOC_008961
AK015494	ncRNA	TRUE										647	0	720	1367	1	0.473	0	1.546			1								24.388	0.038			-0.785653	0.0217046		TCONS_00013539	XLOC_010518
AK015503	ncRNA									NM_146688		511	0	32960	33475	2	0.015	0	3.914						1					41.728	0.082			-1.31947	0.0329646		TCONS_00014496	XLOC_011183
AK015506	ncRNA				AK031231	487			AK143026			534	0	3235	3769	1	0.142	0	1.873			1								5.258	0.01				0.0642939	-73.5548	TCONS_00010196	XLOC_007840
AK015508	ncRNA								NM_028638			515	0	2685	3200	1	0.161	0	1.942			1		1						9.326	0.018			-1.28308	0.0155574		TCONS_00028723	XLOC_022451
AK015510	ncRNA	TRUE										1444	0	10303	11747	2	0.123	0	1.385			1		1						456.118	0.316			-0.831417	0.0423923		TCONS_00006485	XLOC_005128
AK015514	ncRNA								AK220153			2263	0	1460	3724	1	0.608	0	0.442						1					119.379	0.053			-1.09099	0.106873	0.0912	TCONS_00023761	XLOC_018533
AK015515	ncRNA								NM_027830	AK010210		906	0	0	906	0	1	0	0			2		1	2					88.875	0.098			-1.19016	0.0479673	-169.131	TCONS_00002218	XLOC_001765
AK015517	ncRNA	TRUE										1658	0	0	1676	0	1	0	0	1		2		1	3					246.485	0.149			-1.05336	0.0194204		TCONS_00004100	XLOC_003323
AK015520	ncRNA	TRUE	NR_045976	-143								534	0	20038	20572	1	0.026	0	1.873			1		1	1	uc007rxq.1		AK015520	Mus musculus adult male testis cDNA, RIKEN full-length enriched library, clone:4930467J12 product:unclassifiable, full insert sequence.	42.428	0.079			2.31594	0.174411	-37.3717	TCONS_00008284	XLOC_006290
AK015521	ncRNA								NM_007566			1933	0	39806	41739	3	0.046	0	1.552			5								839.156	0.434			-0.678335	0.232062		TCONS_00012733	XLOC_009906
AK015529	ncRNA				BC025806	320						698	0	123896	124594	4	0.006	0	5.731			1			1	uc007ikt.1		AK015529	Mus musculus adult male testis cDNA, RIKEN full-length enriched library, clone:4930469K13 product:unclassifiable, full insert sequence.	104.009	0.149			-0.84588	0.189457		TCONS_00004433	XLOC_003592
AK015531	ncRNA								NM_028096			1798	0	128	1926	1	0.934	0	0.556			2		1	1					206.906	0.115			-1.00921	0.128528		TCONS_00000115	XLOC_000105
AK015532	ncRNA		AK015534	-85							AK015534,AK154916,BC139380,BC139419,NM_001033172,NM_001164367	918	0	0	919	0	1	0	0			2		1						50.49	0.055			0.911868	0.0610163	-40.6896	TCONS_00014352	XLOC_011102
AK015533	ncRNA		BC089360	52	NM_001013786	878					AK076559,AK132880,BC059882,BC089360,NM_001012311,NM_001162919,NM_001162920	447	0	0	447	0	1	0	0											23.54	0.053				0.162552		TCONS_00006770	XLOC_005275
AK015539	ncRNA	TRUE										660	0	18413	19073	3	0.035	0	4.545					1	1					103.774	0.157			-0.768978	0.0550734		TCONS_00025962	XLOC_020275
AK015545	ncRNA						AK198288,BC056383,NM_001170849,AK046307,AK134191,AF318301,BC056970,BC056354,NM_138680,NM_001170848,BC020058,AK147889	AK046307				1519	0	0	1519	0	1	0	0			9				uc009bkq.1		AK015545	Mus musculus adult male testis cDNA, RIKEN full-length enriched library, clone:4930471C18 product:unclassifiable, full insert sequence.	314.619	0.207			-0.277427	0.00982323		TCONS_00022638	XLOC_017641
AK015549	ncRNA	TRUE										1514	0	1380	2894	1	0.523	0	0.661					1						19.689	0.013	TRUE		-1.18277	0.0833718	-64.7679	TCONS_00003370	XLOC_002720
AK015551	ncRNA	TRUE										692	0	151	843	1	0.821	0	1.445					1	1					29.72	0.043			-0.942617	0.0220423		TCONS_00006910	XLOC_005388
AK015559	ncRNA	TRUE										748	0	415	1163	1	0.643	0	1.337			1		1	1					2.198	0.003			1.31518	0.201756		TCONS_00001113	XLOC_000816
AK015565	ncRNA		BC086651	-811							BC082789,BC086651,NM_001005507,NM_001160256	1770	0	0	1772	0	1	0	0			2								225.57	0.127				0.0908823		TCONS_00000732	XLOC_000530
AK015566	ncRNA								AK011310			1035	0	7107	8142	2	0.127	0	1.932			1		1	1	uc007ojx.1		AK015566	Mus musculus adult male testis cDNA, RIKEN full-length enriched library, clone:4930473H19 product:unclassifiable, full insert sequence.	201.248	0.194			-0.667975	0.0537087	-97.3277	TCONS_00006392	XLOC_005050
AK015569	ncRNA	TRUE										899	0	3992	4891	2	0.184	0	2.225					4	4					71.43	0.079			-0.985793	0.0690682		TCONS_00023207	XLOC_018086
AK015570	ncRNA								NM_027990			981	0	48	1029	1	0.953	0	1.019			1								103.361	0.105			-0.212901	0.638076	-14.0108	TCONS_00016412	XLOC_012683
AK015571	ncRNA	TRUE										837	0	0	837	0	1	0	0			2		1	1					129.021	0.154			-1.17011	0.0065918		TCONS_00001445	XLOC_001112
AK015572	ncRNA									NM_028886		1742	0	20565	22307	4	0.078	0	2.296			2		4	3					377.668	0.217			-1.16796	0.0734297	-8.2868	TCONS_00022603	XLOC_017613
AK015574	ncRNA		AK195262	-535					NM_001190466		BC052999	1165	0	0	1166	0	1	0	0			1								512.578	0.44			-0.945606	0.15506		TCONS_00006253	XLOC_004935
AK015579	ncRNA	TRUE										621	0	244	865	1	0.718	0	1.61			2		1	1					103.548	0.167			-1.09102	0.0111308		TCONS_00018546	XLOC_014305
AK015580	ncRNA	TRUE										586	0	0	587	0	1	0	0			1								17.349	0.03	TRUE		-1.17637	0.0254976		TCONS_00013569	XLOC_010545
AK015581	ncRNA	TRUE										584	0	6171	6755	2	0.086	0	3.425			2			1	uc007hed.1		AK015581	Mus musculus adult male testis cDNA, RIKEN full-length enriched library, clone:4930477N07 product:unclassifiable, full insert sequence.	41.487	0.071			-1.13836	0.0234158		TCONS_00002586	XLOC_002080
AK015582	ncRNA		AK016558	-77			AK039773,AK015791	AK039773			AF167406,AK016558,AK161264,BC140979,NM_172125	1089	0	0	1089	0	1	0	0			1		1	1					50.289	0.046			-0.96925	0.0727403	-17.3676	TCONS_00021194	XLOC_016498
AK015584	ncRNA									NM_001081288		813	0	3871	4687	2	0.174	0	2.46			2		2						127.206	0.156			0.762242	0.0625228		TCONS_00010303	XLOC_007937
AK015588	ncRNA		NM_172993	-104							AK084205,AK146353,AK149921,AK154918,AK173267,BC066136,BC089160,NM_172993	1113	0	0	1113	0	1	0	0			1			1					91.392	0.082			-0.283627	0.11618		TCONS_00021570	XLOC_016812
AK015589	ncRNA								NM_001159361			443	0	2485	2928	1	0.151	0	2.257					1						25.946	0.059			0.657774	0.0436987	-136.223	TCONS_00010627	XLOC_008189
AK015590	ncRNA	TRUE										1383	0	4517	5901	3	0.235	0	2.169			1		1	1					203.269	0.147			-0.783629	0.0648249	6.3065	TCONS_00020721	XLOC_016107
AK015596	ncRNA	TRUE										900	0	0	901	0	1	0	0			1		1						42.319	0.047				0.0468447	-45.8988	TCONS_00020851	XLOC_016210
AK015597	ncRNA	TRUE										730	0	59940	60670	2	0.012	0	2.74			1			1					20.791	0.028			-1.17248	0.0512502		TCONS_00003311	XLOC_002668
AK015601	ncRNA						AK133734,NM_001164214,NM_001164212,BC026463,NM_181988	NM_001164212				1054	0	0	1054	0	1	0	0					1						67.44	0.064			-1.11325	0.0954871	9.7806	TCONS_00024068	XLOC_018787
AK015602	ncRNA		NM_134078	-263			AF117951	AF117951				1034	0	33246	34280	2	0.03	0	1.934											169.432	0.164			0.341869	0.0546176		TCONS_00008641	XLOC_006597
AK015605	ncRNA		BC056943	-187						BC138458		1082	0	363	1446	1	0.749	0	0.924					1						181.102	0.167			-1.26873	0.0826198		TCONS_00017671	XLOC_013669
AK015607	ncRNA	TRUE										1074	0	4648	5722	4	0.188	0	3.724			1		1	1	uc007uyg.1		AK015607	Mus musculus adult male testis cDNA, RIKEN full-length enriched library, clone:1700085D13 product:hypothetical protein, full insert sequence.	33.076	0.031				0.0173284		TCONS_00009463	XLOC_007255
AK015610	ncRNA	TRUE										828	0	3338	4166	2	0.199	0	2.415			2		1	1	uc008rtv.1		AK015610	Mus musculus adult male testis cDNA, RIKEN full-length enriched library, clone:4930482G09 product:unclassifiable, full insert sequence.	37.764	0.046			-1.21312	0.0652832		TCONS_00018874	XLOC_014563
AK015612	ncRNA						AK220370,NM_177577	NM_177577				1108	0	0	1110	0	1	0	0			2								138.652	0.125			-1.18294	0.0461539		TCONS_00006789	XLOC_005292
AK015613	ncRNA								AB051562			1084	0	26103	27187	4	0.04	0	3.69											117.04	0.108			-1.12692	0.0683703		TCONS_00003361	XLOC_002712
AK015621	ncRNA	TRUE										1737	0	3110	4847	3	0.358	0	1.727			1		1	1					258.344	0.149			-1.14965	0.0419679	-122.804	TCONS_00003406	XLOC_002752
AK015622	ncRNA								BC083060			806	0	24173	24979	4	0.032	0	4.963					1	2					88.692	0.11			-1.03685	0.0378516		TCONS_00014798	XLOC_011432
AK015623	ncRNA		BC115566	317							AK053219,BC115566,BC115567	600	0	0	600	0	1	0	0					1						136.879	0.228			-0.919141	0.0535375	-243.426	TCONS_00002444	XLOC_001960
AK015626	ncRNA		NM_013720	-93					BC078639			2261	0	0	2261	0	1	0	0			5		1	1					378.848	0.168			-0.99219	0.0360678		TCONS_00016804	XLOC_013001
AK015628	ncRNA	TRUE										1125	0	14039	15164	7	0.074	0	6.222							uc007ozg.2		4933406K04Rik	Mus musculus adult male testis cDNA, RIKEN full-length enriched library, clone:4930426M03 product:unclassifiable, full insert sequence.	113.37	0.101			-0.861271	0.138412	-2.4797	TCONS_00006479	XLOC_005124
AK015629	ncRNA	TRUE										1096	0	0	1096	0	1	0	0			1								81.389	0.074				0.0322971		TCONS_00004606	XLOC_003708
AK015631	ncRNA		NM_175213	150								907	0	86291	87199	3	0.01	0	3.308					1	4					22.875	0.025			-1.08731	0.151688		TCONS_00028513	XLOC_022274
AK015636	ncRNA	TRUE										632	0	0	632	0	1	0	0					1	1					39.078	0.062			-1.46204	0.0113458		TCONS_00025535	XLOC_019929
AK015637	ncRNA		AK188849	48						AK132843	AK028264,AK030751,AK146109,AK149931,AK151109,AK151418,AK153012,AK153249,AK159177,AK159475,AK159509,AK160889,AK167794,AK169140,AK190461,AK194156,AK194951,AK201680,AK202683,AK205885,BC043053,BC049114,NM_009503,Z14044	910	0	0	912	0	1	0	0					1						523.795	0.576			-1.25005	0.176387		TCONS_00019076	XLOC_014726
AK015639	ncRNA		AK162568	-185							AK029942,AK034583,AK083583,AK140606,AK162568,BC139070,BC141201,NM_172509	1348	0	0	1357	0	1	0	0					1						257.672	0.191				0.020269		TCONS_00022150	XLOC_017268
AK015647	ncRNA				AK160434	-77			NM_001113384			1841	0	24	1865	1	0.987	0	0.543	1										1343.31	0.73			-1.03845	0.272419	-93.067	TCONS_00027087	XLOC_021084
AK015648	ncRNA	TRUE										1561	0	8200	9761	2	0.16	0	1.281					1	5					162.275	0.104			-1.22617	0.0322338		TCONS_00026294	XLOC_020538
AK015649	ncRNA	TRUE										1077	0	2417	3494	2	0.308	0	1.857											15.301	0.014				0.207568		TCONS_00012354	XLOC_009609
AK015653	ncRNA								BC021518			918	0	4379	5297	1	0.173	0	1.089			1								80.206	0.087			-0.640924	0.324263	-13.1213	TCONS_00012783	XLOC_009948
AK015655	ncRNA		AK140935	68								461	0	8511	8972	2	0.051	0	4.338					2	3					55.871	0.121			-1.06188	0.246745	15.089	TCONS_00007565	XLOC_005824
AK015656	ncRNA		NM_001045558	-16						BC048937	AK050224,AK090155,AK162724,BC023088,BC048788,NM_001045558,NM_008837,Z46720	1156	0	0	1163	0	1	0	0			1								117.094	0.101			-1.02773	0.044509	-2.6385	TCONS_00010476	XLOC_008073
AK015657	ncRNA		AK041978	-256						NM_019549		1053	0	14907	15960	4	0.066	0	3.799			4		1		uc007ibr.1		AK015657	Mus musculus 10, 11 days embryo whole body cDNA, RIKEN full-length enriched library, clone:2810442I21 product:unclassifiable, full insert sequence.	28.542	0.027	TRUE		-0.93566	0.100629		TCONS_00004315	XLOC_003495
AK015659	ncRNA		NM_020559	-5						NM_031178		717	0	230	948	1	0.757	0	1.395											16.574	0.023			-1.07346	0.145926		TCONS_00027872	XLOC_021746
AK015661	ncRNA	TRUE										1236	0	16794	18034	1	0.069	0	0.809					1	1					217.459	0.176			-0.92257	0.0291765		TCONS_00028859	XLOC_022550
AK015664	ncRNA	TRUE										1043	0	104063	105106	2	0.01	0	1.918			1		1		uc007zre.1		AK015664	Mus musculus adult male testis cDNA, RIKEN full-length enriched library, clone:4930500H12 product:unclassifiable, full insert sequence.	139.7	0.134			-0.92999	0.129009	-18.7758	TCONS_00011117	XLOC_008596
AK015676	ncRNA	TRUE										948	0	0	948	0	1	0	0			2		1						99.348	0.105			-1.06963	0.0314562		TCONS_00017381	XLOC_013442
AK015689	ncRNA	TRUE										749	0	0	749	0	1	0	0						1					116.879	0.156			2.1574	0.202605	-38.1784	TCONS_00029265	XLOC_022868
AK015693	ncRNA		NM_010864	-51							AK032713,NM_010864,X57377	764	0	0	765	0	1	0	0											62.268	0.082			-1.17188	0.054501	-141.794	TCONS_00028477	XLOC_022240
AK015695	ncRNA	TRUE										1101	0	3085	4186	2	0.263	0	1.817					1						165.127	0.15			-0.802348	0.085613		TCONS_00009831	XLOC_007543
AK015703	ncRNA											939	0	14949	15888	3	0.059	0	3.195			3				uc008dfa.1		AK015703	Mus musculus adult male testis cDNA, RIKEN full-length enriched library, clone:4930505H01 product:hypothetical protein, full insert sequence.	326.657	0.348			3.08414	0.130073		TCONS_00012142	XLOC_009425
AK015704	ncRNA	TRUE										546	0	9340	9886	2	0.055	0	3.663											56.208	0.103			-1.14203	0.0503058		TCONS_00024750	XLOC_019346
AK015708	ncRNA		AK085966	306								945	0	14305	15250	1	0.062	0	1.058					1						259.863	0.275			0.981209	0.00268809		TCONS_00014245	XLOC_011014
AK015710	ncRNA	TRUE										1564	0	0	1564	0	1	0	0	2		4		1	2					109.644	0.07			-1.18732	0.0202578		TCONS_00010103	XLOC_007762
AK015712	ncRNA								AK019476			971	0	52498	53469	3	0.018	0	3.09			1				uc009nga.1		AK015712	Mus musculus adult male testis cDNA, RIKEN full-length enriched library, clone:4930506A18 product:unclassifiable, full insert sequence.	164.179	0.169			-0.792586	0.0699167	-59.2276	TCONS_00026223	XLOC_020481
AK015714	ncRNA		BC091770	-21								937	0	16778	17715	4	0.053	0	4.269			1				uc008ajk.1		AK015714	Mus musculus adult male testis cDNA, RIKEN full-length enriched library, clone:4930506C21 product:unclassifiable, full insert sequence.	134.701	0.144			3.27533	0.125043		TCONS_00012320	XLOC_009582
AK015723	ncRNA	TRUE										1468	0	0	1469	0	1	0	0	1		4		1						179.935	0.123			-0.197659	0.0419723		TCONS_00026713	XLOC_020766
AK015727	ncRNA		NM_029367	-88						U57353		1152	0	6768	7920	2	0.145	0	1.736			1								49.117	0.043			-1.11312	0.0271474		TCONS_00004812	XLOC_003872
AK015731	ncRNA								AK052409			844	0	0	844	0	1	0	0											48.804	0.058			-0.97907	0.0415911		TCONS_00017575	XLOC_013600
AK015734	ncRNA	TRUE										1103	0	0	1103	0	1	0	0					1						160.712	0.146			-1.20411	0.0318863	-168.662	TCONS_00026296	XLOC_020540
AK015735	ncRNA		AK049834	-74							AK028438,AK040507,AK049834,AK150952,AK167758,BC027330,BC029320,NM_145931,NR_027502	2094	0	0	2094	0	1	0	0					1						285.729	0.136			-1.15399	0.194697	101.866	TCONS_00010726	XLOC_008272
AK015736	ncRNA						AK155089,BC138422,NM_001025067,AK173030,AK036116,BC094228,AK158022	BC094228				1205	0	0	1215	0	1	0	0			2								150.057	0.125			-1.20576	0.0207623		TCONS_00018612	XLOC_014360
AK015743	ncRNA		AK046647	200							AK013385,AK032696,AK046647,AK076487,AK140382,AK150311,AK160297,AK160572,AK171141,BC020067,NM_026368	533	0	0	533	0	1	0	0			1		1						139.964	0.263			1.4407	0.0663761		TCONS_00019269	XLOC_014888
AK015744	ncRNA	TRUE										1932	0	4654	6586	3	0.293	0	1.553			4		1		uc011ykg.1		AK015744	Mus musculus adult male testis cDNA, RIKEN full-length enriched library, clone:4930511A02 product:unclassifiable, full insert sequence.	146.872	0.076			-0.988578	0.0810695	-99.3822	TCONS_00005231	XLOC_004208
AK015748	ncRNA	TRUE										435	0	0	435	0	1	0	0			1		1	1					63.026	0.145			-1.41319	0.0201788		TCONS_00004721	XLOC_003795
AK015749	ncRNA											495	0	113	608	1	0.814	0	2.02	1		1		1		uc008mqa.1		AK015749	Mus musculus adult male testis cDNA, RIKEN full-length enriched library, clone:4930511F01 product:unclassifiable, full insert sequence.	27.216	0.055			-1.41201	0.126035	81.9216	TCONS_00015809	XLOC_012209
AK015751	ncRNA		NM_001037741	-93					AK145770	BC019206	AB072797,AF045768,AF045769,AF274027,AK006441,AK160389,AK160509,AK167881,AK168027,BC083137,BC106147,D87896,NM_001037741,NM_008162,X94483	710	0	0	716	0	1	0	0											143.136	0.202			-1.14931	0.0763869	88.5754	TCONS_00003119	XLOC_002515
AK015759	ncRNA						U59418	U59418				1528	0	206	1734	1	0.881	0	0.654			2			1					256.964	0.168			-1.10982	0.0743441		TCONS_00005934	XLOC_004670
AK015760	ncRNA								AK005868			887	0	5631	6519	3	0.136	0	3.382			1		1	1					49.456	0.056			-0.609893	0.236699	-79.8353	TCONS_00013703	XLOC_010635
AK015764	ncRNA	TRUE										1275	0	0	1275	0	1	0	0			1			1					597.936	0.469			-0.761955	0.328125		TCONS_00024139	XLOC_018849
AK015765	ncRNA									NM_025896		391	0	13026	13417	2	0.029	0	5.115			1			2					7.989	0.02			-0.94958	0.0465064		TCONS_00006793	XLOC_005295
AK015767	ncRNA		AK161329	-56					AK018551		AK161329	729	0	0	729	0	1	0	0			3								26.989	0.037			-1.10535	0.0121795		TCONS_00013691	XLOC_010628
AK015772	ncRNA	TRUE										1382	0	8393	9775	1	0.141	0	0.724			2		1		uc009luk.1		AK015772	Mus musculus adult male testis cDNA, RIKEN full-length enriched library, clone:4930512H18 product:RIKEN cDNA 4930512H18 gene, full insert sequence.	144.612	0.105				0.143833	-24.3906	TCONS_00025974	XLOC_020286
AK015774	ncRNA	TRUE										502	0	3187	3691	1	0.137	0	1.992											81.289	0.162			-0.656977	0.206033	16.4112	TCONS_00023742	XLOC_018517
AK015775	ncRNA		AK197759	105					NM_145361	AK152413	AK046604,BC016566,BC069864,BC083320	666	0	0	666	0	1	0	0					1						128.278	0.193			-0.889194	0.357994		TCONS_00002372	XLOC_001898
AK015779	ncRNA									NM_010474		810	0	140194	141004	4	0.006	0	4.938			2		1						37.18	0.046			-1.19796	0.0464929		TCONS_00021623	XLOC_016852
AK015783	ncRNA	TRUE										1317	0	0	1318	0	1	0	0			2		1						136.911	0.104			-1.03807	0.052454		TCONS_00025462	XLOC_019870
AK015786	ncRNA								AY177410			1263	0	0	1263	0	1	0	0			3		1	1					86.738	0.069			-1.04545	0.0818411	-59.5019	TCONS_00025616	XLOC_019993
AK015787	ncRNA	TRUE	AK147669	-170							AK054038,AK147669,AK220332,BC066074,NM_001037736,NM_172751	903	0	0	903	0	1	0	0					2						55.223	0.061			-1.05687	0.0701981	36.3063	TCONS_00026603	XLOC_020675
AK015800	ncRNA		AK005868	-56								751	0	2539	3291	2	0.229	0	2.663			2								37.184	0.05			-1.03945	0.09354	-217.918	TCONS_00013702	XLOC_010636
AK015801	ncRNA		NM_172456	-92								1195	0	3358	4553	3	0.262	0	2.51			2			1					528.269	0.442			-1.24433	0.0331531	-28.9834	TCONS_00028768	XLOC_022484
AK015804	ncRNA								AK132913			977	0	0	977	0	1	0	0					1	2					56.443	0.058			-1.05655	0.0456786		TCONS_00002258	XLOC_001799
AK015812	ncRNA								AK162776			1676	0	0	1676	0	1	0	0			3								63.989	0.038				0.0542208	-15.6157	TCONS_00023756	XLOC_018528
AK015813	ncRNA									BC054749		561	0	6570	7131	1	0.079	0	1.783							uc009nhi.1		AK015813	Mus musculus adult male testis cDNA, RIKEN full-length enriched library, clone:4930517G24 product:unclassifiable, full insert sequence.	28.97	0.052			-1.19333	0.0709189		TCONS_00026229	XLOC_020486
AK015814	ncRNA											1037	0	14368	15405	6	0.067	0	5.786					1		uc007qtp.1		AK015814	Mus musculus adult male testis cDNA, RIKEN full-length enriched library, clone:4930517I18 product:unclassifiable, full insert sequence.	171.329	0.165			-1.26039	0.0598843		TCONS_00006980	XLOC_005444
AK015815	ncRNA								M97013			1568	0	0	1568	0	1	0	0					1	2					145.125	0.093			-1.25841	0.0351727	-98.4416	TCONS_00019095	XLOC_014741
AK015816	ncRNA	TRUE							AK186662			968	0	1523	2492	2	0.389	0	2.066					3	3					183.988	0.19			-0.897955	0.0431071		TCONS_00011806	XLOC_009156
AK015817	ncRNA				NM_028843	974						1133	0	40318	41451	4	0.027	0	3.53					2	4	uc009rke.1		Iqcf3	Mus musculus adult male testis cDNA, RIKEN full-length enriched library, clone:4930517N10 product:hypothetical protein, full insert sequence.	109.698	0.097			0.0861373	0.0438838		TCONS_00028651	XLOC_022387
AK015821	ncRNA	TRUE										1157	0	0	1157	0	1	0	0	1		3		1						185.629	0.16				0.0669949		TCONS_00008745	XLOC_006683
AK015822	ncRNA								AK053913			477	0	2165	2642	1	0.181	0	2.096			1								78.84	0.165			-0.884312	0.0486024	-272.782	TCONS_00021663	XLOC_016887
AK015828	ncRNA	TRUE										650	0	0	650	0	1	0	0			1		1	1					100.786	0.155			-1.30013	0.0156359		TCONS_00009638	XLOC_007409
AK015829	ncRNA		BC099972	111							AK132674,BC099972,NM_001134741	1464	0	0	1464	0	1	0	0			1								40.557	0.028			-1.27426	0.0347283		TCONS_00000742	XLOC_000539
AK015830	ncRNA	TRUE										571	0	18774	19345	2	0.03	0	3.503					1	1					14.855	0.026			-0.674235	0.0513059		TCONS_00026849	XLOC_020889
AK015832	ncRNA								BC145243	BC064739		845	0	50838	51683	3	0.016	0	3.55					1	1					152.206	0.18			-0.275586	0.0793672		TCONS_00020872	XLOC_016227
AK015836	ncRNA	TRUE										1523	0	3136	4659	1	0.327	0	0.657					1						464.808	0.305	TRUE		-1.28646	0.0791968	-65.3954	TCONS_00005241	XLOC_004214
AK015838	ncRNA						AF303452	AF303452				1137	0	8080	9217	3	0.123	0	2.639			2		1	1					61.727	0.054			-1.18441	0.0144071		TCONS_00006819	XLOC_005310
AK015840	ncRNA	TRUE										1665	0	0	1665	0	1	0	0			1		1						438.334	0.263			-0.857522	0.066909	-30.0653	TCONS_00020742	XLOC_016125
AK015841	ncRNA				BC125488	-91						618	0	40857	41475	1	0.015	0	1.618			1								71.044	0.115				0.266673		TCONS_00002836	XLOC_002281
AK015845	ncRNA	TRUE										617	0	9520	10137	2	0.061	0	3.241			1		1						178.93	0.29			1.43185	0.0552202		TCONS_00017947	XLOC_013897
AK015846	ncRNA	TRUE	AK037503	-981	AK036727	761						1084	0	0	1084	0	1	0	0			4		1						50.345	0.046			-1.09313	0.0354014		TCONS_00004435	XLOC_003594
AK015849	ncRNA									NM_008082		710	0	0	710	0	1	0	0					1						27.323	0.038			-0.615133	0.00429281		TCONS_00013897	XLOC_010781
AK015850	ncRNA		NM_008602	-150							AF201391,AK014871,AK029716,AK078813,AK086653,AK149142,BC005596,BC034711,NM_001164167,NM_001164168,NM_001164169,NM_001164170,NM_008602	930	0	0	931	0	1	0	0											111.688	0.12			-1.21427	0.0376578	-99.673	TCONS_00013863	XLOC_010752
AK015851	ncRNA								NM_009384			944	0	0	945	0	1	0	0			2		2	2					439.011	0.465				0.0801253	323.865	TCONS_00011221	XLOC_008656
AK015852	ncRNA								EU234029		AK015000,AK133229,BC137967,L41069,NM_011516,Z38118	849	0	0	850	0	1	0	0			2								142.925	0.168			-1.20776	0.199867		TCONS_00017726	XLOC_013716
AK015853	ncRNA		AK079283	-172					AK051409			1190	0	0	1190	0	1	0	0			2		1						457.607	0.385			-1.02382	0.0876718	-132.931	TCONS_00009407	XLOC_007214
AK015854	ncRNA		AK006345	349					AK028643		AK052818,AK053651,AK122421,AK147340,BC048908,BC062100,BC080280,BC137614,BC144782,NM_001168304,NM_198164	1774	0	0	1774	0	1	0	0			1								792.686	0.447			2.6718	0.0667252		TCONS_00002909	XLOC_002341
AK015855	ncRNA		AK016862	-185								1531	0	7283	8814	2	0.174	0	1.306			2		3	4	uc009rxf.1		AK015855	Mus musculus adult male testis cDNA, RIKEN full-length enriched library, clone:4930520O04 product:unclassifiable, full insert sequence.	53.371	0.035			-0.10893	0.0668462		TCONS_00027933	XLOC_021795
AK015859	ncRNA								BC058385			1271	0	619	1890	1	0.672	0	0.787			2		1						183.954	0.145			-1.14665	0.0282045	1.3216	TCONS_00022213	XLOC_017323
AK015862	ncRNA	TRUE										1767	0	0	1767	0	1	0	0			4			1					85.177	0.048			-1.20163	0.0248782		TCONS_00007461	XLOC_005736
AK015865	ncRNA	TRUE										491	0	10739	11230	2	0.044	0	4.073											42.506	0.087			-1.15177	0.0413024		TCONS_00003059	XLOC_002465
AK015867	ncRNA	TRUE										843	0	17543	18386	2	0.046	0	2.372			1				uc012dtp.1		4930584F24Rik	Mus musculus adult male testis cDNA, RIKEN full-length enriched library, clone:1700001J09 product:unclassifiable, full insert sequence.	71.126	0.084			0.581907	0.0865161		TCONS_00021547	XLOC_016791
AK015876	ncRNA		AK140747	-745					NM_008779			509	0	40196	40705	4	0.013	0	7.859			2								54.64	0.107			-1.1695	0.0207794		TCONS_00023035	XLOC_017949
AK015880	ncRNA	TRUE										1870	0	29075	30945	4	0.06	0	2.139			7		1						136.882	0.073			-1.1825	0.0519789		TCONS_00023348	XLOC_018194
AK015886	ncRNA		BC049098	-122							AK077409,AK135733,BC011172,BC049098,NM_001077265,NM_001077266,NM_001077267,NM_007516,U11273,U11274	603	0	0	603	0	1	0	0					1						96.901	0.161			4.07031	0.0311805		TCONS_00021009	XLOC_016346
AK015895	ncRNA				AK167985	45						582	0	3630	4212	1	0.138	0	1.718					1	1					179.918	0.309			-1.06583	0.0456429		TCONS_00021938	XLOC_017126
AK015900	ncRNA	TRUE										1670	0	1773	3443	1	0.485	0	0.599			1				uc007qpo.1		AK015900	Mus musculus adult male testis cDNA, RIKEN full-length enriched library, clone:4930526F13 product:unclassifiable, full insert sequence.	107.917	0.065			-0.750561	0.125189	-4.961	TCONS_00007788	XLOC_005994
AK015902	ncRNA	TRUE	AK089337	348								1178	0	20258	21436	2	0.055	0	1.698					1						441.76	0.375			-0.964212	0.0954424	-52.0223	TCONS_00008250	XLOC_006262
AK015904	ncRNA		BC096544	243					NM_001163415			843	0	1679	2522	2	0.334	0	2.372					1	1	uc009shg.1		4930526I15Rik	Mus musculus adult female placenta cDNA, RIKEN full-length enriched library, clone:1600027J15 product:unclassifiable, full insert sequence.	65.191	0.077			-1.15832	0.00438905		TCONS_00028807	XLOC_022513
AK015908	ncRNA	TRUE	NR_040681	-115								953	0	0	953	0	1	0	0											41.888	0.044			-0.759137	0.0478396		TCONS_00020821	XLOC_016190
AK015909	ncRNA	TRUE										558	0	298	856	1	0.652	0	1.792											64.55	0.116				0.0109966	-73.1706	TCONS_00015533	XLOC_012008
AK015910	ncRNA						AK050031,AK043952,AK147744,AK153998,NM_024475	NM_024475				1969	0	0	1969	0	1	0	0			2								45.257	0.023			-1.15652	0.16393	34.0838	TCONS_00004485	XLOC_003638
AK015914	ncRNA	TRUE										762	0	18433	19195	6	0.04	0	7.874			1		1		uc007tgr.1		AK015914	Mus musculus adult male testis cDNA, RIKEN full-length enriched library, clone:1700086A16 product:RIKEN cDNA 4930527F14 gene, full insert sequence.	32.565	0.043			-1.05185	0.103389		TCONS_00008489	XLOC_006468
AK015915	ncRNA								NM_025645			1045	0	0	1045	0	1	0	0						1					17.541	0.017			-0.000642855	0.0300433		TCONS_00020324	XLOC_015785
AK015923	ncRNA									NM_001167593		1339	0	227	1566	1	0.855	0	0.747											58.266	0.044			-1.00379	0.0062399		TCONS_00006992	XLOC_005453
AK015927	ncRNA	TRUE										1723	0	16300	18023	3	0.096	0	1.741					1	1					122.542	0.071			-1.10073	0.0647513		TCONS_00024125	XLOC_018837
AK015928	ncRNA		AK029922	323							AK041004,AK042073,AK052271,AK122459,AK163706,BC147502,BC172034,NM_001037740,NM_177204	610	0	0	610	0	1	0	0					1						88.754	0.145			-1.02944	0.0131556		TCONS_00022526	XLOC_017570
AK015936	ncRNA	TRUE										589	0	5717	6306	1	0.093	0	1.698			1		1						56.595	0.096			-0.553963	0.211313		TCONS_00017153	XLOC_013268
AK015937	ncRNA	TRUE										1178	0	36541	37719	8	0.031	0	6.791			2			1	uc007utz.1		AK015937	Mus musculus adult male testis cDNA, RIKEN full-length enriched library, clone:4930529K09 product:unclassifiable, full insert sequence.	74.762	0.063			-1.18597	0.0553413		TCONS_00008716	XLOC_006659
AK015940	ncRNA	TRUE										364	0	295	659	1	0.552	0	2.747							uc007qcb.1		AK015940	Mus musculus adult male testis cDNA, RIKEN full-length enriched library, clone:4930529N20 product:unclassifiable, full insert sequence.	61.934	0.17			-0.960847	0.0375803	-72.1145	TCONS_00007669	XLOC_005894
AK015943	ncRNA		AK049657	-192								699	0	2706	3405	1	0.205	0	1.431											53.167	0.076			-1.32005	0.0494608		TCONS_00001919	XLOC_001511
AK015944	ncRNA								NM_001205341			1724	0	45562	47286	6	0.036	0	3.48			6				uc007gyt.1		AK015944	Mus musculus adult male testis cDNA, RIKEN full-length enriched library, clone:4930532I03 product:unclassifiable, full insert sequence.	28.589	0.017			-0.183599	0.02448		TCONS_00003258	XLOC_002627
AK015945	ncRNA		BC051965	-202							AB221679,AF209854,AK088686,BC051965,BC057336,BC075717,BC118948,BC118949,NM_017395	623	0	0	623	0	1	0	0			1		2	3					221.847	0.356			-1.36866	0.0106799		TCONS_00018524	XLOC_014287
AK015950	ncRNA	TRUE										481	0	14247	14728	2	0.033	0	4.158					1	1	uc007dau.1		AK015950	Mus musculus adult male testis cDNA, RIKEN full-length enriched library, clone:4930532M18 product:unclassifiable, full insert sequence.	0.619	0.001			-0.936614	0.0400879		TCONS_00000737	XLOC_000535
AK015952	ncRNA								NM_011642			859	0	0	859	0	1	0	0					1	1					34.053	0.04			-0.904714	0.193938	1.3547	TCONS_00019702	XLOC_015247
AK015958	ncRNA	TRUE										1525	0	43429	44954	7	0.034	0	4.59			4		1	1	uc009hwi.1		AK015958	Mus musculus adult male testis cDNA, RIKEN full-length enriched library, clone:4930533N22 product:unclassifiable, full insert sequence.	30.804	0.02				0.0647111		TCONS_00024456	XLOC_019112
AK015963	ncRNA	TRUE										659	0	11465	12124	3	0.054	0	4.552											35.39	0.054			-1.30148	0.0295222		TCONS_00003172	XLOC_002562
AK015964	ncRNA								NM_001077190			880	0	0	880	0	1	0	0			4		1	2					98.133	0.112			-1.15168	0.0191393		TCONS_00014997	XLOC_011580
AK015965	ncRNA				AK155630	-424			BC049803	AK186652		500	0	4536	5036	1	0.099	0	2					1	1					148.509	0.297			-0.622648	0.25609	-140.268	TCONS_00004636	XLOC_003722
AK015970	ncRNA									AK179884		778	0	13793	14571	2	0.053	0	2.571					1						116.848	0.15			0.170641	0.0802143		TCONS_00018380	XLOC_014167
AK015974	ncRNA								AK139590	AK135733		912	0	0	913	0	1	0	0			2		1						70.833	0.078			-1.19591	0.0253485		TCONS_00021899	XLOC_017089
AK015975	ncRNA		NM_177779	-79								1333	0	2359	3694	1	0.361	0	0.75			1			1					64.58	0.048			-0.111382	0.177743	-0.6058	TCONS_00004703	XLOC_003778
AK015977	ncRNA	TRUE										652	0	873	1525	1	0.428	0	1.534	1				1	1					65.556	0.101			-1.25847	0.0671204		TCONS_00018410	XLOC_014191
AK015981	ncRNA	TRUE										1509	0	0	1513	0	1	0	0	1		6		1						98.783	0.065			-1.07176	0.0410403		TCONS_00014770	XLOC_011411
AK015982	ncRNA										AB017616,AK150792,AK159355,AK159434,AK166658,BC005417,BC071245,NM_017475	1067	0	0	1067	0	1	0	0			1								473.611	0.444			3.13057	0.245011		TCONS_00020258	XLOC_015739
AK015983	ncRNA	TRUE										419	0	573	992	1	0.422	0	2.387											18.05	0.043			-0.710849	0.0772545	-26.9557	TCONS_00026126	XLOC_020409
AK015984	ncRNA		AK076464	10					AK009735	AK149137	AK002826,AK031609,AK076464,AK085926,AK150184,AY510273,AY731699,AY894805,BC019188,BC044737,BC044781,BC054825,BC064747,NM_001163689,NM_025802,NR_028142	1098	0	0	1098	0	1	0	0											165.714	0.151			-0.996998	0.101793	49.1371	TCONS_00025676	XLOC_020047
AK015985	ncRNA										AK041594,AK141586	1683	0	0	1683	0	1	0	0			3								1020.69	0.606			-1.0186	0.0691936		TCONS_00018504	XLOC_014274
AK015999	ncRNA	TRUE	AK167138	-525	AK047963	538			Guttman10_novel_lincs_TCONS_00001898			1405	0	128	1534	1	0.917	0	0.712	1		3		1						58.158	0.041	TRUE		-1.26387	0.0421104		TCONS_00018796	XLOC_014496
AK016005	ncRNA	TRUE							AK136672			461	0	0	461	0	1	0	0			1			1					8.447	0.018			-1.10518	0.022678		TCONS_00026560	XLOC_020638
AK016007	ncRNA		NM_010957	-296						AK205870		538	0	17476	18014	2	0.03	0	3.717			1		1		uc009dfe.1		AK016007	Mus musculus adult male testis cDNA, RIKEN full-length enriched library, clone:4930540D11 product:unclassifiable, full insert sequence.	146.92	0.273			-0.790818	0.115666		TCONS_00023916	XLOC_018655
AK016008	ncRNA	TRUE										1146	0	0	1146	0	1	0	0			6		1	1					54.534	0.048				0.00927736		TCONS_00028616	XLOC_022356
AK016012	ncRNA		NM_011236	-44						BC054836		2068	0	4427	6495	2	0.318	0	0.967			2			1					226.485	0.11			-0.989757	0.112632		TCONS_00023967	XLOC_018702
AK016016	ncRNA		AK005868	-63								672	0	17344	18016	2	0.037	0	2.976			1		1	1	uc008ezf.2		AK016016	Mus musculus adult male testis cDNA, RIKEN full-length enriched library, clone:4930542C11 product:unclassifiable, full insert sequence.	84.295	0.125			-1.12067	0.0238551		TCONS_00013701	XLOC_010636
AK016022	ncRNA	TRUE										603	0	988	1591	1	0.379	0	1.658			3		2	3					161.458	0.268			-1.19688	0.0271615		TCONS_00012539	XLOC_009751
AK016024	ncRNA	TRUE	NM_001033550	-104	AK051451	-625					AK083378,NM_001033550	2382	0	0	2383	0	1	0	0			2		1	1					222.678	0.093			-0.293196	0.0979243		TCONS_00021935	XLOC_017123
AK016027	ncRNA								NM_001100449			589	0	3121	3710	1	0.159	0	1.698			1				uc008edm.1		AK016027	Mus musculus adult male testis cDNA, RIKEN full-length enriched library, clone:4930543D07 product:unclassifiable, full insert sequence.	31.79	0.054			-1.07862	0.0492825		TCONS_00013488	XLOC_010474
AK016028	ncRNA	TRUE										1495	0	40353	41848	5	0.036	0	3.344			1			1	uc009jhd.1		AK016028	Mus musculus adult male testis cDNA, RIKEN full-length enriched library, clone:4930543E12 product:unclassifiable, full insert sequence.	314.592	0.21				0.0322743	-11.7039	TCONS_00025500	XLOC_019900
AK016029	ncRNA	TRUE										729	0	27586	28315	4	0.026	0	5.487					1	1					52.855	0.073			-0.895364	0.0375745	-75.041	TCONS_00009956	XLOC_007644
AK016030	ncRNA	TRUE							AK139516			950	0	0	950	0	1	0	0											58.788	0.062			-1.02614	0.0972388		TCONS_00002296	XLOC_001831
AK016032	ncRNA	TRUE										1117	0	11636	12753	4	0.088	0	3.581	1						uc009kfa.1		AK016032	Mus musculus adult male testis cDNA, RIKEN full-length enriched library, clone:4930543N07 product:unclassifiable, full insert sequence.	49.609	0.044			1.98267	0.0709603	-13.5849	TCONS_00024869	XLOC_019442
AK016034	ncRNA								AK030533			1722	0	3046	4770	1	0.361	0	0.581	1		1								132.694	0.077			-1.30678	0.0604282	-19.446	TCONS_00009761	XLOC_007508
AK016038	ncRNA								NM_001163675			2127	0	0	2127	0	1	0	0			1			1					60.735	0.029				0.146356		TCONS_00008811	XLOC_006729
AK016039	ncRNA									AK133138		872	0	0	873	0	1	0	0					1										-1.11914	0.0599411		TCONS_00024269	XLOC_018958
AK016042	ncRNA				AK177280	-173	AK089994	AK089994	NM_001083319	AK089994		622	0	393	1015	1	0.613	0	1.608			1		2	3					112.828	0.181			-0.957218	0.119434		TCONS_00028707	XLOC_022438
AK016044	ncRNA		NM_172916	486								1282	0	933	2215	1	0.579	0	0.78			1		1						67.039	0.052			-1.09904	0.0157098		TCONS_00027161	XLOC_021145
AK016047	ncRNA	TRUE										1432	0	250588	252022	4	0.006	0	2.793			1		1						37.098	0.026			0.680132	0.140856		TCONS_00001411	XLOC_001084
AK016048	ncRNA	TRUE										1227	0	40629	41856	4	0.029	0	3.26			1			1					244.7	0.199				0.032426	-11.7039	TCONS_00025501	XLOC_019900
AK016049	ncRNA	TRUE										567	0	50772	51339	2	0.011	0	3.527					1						5.767	0.01			-0.497395	0.0357249		TCONS_00006214	XLOC_004907
AK016050	ncRNA	TRUE										591	0	0	591	0	1	0	0			1		1						25.172	0.043			-1.10789	0.0205591	-66.8333	TCONS_00016768	XLOC_012969
AK016051	ncRNA		NM_027036	-148			AK046385,AK140129	AK046385				518	0	1429	1947	2	0.266	0	3.861					1						49.641	0.096			1.97747	0.127712	-165.762	TCONS_00019515	XLOC_015090
AK016055	ncRNA						AK015306	AK015306				858	0	0	858	0	1	0	0			1								38.485	0.045			-0.947207	0.051137	-79.8542	TCONS_00028000	XLOC_021849
AK016056	ncRNA	TRUE										907	0	208	1115	1	0.813	0	1.103			3		1						17.369	0.019			1.65323	0.103646	9.2366	TCONS_00007996	XLOC_006079
AK016075	ncRNA								NM_001081977			1260	0	23772	25032	4	0.05	0	3.175			1		1						91.773	0.073			-0.768885	0.264075		TCONS_00005296	XLOC_004255
AK016082	ncRNA	TRUE										659	0	16330	16989	1	0.039	0	1.517			1			1									-1.07142	0.0510413		TCONS_00011926	XLOC_009247
AK016084	ncRNA									BC062148		1411	0	20306	21717	4	0.065	0	2.835			2		1						241.623	0.171			-0.885961	0.0389424		TCONS_00007800	XLOC_006006
AK016085	ncRNA		AK133594	-123						AK017822		667	0	1761	2428	1	0.275	0	1.499							uc008jyx.1		AK016085	Mus musculus adult male testis cDNA, RIKEN full-length enriched library, clone:4930550G17 product:unclassifiable, full insert sequence.	56.512	0.085			-0.50259	0.107672		TCONS_00015290	XLOC_011818
AK016087	ncRNA	TRUE										688	0	722	1410	1	0.488	0	1.453					1	2					263.542	0.383			-0.9303	0.02163	-476.381	TCONS_00016544	XLOC_012796
AK016092	ncRNA	TRUE										1209	0	0	1210	0	1	0	0	1		4		1						133.787	0.111			-0.928199	0.0505377		TCONS_00003089	XLOC_002490
AK016094	ncRNA	TRUE										976	0	8255	9231	1	0.106	0	1.025			3		1						62.171	0.064			-1.21244	0.0265867		TCONS_00011204	XLOC_008643
AK016095	ncRNA	TRUE							Belgard_TCONS_02150087			700	0	1637	2337	2	0.3	0	2.857			1			1					30.663	0.044			-1.0741	0.0664264	-34.4107	TCONS_00020127	XLOC_015621
AK016096	ncRNA		AK015354	-82					NM_181848			1065	0	2789	3854	1	0.276	0	0.939	1										67.473	0.063			-1.19213	0.0307749		TCONS_00014880	XLOC_011492
AK016097	ncRNA		BC145684	-249					AK153403	Guttman10_novel_lincs_TCONS_00001235		622	0	3390	4012	1	0.155	0	1.608			2		1	1	uc007zgs.1		AK016097	Mus musculus adult male testis cDNA, RIKEN full-length enriched library, clone:4930552F14 product:unclassifiable, full insert sequence.	162.753	0.262			-1.00273	0.0229948		TCONS_00011017	XLOC_008507
AK016100	ncRNA	TRUE										793	0	81730	82523	2	0.01	0	2.522			1		1	1	uc007ilo.1		AK016100	Mus musculus adult male testis cDNA, RIKEN full-length enriched library, clone:4930553C11 product:unclassifiable, full insert sequence.	21.169	0.027			-1.23329	0.045566		TCONS_00004473	XLOC_003628
AK016105	ncRNA		NM_021311	-216					BC066846	BC151101	AB032604,AF438405,BC129857,BC129858,NM_021311	670	0	0	670	0	1	0	0					2	1					97.77	0.146			-1.31191	0.0350252	-69.3118	TCONS_00022145	XLOC_017263
AK016106	ncRNA						BC148361,BC152995,NM_175155,AJ507736,AK149872,AK049453	AJ507736				580	0	0	580	0	1	0	0			1								35.928	0.062			-0.978577	0.0767927	-335.534	TCONS_00002707	XLOC_002177
AK016107	ncRNA								X16671.2			726	0	21048	21774	3	0.033	0	4.132						2	uc012ahv.1		AK016107	Mus musculus adult male testis cDNA, RIKEN full-length enriched library, clone:4930553J12 product:weakly similar to PUTATIVE KERATIN-ASSOCIATED PROTEIN (KERATIN-ASSOCIATED PROTEIN 13) [Mus musculus], full insert sequence.	74.454	0.103			1.52865	0.0559929	-44.4221	TCONS_00011220	XLOC_008655
AK016111	ncRNA		NM_001252456	-504					BC052462		BC054077,NM_001252456	1048	0	0	1048	0	1	0	0											146.428	0.14			-1.04559	0.0517271	-24.5168	TCONS_00012133	XLOC_009417
AK016112	ncRNA	TRUE										1632	0	3317	4960	1	0.331	0	0.613	2		1		1						267.419	0.164			-1.14047	0.0875195		TCONS_00022956	XLOC_017885
AK016113	ncRNA	TRUE									AK041243,AK154484,AK171617,NM_172884	943	0	0	944	0	1	0	0					1						42.921	0.046			-1.27599	0.0942975		TCONS_00021124	XLOC_016439
AK016116	ncRNA									AK157939		946	0	0	946	0	1	0	0					3	2					30.563	0.032			-1.08148	0.0243256		TCONS_00016127	XLOC_012462
AK016117	ncRNA				AK210022	497	AK147912	AK147912	AK220359			552	0	0	552	0	1	0	0			1		1	3					38.995	0.071			-1.15096	0.012141		TCONS_00028112	XLOC_021945
AK016118	ncRNA	TRUE									AK136584,AK167630,AY074932,BC014734,NM_133867	686	0	0	686	0	1	0	0			1		2	1					12.293	0.018			-1.05585	0.0272116		TCONS_00017756	XLOC_013742
AK016119	ncRNA	TRUE										1603	0	105336	106939	3	0.015	0	1.871			4		1	2					70.527	0.044				0.0481731		TCONS_00004306	XLOC_003490
AK016120	ncRNA	TRUE										587	0	240	827	1	0.71	0	1.704			2			1	uc008gys.1		AK016120	Mus musculus adult male testis cDNA, RIKEN full-length enriched library, clone:4930554I06 product:unclassifiable, full insert sequence.	48.41	0.082			-1.20194	0.0337055		TCONS_00014083	XLOC_010885
AK016122	ncRNA	TRUE										413	0	48107	48520	1	0.009	0	2.421					1	1					68.423	0.166			-1.12511	0.0522391		TCONS_00029381	XLOC_022965
AK016124	ncRNA	TRUE										1008	0	0	1008	0	1	0	0					1	1					18.339	0.018			-1.38974	0.0451773	-121.788	TCONS_00023351	XLOC_018197
AK016126	ncRNA	TRUE										894	0	745	1639	1	0.545	0	1.119			1		1	1	uc012czk.1		AK016126	Mus musculus adult male testis cDNA, RIKEN full-length enriched library, clone:4930555A03 product:unclassifiable, full insert sequence.	77.075	0.086			-1.01398	0.0170463		TCONS_00017983	XLOC_013926
AK016128	ncRNA	TRUE										717	0	130355	131072	6	0.005	0	8.368			2				uc009lrw.1		AK016128	Mus musculus adult male testis cDNA, RIKEN full-length enriched library, clone:4930555F03 product:hypothetical protein, full insert sequence.	83.236	0.116			4.56333	0.270377	-54.8242	TCONS_00025934	XLOC_020254
AK016129	ncRNA									NM_029685		750	0	7731	8481	3	0.088	0	4					1		uc007gqr.1		AK016129	Mus musculus adult male testis cDNA, RIKEN full-length enriched library, clone:4930555G07 product:unclassifiable, full insert sequence.	96.607	0.129				0.0258308		TCONS_00002414	XLOC_001931
AK016130	ncRNA	TRUE										537	0	959	1496	2	0.359	0	3.724											248.191	0.462			-1.25031	0.0561149		TCONS_00006943	XLOC_005413
AK016131	ncRNA		AK161281	-317								515	0	1181	1696	1	0.304	0	1.942			1		1		uc007nku.1		AK016131	Mus musculus adult male testis cDNA, RIKEN full-length enriched library, clone:4930555J06 product:unclassifiable, full insert sequence.	6.937	0.013			1.29206	0.116067	-39.2688	TCONS_00005363	XLOC_004317
AK016132	ncRNA	TRUE										542	0	22466	23008	2	0.024	0	3.69					1	1					39.659	0.073			-0.817139	0.0658838	-42.9484	TCONS_00008009	XLOC_006087
AK016136	ncRNA									AK005748		668	0	296	964	1	0.693	0	1.497											21.191	0.032			-1.00912	0.0375983	6.4227	TCONS_00004431	XLOC_003590
AK016139	ncRNA	TRUE	AK015366	-300								1143	0	0	1143	0	1	0	0			1								79.09	0.069				0.0243422		TCONS_00012422	XLOC_009660
AK016144	ncRNA	TRUE										1675	0	0	1675	0	1	0	0	3		1		1	3					170.418	0.102			-1.30564	0.0624604		TCONS_00005705	XLOC_004609
AK016146	ncRNA								NM_028096			557	0	554	1111	1	0.501	0	1.795			1								31.534	0.057			-0.933975	0.0539596	-49.0255	TCONS_00000114	XLOC_000104
AK016151	ncRNA		NM_029152	-93								2018	0	34499	36518	3	0.055	0	1.487					2	2					250.191	0.124			-1.09705	0.0919438	2.8794	TCONS_00006100	XLOC_004817
AK016153	ncRNA		AK132749	-91								1033	0	28758	29792	4	0.035	0	3.872											120.414	0.117			-0.689363	0.0401179		TCONS_00003969	XLOC_003220
AK016157	ncRNA								NM_172884			381	0	0	381	0	1	0	0											111.627	0.293			-1.05305	0.126658	-271.522	TCONS_00021123	XLOC_016438
AK016158	ncRNA		NM_001025607	-101								901	0	19152	20053	5	0.045	0	5.549											33.386	0.037			-1.15427	0.0164186		TCONS_00028896	XLOC_022569
AK016160	ncRNA	TRUE										441	0	42990	43431	3	0.01	0	6.803			1								128.572	0.292			-1.07476	0.0912329		TCONS_00009570	XLOC_007346
AK016161	ncRNA	TRUE	AK016358	-124								630	0	36567	37197	1	0.017	0	1.587					1						79.465	0.126			-1.10746	0.0822476	-9.0742	TCONS_00007569	XLOC_005827
AK016162	ncRNA								AF170303			1250	0	16180	17430	6	0.072	0	4.8							uc008qtk.1		AK016162	Mus musculus adult male testis cDNA, RIKEN full-length enriched library, clone:4930557G23 product:homeodomain interacting protein kinase 1, full insert sequence.	696.881	0.558			-0.509655	0.291203		TCONS_00017733	XLOC_013722
AK016163	ncRNA	TRUE										504	0	2895	3399	1	0.148	0	1.984			2			2	uc007zua.1		AK016163	Mus musculus adult male testis cDNA, RIKEN full-length enriched library, clone:4930557I16 product:unclassifiable, full insert sequence.	97.965	0.194			-1.03297	0.0558345	-362.854	TCONS_00011706	XLOC_009076
AK016175	ncRNA		AK043431	-731					AB041595			1179	0	141717	142899	4	0.008	0	3.393			1								253.658	0.215			-1.23175	0.21266		TCONS_00021289	XLOC_016574
AK016182	ncRNA	TRUE										645	0	27717	28362	3	0.023	0	4.651					1	1					171.044	0.265			-1.0805	0.030319		TCONS_00006401	XLOC_005057
AK016186	ncRNA		AK177436	311					AK167135	BC071183	AK078811,AK080630,AK087074,AK142240,AK150434,AK158048,AK158249,AK158250,AK167192,AK171378,BC006689,NM_145586	1589	0	0	1595	0	1	0	0			2		1	1					28.735	0.018			-1.04005	0.138255	106.552	TCONS_00025527	XLOC_019922
AK016187	ncRNA									BC011219		728	0	1389	2118	1	0.344	0	1.374					1	1					47.039	0.065			-0.572888	0.214703		TCONS_00022052	XLOC_017192
AK016189	ncRNA								NM_007730			1747	0	382	2132	1	0.821	0	0.572			3		1	1					859.899	0.492			-0.898183	0.131537	-4.9212	TCONS_00027724	XLOC_021624
AK016192	ncRNA	TRUE										664	0	30327	30991	3	0.021	0	4.518			1				uc007ddy.1		AK016192	Mus musculus adult male testis cDNA, RIKEN full-length enriched library, clone:4930562F17 product:unclassifiable, full insert sequence.	206.72	0.311			1.50835	0.0635091	-244.468	TCONS_00000755	XLOC_000550
AK016193	ncRNA						AF536978,NM_011056,BC132109,BC132107,AF038896,EU489880,AY388962,DQ665894	NM_011056				649	0	0	649	0	1	0	0					1						10.514	0.016			-1.27925	0.0286603		TCONS_00007417	XLOC_005700
AK016204	ncRNA	TRUE										1221	0	0	1234	0	1	0	0			1		1						58.966	0.048			-1.09866	0.0450773	-175.508	TCONS_00019605	XLOC_015163
AK016206	ncRNA						L35549	L35549		L35549		628	0	12373	13001	2	0.048	0	3.185			2								56.372	0.09			-1.05483	0.0858085		TCONS_00023519	XLOC_018335
AK016207	ncRNA		AK051437	-682					AK016508			962	0	7606	8568	1	0.112	0	1.04			1		1		uc007uew.1		AK016207	Mus musculus adult male testis cDNA, RIKEN full-length enriched library, clone:4930539J01 product:unclassifiable, full insert sequence.	46.374	0.048			1.53781	0.256096	-68.0364	TCONS_00008579	XLOC_006542
AK016208	ncRNA		AK133396	-82								574	0	2170	2744	1	0.209	0	1.742						1					15.44	0.027				0.100195		TCONS_00003057	XLOC_002463
AK016211	ncRNA									X14799		1042	0	0	1042	0	1	0	0			1		1	1					189.709	0.182			-1.28601	0.0415736		TCONS_00008268	XLOC_006279
AK016215	ncRNA	TRUE	NR_036593	-165								1534	0	0	1538	0	1	0	0			1								62.22	0.041			-1.08093	0.0696629	-19.4276	TCONS_00005744	XLOC_004640
AK016225	ncRNA								AK165726			1272	0	1462	2734	2	0.465	0	1.572			2		1		uc009cia.1		AK016225	Mus musculus adult male testis cDNA, RIKEN full-length enriched library, clone:4930565C19 product:unclassifiable, full insert sequence.	96.678	0.076			-1.15777	0.0516215		TCONS_00023617	XLOC_018416
AK016229	ncRNA								AK147503			1009	0	32373	33382	4	0.03	0	3.964			1								98.62	0.098			-0.968883	0.159615	-2.3343	TCONS_00001439	XLOC_001108
AK016233	ncRNA								BC072593			1040	0	12192	13232	4	0.079	0	3.846			2		1	1					101.003	0.097			-1.26172	0.0619047	-40.9524	TCONS_00026509	XLOC_020598
AK016234	ncRNA		BC096466	412						AK139794		1534	0	7012	8547	1	0.18	0	0.652			4		1	1					102.762	0.067			0.0580712	0.0211133		TCONS_00021571	XLOC_016813
AK016235	ncRNA								NM_021447	AK195721		956	0	631	1588	2	0.603	0	2.092					1	1					412.054	0.431			-0.867143	0.0214565		TCONS_00021566	XLOC_016808
AK016238	ncRNA		AK030097	-696					AK170184		AK030097,NM_178893	779	0	0	779	0	1	0	0						1					105.534	0.135			-1.08363	0.0509868	-47.9519	TCONS_00019119	XLOC_014762
AK016240	ncRNA	TRUE										616	0	5835	6451	2	0.095	0	3.247			2								89.924	0.146			-1.18512	0.0553516		TCONS_00026513	XLOC_020599
AK016242	ncRNA								NM_011807			1280	0	26025	27306	6	0.047	0	4.688			3		1						89.516	0.07			-1.23956	0.0112127		TCONS_00025393	XLOC_019808
AK016243	ncRNA		AK017036	-26								754	0	3418	4172	1	0.181	0	1.326			1		1	1	uc009jad.1		AK016243	Mus musculus adult male testis cDNA, RIKEN full-length enriched library, clone:4930458B22 product:unclassifiable, full insert sequence.	41.084	0.054			-1.07418	0.0359645		TCONS_00025461	XLOC_019869
AK016244	ncRNA											718	0	7519	8237	4	0.087	0	5.571					1		uc007aou.1		AK016244	Mus musculus adult male testis cDNA, RIKEN full-length enriched library, clone:4930568A12 product:unclassifiable, full insert sequence.	79.662	0.111			-0.90126	0.0102422		TCONS_00001157	XLOC_000856
AK016245	ncRNA											1059	0	59172	60231	2	0.018	0	1.889	1		4		1	1					41.121	0.039			-0.964988	0.0633282		TCONS_00021474	XLOC_016728
AK016246	ncRNA		NM_016789	-128							AF049124,AK134806,BC026054,NM_016789	868	0	0	868	0	1	0	0			1								56.839	0.065			3.52964	0.132568	-137.935	TCONS_00022287	XLOC_017380
AK016249	ncRNA		NM_183150	-100							NM_183150	647	0	0	647	0	1	0	0			1								51.442	0.08				0.122029		TCONS_00012409	XLOC_009650
AK016250	ncRNA		AK002793	382	NM_172691	27						1273	0	210	1484	1	0.858	0	0.786			1								375.364	0.295			-1.07536	0.0280882	-160.462	TCONS_00019077	XLOC_014727
AK016251	ncRNA	TRUE										3591	0	24316	27907	4	0.129	0	1.114	2		6		1		uc007div.1		AK016251	Mus musculus adult male testis cDNA, RIKEN full-length enriched library, clone:4930568G15 product:hypothetical protein, full insert sequence.	232.999	0.065			-1.01366	0.0738596		TCONS_00001765	XLOC_001385
AK016256	ncRNA		AK047134	224							AK007626,AK008215,AK046524,BC027506,NM_025563	674	0	0	674	0	1	0	0			1		1	1					199.122	0.295			-1.08832	0.371438	134.467	TCONS_00014753	XLOC_011395
AK016261	ncRNA								U90331			1221	0	28307	29528	3	0.041	0	2.457			2		1	2					23.323	0.019			-1.15349	0.0277773	11.9059	TCONS_00010192	XLOC_007836
AK016262	ncRNA	TRUE							M64837			1246	0	0	1247	0	1	0	0					2	2					60.215	0.048			-1.11283	0.0782551	-28.322	TCONS_00025661	XLOC_020032
AK016265	ncRNA		NM_001039094	-47								1045	0	13949	14994	3	0.07	0	2.871					2	1	uc008ruy.1		AK016265	Mus musculus adult male testis cDNA, RIKEN full-length enriched library, clone:4930570G19 product:unclassifiable, full insert sequence.	77.79	0.074			-1.30176	0.0695897		TCONS_00018887	XLOC_014575
AK016276	ncRNA		AK003614	-502						BC138864		608	0	19475	20083	3	0.03	0	4.934						1	uc009ony.1		AK016276	Mus musculus adult male testis cDNA, RIKEN full-length enriched library, clone:4930572C02 product:acid phosphatase 5, tartrate resistant, full insert sequence.	57.688	0.095			-1.04471	0.112259		TCONS_00027335	XLOC_021293
AK016277	ncRNA						AK085367,NM_001163262,BC158118	AK085367				1521	0	0	1529	0	1	0	0			1		1	3					317.462	0.209				0.0554164		TCONS_00026306	XLOC_020548
AK016278	ncRNA	TRUE										832	0	1631	2463	1	0.338	0	1.202											17.62	0.021			2.19873	0.210072		TCONS_00008508	XLOC_006485
AK016280	ncRNA	TRUE										1314	0	101285	102599	8	0.013	0	6.088							uc008eud.1		AK016280	Mus musculus adult male testis cDNA, RIKEN full-length enriched library, clone:4930572J10 product:unclassifiable, full insert sequence.	291.278	0.222			-0.882082	0.191206		TCONS_00013632	XLOC_010582
AK016283	ncRNA											1517	0	28670	30187	2	0.05	0	1.318			3				uc007rlh.1		AK016283	Mus musculus adult male testis cDNA, RIKEN full-length enriched library, clone:4930572N12 product:unclassifiable, full insert sequence.	265.471	0.175			-0.890529	0.0352455		TCONS_00007292	XLOC_005600
AK016285	ncRNA	TRUE										619	0	0	619	0	1	0	0						1					15.41	0.025			-0.718771	0.167764	8.0155	TCONS_00011186	XLOC_008626
AK016287	ncRNA	TRUE										1069	0	0	1069	0	1	0	0	1		3													0.12779		TCONS_00010386	XLOC_008008
AK016288	ncRNA	TRUE										704	0	98	802	1	0.878	0	1.42					1	3					11.994	0.017			-0.964179	0.0165479		TCONS_00021356	XLOC_016629
AK016289	ncRNA								AK029782			1167	0	0	1167	0	1	0	0			2								148.132	0.127			-1.28812	0.0117874		TCONS_00002003	XLOC_001582
AK016291	ncRNA											906	0	45224	46130	3	0.02	0	3.311					3	5					47.327	0.052			-1.00097	0.248076		TCONS_00018556	XLOC_014312
AK016293	ncRNA	TRUE										1567	0	0	1569	0	1	0	0			2												-0.892735	0.027188		TCONS_00018908	XLOC_014588
AK016308	ncRNA	TRUE	BC083165	-157								552	0	424	976	1	0.566	0	1.812					1						94.262	0.171			-0.957525	0.0505003	-129.164	TCONS_00027131	XLOC_021121
AK016314	ncRNA	TRUE										1482	0	1298	2785	1	0.534	0	0.675			2		1						46.036	0.031			-1.26577	0.0168236		TCONS_00012308	XLOC_009571
AK016315	ncRNA	TRUE										469	0	1075	1544	1	0.304	0	2.132											25.415	0.054			-1.06164	0.0699744	-3.3058	TCONS_00024089	XLOC_018807
AK016323	ncRNA								NM_008481			1502	0	5844	7360	4	0.206	0	2.663			3		1	2					54.743	0.036			-1.2645	0.047856		TCONS_00002084	XLOC_001645
AK016326	ncRNA								AK041210			852	0	702	1554	3	0.548	0	3.521					2	2					9.487	0.011			-1.08702	0.108535		TCONS_00007685	XLOC_005909
AK016327	ncRNA								AK146406.2	NM_008482	AK014092,AK117104,AK135807,AK136193,AK153399,AK167885,AK168157,AK168875,BC003368,NM_007861,U73445	1153	0	0	1154	0	1	0	0			1		1	1					101.559	0.088				0.550658	-337.94	TCONS_00005313	XLOC_004271
AK016328	ncRNA		AK132856	484					BC049076			942	0	3762	4704	2	0.2	0	2.123							uc008vdo.1		AK016328	Mus musculus adult male testis cDNA, RIKEN full-length enriched library, clone:4930579K13 product:ribosomal protein S6 kinase polypeptide 1, full insert sequence.	230.973	0.245			-0.933525	0.0538648	-209.605	TCONS_00019572	XLOC_015136
AK016330	ncRNA								AK046881			933	0	10440	11373	3	0.082	0	3.215					1						72.521	0.078			-1.30981	0.0755845		TCONS_00026784	XLOC_020830
AK016331	ncRNA								AK172564			598	0	584	1183	1	0.506	0	1.672			1								8.616	0.014			-0.99272	0.120084	-294.789	TCONS_00026982	XLOC_021009
AK016332	ncRNA	TRUE										760	0	2854	3614	2	0.21	0	2.632			2				uc009nyg.1		4930567H12Rik	Mus musculus adult male testis cDNA, RIKEN full-length enriched library, clone:4930567H12 product:unclassifiable, full insert sequence.	29.303	0.039			-1.14833	0.0666087		TCONS_00026510	XLOC_020599
AK016333	ncRNA	TRUE	NR_045345	-75								1227	0	9281	10508	2	0.117	0	1.63			1		1	1					33.569	0.027			-1.09826	0.0146967		TCONS_00002562	XLOC_002063
AK016335	ncRNA		AK147116	-140								687	0	4377	5064	1	0.136	0	1.456			1			1	uc008mbe.1		AK016335	Mus musculus adult male testis cDNA, RIKEN full-length enriched library, clone:4930580A09 product:unclassifiable, full insert sequence.	24.659	0.036			-1.15625	0.104635		TCONS_00016834	XLOC_013025
AK016337	ncRNA	TRUE							AK017143			690	0	803	1493	1	0.462	0	1.449						1					46.167	0.067				0.0693868		TCONS_00020616	XLOC_016025
AK016344	ncRNA	TRUE										1048	0	0	1048	0	1	0	0			4								106.053	0.101			-0.989995	0.0308427	-39.409	TCONS_00023706	XLOC_018488
AK016348	ncRNA						AK016526	AK016526				981	0	0	981	0	1	0	0					1	1					34.156	0.035			-1.01178	0.109247	-53.8058	TCONS_00028064	XLOC_021905
AK016349	ncRNA	TRUE										802	0	32443	33245	3	0.024	0	3.741			2		1		uc008wth.2		4930584F24Rik	Mus musculus adult male testis cDNA, RIKEN full-length enriched library, clone:1700001J09 product:unclassifiable, full insert sequence.	37.865	0.047			4.05596	0.13926		TCONS_00021545	XLOC_016791
AK016350	ncRNA	TRUE										1078	0	32267	33345	3	0.032	0	2.783			2		1						72.467	0.067			-1.23932	0.0319965		TCONS_00007474	XLOC_005748
AK016356	ncRNA						U58494.4	U58494.4	NM_007834	U58494.4		712	0	0	712	0	1	0	0			1		1	1					22.597	0.032			-1.13608	0.069596	-70.4752	TCONS_00011263	XLOC_008689
AK016357	ncRNA								AK132387	AK161448		806	0	0	806	0	1	0	0					1	1					226.792	0.281				0.239882	143.043	TCONS_00002554	XLOC_002056
AK016358	ncRNA		AK016161	-124								877	0	71394	72275	3	0.012	0	3.421			1		1						71.426	0.081			-1.09474	0.071275		TCONS_00006776	XLOC_005281
AK016360	ncRNA	TRUE										847	0	3356	4207	1	0.202	0	1.181			3		2						19.422	0.023			-1.08741	0.0362851		TCONS_00001291	XLOC_000974
AK016361	ncRNA		AK140747	-745					NM_008779			829	0	69746	70575	4	0.012	0	4.825			1		1	1	uc009dci.1		AK016361	Mus musculus adult male testis cDNA, RIKEN full-length enriched library, clone:4930523E13 product:unclassifiable, full insert sequence.	54.533	0.066			-0.955725	0.0553436	-228.006	TCONS_00023036	XLOC_017949
AK016363	ncRNA				AK016724	-336						902	0	139764	140666	3	0.006	0	3.326						1					71.719	0.08			-0.862374	0.0415295		TCONS_00013631	XLOC_010582
AK016366	ncRNA		BC147563	44								1474	0	4133	5607	3	0.263	0	2.035			1		1	1					129.013	0.088			-1.12397	0.10379	-12.6458	TCONS_00024752	XLOC_019348
AK016367	ncRNA								NM_001164593			1729	0	1316	3070	1	0.571	0	0.578			4			1					369.781	0.214				0.0652645	-88.138	TCONS_00010556	XLOC_008140
AK016372	ncRNA								AK018360			522	0	16463	16985	3	0.031	0	5.747					1		uc009sdj.1		AK016372	Mus musculus adult male testis cDNA, RIKEN full-length enriched library, clone:4930589B17 product:unclassifiable, full insert sequence.	30.051	0.058			-0.641593	0.102828		TCONS_00027974	XLOC_021830
AK016373	ncRNA	TRUE							AK135955			404	0	5795	6199	1	0.065	0	2.475					1	1					15.493	0.038			-1.2591	0.0185114		TCONS_00007999	XLOC_006080
AK016377	ncRNA								AK133667			1024	0	41960	42984	5	0.024	0	4.883			1		1	1	uc007zut.1		AK016377	Mus musculus adult male testis cDNA, RIKEN full-length enriched library, clone:4930590A17 product:unclassifiable, full insert sequence.	97.052	0.095				0.169481		TCONS_00011217	XLOC_008653
AK016378	ncRNA	TRUE	NM_027749	-38					AK135613.3			546	0	2545	3091	1	0.177	0	1.832					1	2					48.431	0.089			-1.28144	0.0359966		TCONS_00022784	XLOC_017752
AK016379	ncRNA	TRUE										548	0	0	548	0	1	0	0					1						21.11	0.039			-1.22108	0.0748595	-52.1651	TCONS_00027714	XLOC_021614
AK016381	ncRNA	TRUE										825	0	536	1362	1	0.606	0	1.212	2		1		1						7.362	0.009			-1.15449	0.0285738	-423.658	TCONS_00017922	XLOC_013878
AK016383	ncRNA	TRUE										480	0	5644	6124	2	0.078	0	4.167			1				uc007evj.1		AK016383	Mus musculus adult male testis cDNA, RIKEN full-length enriched library, clone:4930591E09 product:unclassifiable, full insert sequence.	10.241	0.021			-1.22861	0.00687514		TCONS_00002131	XLOC_001686
AK016386	ncRNA								NM_183033			372	0	249	621	1	0.599	0	2.688						1	uc008fue.2		4930592I03Rik	Mus musculus adult male testis cDNA, RIKEN full-length enriched library, clone:4930592I03 product:unclassifiable, full insert sequence.	31.878	0.086	TRUE		-1.07369	0.0289405		TCONS_00013901	XLOC_010784
AK016388	ncRNA		AK149316	-170								975	0	94999	95974	7	0.01	0	7.179			1		2	1	uc008pib.1		AK016388	Mus musculus adult male testis cDNA, RIKEN full-length enriched library, clone:4930593A02 product:unclassifiable, full insert sequence.	116.784	0.12			-1.16298	0.0391623		TCONS_00017490	XLOC_013528
AK016390	ncRNA		NR_045158	-62						BC132294		602	0	3157	3759	1	0.16	0	1.661	1				3	4					28.796	0.048			-1.23579	0.0169076		TCONS_00002205	XLOC_001752
AK016392	ncRNA	TRUE										1030	0	8830	9860	1	0.104	0	0.971			3								17.567	0.017			-1.1223	0.014474		TCONS_00013893	XLOC_010777
AK016393	ncRNA	TRUE										629	0	275	904	2	0.696	0	3.18					1		uc008paw.1		AK016393	Mus musculus adult male testis cDNA, RIKEN full-length enriched library, clone:4930594O21 product:unclassifiable, full insert sequence.	21.428	0.034			-0.937915	0.091397	-48.8842	TCONS_00017416	XLOC_013466
AK016395	ncRNA	TRUE										607	0	0	607	0	1	0	0			3		1						12.948	0.021			-1.04543	0.0391826	-11.1385	TCONS_00023866	XLOC_018620
AK016397	ncRNA		AK006281	137						NM_027266	AK006281,AK012689,BC023669,BC054085,NM_025513	1529	0	0	1537	0	1	0	0			1		5	6					319.786	0.209				0.0208852		TCONS_00019108	XLOC_014753
AK016399	ncRNA								AK018360			749	0	26510	27259	3	0.027	0	4.005					1		uc009sdk.1		AK016399	Mus musculus adult male testis cDNA, RIKEN full-length enriched library, clone:4930589B17 product:unclassifiable, full insert sequence.	52.597	0.07			-0.74111	0.10245		TCONS_00027975	XLOC_021830
AK016402	ncRNA									AK014408		698	0	4215	4913	3	0.142	0	4.298	1				1						18.261	0.026			-0.814053	0.120566	-30.6917	TCONS_00003622	XLOC_002928
AK016404	ncRNA								BC059814			806	0	0	809	0	1	0	0	1				1						76.786	0.095			-1.08866	0.0367829		TCONS_00012313	XLOC_009575
AK016406	ncRNA	TRUE										738	0	0	739	0	1	0	0					1						58.412	0.079			-1.29201	0.0330618		TCONS_00007570	XLOC_005828
AK016409	ncRNA		NM_010281	-487								628	0	8091	8719	2	0.072	0	3.185			1		1	1					78.606	0.125			-0.846695	0.0341103		TCONS_00019788	XLOC_015325
AK016412	ncRNA	TRUE										873	0	22833	23706	3	0.037	0	3.436			1		1	1	uc007ejd.1		AK016412	Mus musculus adult male testis cDNA, RIKEN full-length enriched library, clone:4930598N05 product:unclassifiable, full insert sequence.	27.985	0.032			-1.22404	0.0836079	-64.907	TCONS_00002012	XLOC_001588
AK016413	ncRNA	TRUE										387	0	4000	4387	1	0.088	0	2.584					1		uc007cko.1		AK016413	Mus musculus adult male testis cDNA, RIKEN full-length enriched library, clone:4930599A14 product:unclassifiable, full insert sequence.	5.029	0.013			-1.13475	0.0282185		TCONS_00001559	XLOC_001208
AK016418	ncRNA								AK146387			1003	0	0	1003	0	1	0	0	1		1		1						72.201	0.072			-1.1339	0.0109781		TCONS_00018805	XLOC_014503
AK016424	ncRNA									FJ387503		1755	0	3168	4926	2	0.357	0	1.14											310.344	0.177	TRUE		-0.961624	0.0244845	-25.533	TCONS_00018487	XLOC_014262
AK016433	ncRNA		AK163891	441					BC111809			1790	0	115	1907	1	0.94	0	0.559	1		1		2	1					267.73	0.15			-1.13294	0.0700483		TCONS_00003966	XLOC_003217
AK016435	ncRNA		NM_026110	-276								1252	0	10770	12022	1	0.104	0	0.799											313.152	0.25			-0.813722	0.353874	45.4746	TCONS_00011233	XLOC_008663
AK016439	ncRNA	TRUE										1779	0	328	2107	1	0.844	0	0.562	2				1	1					92.075	0.052			-1.21771	0.0375015		TCONS_00021401	XLOC_016666
AK016440	ncRNA	TRUE										1164	0	19973	21137	1	0.055	0	0.859					3	3					54.891	0.047			-1.10001	0.111205	18.6379	TCONS_00008918	XLOC_006818
AK016442	ncRNA						NM_010199,BC030485,AF020739	BC030485				1473	0	0	1473	0	1	0	0			4			1					247.872	0.168			-0.893818	0.0920191	-281.742	TCONS_00011402	XLOC_008817
AK016446	ncRNA									AK136208		1164	0	0	1164	0	1	0	0			3		1	1					73.578	0.063			-1.01607	0.0774188	-69.2105	TCONS_00019350	XLOC_014954
AK016451	ncRNA								NM_011807			1448	0	0	1448	0	1	0	0			3		2	1					91.14	0.063			-1.21678	0.0136665		TCONS_00025392	XLOC_019807
AK016453	ncRNA								M73959			763	0	1621	2385	1	0.32	0	1.311						1					132.069	0.173			-0.842142	0.0463313		TCONS_00012483	XLOC_009709
AK016455	ncRNA								AK152089			1280	0	3825	5107	1	0.251	0	0.781											282.856	0.221			-1.08039	0.163457	-29.3535	TCONS_00004748	XLOC_003817
AK016462	ncRNA									AK040729		599	0	0	599	0	1	0	0					1						57.579	0.096			-1.09216	0.0387071		TCONS_00004087	XLOC_003310
AK016472	ncRNA		BC010212	464								915	0	1565	2480	1	0.369	0	1.093											242.363	0.265			-1.12974	0.14392	59.1427	TCONS_00016690	XLOC_012918
AK016478	ncRNA	TRUE										1851	0	0	1851	0	1	0	0	1		4								63.691	0.034			-1.11075	0.0514266		TCONS_00000412	XLOC_000350
AK016486	ncRNA		D83528	69	NM_144814	831						1161	0	6098	7259	3	0.16	0	2.584					1		uc011wyw.1		AK016486	Mus musculus adult male testis cDNA, RIKEN full-length enriched library, clone:4931429D24 product:Tnf receptor-associated factor 5, full insert sequence.	354.332	0.305			-1.09981	0.0639377		TCONS_00000959	XLOC_000705
AK016489	ncRNA		AK206294	107					AK148434	GU266552		1452	0	0	1455	0	1	0	0					1	1					166.522	0.115			-0.660614	0.355134		TCONS_00013979	XLOC_010832
AK016494	ncRNA								AK132915	NM_009943		1135	0	97	1232	1	0.921	0	0.881	1				2	3					151.361	0.133			-1.14909	0.106273		TCONS_00025599	XLOC_019978
AK016500	ncRNA						AB008907,BC107004,AK035974,NM_207667,BC107003,AK079100	AK079100				1856	0	0	1856	0	1	0	0			4												4.40303	0.0982216		TCONS_00009510	XLOC_007294
AK016503	ncRNA											1902	0	97850	99752	3	0.019	0	1.577					1	1					496.538	0.261			-1.03162	0.158503		TCONS_00008481	XLOC_006463
AK016507	ncRNA								NM_207651			2954	0	610	3564	1	0.829	0	0.339			5		1	1					478.754	0.162				0.0530406	-39.3449	TCONS_00013411	XLOC_010408
AK016518	ncRNA								NM_031174			3133	0	46976	50109	4	0.063	0	1.277			2		1						408.257	0.13			-0.926655	0.331902		TCONS_00011273	XLOC_008699
AK016528	ncRNA		AK029447	385					D90173			3056	0	0	3057	0	1	0	0	1		9		1						1259.46	0.412			-0.986905	0.0806232		TCONS_00020140	XLOC_015632
AK016536	ncRNA	TRUE										3315	0	0	3315	0	1	0	0			4								529.247	0.16			-0.069293	0.116578		TCONS_00006095	XLOC_004813
AK016537	ncRNA									AK133059		3452	0	0	3452	0	1	0	0			6		1						541.559	0.157				0.0857461		TCONS_00019771	XLOC_015309
AK016541	ncRNA	TRUE										3482	0	0	3484	0	1	0	0			2		1	1					359.348	0.103			-0.675003	0.102364	8.7412	TCONS_00027516	XLOC_021440
AK016545	ncRNA	TRUE										3451	0	0	3452	0	1	0	0	1		1		1	1					317.571	0.092	TRUE		-0.960648	0.643985		TCONS_00016023	XLOC_012378
AK016552	ncRNA								AK139798	AJ250693		2599	0	0	2599	0	1	0	0			1		2	2					169.829	0.065			-0.999596	0.0638175		TCONS_00024832	XLOC_019416
AK016564	ncRNA		AK180460	-548					AK031371		AK180460	2438	0	0	2438	0	1	0	0	1		5		2	1					556.696	0.228			-1.23479	0.145734		TCONS_00005751	XLOC_004646
AK016576	ncRNA		AF464156	-255					NM_001174154			2683	0	13288	15971	2	0.168	0	0.745			4								1650.63	0.615			-1.08849	0.211285	180.925	TCONS_00013590	XLOC_010558
AK016579	ncRNA		NM_026742	-107								3096	0	0	3096	0	1	0	0			2								185.03	0.06			-1.04505	0.0256048		TCONS_00019812	XLOC_015343
AK016580	ncRNA									AK148668		2790	0	5888	8680	1	0.322	0	0.358			2		1						554.424	0.199			-0.467101	0.342545		TCONS_00006786	XLOC_005290
AK016582	ncRNA		AK158753	-191						NM_030238	AK004658,AK077095,AK088975,AK146944,AK147641,AK157849,AK158753,AK161276,AK166696,AK166720,AK166729,AK166847,AK166867,AK166896,AK167008,AK167065,AK167086,AK167114,AK167165,AK167171,AK167188,AK167293,AK168407,AK168605,AK168620,AK183519,AK206401.2,AK207188,AK209765.2,AK217213,BC009003,BC018232,BC046614,BC049124,BC057287,BC094024,J04633,M36830,NM_010480	1145	0	0	1153	0	1	0	0			1			1					204.128	0.178			-1.346	0.0696466	123.228	TCONS_00005947	XLOC_004680
AK016596	ncRNA								AK078216			1910	0	0	1910	0	1	0	0			4		1						520.767	0.273			2.04462	0.00904487		TCONS_00006394	XLOC_005051
AK016602	ncRNA								AK014895			1202	0	5367	6569	3	0.183	0	2.496			3		1	2					70.505	0.059			-1.22697	0.0475865		TCONS_00018802	XLOC_014500
AK016604	ncRNA	TRUE										1070	0	0	1070	0	1	0	0	1		3								64.751	0.061			-1.21697	0.00385595		TCONS_00000001	XLOC_000001
AK016606	ncRNA	TRUE										1336	0	4490	5826	1	0.229	0	0.749			1								29.688	0.022			-0.915275	0.119542		TCONS_00013907	XLOC_010789
AK016609	ncRNA	TRUE										1035	0	2489	3524	1	0.294	0	0.966			1		2	1					50.076	0.048			-1.0601	0.0438982		TCONS_00024154	XLOC_018862
AK016615	ncRNA						AK172915,AY027438,NM_033374,AK037611,AK165765,AK089228,AK089682	NM_033374				1365	0	0	1365	0	1	0	0			2								235.115	0.172			-1.09207	0.0264343	-93.8536	TCONS_00004441	XLOC_003600
AK016636	ncRNA	TRUE										1259	0	1260	2527	1	0.501	0	0.794			3								197.77	0.157			-1.01408	0.133322	-9.461	TCONS_00014234	XLOC_011003
AK016639	ncRNA	TRUE	AK133169	-95								1121	0	0	1121	0	1	0	0	1					1					75.467	0.067			-1.25908	0.0231241	-86.3963	TCONS_00016144	XLOC_012474
AK016650	ncRNA	TRUE										1202	0	5847	7049	1	0.171	0	0.832	1				1	1	uc009glf.1		AK016650	Mus musculus adult male testis cDNA, RIKEN full-length enriched library, clone:4933404I11 product:unclassifiable, full insert sequence.	193.093	0.161			-0.768963	0.0556109	-46.0897	TCONS_00024317	XLOC_018996
AK016653	ncRNA	TRUE										1059	0	5662	6722	1	0.158	0	0.944			2			1					27.312	0.026			-1.15211	0.103504		TCONS_00002179	XLOC_001728
AK016655	ncRNA	TRUE										2271	0	0	2271	0	1	0	0			3		1	1					69.692	0.031			-1.33408	0.0343586		TCONS_00007801	XLOC_006007
AK016661	ncRNA		NM_024461	-280						BC096383		1390	0	57997	59387	6	0.023	0	4.317			1				uc008rew.1		AK016661	Mus musculus adult male testis cDNA, RIKEN full-length enriched library, clone:4933405D12 product:unclassifiable, full insert sequence.	71.215	0.051			-0.842633	0.0806146		TCONS_00018712	XLOC_014435
AK016672	ncRNA											981	0	232857	233838	3	0.004	0	3.058							uc012dsk.1		Speer7-ps1	Mus musculus adult male testis cDNA, RIKEN full-length enriched library, clone:4930568L21 product:unclassifiable, full insert sequence.	16.866	0.017			-0.922515	0.194222		TCONS_00020553	XLOC_015977
AK016679	ncRNA								AK173105			1182	0	12948	14130	1	0.084	0	0.846					1	1					191.501	0.162			-0.964922	0.0688776		TCONS_00006316	XLOC_004988
AK016680	ncRNA	TRUE										1478	0	3024	4502	3	0.328	0	2.03					1	1					62.346	0.042			2.69485	0.0382974		TCONS_00026177	XLOC_020448
AK016682	ncRNA		NM_013635	-155								1457	0	27376	28833	6	0.051	0	4.118					1	1	uc007nig.1		AK016682	Mus musculus adult male testis cDNA, RIKEN full-length enriched library, clone:4933406C10 product:unclassifiable, full insert sequence.	35.678	0.024			-1.11622	0.0230406	-64.3118	TCONS_00006098	XLOC_004815
AK016691	ncRNA	TRUE										1336	0	8584	9920	2	0.135	0	1.497			1		1	1					97.71	0.073			-1.12472	0.0425128		TCONS_00010593	XLOC_008168
AK016696	ncRNA											1505	0	92960	94465	8	0.016	0	5.316			2		1	1	uc009ekg.1		AK016696	Mus musculus adult male testis cDNA, RIKEN full-length enriched library, clone:4933406J09 product:unclassifiable, full insert sequence.	155.433	0.103				0.0650427		TCONS_00024055	XLOC_018774
AK016698	ncRNA	TRUE										1598	0	8714	10312	6	0.155	0	3.755											302.881	0.19			-1.08314	0.0851575	-41.3204	TCONS_00006480	XLOC_005124
AK016703	ncRNA		AK007017	-97					AK007917		AK007017	1503	0	0	1503	0	1	0	0			6			1					3.626	0.002			-1.13858	0.025192		TCONS_00024116	XLOC_018831
AK016706	ncRNA		BC156320	-41							AF513708,BC104316,BC104317,BC125242,BC156320,NM_199143	1109	0	0	1109	0	1	0	0			1								249.938	0.225				0.0493581	-2.3314	TCONS_00023567	XLOC_018375
AK016710	ncRNA	TRUE										2144	0	0	2144	0	1	0	0			3		1	1					39.699	0.019			0.0805561	0.0597952		TCONS_00008421	XLOC_006409
AK016713	ncRNA	TRUE										1126	0	0	1137	0	1	0	0			2		1						64.117	0.057			-0.992144	0.0672956		TCONS_00017150	XLOC_013265
AK016717	ncRNA									AK158547		1251	0	0	1251	0	1	0	0					1						109.601	0.088			-0.842824	0.0754441	-2.2956	TCONS_00009850	XLOC_007560
AK016723	ncRNA	TRUE							AK086943			1560	0	0	1561	0	1	0	0			1		1	1					128.877	0.083			1.37209	0.0787882	-16.2726	TCONS_00027511	XLOC_021436
AK016724	ncRNA								BC026686			1294	0	2124	3418	1	0.379	0	0.773			1		2	2					128.344	0.099			-1.17488	0.0811943	-475.271	TCONS_00013166	XLOC_010217
AK016725	ncRNA				NM_011099	2					AK132182	1436	0	0	1436	0	1	0	0											106.081	0.074			-1.00411	0.102592	-3.2718	TCONS_00028351	XLOC_022134
AK016728	ncRNA	TRUE	AK212818.2	120								721	0	23857	24578	3	0.029	0	4.161							uc012hld.1		4933407K13Rik	Mus musculus adult male testis cDNA, RIKEN full-length enriched library, clone:4933407K13 product:RIKEN cDNA 4933407K13 gene, full insert sequence.	8.048	0.011	TRUE		-1.17867	0.0678057		TCONS_00029683	XLOC_023076
AK016733	ncRNA		AK135533	-466							AK012866,AK034860,AK048900,AK135533,AK146879,AK160943.2,AK171091,BC012849,NM_144802	1466	0	0	1466	0	1	0	0					1						109.146	0.074			-1.23305	0.0469933		TCONS_00012233	XLOC_009505
AK016734	ncRNA		AK016741	-136								716	0	1414	2130	1	0.336	0	1.397			1		1	2	uc008xrt.1		AK016734	Mus musculus adult male testis cDNA, RIKEN full-length enriched library, clone:4933408A14 product:unclassifiable, full insert sequence.	98.881	0.138			-1.27427	0.0138971		TCONS_00020874	XLOC_016229
AK016735	ncRNA	TRUE										1309	0	4345	5661	2	0.232	0	1.528			1								33.047	0.025			-0.919381	0.140548		TCONS_00016074	XLOC_012417
AK016740	ncRNA	TRUE										1454	0	0	1454	0	1	0	0			1								253.536	0.174			-1.33264	0.0109623		TCONS_00018366	XLOC_014158
AK016750	ncRNA									M21977		1557	0	879	2436	1	0.639	0	0.642			1		1						126.412	0.081	TRUE		-1.23349	0.209576		TCONS_00001621	XLOC_001262
AK016752	ncRNA		AK006345	374					AK028643			1124	0	472	1596	1	0.704	0	0.89					1	1	uc011xcy.1		AK016752	Mus musculus adult male testis cDNA, RIKEN full-length enriched library, clone:4930520K10 product:hypothetical protein, full insert sequence.	535.45	0.476			3.1541	0.0135245		TCONS_00002910	XLOC_002341
AK016753	ncRNA	TRUE										1248	0	18932	20181	5	0.062	0	4.006			1		1						168.002	0.135			-1.32213	0.0462323		TCONS_00006071	XLOC_004794
AK016758	ncRNA								NM_008905	BC107238		778	0	3895	4673	1	0.166	0	1.285			1		2	2					32.855	0.042			-0.900107	0.054278	-177.552	TCONS_00025465	XLOC_019873
AK016760	ncRNA								M64837			1903	0	0	1904	0	1	0	0			1		1						515.654	0.271			-1.23109	0.046776		TCONS_00025657	XLOC_020029
AK016764	ncRNA		AK169704	-593							AF119955,AJ005073,AJ005074,AK029827,AK031256,AK033943,AK129340,AK145893,AK147736,AK167574,AK169704,BC026823,BC051123,NM_001164677,NM_001164678,NM_011052	1440	0	0	1440	0	1	0	0	1		5		1	1					107.241	0.074			-0.939607	0.0822341		TCONS_00027927	XLOC_021791
AK016766	ncRNA						AK150237,BC010211,AK168215,AK144802,AK170722,NM_146207	NM_146207			AK166251,AK189560,BC024113	977	0	0	977	0	1	0	0	2										31.99	0.033				0.064029	-17.0433	TCONS_00025770	XLOC_020116
AK016767	ncRNA	TRUE										1030	0	70497	71527	1	0.014	0	0.971			1		1	1					87.556	0.085			-1.06314	0.0358718	-71.0308	TCONS_00028699	XLOC_022430
AK016768	ncRNA	TRUE										1489	0	0	1489	0	1	0	0			6												2.02798	0.0391935		TCONS_00000166	XLOC_000143
AK016774	ncRNA						BC028526,NM_181394	NM_181394			AK007332	1216	0	0	1216	0	1	0	0			1								65.501	0.054			-1.00884	0.0141798		TCONS_00027845	XLOC_021722
AK016780	ncRNA								NM_001145977			1464	0	0	1464	0	1	0	0			9		2	4					266.138	0.182			2.7313	0.00947665		TCONS_00011080	XLOC_008562
AK016790	ncRNA	TRUE										1600	0	9033	10633	5	0.15	0	3.125			2		1	1	uc009vgj.1		AK016790	Mus musculus adult male testis cDNA, RIKEN full-length enriched library, clone:4933412F11 product:inferred: RIKEN cDNA 4933412F11 gene, full insert sequence.	0	0			0.40614	0.00432966		TCONS_00030094	XLOC_023303
AK016793	ncRNA								AK139667.2	AK159507		1044	0	0	1044	0	1	0	0			2		1						165.449	0.158			-0.950764	0.030253	-48.0288	TCONS_00023730	XLOC_018507
AK016799	ncRNA						BC167165,NM_175459,DQ871027,BC066143,AK054020	BC066143				2217	0	545	2762	1	0.803	0	0.451			5								78.255	0.035			-1.15423	0.0219418		TCONS_00014589	XLOC_011261
AK016801	ncRNA	TRUE										1058	0	12970	14029	3	0.075	0	2.836					1	1					10.983	0.01			1.28704	0.107439		TCONS_00009741	XLOC_007490
AK016802	ncRNA						BC014726,AB041541,NM_021372,AK147674	AK147674				1114	0	0	1114	0	1	0	0	1		2			1					158.123	0.142			-1.17471	0.0289546	-32.4345	TCONS_00003508	XLOC_002834
AK016806	ncRNA		NM_001113517	-729							AK129064,AK139156,NM_001113517	1311	0	0	1311	0	1	0	0			1								59.782	0.046				0.0107983		TCONS_00026587	XLOC_020662
AK016812	ncRNA	TRUE										845	0	0	845	0	1	0	0			1		1										0.295556	0.0530694		TCONS_00009653	XLOC_007421
AK016815	ncRNA						AK081489,AK171871,NM_138646,AY043415,BC063055,AK129418,AK147954	AK081489			BC004668	1261	0	0	1261	0	1	0	0					1	1					164.911	0.131			-1.15462	0.0403956		TCONS_00021117	XLOC_016433
AK016816	ncRNA								AK029047			1584	0	286	1871	1	0.847	0	0.631	1		2								135.667	0.086				0.0239162		TCONS_00023245	XLOC_018116
AK016822	ncRNA	TRUE										1301	0	0	1301	0	1	0	0					1	1					121.224	0.093			-1.08561	0.0843968	23.6194	TCONS_00021118	XLOC_016434
AK016823	ncRNA		AK077011	-75							AB046593,AK046978,AK053820,AK077011,AK137024,AK148269,AK220258,BC168400,NM_001024856,NM_001024857,NM_080788	1973	0	0	1973	0	1	0	0			1		1	1					264.709	0.134			0.15002	0.0397389		TCONS_00015643	XLOC_012084
AK016828	ncRNA	TRUE										1917	0	0	1918	0	1	0	0			1		1	1					222.588	0.116			-1.13782	0.0561561		TCONS_00010519	XLOC_008107
AK016831	ncRNA	TRUE										1928	0	0	1928	0	1	0	0			2		1	1					182.325	0.095			0.705728	0.00922503	-172.698	TCONS_00029346	XLOC_022934
AK016835	ncRNA								BC091001	AF378759		1521	0	5277	6798	3	0.224	0	1.972			2		1						331.882	0.218			-0.885635	0.0158642		TCONS_00025832	XLOC_020168
AK016836	ncRNA	TRUE										2122	0	1483	3605	1	0.589	0	0.471			5			1	uc007rcr.1		AK016836	Mus musculus adult male testis cDNA, RIKEN full-length enriched library, clone:1700061B19 product:unclassifiable, full insert sequence.	24.18	0.011				0.0666102	7.531	TCONS_00007167	XLOC_005500
AK016837	ncRNA		BC048819	395							AK014128,AK032582,AK036203,AK044740,AK129254,AK146209,BC048819,NM_001039389,NM_172445	1765	0	0	1765	0	1	0	0			3		1	1	uc007pkm.1		AK016837	Mus musculus adult male testis cDNA, RIKEN full-length enriched library, clone:4933417A01 product:unclassifiable, full insert sequence.	283.287	0.161			-1.33912	0.12255	65.0734	TCONS_00006701	XLOC_005210
AK016840	ncRNA		AK145013	-833						AK007673	AK013924,AK089043,AK145013,BC025948,NM_009786,U97327	1123	0	0	1123	0	1	0	0			4								126.316	0.112			-1.25409	0.00411037		TCONS_00000766	XLOC_000557
AK016844	ncRNA								NM_030595			1137	0	0	1137	0	1	0	0			1		1	1					358.123	0.315			3.40282	0.106938		TCONS_00017478	XLOC_013518
AK016846	ncRNA								NM_027711	AK135212		1570	0	0	1570	0	1	0	0			2								82.43	0.053				0.116472	-358.321	TCONS_00007310	XLOC_005615
AK016855	ncRNA		NM_029662	-120								1638	0	529	2167	1	0.756	0	0.611			1								349.986	0.214			-0.589948	0.0402065		TCONS_00019475	XLOC_015058
AK016858	ncRNA								AY179966			1286	0	6481	7767	1	0.166	0	0.778			2		1	1					27.267	0.021			-1.17592	0.0277054		TCONS_00026066	XLOC_020358
AK016862	ncRNA		NR_040383	-93						AK017797		1733	0	0	1733	0	1	0	0			6												-1.20658	0.02718		TCONS_00028709	XLOC_022440
AK016863	ncRNA									NM_008245		1696	0	0	1696	0	1	0	0			4								291.282	0.172			-1.25048	0.0341079		TCONS_00014177	XLOC_010960
AK016871	ncRNA				BC100598	758			NM_001033436			876	0	0	876	0	1	0	0											20.989	0.024			-1.06648	0.0413924	-66.8656	TCONS_00006099	XLOC_004816
AK016874	ncRNA						NM_011247	NM_011247			U83913	1957	0	0	1959	0	1	0	0	1		3		2	2					1129.78	0.577			-1.05004	0.00550898		TCONS_00024766	XLOC_019362
AK016875	ncRNA						BC160212	BC160212		BC160212		1705	0	0	1706	0	1	0	0											115.387	0.068			-1.14337	0.0199867		TCONS_00022946	XLOC_017877
AK016876	ncRNA	TRUE										1463	0	0	1464	0	1	0	0			6								483.671	0.331				0.0235042		TCONS_00024428	XLOC_019091
AK016877	ncRNA		NM_030104	-87						AB074757	AK018916,AK076910,BC100486,NM_030104	1640	0	0	1640	0	1	0	0			1								40.535	0.025			-0.776497	0.0955877		TCONS_00012846	XLOC_009961
AK016878	ncRNA	TRUE										917	0	0	917	0	1	0	0			1		1	1					162.366	0.177	TRUE		-1.28192	0.0105542		TCONS_00010542	XLOC_008129
AK016880	ncRNA		NM_001135657	-75					NM_008982			1005	0	8171	9176	1	0.11	0	0.995			1								39.699	0.04			-1.19052	0.136419		TCONS_00015402	XLOC_011908
AK016885	ncRNA	TRUE										1548	0	0	1550	0	1	0	0			3		1	1					182.372	0.118			-1.20461	0.0551133	-45.0324	TCONS_00021767	XLOC_016977
AK016887	ncRNA		BC052531	457								1242	0	18845	20087	2	0.062	0	1.61			1		1	1	uc007lxt.1		AK016887	Mus musculus adult male testis cDNA, RIKEN full-length enriched library, clone:4933424D04 product:angiotensin converting enzyme, full insert sequence.	210.576	0.17			-1.18408	0.036706	-25.4793	TCONS_00005018	XLOC_004043
AK016894	ncRNA	TRUE							AK039527			2017	0	0	2017	0	1	0	0			8		1	1					193.669	0.096			-1.18608	0.0141951	-79.0657	TCONS_00018753	XLOC_014465
AK016895	ncRNA						BC156654	BC156654		BC156654		1352	0	0	1352	0	1	0	0			1								190.345	0.141				0.134593		TCONS_00005743	XLOC_004639
AK016898	ncRNA											986	0	24378	25364	2	0.039	0	2.028					1		uc007izz.1		AK016898	Mus musculus adult male testis cDNA, RIKEN full-length enriched library, clone:4933424L21 product:unclassifiable, full insert sequence.	45.049	0.046			-1.08775	0.00702286		TCONS_00004607	XLOC_003709
AK016899	ncRNA	TRUE										1944	0	129	2073	1	0.938	0	0.514			2		1	1					295.695	0.152			-1.22611	0.0542855	-11.0953	TCONS_00019385	XLOC_014981
AK016903	ncRNA									BC011219		1420	0	0	1420	0	1	0	0			2								54.097	0.038			-1.1106	0.0707111		TCONS_00022050	XLOC_017191
AK016904	ncRNA	TRUE										975	0	756	1731	1	0.563	0	1.026						2					58.626	0.06			-1.27785	0.0507578	-33.5954	TCONS_00012328	XLOC_009587
AK016911	ncRNA		DQ703761	-393							AK079739,AK158939,BC012707,NM_010361	1449	0	0	1449	0	1	0	0			2								201.742	0.139			-1.18178	0.0405435	-28.0482	TCONS_00003099	XLOC_002499
AK016913	ncRNA								DQ017389	BC113126		1030	0	5692	6722	1	0.153	0	0.971			2		1						141.992	0.138			-1.0962	0.0197428	-22.8914	TCONS_00009864	XLOC_007571
AK016922	ncRNA	TRUE	NM_177130	-172							AK029059,AK030588,AK147159,BC119772,BC121823,NM_177130	1544	0	0	1544	0	1	0	0					1	3					134.348	0.087			-1.16759	0.0419604		TCONS_00017589	XLOC_013614
AK016924	ncRNA	TRUE							AK037830			1299	0	8722	10021	1	0.13	0	0.77			5								82.665	0.064			-0.993612	0.0521519		TCONS_00011831	XLOC_009179
AK016925	ncRNA		AK018917	-109					BC052416			1594	0	7404	8998	1	0.177	0	0.627					1						112.992	0.071				0.0647988	-83.1194	TCONS_00000578	XLOC_000488
AK016932	ncRNA	TRUE										1185	0	0	1185	0	1	0	0			2								60.559	0.051			-0.664023	0.157183		TCONS_00003129	XLOC_002525
AK016933	ncRNA								NM_001077514			1404	0	1692	3096	1	0.453	0	0.712			1		1	1					128.876	0.092			-0.979094	0.135622	-194.108	TCONS_00016678	XLOC_012910
AK016935	ncRNA								AK162424			1548	0	864	2412	1	0.642	0	0.646			1			2					54.682	0.035				0.107308		TCONS_00004608	XLOC_003710
AK016944	ncRNA										AK020003,AK083605,AK122228,AK147365,BC051177,BC117878,BC117879,NM_030235	1233	0	0	1233	0	1	0	0			1								149.765	0.121			-0.994456	0.0440519	19.827	TCONS_00023570	XLOC_018378
AK016950	ncRNA	TRUE										1064	0	19545	20609	5	0.052	0	4.699							uc011yro.1		4933406K04Rik	Mus musculus adult male testis cDNA, RIKEN full-length enriched library, clone:4930426M03 product:unclassifiable, full insert sequence.	195.718	0.184			-1.14585	0.127106	-46.2441	TCONS_00006478	XLOC_005124
AK016956	ncRNA									AK012372		1532	0	658	2191	1	0.7	0	0.653						1									1.33311	0.0309051		TCONS_00016868	XLOC_013055
AK016962	ncRNA		AK147559	-358					NM_001170912		AK147559,NM_001170913	1017	0	0	1017	0	1	0	0					1						125.987	0.124			-0.910823	0.0983422		TCONS_00024697	XLOC_019303
AK016970	ncRNA	TRUE										1496	0	0	1496	0	1	0	0					1						127.734	0.085			-1.17352	0.0198419		TCONS_00010258	XLOC_007895
AK016971	ncRNA				AK143315	594						1374	0	0	1374	0	1	0	0	1				2	1									-0.776044	0.0309663		TCONS_00008406	XLOC_006397
AK016983	ncRNA									AK044963		1015	0	2989	4006	2	0.254	0	1.97					1	1					158.581	0.156			-0.586774	0.097676	-51.6586	TCONS_00014734	XLOC_011380
AK016987	ncRNA		AK076961	-93						NM_172911		1558	0	725	2283	1	0.682	0	0.642			2		1	1					130.263	0.084			-1.37436	0.0158249	-62.7224	TCONS_00025876	XLOC_020206
AK016992	ncRNA						AK053836,JN860221,BC056392,NM_026886,AK165719,AK005085	NM_026886				1343	0	0	1343	0	1	0	0						1					196.281	0.146			-0.895001	0.0247002	-247.617	TCONS_00022057	XLOC_017196
AK016998	ncRNA		AF543541	-239					X53654			1193	0	369	1563	1	0.764	0	0.838			2								195.319	0.164			-0.263855	0.121029	35.6412	TCONS_00024228	XLOC_018924
AK016999	ncRNA	TRUE										744	0	87300	88044	3	0.008	0	4.032					1						134.859	0.181			-0.977804	0.0694861		TCONS_00003553	XLOC_002868
AK017001	ncRNA								NM_001013012			1266	0	0	1266	0	1	0	0	1		1		1	2					147.494	0.117			-1.19436	0.0249648	-34.5371	TCONS_00024155	XLOC_018863
AK017006	ncRNA	TRUE	AK030191	-13								1002	0	453	1455	1	0.689	0	0.998			2				uc007uys.1		AK017006	Mus musculus adult male testis cDNA, RIKEN full-length enriched library, clone:4933431J24 product:unclassifiable, full insert sequence.	182.451	0.182			0.382335	0.0793151		TCONS_00008806	XLOC_006724
AK017009	ncRNA		BC137798	144							AK030895,AK037129,AK050176,AK136872,BC060722,BC137798,NM_001081282	1350	0	0	1350	0	1	0	0	1				1	1					189.023	0.14			-1.31348	0.109894	-39.5498	TCONS_00027751	XLOC_021644
AK017010	ncRNA		NM_145599	-206						AK161023		2072	0	73639	75711	13	0.027	0	6.274			4		1	3	uc009mhs.1		AK017010	Mus musculus adult male testis cDNA, RIKEN full-length enriched library, clone:4933431K23 product:unclassifiable, full insert sequence.	213.735	0.103			-0.988604	0.0512344		TCONS_00026069	XLOC_020361
AK017011	ncRNA	TRUE										934	0	14630	15564	3	0.06	0	3.212			2								327.217	0.35			-0.905007	0.0315777		TCONS_00007270	XLOC_005581
AK017013	ncRNA	TRUE										1190	0	3344	4534	1	0.262	0	0.84			3		1						326.636	0.274			-1.08773	0.0182147		TCONS_00023048	XLOC_017960
AK017025	ncRNA		AK006348	-66								1249	0	119744	120993	5	0.01	0	4.003			1		1	1	uc009jns.1		AK017025	Mus musculus adult male testis cDNA, RIKEN full-length enriched library, clone:1700001C18 product:unclassifiable, full insert sequence.	224.399	0.18				0.00891606		TCONS_00025536	XLOC_019930
AK017040	ncRNA	TRUE	AK044752	-169								1481	0	6045	7526	3	0.197	0	2.026			2				uc009qsg.1		AK017040	Mus musculus adult male testis cDNA, RIKEN full-length enriched library, clone:4921522K19 product:unclassifiable, full insert sequence.	180.666	0.122			-1.08406	0.0125949		TCONS_00027709	XLOC_021609
AK017042	ncRNA	TRUE										1307	0	781	2088	1	0.626	0	0.765			1		2	2					95.665	0.073			-1.18777	0.0322704	-115.199	TCONS_00002321	XLOC_001853
AK017046	ncRNA								BC065111			1384	0	0	1384	0	1	0	0					1	1					8.591	0.006			-1.10853	0.0439092		TCONS_00009929	XLOC_007627
AK017047	ncRNA	TRUE										1220	0	8382	9602	1	0.127	0	0.82						1					8.42	0.007			-1.23378	0.0501133		TCONS_00006922	XLOC_005398
AK017048	ncRNA								BC150740			1084	0	2029	3113	1	0.348	0	0.923					1		uc008vyo.1		AK017048	Mus musculus adult male testis cDNA, RIKEN full-length enriched library, clone:4930589P08 product:unclassifiable, full insert sequence.	59.839	0.055			-1.32359	0.013694		TCONS_00019692	XLOC_015238
AK017050	ncRNA		AB000490	-441								926	0	7037	7963	1	0.116	0	1.08			1			1					189.411	0.205			-1.07508	0.0501864	-98.7382	TCONS_00015115	XLOC_011674
AK017052	ncRNA	TRUE										1085	0	0	1085	0	1	0	0			1		1						45.799	0.042			-0.747351	0.12426	37.9236	TCONS_00029155	XLOC_022774
AK017061	ncRNA								BC063058			884	0	937	1821	1	0.485	0	1.131					1	1					55.396	0.063			-1.00949	0.0555041		TCONS_00027812	XLOC_021692
AK017062	ncRNA	TRUE										1316	0	575	1892	1	0.696	0	0.76			2								25.734	0.02			-1.09911	0.0183358		TCONS_00013674	XLOC_010616
AK017064	ncRNA	TRUE							BC027227			1114	0	0	1114	0	1	0	0											48.453	0.043			-1.1541	0.121834		TCONS_00005567	XLOC_004487
AK017066	ncRNA				AK029588	-46				AF318182		1364	0	6589	7954	1	0.172	0	0.733			1		1						65.354	0.048			-0.564421	0.203253		TCONS_00013550	XLOC_010526
AK017068	ncRNA	TRUE										735	0	368	1103	1	0.666	0	1.361			1		1		uc008uqp.1		AK017068	Mus musculus adult male testis cDNA, RIKEN full-length enriched library, clone:4933435F18 product:RIKEN cDNA 4933435F18 gene, full insert sequence.	54.521	0.074			-1.26475	0.0265282	-53.3848	TCONS_00020263	XLOC_015743
AK017069	ncRNA	TRUE										1793	0	0	1794	0	1	0	0					1	1					432.622	0.241			-0.750132	0.0830109	-14.0987	TCONS_00024440	XLOC_019101
AK017073	ncRNA	TRUE										809	0	0	809	0	1	0	0			2								46.445	0.057			-1.27901	0.0550025	-346.974	TCONS_00016679	XLOC_012911
AK017077	ncRNA		AB201456	-94					NM_011103			1300	0	2547	3848	2	0.338	0	1.538											216.478	0.167			-1.05743	0.0616993		TCONS_00008441	XLOC_006428
AK017078	ncRNA						AK030440,NM_001252501,AF195056,NM_021377,AF284755,AF137367	NM_001252501				1077	0	0	1077	0	1	0	0			1		1						6.479	0.006			0.652765	0.187479		TCONS_00014774	XLOC_011415
AK017080	ncRNA		AK006550	-97					AK052527			1057	0	1568	2625	1	0.403	0	0.946			2		1	2					38.317	0.036			-1.17074	0.101301	-47.1195	TCONS_00006341	XLOC_005007
AK017086	ncRNA	TRUE										1634	0	66336	67970	6	0.024	0	3.672			3		2	2	uc007bss.1		AK017086	Mus musculus adult male testis cDNA, RIKEN full-length enriched library, clone:4930545H10 product:unclassifiable, full insert sequence.	12.589	0.008			0.745877	0.135992		TCONS_00001412	XLOC_001084
AK017089	ncRNA								AK054370			1436	0	0	1436	0	1	0	0			2		1	3					49.644	0.035			-0.667636	0.529415	-9.254	TCONS_00007678	XLOC_005902
AK017091	ncRNA											1442	0	0	1442	0	1	0	0											322.6	0.224			-0.982065	0.0543661		TCONS_00003111	XLOC_002511
AK017092	ncRNA		BC094407	465								764	0	476	1240	1	0.616	0	1.309							uc009pet.1		AK017092	Mus musculus adult male testis cDNA, RIKEN full-length enriched library, clone:4933437C06 product:unclassifiable, full insert sequence.	101.166	0.132			-1.36133	0.0389817	-284.528	TCONS_00027466	XLOC_021396
AK017098	ncRNA	TRUE										1470	0	0	1470	0	1	0	0					1	1					92.9	0.063			0.0567951	0.0354832		TCONS_00019922	XLOC_015440
AK017099	ncRNA		NM_175474	-183						AK140849	AK033618,AK039192,BC120681,BC120683,NM_175474	1178	0	0	1178	0	1	0	0			1		1	2					43.063	0.037			-1.14556	0.0855592		TCONS_00022087	XLOC_017219
AK017101	ncRNA								BC018278	BC158030		1471	0	0	1471	0	1	0	0			3		1						120.629	0.082			0.838054	0.235346		TCONS_00015928	XLOC_012312
AK017105	ncRNA	TRUE	AK138862	-776								1011	0	6081	7092	2	0.143	0	1.978			1		1	1					84.71	0.084				0.0232703		TCONS_00009978	XLOC_007659
AK017121	ncRNA	TRUE										2038	0	0	2038	0	1	0	0			5		1	1					198.449	0.097			-1.15083	0.341447	-29.9773	TCONS_00016193	XLOC_012517
AK017123	ncRNA	TRUE										848	0	0	849	0	1	0	0					1	1					67.556	0.08			-1.03606	0.0831345		TCONS_00021284	XLOC_016570
AK017126	ncRNA		AK006366	-91							AK006366,AK156960,BC003478,BC083112,D87903,NM_007481	1964	0	0	1965	0	1	0	0	1		3								433.057	0.22			2.30882	0.0461341		TCONS_00006234	XLOC_004924
AK017129	ncRNA	TRUE										1364	0	0	1365	0	1	0	0			1								6.539	0.005			-1.20047	0.0400993		TCONS_00023634	XLOC_018429
AK017132	ncRNA		AK149316	-170								1495	0	103264	104760	7	0.014	0	4.682			2		1						142.998	0.096			-0.864302	0.0931333		TCONS_00017491	XLOC_013528
AK017135	ncRNA								BC132050	AK007541		1455	0	0	1457	0	1	0	0			5		1	1					126.514	0.087				0.146917	-0.2118	TCONS_00008086	XLOC_006141
AK017144	ncRNA											1694	0	2941	4635	3	0.365	0	1.771			5		1	1					215.326	0.127			-1.1787	0.0687991	-5.8489	TCONS_00017447	XLOC_013490
AK017147	ncRNA		AK167051	-81								1370	0	4309	5679	2	0.241	0	1.46			3								32.229	0.024			-1.20416	0.0418897	-49.3925	TCONS_00006866	XLOC_005348
AK017148	ncRNA	TRUE										755	0	20669	21424	2	0.035	0	2.649			1		1	2	uc008xky.1		AK017148	Mus musculus 11 days pregnant adult female ovary and uterus cDNA, RIKEN full-length enriched library, clone:5033403H07 product:hypothetical protein, full insert sequence.	51.237	0.068			-1.03877	0.108719	-116.344	TCONS_00021711	XLOC_016931
AK017151	ncRNA									AK053537		1065	0	9801	10866	1	0.098	0	0.939			1		1						394.65	0.371			2.99759	0.236158		TCONS_00000922	XLOC_000674
AK017157	ncRNA						AK164699	AK164699	AF051367			1484	0	0	1484	0	1	0	0											168.927	0.114			-1.0609	0.0827634	-33.5795	TCONS_00011270	XLOC_008696
AK017175	ncRNA						BC166020,D50411,NM_007400	NM_007400				1250	0	18	1269	1	0.986	0	0.8			1								239.598	0.192				0.0323658		TCONS_00025637	XLOC_020012
AK017177	ncRNA		NM_181405	-135	AK088940	-49				AK170241		1867	0	443	2310	1	0.808	0	0.536			1		1		uc007cbv.1		AK017177	Mus musculus 11 days pregnant adult female ovary and uterus cDNA, RIKEN full-length enriched library, clone:5033417F24 product:hypothetical protein, full insert sequence.	84.365	0.045			0.049875	0.0698628		TCONS_00001455	XLOC_001122
AK017178	ncRNA						AK155203,NM_019680,AK155709	AK155203				1505	0	0	1507	0	1	0	0			1								340.923	0.227			-1.14854	0.0373184	-45.5608	TCONS_00029414	XLOC_022996
AK017181	ncRNA								AK033481			886	0	12155	13042	1	0.068	0	1.129			3		1	1					103.39	0.117			-1.21048	0.0444667		TCONS_00005226	XLOC_004203
AK017188	ncRNA								AF208031			1162	0	0	1162	0	1	0	0			3		2	2					222.537	0.192			-0.055824	0.0734633	-103.16	TCONS_00021584	XLOC_016826
AK017189	ncRNA						BC068285,NM_146096,AK050879	AK050879				1062	0	0	1062	0	1	0	0			3								57.341	0.054			-1.38311	0.0135093		TCONS_00014087	XLOC_010888
AK017190	ncRNA								NM_001164488	NM_001012310		648	0	0	648	0	1	0	0					1						71.645	0.111			-1.13671	0.048919		TCONS_00005760	XLOC_004653
AK017191	ncRNA						AK079262,BC018222,AK144325,NM_144936,BC026654	BC026654				1303	0	0	1303	0	1	0	0			7								104.062	0.08			-1.04347	0.00313654		TCONS_00028161	XLOC_021989
AK017193	ncRNA	TRUE	NM_008910	-163							AK076054,BC008595,D28117,NM_008910	1264	0	0	1264	0	1	0	0			1		1	1					304	0.241	TRUE		0.520451	0.0857722		TCONS_00006258	XLOC_004940
AK017194	ncRNA	TRUE										781	0	14544	15325	2	0.051	0	2.561					1	1					25.012	0.032			-1.07631	0.108868		TCONS_00026241	XLOC_020495
AK017196	ncRNA	TRUE										700	0	1056	1757	1	0.399	0	1.429			2								74.754	0.107			-0.438636	0.0908775		TCONS_00027208	XLOC_021185
AK017200	ncRNA	TRUE										1460	0	0	1460	0	1	0	0			2			1					240.584	0.165			-1.13224	0.0295436		TCONS_00020967	XLOC_016312
AK017203	ncRNA									NM_010402		952	0	21194	22146	2	0.043	0	2.101			4		1	1					175.018	0.184			-0.922624	0.0491523	-151.373	TCONS_00025956	XLOC_020270
AK017208	ncRNA						NM_001081064,AK020883,BC115886,AK159017.1	AK159017.1				1206	0	0	1207	0	1	0	0			6								146.797	0.122			-1.0763	0.0824077	-187.428	TCONS_00010139	XLOC_007791
AK017219	ncRNA						AK137292,AK164914,AK159996,NM_001160292,NM_001110230,NM_001110229,AF090696,NM_001110232,AK160861,NM_001110231	NM_001110229				1022	0	0	1023	0	1	0	0			1								169.809	0.166			-0.938758	0.0560444	-248.863	TCONS_00016112	XLOC_012450
AK017220	ncRNA						Y00850	Y00850				932	0	29649	30581	4	0.03	0	4.292			3				uc007itn.1		AK017220	Mus musculus 10 days neonate intestine cDNA, RIKEN full-length enriched library, clone:5133400J02 product:hypothetical protein, full insert sequence.	240.862	0.258			1.37874	0.233646		TCONS_00004566	XLOC_003677
AK017228	ncRNA						NM_028275,AK007175	AK007175				1800	0	0	1801	0	1	0	0			3								387.543	0.215			-1.19856	0.0375056		TCONS_00008396	XLOC_006387
AK017231	ncRNA						AK018338,NM_001253716,AK009822,AK002356,AK049714,BC014738,NM_001253712,NM_001253715,NM_001253714,NM_026322,BC089311	NM_001253716				1280	0	0	1280	0	1	0	0						1					140.388	0.11			-1.03739	0.156523	-93.9157	TCONS_00009184	XLOC_007029
AK017233	ncRNA						NM_010678,AK014322,BC052061	NM_010678				1336	0	0	1336	0	1	0	0											330.705	0.248			-1.09032	0.0989759		TCONS_00001178	XLOC_000875
AK017236	ncRNA	TRUE										1534	0	0	1536	0	1	0	0			1		3	2					67.995	0.044			-1.34685	0.0385811		TCONS_00023385	XLOC_018227
AK017240	ncRNA									AK160207		1540	0	835	2379	1	0.649	0	0.649			4			1					124.05	0.081			-1.00559	0.0159683		TCONS_00024473	XLOC_019128
AK017243	ncRNA		NM_009682	-114	AK035146	50						1658	0	109	1767	1	0.938	0	0.603			5		1	1	uc009hzg.1		AK017243	Mus musculus 6 days neonate head cDNA, RIKEN full-length enriched library, clone:5430400D12 product:unclassifiable, full insert sequence.	165.572	0.1			-1.01189	0.0517751		TCONS_00024495	XLOC_019138
AK017255	ncRNA	TRUE										1067	0	26014	27082	1	0.039	0	0.937			1		2	3					80.889	0.076				0.0548172	-103.264	TCONS_00006093	XLOC_004812
AK017261	ncRNA											1674	0	67308	68982	1	0.024	0	0.597			1								156.432	0.093			-0.721074	0.181107	16.6076	TCONS_00024193	XLOC_018897
AK017263	ncRNA	TRUE										1143	0	28168	29311	1	0.039	0	0.875			1								278.42	0.244			-0.954437	0.0558093	-30.599	TCONS_00024704	XLOC_019310
AK017264	ncRNA						AK035655,BC050915,AF506821,NM_153412,BC060683,NM_001252442,AK050493	AK050493				2151	0	0	2151	0	1	0	0			5								133.682	0.062			-1.13504	0.0195323	-52.0357	TCONS_00011515	XLOC_008912
AK017284	ncRNA						NM_029734,BC051524,AK167510,AK150578	AK150578				740	0	0	740	0	1	0	0			3		1						50.403	0.068			-0.214108	0.055328		TCONS_00009754	XLOC_007501
AK017285	ncRNA									AK052990		1330	0	0	1331	0	1	0	0			1		1	1					794.124	0.597				0.0688573	-536.587	TCONS_00029332	XLOC_022920
AK017296	ncRNA		AF149094	149	AK030298	818			BC106188			1011	0	11859	12870	2	0.079	0	1.978					1		uc008auz.1		AK017296	Mus musculus 6 days neonate head cDNA, RIKEN full-length enriched library, clone:5430411J08 product:hypothetical protein, full insert sequence.	151.815	0.15			0.262431	0.0246256		TCONS_00011952	XLOC_009267
AK017298	ncRNA											2071	0	0	2074	0	1	0	0			3		1	1					363.121	0.175			-1.1593	0.0204523		TCONS_00024175	XLOC_018879
AK017306	ncRNA	TRUE										1190	0	957	2147	1	0.554	0	0.84			1		1	1	uc007ecv.1		AK017306	Mus musculus adult male hippocampus cDNA, RIKEN full-length enriched library, clone:2900001L02 product:unclassifiable, full insert sequence.	141.174	0.119			2.14524	0.129764	-43.5258	TCONS_00000958	XLOC_000704
AK017313	ncRNA						X53599,NM_010230,NM_001043322,BC138036,BC171945	NM_001043322				1089	0	0	1089	0	1	0	0			7								242.541	0.223			-1.00255	0.0653634	-141.667	TCONS_00015576	XLOC_012041
AK017315	ncRNA	TRUE										1593	0	0	1594	0	1	0	0			9		1	1					165.004	0.104			-1.28078	0.0529937	-316.966	TCONS_00013231	XLOC_010272
AK017326	ncRNA						NM_001004176,AB553633	AB553633				1790	0	0	1799	0	1	0	0			2								277.435	0.155				0.0350579		TCONS_00018335	XLOC_014131
AK017335	ncRNA								NM_001253358			1183	0	0	1183	0	1	0	0											407.295	0.344			-1.07927	0.0657472	-266.349	TCONS_00008401	XLOC_006392
AK017339	ncRNA	TRUE										973	0	6566	7539	1	0.129	0	1.028					1	1	uc007rhk.1		AK017339	Mus musculus 6 days neonate head cDNA, RIKEN full-length enriched library, clone:5430425K12 product:unclassifiable, full insert sequence.	310.888	0.32			-1.096	0.042711		TCONS_00007222	XLOC_005544
AK017348	ncRNA		NM_001168289	-103							AB210840,AK017329,AK140091,AK165732,BC147693,BC147694,BC147752,BC147753,BC172142,NM_001168289,NM_027772	1162	0	0	1162	0	1	0	0	1				1	4					20.504	0.018			2.25107	0.0651054		TCONS_00002932	XLOC_002360
AK017349	ncRNA								AK029581			1023	0	9766	10789	3	0.095	0	2.933			1		1	1	uc007okm.1		AK017349	Mus musculus 6 days neonate head cDNA, RIKEN full-length enriched library, clone:5430427M07 product:unclassifiable, full insert sequence.	93.37	0.091			-1.03792	0.0682237		TCONS_00005681	XLOC_004588
AK017364	ncRNA									NM_007918		1630	0	0	1630	0	1	0	0			4								123.986	0.076			-1.05232	0.00777502		TCONS_00025836	XLOC_020172
AK017366	ncRNA									AK040968		1544	0	0	1544	0	1	0	0					1	1					123.754	0.08				0.0152889		TCONS_00008542	XLOC_006513
AK017377	ncRNA							NM_009056				673	0	579	1252	1	0.538	0	1.486					1	1					79.258	0.118			2.96719	0.0246518		TCONS_00012602	XLOC_009801
AK017386	ncRNA	TRUE										542	0	0	542	0	1	0	0			2		2						36.531	0.067				0.00576219		TCONS_00017449	XLOC_013492
AK017393	ncRNA	TRUE										1418	0	0	1418	0	1	0	0			5								138.521	0.098			-1.18955	0.00906802		TCONS_00011498	XLOC_008898
AK017398	ncRNA	TRUE										1189	0	6299	7488	1	0.159	0	0.841					1	1					88.639	0.075			-1.05786	0.088268		TCONS_00021418	XLOC_016682
AK017399	ncRNA							NM_015825				1084	0	0	1084	0	1	0	0			2		1	1					133.091	0.123			-1.28043	0.0441038	-160.915	TCONS_00011269	XLOC_008695
AK017401	ncRNA						AK220470,AK159213,AK085709,AK028797,AK151957,AK151926,AK151913,NM_207515,NM_175341,BC079898,AK167479,AK153261,GQ906534,BC075665,AK167694	BC079898				1646	0	0	1647	0	1	0	0			3								126.138	0.077			-1.2419	0.033717		TCONS_00008828	XLOC_006742
AK017404	ncRNA	TRUE										1219	0	97500	98719	4	0.012	0	3.281	1		19		1		uc011zra.1		AK017404	Mus musculus 6 days neonate head cDNA, RIKEN full-length enriched library, clone:5430437J10 product:unclassifiable, full insert sequence.	50.548	0.041			-0.0855761	0.00219073		TCONS_00009525	XLOC_007309
AK017409	ncRNA								BC018226	AK044328		1568	0	5787	7355	2	0.213	0	1.276					1		uc007qek.1		AK017409	Mus musculus 6 days neonate head cDNA, RIKEN full-length enriched library, clone:5430439A09 product:transcription factor AP-2, alpha, full insert sequence.	660.701	0.421			0.492531	0.0559527	-6.8947	TCONS_00006871	XLOC_005353
AK017410	ncRNA						NM_009148,BC034644,AK173235,AF022962,AK028250	AF022962				1842	0	0	1842	0	1	0	0			3								89.092	0.048			-1.09721	0.0432042	-394.573	TCONS_00022601	XLOC_017611
AK017413	ncRNA											2112	0	0	2112	0	1	0	0			4		1	1					342.1	0.162			-1.33933	0.0198295	-64.9789	TCONS_00024506	XLOC_019148
AK017417	ncRNA						AK044883,EU287941,EU287940,AK087488	AK044883			AK032454,AK049659,AK158962,AK182159,BC090633,BC130256,BC144949,BC144950,NM_009032,U89506	1236	0	0	1237	0	1	0	0			3		1						136.64	0.111				0.0245192		TCONS_00014384	XLOC_011127
AK017418	ncRNA	TRUE										894	0	9264	10158	1	0.088	0	1.119			1			1					159.986	0.179			-0.896386	0.0651128		TCONS_00008754	XLOC_006687
AK017423	ncRNA						AF175305,NM_019690,AJ010163,AF107848,NM_022000,AF125259,AK132636,AF116268,NM_201618,NM_010309,NM_001077507,AY519504,AY519502,AY519501,NR_003258.1,AY682719,BC062654,BC038067,M13964,BC092055,BC106133,Y00703,BC013824,AK168996,BC061496,BC080816,AK147051,AK159563,AK078037,BC034446,NM_201616,NM_001077510	NM_019690	AF085738			1021	0	36	1069	1	0.966	0	0.979			3								206.868	0.203			-1.05755	0.0358143	-25.0222	TCONS_00016033	XLOC_012383
AK017425	ncRNA									AK018215		1915	0	0	1916	0	1	0	0			2		1						26.075	0.014			-1.04141	0.0130583		TCONS_00000736	XLOC_000534
AK017428	ncRNA						NM_016667,U89997	U89997				1615	0	0	1615	0	1	0	0			5								206.138	0.128			-0.926914	0.0885246	-21.8227	TCONS_00010307	XLOC_007940
AK017430	ncRNA								NM_001034013			1842	0	32068	33910	4	0.054	0	2.172			4		1		uc007kmo.1		AK017430	Mus musculus 10 days neonate head cDNA, RIKEN full-length enriched library, clone:5530401A14 product:hypothetical protein, full insert sequence.	186.289	0.101			3.02461	0.201265	-6.1866	TCONS_00003900	XLOC_003163
AK017432	ncRNA		BC024492	162					AK218134	NM_017374	AK011496,AK132565,AK161397,BC024492,D88447,NM_178648	1563	0	0	1564	0	1	0	0											86.493	0.055			-1.00331	0.121914		TCONS_00025856	XLOC_020188
AK017435	ncRNA								AK153575	NM_175256		955	0	0	955	0	1	0	0			1								41.549	0.044			-0.787487	0.0199977		TCONS_00010895	XLOC_008402
AK017440	ncRNA	TRUE										2298	0	13212	15519	10	0.149	0	4.352	2		5		1	1					109.662	0.048		Rian	-0.916019	0.100282		TCONS_00005904	XLOC_004663
AK017444	ncRNA								BC094572			742	0	0	743	0	1	0	0					1	1					129.603	0.175			-0.89316	0.0232178		TCONS_00007694	XLOC_005918
AK017446	ncRNA									AK015888		1608	0	0	1611	0	1	0	0	1		9								190.014	0.118			-1.06521	0.00570908		TCONS_00017752	XLOC_013739
AK017459	ncRNA	TRUE										3047	0	29728	32775	5	0.093	0	1.641	1		13		1	1	uc009uan.2		5530601H04Rik	Mus musculus 10 days neonate head cDNA, RIKEN full-length enriched library, clone:5530601H04 product:RIKEN cDNA 5530601H04 gene, full insert sequence.	87.219	0.029			-0.968164	0.081995		TCONS_00029804	XLOC_023160
AK017488	ncRNA									AK140756		979	0	0	980	0	1	0	0	1		2								18.04	0.018			-0.720132	0.0980239		TCONS_00014899	XLOC_011508
AK017489	ncRNA	TRUE										1592	0	0	1593	0	1	0	0			2								71.684	0.045			-1.09558	0.0223694	-50.5757	TCONS_00026883	XLOC_020922
AK017498	ncRNA						AF105268,BC023448,AK132531,AK149312,NM_011821,NM_001079844,AK164668	AK164668				1853	0	0	1853	0	1	0	0											190.07	0.103			-0.994662	0.0890966	-57.2913	TCONS_00008802	XLOC_006720
AK017499	ncRNA						BC066994,AK035580,NM_001077661,AK129378,AK041953	AK041953				1346	0	0	1348	0	1	0	0	1				1	1					112.885	0.084			-1.11579	0.0576205		TCONS_00004272	XLOC_003465
AK017501	ncRNA						AK081267,AK220255,BC133678,U57345,NM_011215,AK138655,U82439	AK138655				1554	0	0	1557	0	1	0	0			3								548.419	0.353			-1.3164	0.0133607		TCONS_00005980	XLOC_004710
AK017511	ncRNA		NM_026921	-175	AK162645	625						1182	0	793	1975	1	0.598	0	0.846					1	1					155.907	0.132			-1.03782	0.019028	-50.5221	TCONS_00006995	XLOC_005454
AK017515	ncRNA								AK016384	NM_018755		1993	0	0	1993	0	1	0	0			4								511.819	0.257			2.24042	0.0179312		TCONS_00009651	XLOC_007419
AK017517	ncRNA		NM_080554	-145							AK005335,AK011026,AK029067,AK032992,AK078419,AK139644,AK145587,AK148284,AK220321,BC019112,NM_080554	1102	0	0	1103	0	1	0	0			1								61.632	0.056				0.0569185	-30.3303	TCONS_00015095	XLOC_011654
AK017518	ncRNA						BC141385,BC067031,NM_001033329,AK139416,AK122280,AK163874,AK038840	BC067031				1761	0	0	1761	0	1	0	0			4		1	1					74.859	0.043			-1.17428	0.03253	-146.225	TCONS_00029733	XLOC_023118
AK017519	ncRNA						AF011360,BC051133,NM_011880,NM_001199003	NM_001199003				1822	0	0	1824	0	1	0	0			2								237.893	0.131			-1.07937	0.130219	-57.7696	TCONS_00001851	XLOC_001451
AK017527	ncRNA		AK012061	-123								3269	0	0	3269	0	1	0	0			5								418.568	0.128				0.0242656		TCONS_00014479	XLOC_011168
AK017534	ncRNA		AK187884	99							AK013288,AK084372,AK134241,AK161063,AK161974,AK163729,AK173272,BC043695,NM_001038696,NM_026043	1431	0	0	1431	0	1	0	0			1				uc008rbi.1		AK017534	Mus musculus adult male tongue cDNA, RIKEN full-length enriched library, clone:2310005E23 product:unclassifiable, full insert sequence.	180.886	0.126			-1.35335	0.0429424	-40.8584	TCONS_00017770	XLOC_013753
AK017535	ncRNA								NM_134147	NM_201411		957	0	0	957	0	1	0	0			1		1	1					236.591	0.247			-0.865303	0.0378177	-83.077	TCONS_00014453	XLOC_011150
AK017536	ncRNA						U34595,AB303567,U26461,NM_001252266,U26460,NM_010492,U26459,BC002030,AK016989	U34595				1278	0	0	1279	0	1	0	0			1								75.211	0.059			-1.11062	0.0153078		TCONS_00023321	XLOC_018170
AK017539	ncRNA						AK087553,NM_178362,U58883,NM_009166,BC012703,AK122487,AK035212	NM_178362				1670	0	0	1676	0	1	0	0			1								165.465	0.099			-0.86661	0.00836388		TCONS_00014683	XLOC_011338
AK017540	ncRNA						AK030595,AK019150,BC024952,BC060505,BC013845,NM_172436,AK083156,AK147948,AK144958,AK210791,AK181457,AK208043	AK144958				1343	0	0	1343	0	1	0	0	1		1								135.754	0.101			-1.12658	0.0210914		TCONS_00016533	XLOC_012787
AK017552	ncRNA				AK013896	112		AK030639				1371	0	0	1371	0	1	0	0			7								73.786	0.054			-1.31022	0.00606928	-100.223	TCONS_00027410	XLOC_021357
AK017561	ncRNA	TRUE	AK218580	-30							NM_001033276	1428	0	0	1438	0	1	0	0			2		1	1					86.255	0.06			-1.20359	0.0207295	-16.3657	TCONS_00010027	XLOC_007702
AK017563	ncRNA	TRUE										1181	0	648	1829	1	0.646	0	0.847			1								54.633	0.046			-1.39059	0.0408407	9.1649	TCONS_00017201	XLOC_013294
AK017567	ncRNA	TRUE										1037	0	0	1042	0	1	0	0			2		1	2					590.286	0.569				0.407873		TCONS_00029138	XLOC_022761
AK017574	ncRNA						AK040943,AK134137,AK147939,BC138899,AK036609,AK040969,NM_177201,NM_001113354,AK122447	AK040969				771	0	0	771	0	1	0	0	2										166.912	0.216			-1.15736	0.0490904		TCONS_00029239	XLOC_022850
AK017575	ncRNA											2091	0	12386	14478	1	0.144	0	0.478			1		1	1					170.839	0.082			-0.98981	0.0307619	-50.6384	TCONS_00001384	XLOC_001059
AK017589	ncRNA						AK030389,BC172663,BC156169,AK122353,NM_172803,BC141138	AK030389				1678	0	0	1687	0	1	0	0			3								250.509	0.149			4.04413	0.0419715		TCONS_00005380	XLOC_004332
AK017599	ncRNA	TRUE	NM_001115153	-333							AK050969,AK088787,AK145409,AK146820,AK161654,AK168702,AK168981,BC028849,BC086664,NM_001013378,NM_001115149,NM_001115150,NM_001115151,NM_001115153	1044	0	0	1044	0	1	0	0			2		2	1					196.046	0.188	TRUE		0.890221	0.129439	-234.363	TCONS_00022331	XLOC_017408
AK017611	ncRNA									BC052657		1472	0	0	1475	0	1	0	0			2		1						357.909	0.243	TRUE		-1.09478	0.0349117	-53.6902	TCONS_00023863	XLOC_018617
AK017612	ncRNA						AK051332,BC010675,AK045954,X70296,AK159687,NM_009255,AK047856,AK164270,AK160700	AK047856				1455	0	0	1455	0	1	0	0			2								40.125	0.028			-0.0194613	0.0964739		TCONS_00001388	XLOC_001063
AK017623	ncRNA	TRUE										452	0	5161	5613	2	0.081	0	4.425					1						323.671	0.716			-0.917969	0.0203676		TCONS_00018572	XLOC_014325
AK017624	ncRNA	TRUE										1428	0	0	1436	0	1	0	0	1		4		1	2					105.553	0.074			-1.12622	0.0193607		TCONS_00016437	XLOC_012704
AK017625	ncRNA		AK159044	-413					BC037527	NM_001114096		1243	0	0	1243	0	1	0	0											321.788	0.259			-1.12128	0.0141635		TCONS_00002651	XLOC_002135
AK017634	ncRNA				AK186954	917						1661	0	7545	9206	4	0.18	0	2.408			1			1	uc007gqg.1		1810014B01Rik	Mus musculus 10 day old male pancreas cDNA, RIKEN full-length enriched library, clone:1810014B01 product:unclassifiable, full insert sequence.	610.713	0.368			-1.32325	0.0231414	-66.3851	TCONS_00002410	XLOC_001928
AK017643	ncRNA						AK085898	AK085898		NM_001012396		419	0	0	419	0	1	0	0			1								119.113	0.284			-1.06169	0.00279751		TCONS_00016156	XLOC_012485
AK017657	ncRNA	TRUE										1317	0	0	1318	0	1	0	0			1		1						117.554	0.089			-1.16989	0.046		TCONS_00021315	XLOC_016595
AK017674	ncRNA								AK002812	AK143177		1741	0	0	1743	0	1	0	0			10		1	1					228.299	0.131			-0.0493035	0.0162121		TCONS_00015236	XLOC_011774
AK017704	ncRNA						X85788,BC172723,BC172616,NM_007831,AK157715,AK090377,AK049746	NM_007831				1491	0	0	1493	0	1	0	0			3								90.285	0.061			0.715645	0.0626055		TCONS_00013795	XLOC_010711
AK017720	ncRNA						AK028826,NM_133816,BC012284,AK032634,AK041504,BC034733	AK041504				1388	0	0	1390	0	1	0	0			3								42.618	0.031			-1.16624	0.0846199	-25.2535	TCONS_00000394	XLOC_000337
AK017723	ncRNA						AK143506,AK155151,BC133714,AJ132389,NM_030730,AK083903	NM_030730				1761	0	0	1770	0	1	0	0	1		6								165.975	0.094			-0.827033	0.112715		TCONS_00028653	XLOC_022389
AK017752	ncRNA						BC157064,BC156284,U09563,U14666,NM_010264,AF390896	AF390896				1303	0	0	1303	0	1	0	0			2			1					51.568	0.04			-1.14328	0.020676		TCONS_00016355	XLOC_012635
AK017757	ncRNA										AK141728,BC050860,NM_028317	470	0	0	470	0	1	0	0			2								470.021	1			-1.37863	0.0196348	-41.0219	TCONS_00016179	XLOC_012504
AK017761	ncRNA	TRUE										852	0	0	852	0	1	0	0	2				1	1					140.791	0.165			-1.09039	0.102479	-123.628	TCONS_00005242	XLOC_004215
AK017765	ncRNA								NM_001081125		X99104	742	0	0	742	0	1	0	0											170.756	0.23			-1.05466	0.0295006		TCONS_00000476	XLOC_000408
AK017782	ncRNA						AK191942,AK163557,BC030881,NM_172960,BC060528,AK039217	AK039217				1595	0	0	1608	0	1	0	0	1		1								181.935	0.114			-1.10609	0.0342122	-45.3253	TCONS_00009857	XLOC_007565
AK017785	ncRNA		AF035207	354							AF035207,AK014659,AK054288,AK159745,AK161116,AK169609,BC012670,NM_016787	1563	0	0	1569	0	1	0	0					3	2					283.599	0.181			-0.608219	0.0145435		TCONS_00028427	XLOC_022201
AK017791	ncRNA						AK140447,BC145127,BC138055,AK165908,EF685152,AF307777,NM_052973,NM_001172098,EF685153,EF685155,EF685154,AK139183	NM_001172098				847	0	0	847	0	1	0	0			6								81.374	0.096			-1.16096	0.0124448		TCONS_00006155	XLOC_004858
AK017792	ncRNA						AK156494,AK172687,BC099942,BC153825,AK037058,NM_177909	NM_177909				1828	0	1038	2866	2	0.638	0	1.094											167.515	0.092			-0.726922	0.141903	-149.389	TCONS_00027783	XLOC_021665
AK017831	ncRNA		AK144569	-127							AK082353,AK144569,BC127058,NM_145965,NM_172952	1405	0	0	1405	0	1	0	0			2		1	1					231.028	0.164			-1.21654	0.01865	-108.782	TCONS_00006295	XLOC_004969
AK017837	ncRNA									AK015507		1352	0	1757	3109	1	0.435	0	0.74			4												0.523068	0.340075		TCONS_00013409	XLOC_010406
AK017867	ncRNA						AK090080,AK167625,BC052040,NM_207264,NM_001145898,AK154260	NM_001145898				1997	0	0	2011	0	1	0	0	1		4								142.864	0.072			-0.258793	0.0519799		TCONS_00015599	XLOC_012054
AK017882	ncRNA						BC026799,BC098203,NM_173439,BC088738	BC088738				1758	0	0	1765	0	1	0	0			4			1					114.12	0.065			-0.235355	0.0759089		TCONS_00011443	XLOC_008850
AK017886	ncRNA						AK164823,AK152820,AK151939,NM_178682,BC040401,AK129100,AK143867,NM_001242419,AK161132,AK030233,AK054203	AK030233				1456	0	0	1457	0	1	0	0			6								109.807	0.075			-1.24355	0.0320051		TCONS_00005576	XLOC_004495
AK017891	ncRNA											1463	0	45773	47236	2	0.031	0	1.367			2		1	1	uc009kdq.1		AK017891	Mus musculus adult male thymus cDNA, RIKEN full-length enriched library, clone:5830403F22 product:unclassifiable, full insert sequence.	83.962	0.057			-0.0216377	0.0929146		TCONS_00025640	XLOC_020015
AK017899	ncRNA									AF022770		1751	0	1299	3051	2	0.574	0	1.142					1						147.14	0.084			-0.00231298	0.0317293	-45.8397	TCONS_00000887	XLOC_000644
AK017905	ncRNA						AK170537,BC024887,AK018058,BC034881,NM_153820,AK040796,AK036520	AK040796				1574	0	0	1576	0	1	0	0			1								72.964	0.046			-1.22904	0.011786		TCONS_00015134	XLOC_011688
AK017906	ncRNA						AK147500,NM_145531,AK039286,AK049617	NM_145531				1832	0	0	1835	0	1	0	0			1			1					228.209	0.125			-1.05542	0.0316722		TCONS_00016828	XLOC_013022
AK017909	ncRNA									AK132444		1903	0	0	1903	0	1	0	0			2		1						102.121	0.054			-0.746277	0.0243869		TCONS_00002721	XLOC_002191
AK017913	ncRNA							AK164591				1169	0	0	1169	0	1	0	0			2		1	3					180.193	0.154			2.72414	0.177499	-216.8	TCONS_00019562	XLOC_015127
AK017916	ncRNA						AK010050,AK002900,BC027202,NM_024185,BC002225,AK075792,AK049869,AK009891,AK143250	AK009891				1845	0	0	1845	0	1	0	0			3		1						107.678	0.058			-1.29113	0.0245455	-52.8983	TCONS_00016148	XLOC_012477
AK017917	ncRNA								BC006770			1383	0	5667	7050	2	0.196	0	1.446			1		1						198.801	0.144	TRUE		-0.827277	0.116555		TCONS_00009101	XLOC_006973
AK017919	ncRNA						NM_172664,BC057369,BC051641,AK045308	BC051641				1774	0	0	1774	0	1	0	0	1		4								173.91	0.098			0.115167	0.294808		TCONS_00016529	XLOC_012783
AK017920	ncRNA	TRUE	AK042124	-155					AK207990			996	0	0	997	0	1	0	0			1			2					207.492	0.208			-1.13324	0.22116	8.4847	TCONS_00021065	XLOC_016394
AK017922	ncRNA						AK076177,AK018493,NM_020618,BC065043,BC047141,BC034509,BC061498,EU327026,EU327025,EU327024,EU327023,EU327022,AK013099	BC061498				1466	0	0	1466	0	1	0	0			1								252.19	0.172			-1.18198	0.0597757	-214.828	TCONS_00004955	XLOC_003996
AK017927	ncRNA	TRUE										1578	0	0	1578	0	1	0	0			5								133.486	0.085			-0.868124	0.0411522		TCONS_00020852	XLOC_016211
AK017930	ncRNA						BC022714,BC048827,AK082697,AK134252,BC060246,AJ132702,NM_019426,BC052460,AK167542,BC037617	AK082697				1167	0	0	1167	0	1	0	0	1		3								458.351	0.393			-1.14982	0.0638711		TCONS_00023214	XLOC_018091
AK017932	ncRNA	TRUE										1384	0	0	1384	0	1	0	0	1		1		1	2					13.347	0.01			-0.268106	0.0139165		TCONS_00018312	XLOC_014111
AK017935	ncRNA	TRUE										1958	0	1193	3151	1	0.621	0	0.511			5								171.545	0.088	TRUE		-1.22355	0.0768968	-17.6679	TCONS_00014791	XLOC_011425
AK017944	ncRNA						AK005099,AK031089,AK030173,AK143635,AK090028,BC023852,AK173289,AK087517,NM_026893	NM_026893				1556	0	0	1561	0	1	0	0			2		1	1					46.104	0.03			-1.29942	0.0359555		TCONS_00019874	XLOC_015395
AK017945	ncRNA	TRUE										1463	0	208	1671	1	0.876	0	0.684			1			1					26.901	0.018			4.02309	0.0677002		TCONS_00029690	XLOC_023079
AK017951	ncRNA						AK140782,AK047901,AK039648,AK154588,AK157628,AK155046,NM_146065,BC026483,AK155444	AK140782				1166	0	0	1167	0	1	0	0			3								241.24	0.207			-1.10615	0.0539364		TCONS_00010641	XLOC_008203
AK017957	ncRNA								BC059179			983	0	0	983	0	1	0	0					1										3.36354	0.243611		TCONS_00007589	XLOC_005841
AK017960	ncRNA						D25282,D25281,AK158916,NM_145732,NM_009819,NM_001109764,BC079648,BC051995	BC051995				1669	0	0	1669	0	1	0	0			8								47.756	0.029			-1.12003	0.0186164		TCONS_00023635	XLOC_018430
AK017961	ncRNA						AK141878,NM_146085,BC024809,BC024136,AK171634	AK171634			AF092039,AK007302,AK010375,AK136702,AK154232,BC048362,NM_001164406,NM_025291,NR_028355	498	0	0	498	0	1	0	0	1		2		1						62.827	0.126			-1.06095	0.012699		TCONS_00013574	XLOC_010550
AK017963	ncRNA						AK154075,AK086346,AK032790,AL355705,BC068257,AK039222,AK134213,AK017716,NM_025812,DQ182735,BC013804,AK004596,AK129010	AK017716				1052	0	0	1052	0	1	0	0			3								176.98	0.168			-0.00749283	0.0113294		TCONS_00027533	XLOC_021457
AK017965	ncRNA						BC082333,AK003844,AK021206,BC108351,AB077281,NM_145823,AK171918,AB077282,AK171340,AK153625	AK003844				1438	0	0	1440	0	1	0	0											60.128	0.042			-1.07595	0.115473	-11.7983	TCONS_00005038	XLOC_004062
AK017966	ncRNA						AK032734,BC054810,AK029990,NM_026367,AK169660,AK053781,AK030026,AK083471	AK053781				1209	0	0	1209	0	1	0	0			2								40.208	0.033			-1.337	0.0545102		TCONS_00000931	XLOC_000681
AK017968	ncRNA								AK043283			1452	0	0	1452	0	1	0	0			6								62.637	0.043			-0.852702	0.109775	-45.5742	TCONS_00008244	XLOC_006257
AK017969	ncRNA						AK132263,AK148428,BC043296,BC096618,AK052045,AK042154	AK132263				1535	0	0	1535	0	1	0	0			5		1						564.619	0.368				0.0535559		TCONS_00015082	XLOC_011646
AK017970	ncRNA						AK172609,AK131155,BC060617,AK159088,AK159362,NM_134189,AK143714,AK162424	AK162424				1444	0	0	1444	0	1	0	0						2					224.077	0.155			-1.13936	0.088408	-18.4196	TCONS_00003704	XLOC_003000
AK017971	ncRNA						AK040068,AK137792,BC156804,BC171961,BC150764,BC145402,AK169825,AK137942,AK138030,NM_001177899,NM_001177898,NM_001033186	AK040068				588	0	0	590	0	1	0	0			3								24.981	0.042			-0.986907	0.0106286		TCONS_00004037	XLOC_003270
AK017972	ncRNA						AK083572,AK148021,AK042026,AY070216,NM_173189,BC056924	AK083572				542	0	0	542	0	1	0	0			1		1						20.76	0.038			-1.28623	0.0480129		TCONS_00025784	XLOC_020130
AK017976	ncRNA	TRUE										1379	0	0	1379	0	1	0	0			1		2	2					174.425	0.126			-1.07254	0.0205741	-58.178	TCONS_00017848	XLOC_013816
AK017981	ncRNA	TRUE										1136	0	0	1137	0	1	0	0						3					109.322	0.096	TRUE		-1.19528	0.0266403		TCONS_00011049	XLOC_008531
AK017986	ncRNA						AF119821,BC141054,NM_009730,AK155069,AF116897,AB093245	AK155069				1492	0	0	1493	0	1	0	0			2								143.605	0.096			-0.912825	0.0527037	-38.6018	TCONS_00015744	XLOC_012161
AK017987	ncRNA						NM_001253862,X64840,NM_011544,NM_001253865,BC037097,M97635,AK134037	NM_001253862				1158	0	0	1160	0	1	0	0			1		1	3					125.333	0.108			-0.863081	0.0182796		TCONS_00028439	XLOC_022213
AK017990	ncRNA						AF036332,BC057667,AK078118,NM_008702,BC058652	BC058652				1025	0	0	1026	0	1	0	0			2		1						74.101	0.072			-1.13841	0.014806	-172.767	TCONS_00004788	XLOC_003849
AK017998	ncRNA	TRUE	AK046038	-133							AB167349,AK041191,AK046038,AK129105,BC139434,BC145625,NM_001004436	1297	0	0	1297	0	1	0	0			2		1	1					157.863	0.122				0.0161595		TCONS_00009007	XLOC_006891
AK017999	ncRNA									AK013893		1065	0	0	1068	0	1	0	0			1		1	1					130.508	0.123			-1.13461	0.0407535	-66.5635	TCONS_00023137	XLOC_018038
AK018000	ncRNA						BC096026,AK084124,NM_145933,BC092222,NM_001252505	BC092222				525	0	0	525	0	1	0	0			1								19.978	0.038			-0.946675	0.0920717	9.0266	TCONS_00010814	XLOC_008336
AK018006	ncRNA						L10628,BC128374,AK083380,L05631,NM_010583,L00619,BC128375,AK153613,D14042,AK079693,BC028478,AK020772,AK153692	D14042				853	0	0	853	0	1	0	0			2								67.036	0.079			-1.24699	0.0425847		TCONS_00004498	XLOC_003648
AK018007	ncRNA	TRUE										1716	0	0	1723	0	1	0	0	1		2								78.092	0.046			2.54921	0.0358553		TCONS_00010612	XLOC_008174
AK018012	ncRNA						AF128892,D83073,U10871,BC018227,AK133684,AK089059,BC085303,NM_011951,NM_001168514,NM_001168508,BC012235,NM_001168513,AK153025,AK151348	BC012235				639	0	0	639	0	1	0	0			4								19.105	0.03			-1.32846	0.00952669		TCONS_00011991	XLOC_009295
AK018017	ncRNA						AK141502,DQ296613,DQ296612,DQ296611	AK141502				1244	0	0	1245	0	1	0	0			3								26.736	0.021			0.116932	0.0451466		TCONS_00026086	XLOC_020371
AK018020	ncRNA						NM_178684,AK169333,AK035239,BC047201,AK168694,AK086896,AK048061,AK143495,AK033615,BC089366	AK048061				1014	0	0	1014	0	1	0	0			4		1						52.475	0.052			-1.23283	0.027527		TCONS_00008499	XLOC_006477
AK018026	ncRNA						BC151007,AX763684,AK220238,BC156689,BC151004,BC151000,NM_001081395,AK016526	NM_001081395				1118	0	5397	6515	1	0.172	0	0.894	1		2								110.567	0.099			-1.11269	0.112467		TCONS_00028063	XLOC_021904
AK018030	ncRNA						AK085140,BC125285,AK028730,AK029826,X57111,NM_007619,AK163907,AK153915	AK085140	BC153043			1645	0	0	1655	0	1	0	0			1								92.826	0.056			-1.30349	0.0536992		TCONS_00028224	XLOC_022034
AK018031	ncRNA						AK150105,AK088696,NM_172498,NM_001162365,AK054002,AK041878	NM_001162365				1650	0	0	1656	0	1	0	0											143.001	0.087			-0.92285	0.0346341		TCONS_00009206	XLOC_007049
AK018041	ncRNA	TRUE	AK033249	-260								1228	0	0	1228	0	1	0	0			4		1	1					183.127	0.149			-0.160522	0.0250054		TCONS_00018788	XLOC_014495
AK018042	ncRNA								AK013531	AK138933		1104	0	2712	3816	1	0.289	0	0.906			1		1						133.414	0.121			-0.990468	0.650748	-47.1721	TCONS_00026604	XLOC_020676
AK018043	ncRNA						BC057158,AK053736,BC067042,AK137245,AK039176,BC067040,NR_027375,NM_172677,NM_001145919,BC022932,AK078922,BC052631,BC042627	NM_001145919				1440	0	0	1446	0	1	0	0	1		6			1					119.07	0.083			-1.36735	0.0114616		TCONS_00017315	XLOC_013382
AK018045	ncRNA							AK155895				1306	0	0	1307	0	1	0	0			3								45.465	0.035	TRUE		-1.31438	0.051097		TCONS_00019532	XLOC_015104
AK018053	ncRNA						BC156308,AY679158,BC157041,AF263836,AK147264,NM_023872,NM_001160139	NM_001160139				1355	0	0	1356	0	1	0	0	1		2								36.464	0.027			-0.929668	0.0267002	-84.9414	TCONS_00001097	XLOC_000802
AK018061	ncRNA				BC028793	-518	AK159161,AK146903,AK165282,AK150305,AK165851,U39077,U39076,U39075,U39074,AK152737,AK151936,AK153281,AK150515,AK011988,AK141845,BC064677,NM_001080132,NM_001080131,NM_001080130,NM_001080129	AK159161				1567	0	0	1568	0	1	0	0			4								194.053	0.124			-1.29146	0.00884869		TCONS_00003170	XLOC_002560
AK018062	ncRNA						BC046777,BC038481,AK014498,AK044782,AK086803,NM_029850	NM_029850				1257	0	232	1490	1	0.844	0	0.796			3								28.852	0.023			0.0437225	0.00723558		TCONS_00021218	XLOC_016519
AK018063	ncRNA						AK162238,AF399755,NM_028964,AK017102,BC034114,AK086865	AK162238				1410	0	0	1419	0	1	0	0			2								101.66	0.072			-0.227157	0.0515239		TCONS_00010733	XLOC_008276
AK018064	ncRNA		BC013510	134						M64429	AK007495,AK010642,AK019008,AK028334,BC013510,NM_026612	1435	0	0	1436	0	1	0	0											152.206	0.106			-1.2146	0.0554197		TCONS_00023471	XLOC_018295
AK018065	ncRNA						AK163753,AK032485,AK035858,AK035773,AK036180,BC113784,BC113178,NM_178678,AK035882	AK035882	AK030166			1331	0	0	1331	0	1	0	0	1		3								71.758	0.054			-0.18145	0.00675958		TCONS_00003034	XLOC_002449
AK018066	ncRNA								AK034418			1426	0	0	1426	0	1	0	0			2		1	3					190.95	0.134			-1.05992	0.0397104		TCONS_00021952	XLOC_017139
AK018068	ncRNA						AK017063,NM_028956,NM_001033654,AK029866,AK012737,AK028368,AK088562,BC025555,AK145055,NM_028304	AK029866				1666	0	0	1670	0	1	0	0			4								337.445	0.203				0.0417573		TCONS_00003544	XLOC_002861
AK018082	ncRNA									NM_001033474		1440	0	0	1441	0	1	0	0	1		1								121.239	0.084			-1.10319	0.0421641	-57.3264	TCONS_00003318	XLOC_002674
AK018087	ncRNA									NM_176982		1249	0	0	1249	0	1	0	0	2		1								14.508	0.012			0.0160554	0.0772398		TCONS_00003492	XLOC_002820
AK018095	ncRNA									AK137169		1420	0	0	1429	0	1	0	0			1								40.399	0.028			-1.10444	0.0616692		TCONS_00008287	XLOC_006291
AK018096	ncRNA						BC119028,BC119030,NM_001162956	NM_001162956				1379	0	0	1394	0	1	0	0			3		1	1					187.157	0.136				0.0166601		TCONS_00002235	XLOC_001779
AK018099	ncRNA									BC024715		1462	0	0	1466	0	1	0	0			1								178.153	0.122	TRUE		-0.354493	0.053134		TCONS_00016243	XLOC_012555
AK018109	ncRNA						BC157095,AK047578	BC157095	BC004034	AK200002		1189	0	700	1889	1	0.629	0	0.841			2		1	1					19.154	0.016			-0.0414549	0.0573773		TCONS_00025351	XLOC_019772
AK018131	ncRNA									X56314		1295	0	0	1296	0	1	0	0			1		1	1					214.11	0.165			-1.15137	0.0198005		TCONS_00025104	XLOC_019638
AK018162	ncRNA						AF328140,AK158396,BC150714,BC145142,NM_022021,NM_001146287,AF133208,AK156273,BC043661	AK156273				2602	0	0	2602	0	1	0	0	1		5								120.96	0.046			-0.0683956	0.0971327		TCONS_00012966	XLOC_010064
AK018165	ncRNA								AK147943			793	0	0	816	0	1	0	0											170.135	0.215			-0.999389	0.0281482		TCONS_00022541	XLOC_017582
AK018174	ncRNA						BC120855,BC120853,NM_198422,AY424292,AK149213,AK172689	AY424292		AK158711		1553	0	0	1554	0	1	0	0	1		4		1	1					327.358	0.211			-1.29707	0.00734915		TCONS_00021884	XLOC_017077
AK018186	ncRNA						AK051277,NM_001164604,BC009125,AK003685,NM_026746	NM_001164604				1747	0	0	1747	0	1	0	0	1		3		1						137.051	0.078			-1.22148	0.00604137		TCONS_00009766	XLOC_007513
AK018197	ncRNA						DQ139286,DQ139289,DQ139285,DQ139288,AF011360,BC051133,NM_011880,NM_001199003	NM_001199003				2955	0	0	2955	0	1	0	0			3		1	1					44.582	0.015				0.0252661		TCONS_00001847	XLOC_001447
AK018199	ncRNA		NM_181405	-60	AK088940	-49				AK170241		1776	0	600	2385	1	0.748	0	0.563			1		1						97.258	0.055			-1.1167	0.0699698		TCONS_00001456	XLOC_001122
AK018200	ncRNA						AK129232,NM_001004357	NM_001004357				1262	0	0	1263	0	1	0	0			2								92.555	0.073			-1.26102	0.0179116		TCONS_00022687	XLOC_017679
AK018204	ncRNA						AF107780,NM_019697,BC079667,AB093280,AB045326,AK032268	AK032268				1592	0	0	1601	0	1	0	0			8								313.706	0.197			-1.33243	0.00977983		TCONS_00022466	XLOC_017520
AK018205	ncRNA								BC150962			1457	0	0	1462	0	1	0	0											490.997	0.337			-0.723117	0.259548	-46.2272	TCONS_00008267	XLOC_006278
AK018211	ncRNA						AF107780,NM_019697,BC079667,AB093280,AB045326,AK032268	AK032268				1458	0	0	1463	0	1	0	0			7								30.686	0.021			-0.982147	0.0118823		TCONS_00022467	XLOC_017521
AK018213	ncRNA		AK183098	223			U58494.1	U58494.1		U58494.1		1536	0	1526	3063	3	0.502	0	1.953					1						282.619	0.184			-1.07174	0.0375662	-127.279	TCONS_00001990	XLOC_001574
AK018214	ncRNA		AK214566	454								1129	0	151	1280	1	0.882	0	0.886			1		1		uc009qwf.1		AK018214	Mus musculus adult male medulla oblongata cDNA, RIKEN full-length enriched library, clone:6330514M13 product:high mobility group nucleosomal binding domain 3, full insert sequence.	327.948	0.29			-0.320219	0.181893	-149.813	TCONS_00027742	XLOC_021635
AK018218	ncRNA								NM_016901	NM_028307		1641	0	0	1648	0	1	0	0					1	2					434.965	0.265			-1.0186	0.0377177		TCONS_00017665	XLOC_013664
AK018220	ncRNA									AK140648		1456	0	0	1457	0	1	0	0			1		1	1					210.188	0.144			-1.29986	0.0537307		TCONS_00012971	XLOC_010069
AK018221	ncRNA	TRUE										1626	0	0	1627	0	1	0	0			10		1						249.052	0.153			-0.0781229	0.125903		TCONS_00016894	XLOC_013076
AK018224	ncRNA									AK007806		1633	0	0	1633	0	1	0	0			1		1	1					110.153	0.067			-1.00048	0.112565		TCONS_00009307	XLOC_007133
AK018225	ncRNA									BC119580		1463	0	0	1463	0	1	0	0			7		1	1					889.591	0.608			-1.09083	0.00248977		TCONS_00029708	XLOC_023093
[truncated: 26,313 more rows]

## Sheet: Column descriptions
Column	Name	Explanation
A	Accession ID	Original accession ID(s) of transcript
B	Classification	Transcript classification
C	Intergenic	Intergenic transcripts (a transcript that is >2kb upstream of a coding region on either stand and >30kb or >2kb downstream of a coding region on the sense and antisense strands respectively) with no overlap with coding transcripts
D	Head to Head Partner Accession ID	Bidirectional transcripts in a head to head orientation. 1000bp upstream to 500 bp downstream of TSS. If yes, gives accession of partner transcript
E	Head-Head Distance	Positive value is length of overlap between Head to Head transcripts. Negative value is distance between the two TSSs
F	Tail-Tail Partner Accession ID	Bidirectional transcripts in a tail to tail orientation. Transcript 3' can be from 1kb apart (upstream) to 1kb overlap (downstream) If yes, gives accession of partner transcript
G	Tail-Tail Distance	Positive value is distance between 3' ends of the transcripts. Negative value is length of overlap between 3' ends.
H	Intronic Host Accession ID (Exclusive)	Sense intronic Transcript. If yes gives accession of host transcript. Exclusive intron – start and stop site of intronic transcript must be within an intron. No exon overlap allowed.
I	Intronic Host Accession ID (All)	Sense intronic Transcript. If yes gives accession of host transcript. Inclusive intron – start or the stop site of intronic transcript may overlap host exon with allowed exon overlap limited to 25% of transcript length. Transcript does not need to start and stop in introns.
J	Antisense Partner Accession ID	Antisense Transcript. Requires 90% of transcript to overlap in antisense direction to be called antisense. If yes, gives accession of antisense partner.
K	uaRNA Host Accession ID	uaRNA – transcripts that arise in sense direction within 30kb of a coding gene stop codon or within 5 kb of a downstream start codon (which ever comes first). Accession ID of the upstream coding transcript.
L	Associated Promoter Accession ID	Single exon transcripts must be found within 3kb upstream to 1kb downstream of TSS. No 3'UTR overlap. If yes, gives accession of partner transcript.
M	Transcript Size	Largest transcript interrogated by probe
N	CDS Size	Largest CDS of within transcripts interrogated by probe
O	Intron Size	Total intronic length of longest transcript interrogated by probe
P	Genomic Size	Total genomic length of longest transcript interrogated by probe
Q	Intron Count	Number of introns in transcript with most introns interrogated by probe
R	Exon Density	Transcript size / genomic length. Reported for transcript interrogated by probe with smallest exon density
S	CDS Density	CDS size / transcript size. Reported for transcript interrogated by probe with smallest CDS density.
T	Splice Junction Density	Splice junctions per kb transcript length. Target transcript with maximum density
U	PUF Motif Frequency (whole transcript)	No. of PUF protein binding sites in transcript
V	PUF Motif Frequency (3'UTR only)	No. of PUF protein binding sites in 3'UTR only
W	ARE Motif Frequency (whole transcript)	No. of AU rich elements (AREs) in transcript
X	ARE Motif Frequency (3'UTR only)	No. of AU rich elements (AREs) in 3'UTR only
Y	Major PolyA Signal Frequency	No. of AATAAA and ATTAAA elements in last 35 nt of transcript
Z	Minor PolyA Signal Frequency	No. of AATTAA, AAATAA, AGTAAA, AATATA, CATAAA, TAATAA and AATAAT in last 35 nt of transcript
AA	UCSC Known Gene ID	UCSC Known Gene ID
AB	RefSeq ID	RefSeq ID
AC	UniGene Symbol	UniGene Symbol
AD	UniGene Name	UniGene Name
AE	PhastCons Score (Total)	Number of bases of transcript interogated by probe that overlap PhastCons conservation track (reported for transcript with maximum score)
AF	PhastCons Score (Mean)	Reports result for transcript interogated by the probe with the highest proportion of conserved bases
AG	LincRNA	Probe targets transcripts found within regions defined as long intergenic noncoding RNAs (regions from Guttman 09, Guttman 10)
AH	lncRNAdb ID	lncRNAdb is a database of characterised lncRNAs. Probe which hit transcripts in the genomic regions covered by these lncRNAs are given name of the lncRNAdb entry
AI	CPC Score	Output score from Coding Potential Calculator
AJ	CPAT Score	Output score from Coding Potential Assessment Tool
AK	PhyloCSF filtered	Output score from PhyloCSF. Only shows results for sequences where a multiple sequence alignment could be generated and which did not generate an "exception".
AL	Cuffcmp transcript	Unique transcript ID from Cuffcompare
AM	Cuffcmp loci	Unique gene loci ID from Cuffcompare
