# Supplementary material for: Improved definition of the mouse transcriptome via targeted RNA sequencing
Source: HighWire-hosted journal article supplement (doi:10.1101/gr.199760.115), 2016-05-01
Supplement: Supplementary_data_12.xlsx [file Supplementary_data_12.xlsx]

## Sheet: Sheet1
Gene/Transcript	Forward primer	Reverse Primer
Roche control 1 (237)	CGCATTCCTCATCCCAGTATG	AAAGGACTTGGTGCAGAGTTCAG
Roche control 2 (268)	CTCGCTTAACCAGACTCATCTACTGT	ACTTGGCTCAGCTGTATGAAGGT
Roche control 3 (272)	CAGCCCCAGCTCAGGTACAG	ATGATGCGAGTGCTGATGATG
Blm	GGAAATATCTCACTGCGTGCT	TGACGTGAGTTTCCTTCGTATG
Nuf2	AGCGAGAGGAGTTCAAGCAG	TCGGATTTCATTTTGGCATA
Cbr3	ACACCCTTCGACATTCAAGC	GGCTTTTAACCCCTGCAGAC
Malat1	TAAGCGCTTGCCTCTGTCTT	CACCTGCATTCTGTGTGGTC
Snhg14	GTCCGAACCTGTGAACTTCTG	GGCTGTAGAACCAACGGCTA
AK020679	AGGAACACAGGAGTGGCAAG	AGTCTCTAGCAGCGGGAATG
